# Supplementary material for: Comparison against 186 canid whole-genome sequences reveals survival strategies of an ancient clonally transmissible canine tumor
Source: PubMed Central journal article supplement — Genome Res. 2015 Nov;25(11):1646–55. doi: 10.1101/gr.190314.115 (PMC4617961; doi:10.1101/gr.190314.115), 2015-11
Supplement: supp_gr.190314.115_Supplemental_Information.pdf [file supp_gr.190314.115_Supplemental_Information.pdf]

## Supplementary Figures

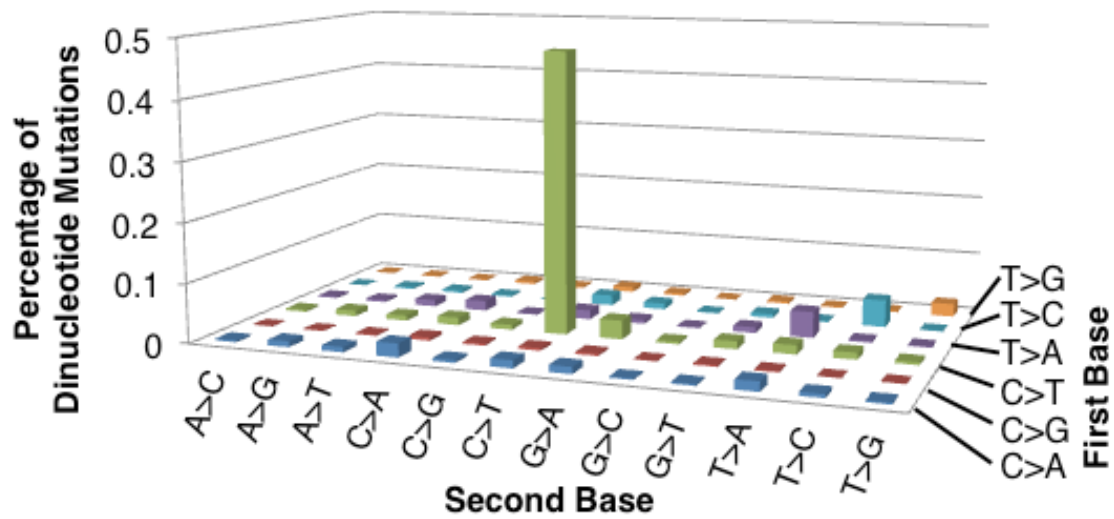

**Fig. S1.** Dinucleotide substitution profile among CTVT somatic mutation candidates. The first base has the lower coordinate in the reference sequence, and strandedness was determined using the first base pyrimidine context. CC>TT/GG>AA dinucleotide substitutions predominated, accounting for 47.2% of the 4,758 somatic events shared by both tumors. This phenomenon is seen in human melanoma tumors, and results from exposure to UV radiation (Alexandrov et al. 2013). This signal is very similar, but somewhat stronger than previously observed for these tumors (Murchison et al. 2014), which supports our hypothesis that our candidate somatic mutations are enriched for true somatic variants.



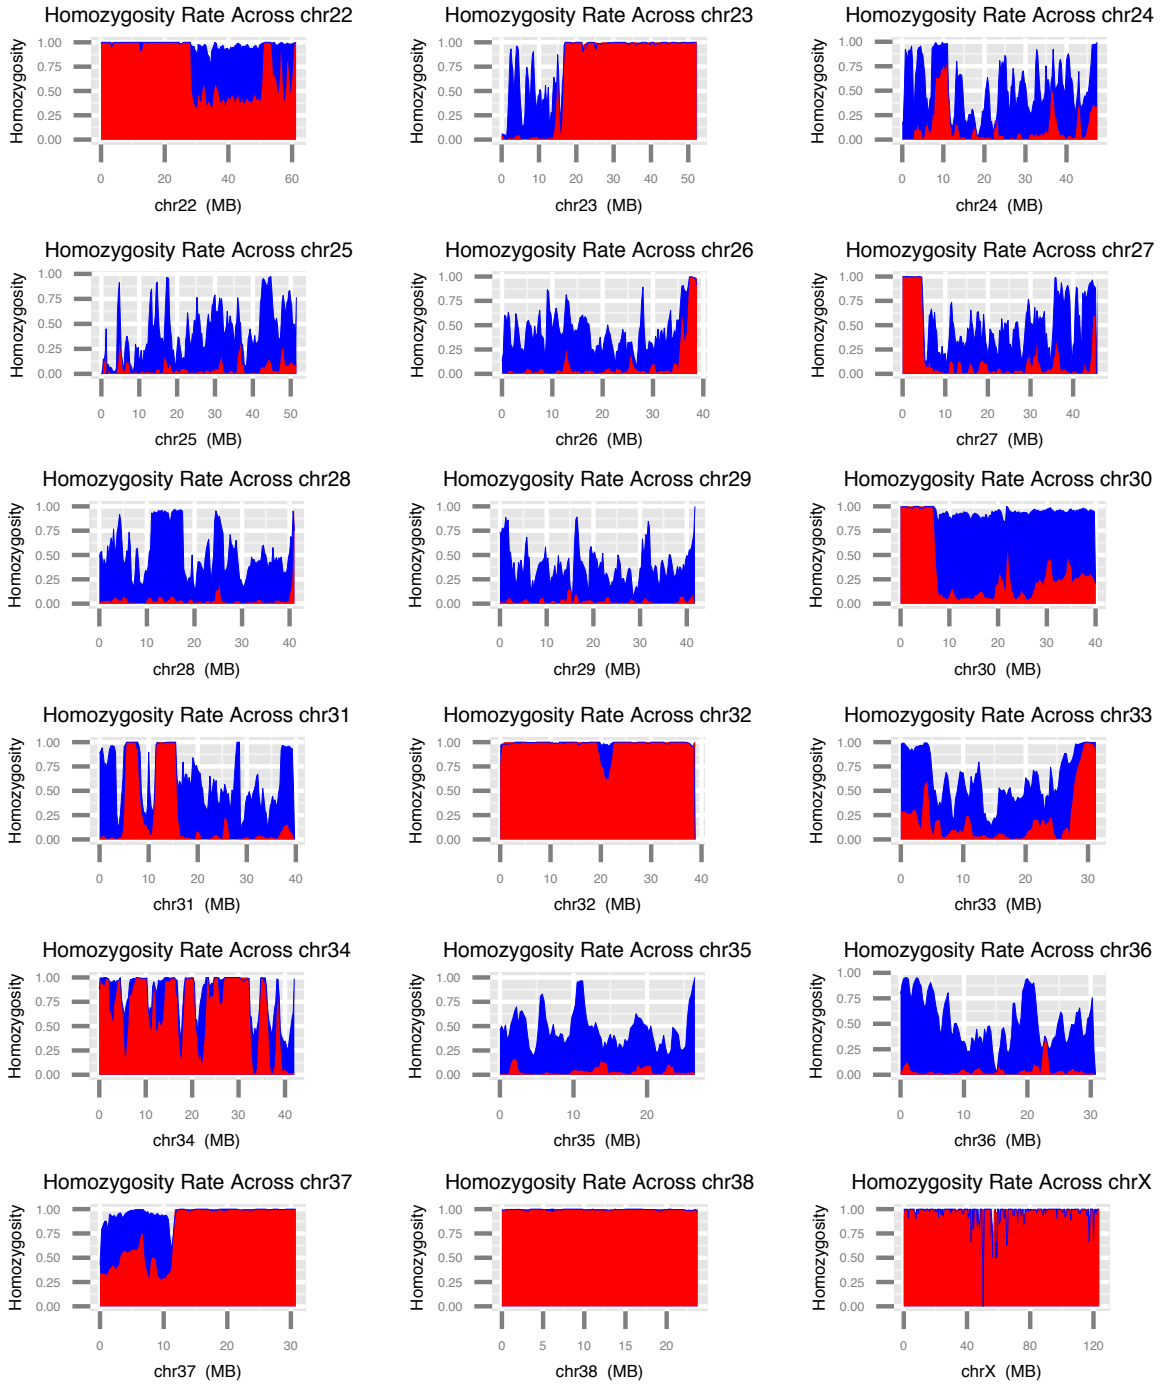

**Fig. S2.** Germline (blue) and somatic (red) homozygosity in CTVT across all canine chromosomes.

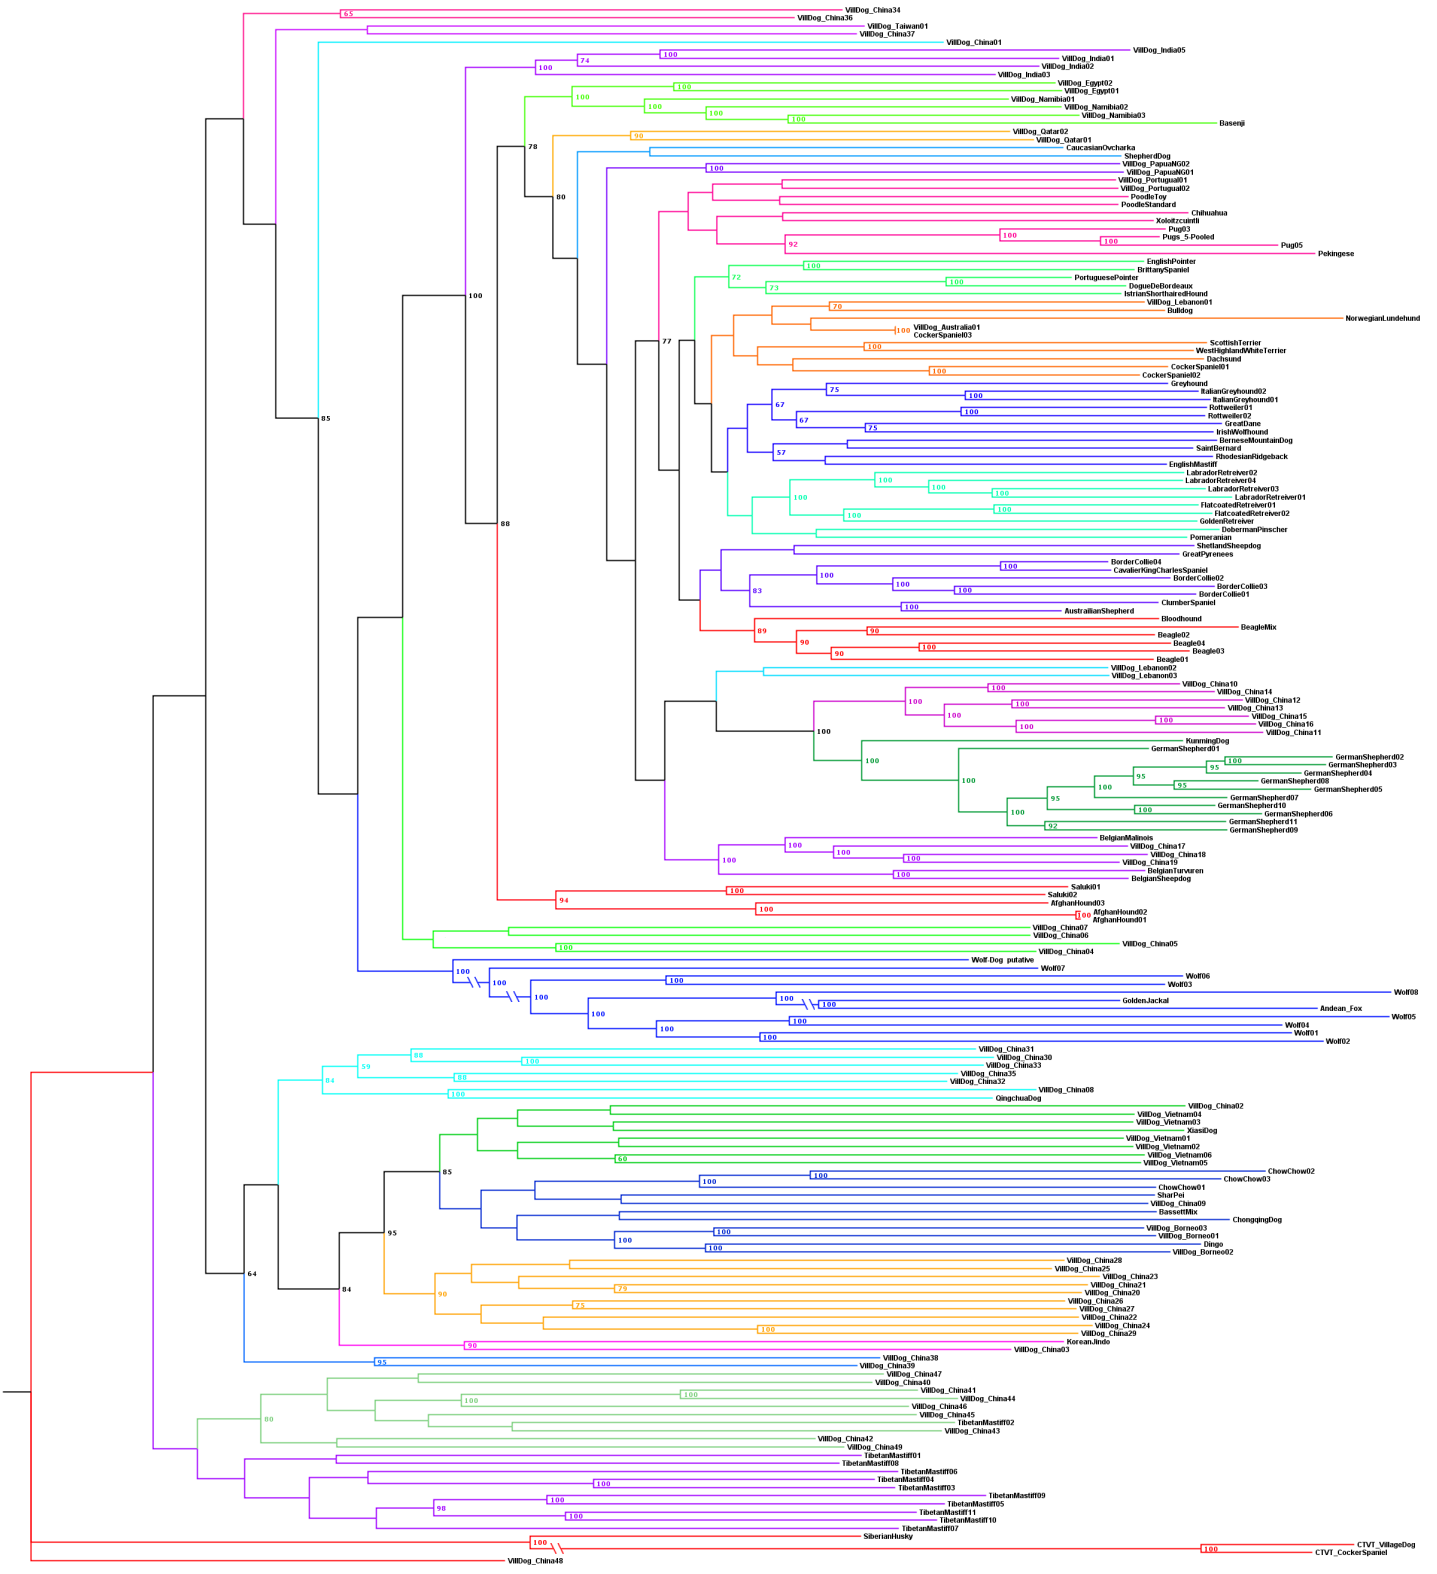

**Figure S3.** Unrooted maximum likelihood phylogenetic tree for all individuals in our canine variation catalog. Bootstrap support greater than 50 is noted on each corresponding node. Clade coloration corresponds to major monophyletic groups. Lengths of the CTVT tumor branch and the wild canid branch have been abbreviated for display area considerations.

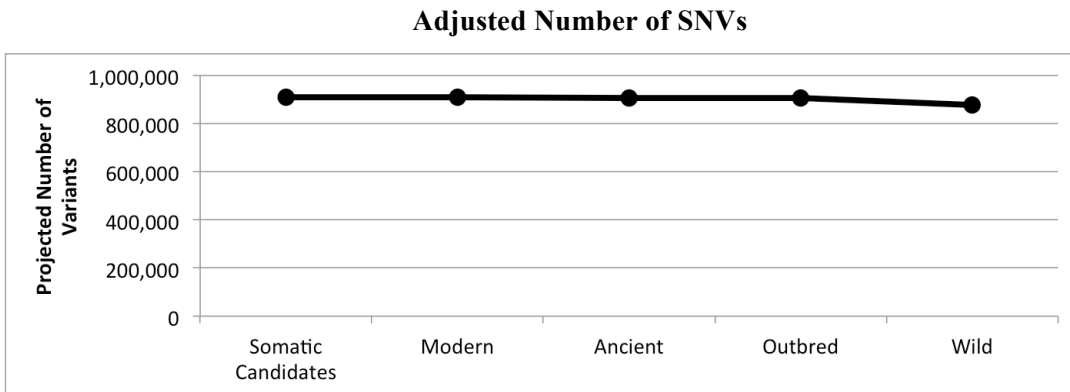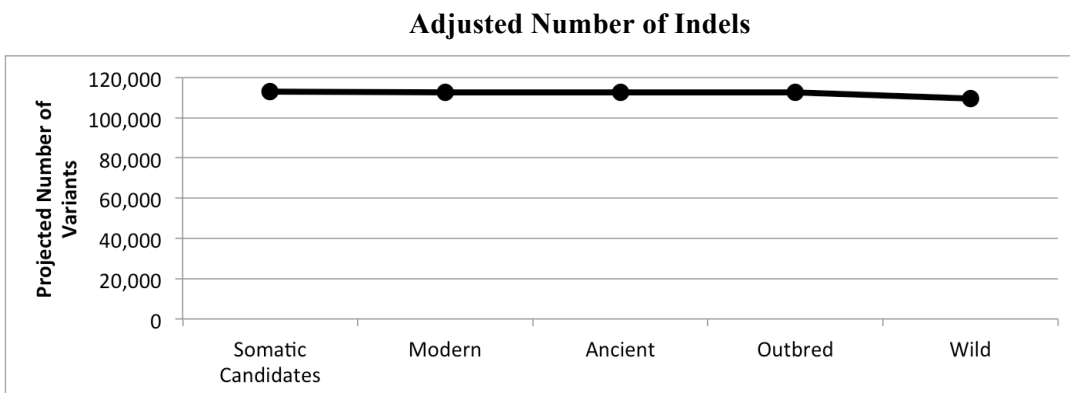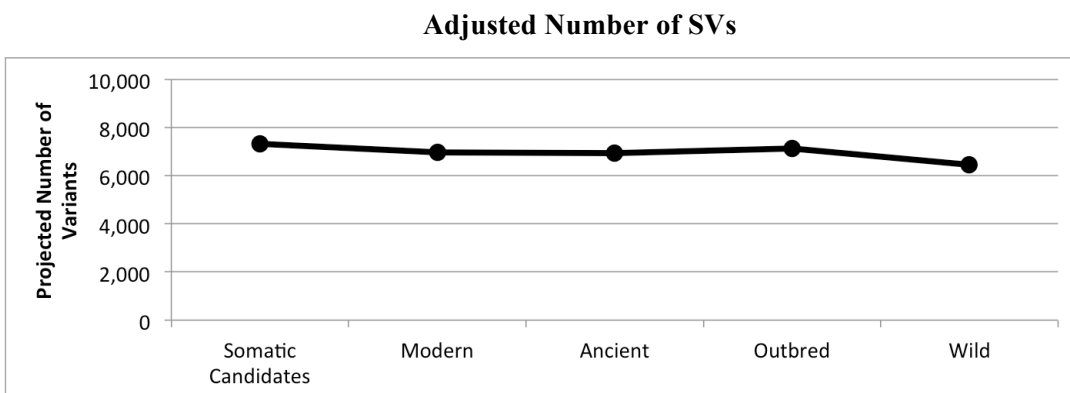

**Fig. S4.** Estimated number somatic SNVs, indels, and SVs, adjusted for average fraction of variants from one individual found in other canids, evaluated by canid group. Since wolves harbored more private variation than other canids, lower somatic mutation estimates result from wolf-based projections. If the founder had diversity similar to wolves, the total number of somatic mutations is likely ~3.7% lower than our raw number of somatic mutation candidates.

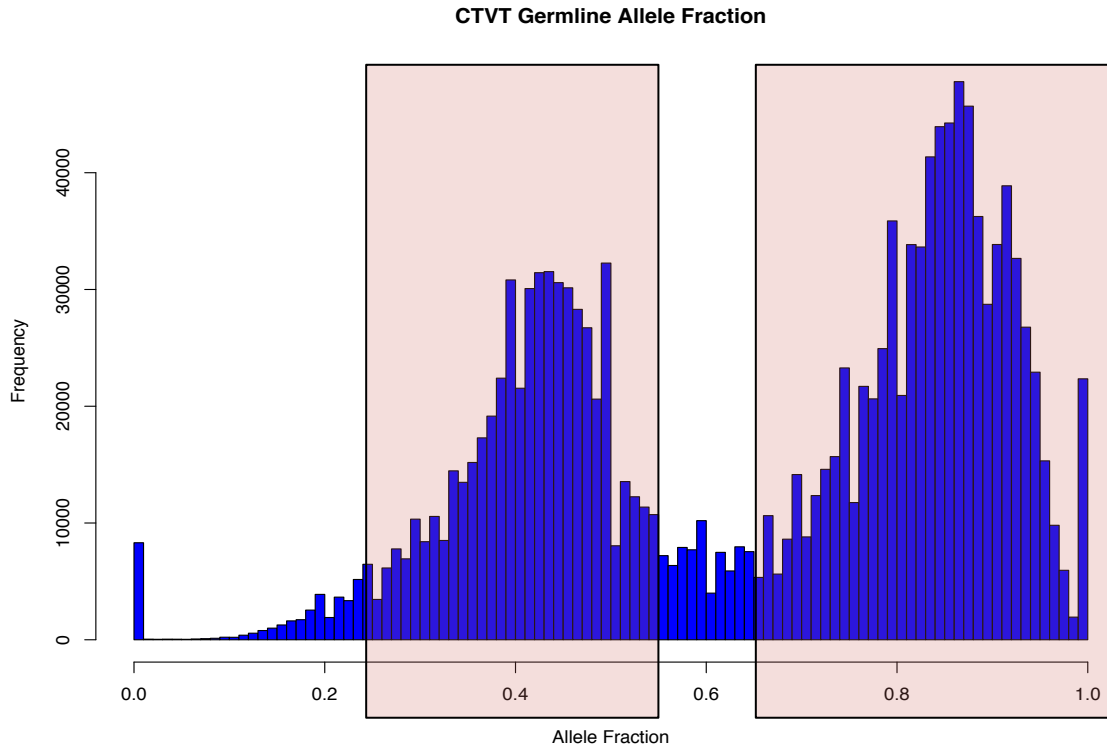

**Fig. S5.** Somatic allele fraction for putative CTVT founder inherited alleles, excluding positions where either of the host dogs also carried an alternate allele. The bimodal distribution enabled confident classification of homozygous versus heterozygous genotypes, as indicated by the boxes.
