# Supplementary material for: Comparison against 186 canid whole-genome sequences reveals survival strategies of an ancient clonally transmissible canine tumor
Source: HighWire-hosted journal article supplement (doi:10.1101/gr.190314.115), 2015-07-31
Supplement: Supplemental_Tables.xlsx [file Supplemental_Tables.xlsx]

## Sheet: Table S1
Table S1. Sources and details for whole genome and SNP data for each each canid or CTVT genome. The five pug genomes were sequenced as a pool and were treated as a single individual in breed-based analyses.
Canid_ID	Platform	Coverage	Project ID	Sample ID	Citation
Basenji01	Illumina HiSeq 2000	6.52407	N/A	N/A	Freedman, Adam H., et al. "Genome sequencing highlights the dynamic early history of dogs." PLoS genetics 10.1 (2014): e1004016.
Dingo01	Illumina HiSeq 2000	7.06361	N/A	N/A	Freedman, Adam H., et al. "Genome sequencing highlights the dynamic early history of dogs." PLoS genetics 10.1 (2014): e1004016.
Wolf05	Illumina HiSeq 2000	29.6271	N/A	N/A	Freedman, Adam H., et al. "Genome sequencing highlights the dynamic early history of dogs." PLoS genetics 10.1 (2014): e1004016.
Wolf06	Illumina HiSeq 2000	9.15509	N/A	N/A	Freedman, Adam H., et al. "Genome sequencing highlights the dynamic early history of dogs." PLoS genetics 10.1 (2014): e1004016.
Wolf07	Illumina HiSeq 2000	7.21187	N/A	N/A	Freedman, Adam H., et al. "Genome sequencing highlights the dynamic early history of dogs." PLoS genetics 10.1 (2014): e1004016.
Jindo01	Illumina HiSeq 2000	45.1322	PRJDB2266	SAMD00009664	Kim, RN, et al. "Genome analysis of the domestic dog (Korean Jindo) by massively parallel sequencing." DNA research 19.3 (2012): 275-288.
CockerSpaniel_CTVT	Illumina HiSeq 2000 / Illumina GAIIx	47.1389	PRJEB2162	SAMEA676122	Murchison, E.P., et al. "Transmissable Dog Cancer Genome Reveals the Origin and History of an Ancient Cell Lineage." science 343.6169 (2014): 437-440.
CockerSpaniel03	Illumina HiSeq 2000	23.879	PRJEB2162	SAMEA1521941	Murchison, E.P., et al. "Transmissable Dog Cancer Genome Reveals the Origin and History of an Ancient Cell Lineage." science 343.6169 (2014): 437-440.
VillDog_Australia_CTVT	Illumina HiSeq 2000 / Illumina GAIIx	128.844	PRJEB2162	SAMEA676105	Murchison, E.P., et al. "Transmissable Dog Cancer Genome Reveals the Origin and History of an Ancient Cell Lineage." science 343.6169 (2014): 437-440.
VillDog_Australia01	Illumina HiSeq 2000	24.6598	PRJEB2162	SAMEA1521940	Murchison, E.P., et al. "Transmissable Dog Cancer Genome Reveals the Origin and History of an Ancient Cell Lineage." science 343.6169 (2014): 437-440.
Beagle03	Illumina HiSeq 2000	10.9148	PRJEB5500	SAMEA2376414	Drögemüller, M, et al. "A frameshift mutation in the cubilin gene (CUBN) in Beagles with Imerslund–Gräsbeck syndrome (selective cobalamin malabsorption)." Animal genetics 45.1 (2014): 148-150.
LabradorRetreiver01	Illumina HiSeq 2000	43.1748	PRJEB5874	SAMEA2417015	Jagannathan, V, et al. "A mutation in the SUV39H2 gene in Labrador Retrievers with hereditary nasal parakeratosis (HNPK) provides insights into the epigenetics of keratinocyte differentiation." PLoS genetics 9.10 (2013): e1003848.
LabradorRetreiver02	Illumina HiSeq 2000	29.5754	PRJEB5875	SAMEA2417016	Frischknecht, M, et al. "A COL11A2 mutation in Labrador Retrievers with mild disproportionate dwarfism." PloS one 8.3 (2013): e60149.
Landseer01	Illumina HiSeq 2000	23.9721	PRJEB7734	SAMEA3121328	This publication
Rottweiler02	Illumina HiSeq 2000	46.2659	PRJEB7735	SAMEA3121337	This publication
Dachshund01	Illumina HiSeq 2000	17.9538	PRJEB7736	SAMEA3121338	This publication
Beagle02	Illumina HiSeq 2000	51.8375	PRJNA176193	SAMN01737209	No Citation
NorwegianLundehund01	Illumina GAIIx	23.4686	PRJNA186960	SAMN01893932	No Citation
BorderCollie01	Illumina HiSeq 2000	10.9148	PRJNA188158	SAMN01908107	Owczarek-Lipska, M, et al. "A frameshift mutation in the cubilin gene (CUBN) in Border Collies with Imerslund-Gräsbeck syndrome (selective cobalamin malabsorption)." PloS one 8.4 (2013): e61144.
BelgianMalinois01	Illumina GAIIx	11.8874	PRJNA192935	SAMN01974495	Wang, G-D, et al. "The genomics of selection in dogs and the parallel evolution between dogs and humans." Nature communications 4 (2013): 1860.
GermanShepherd01	Illumina GAIIx	11.2418	PRJNA192935	SAMN01974494	Wang, G-D, et al. "The genomics of selection in dogs and the parallel evolution between dogs and humans." Nature communications 4 (2013): 1860.
TibetanMastiff01	Illumina GAIIx	13.6818	PRJNA192935	SAMN01974493	Wang, G-D, et al. "The genomics of selection in dogs and the parallel evolution between dogs and humans." Nature communications 4 (2013): 1860.
VillDog_China01	Illumina GAIIx	27.1697	PRJNA192935	SAMN01974492	Wang, G-D, et al. "The genomics of selection in dogs and the parallel evolution between dogs and humans." Nature communications 4 (2013): 1860.
VillDog_China02	Illumina GAIIx	20.9314	PRJNA192935	SAMN01974491	Wang, G-D, et al. "The genomics of selection in dogs and the parallel evolution between dogs and humans." Nature communications 4 (2013): 1860.
VillDog_China03	Illumina GAIIx	11.9139	PRJNA192935	SAMN01974490	Wang, G-D, et al. "The genomics of selection in dogs and the parallel evolution between dogs and humans." Nature communications 4 (2013): 1860.
Wolf01	Illumina GAIIx	13.7799	PRJNA192935	SAMN01974489	Wang, G-D, et al. "The genomics of selection in dogs and the parallel evolution between dogs and humans." Nature communications 4 (2013): 1860.
Wolf02	Illumina GAIIx	10.641	PRJNA192935	SAMN01974488	Wang, G-D, et al. "The genomics of selection in dogs and the parallel evolution between dogs and humans." Nature communications 4 (2013): 1860.
Wolf03	Illumina GAIIx	14.3603	PRJNA192935	SAMN01974487	Wang, G-D, et al. "The genomics of selection in dogs and the parallel evolution between dogs and humans." Nature communications 4 (2013): 1860.
Wolf04	Illumina GAIIx	10.648	PRJNA192935	SAMN01974486	Wang, G-D, et al. "The genomics of selection in dogs and the parallel evolution between dogs and humans." Nature communications 4 (2013): 1860.
AfghanHound01	Illumina HiSeq 2000	30.0152	PRJNA208087	SAMN02194723	Kim, H-M, et al. "Whole genome comparison of donor and cloned dogs." Scientific reports 3 (2013).
AfghanHound02	Illumina HiSeq 2000	33.1924	PRJNA208087	SAMN02194722	Kim, H-M, et al. "Whole genome comparison of donor and cloned dogs." Scientific reports 3 (2013).
AfghanHound03	Illumina HiSeq 2000	7.86546	PRJNA232497	SAMN02485564	Auton, A, et al. "Genetic recombination is targeted towards gene promoter regions in dogs." PLoS genetics 9.12 (2013): e1003984.
Bassett01	Illumina HiSeq 2000	7.15827	PRJNA232497	SAMN02487034	Auton, A, et al. "Genetic recombination is targeted towards gene promoter regions in dogs." PLoS genetics 9.12 (2013): e1003984.
CaucasianOvcharka01	Illumina HiSeq 2000	11.3786	PRJNA232497	SAMN02485573	Auton, A, et al. "Genetic recombination is targeted towards gene promoter regions in dogs." PLoS genetics 9.12 (2013): e1003984.
ChongqingDog01	Illumina HiSeq 2000	8.22218	PRJNA232497	SAMN02485598	Auton, A, et al. "Genetic recombination is targeted towards gene promoter regions in dogs." PLoS genetics 9.12 (2013): e1003984.
ChowChow03	Illumina HiSeq 2000	8.13788	PRJNA232497	SAMN02485578	Auton, A, et al. "Genetic recombination is targeted towards gene promoter regions in dogs." PLoS genetics 9.12 (2013): e1003984.
IstrianShorthairedHound01	Illumina HiSeq 2000	8.50139	PRJNA232497	SAMN02485574	Auton, A, et al. "Genetic recombination is targeted towards gene promoter regions in dogs." PLoS genetics 9.12 (2013): e1003984.
KunmingDog01	Illumina HiSeq 2000	8.51941	PRJNA232497	SAMN02485584	Auton, A, et al. "Genetic recombination is targeted towards gene promoter regions in dogs." PLoS genetics 9.12 (2013): e1003984.
LabradorRetreiver03	Illumina HiSeq 2000	9.93383	PRJNA232497	SAMN02485579	Auton, A, et al. "Genetic recombination is targeted towards gene promoter regions in dogs." PLoS genetics 9.12 (2013): e1003984.
QingchuanDog01	Illumina HiSeq 2000	7.78854	PRJNA232497	SAMN02485565	Auton, A, et al. "Genetic recombination is targeted towards gene promoter regions in dogs." PLoS genetics 9.12 (2013): e1003984.
SharPei01	Illumina HiSeq 2000	7.75361	PRJNA232497	SAMN02485577	Auton, A, et al. "Genetic recombination is targeted towards gene promoter regions in dogs." PLoS genetics 9.12 (2013): e1003984.
ShepherdDog01	Illumina HiSeq 2000	8.5008	PRJNA232497	SAMN02485575	Auton, A, et al. "Genetic recombination is targeted towards gene promoter regions in dogs." PLoS genetics 9.12 (2013): e1003984.
TibetanMastiffMIX01	Illumina HiSeq 2000	9.22018	PRJNA232497	SAMN02485572	Auton, A, et al. "Genetic recombination is targeted towards gene promoter regions in dogs." PLoS genetics 9.12 (2013): e1003984.
Tornjak01	Illumina HiSeq 2000	6.86239	PRJNA232497	SAMN02485586	Auton, A, et al. "Genetic recombination is targeted towards gene promoter regions in dogs." PLoS genetics 9.12 (2013): e1003984.
VillDog_Borneo01	Illumina HiSeq 2000	5.4901	PRJNA232497	SAMN02485567	Auton, A, et al. "Genetic recombination is targeted towards gene promoter regions in dogs." PLoS genetics 9.12 (2013): e1003984.
VillDog_Borneo02	Illumina HiSeq 2000	7.79547	PRJNA232497	SAMN02485588	Auton, A, et al. "Genetic recombination is targeted towards gene promoter regions in dogs." PLoS genetics 9.12 (2013): e1003984.
VillDog_Borneo03	Illumina HiSeq 2000	6.25996	PRJNA232497	SAMN02485589	Auton, A, et al. "Genetic recombination is targeted towards gene promoter regions in dogs." PLoS genetics 9.12 (2013): e1003984.
VillDog_China04	Illumina HiSeq 2000	7.94494	PRJNA232497	SAMN02485590	Auton, A, et al. "Genetic recombination is targeted towards gene promoter regions in dogs." PLoS genetics 9.12 (2013): e1003984.
VillDog_China05	Illumina HiSeq 2000	8.53946	PRJNA232497	SAMN02485568	Auton, A, et al. "Genetic recombination is targeted towards gene promoter regions in dogs." PLoS genetics 9.12 (2013): e1003984.
VillDog_China06	Illumina HiSeq 2000	8.33923	PRJNA232497	SAMN02485569	Auton, A, et al. "Genetic recombination is targeted towards gene promoter regions in dogs." PLoS genetics 9.12 (2013): e1003984.
VillDog_China07	Illumina HiSeq 2000	7.92333	PRJNA232497	SAMN02485570	Auton, A, et al. "Genetic recombination is targeted towards gene promoter regions in dogs." PLoS genetics 9.12 (2013): e1003984.
VillDog_China08	Illumina HiSeq 2000	8.38552	PRJNA232497	SAMN02485571	Auton, A, et al. "Genetic recombination is targeted towards gene promoter regions in dogs." PLoS genetics 9.12 (2013): e1003984.
VillDog_China09	Illumina HiSeq 2000	8.1944	PRJNA232497	SAMN02485576	Auton, A, et al. "Genetic recombination is targeted towards gene promoter regions in dogs." PLoS genetics 9.12 (2013): e1003984.
VillDog_Egypt01	Illumina HiSeq 2000	8.68785	PRJNA232497	SAMN02485581	Auton, A, et al. "Genetic recombination is targeted towards gene promoter regions in dogs." PLoS genetics 9.12 (2013): e1003984.
VillDog_Egypt02	Illumina HiSeq 2000	7.69923	PRJNA232497	SAMN02485582	Auton, A, et al. "Genetic recombination is targeted towards gene promoter regions in dogs." PLoS genetics 9.12 (2013): e1003984.
VillDog_India01	Illumina HiSeq 2000	14.184	PRJNA232497	SAMN02485583	Auton, A, et al. "Genetic recombination is targeted towards gene promoter regions in dogs." PLoS genetics 9.12 (2013): e1003984.
VillDog_India02	Illumina HiSeq 2000	7.953	PRJNA232497	SAMN02485599	Auton, A, et al. "Genetic recombination is targeted towards gene promoter regions in dogs." PLoS genetics 9.12 (2013): e1003984.
VillDog_India03	Illumina HiSeq 2000	10.475	PRJNA232497	SAMN02485600	Auton, A, et al. "Genetic recombination is targeted towards gene promoter regions in dogs." PLoS genetics 9.12 (2013): e1003984.
VillDog_India05	Illumina HiSeq 2000	8.39	PRJNA232497	SAMN02485585	Auton, A, et al. "Genetic recombination is targeted towards gene promoter regions in dogs." PLoS genetics 9.12 (2013): e1003984.
VillDog_Lebanon01	Illumina HiSeq 2000	9.03054	PRJNA232497	SAMN02485604	Auton, A, et al. "Genetic recombination is targeted towards gene promoter regions in dogs." PLoS genetics 9.12 (2013): e1003984.
VillDog_Lebanon02	Illumina HiSeq 2000	9.48434	PRJNA232497	SAMN02485587	Auton, A, et al. "Genetic recombination is targeted towards gene promoter regions in dogs." PLoS genetics 9.12 (2013): e1003984.
VillDog_Lebanon03	Illumina HiSeq 2000	9.78908	PRJNA232497	SAMN02485591	Auton, A, et al. "Genetic recombination is targeted towards gene promoter regions in dogs." PLoS genetics 9.12 (2013): e1003984.
VillDog_Namibia01	Illumina HiSeq 2000	8.49921	PRJNA232497	SAMN02485592	Auton, A, et al. "Genetic recombination is targeted towards gene promoter regions in dogs." PLoS genetics 9.12 (2013): e1003984.
VillDog_Namibia02	Illumina HiSeq 2000	8.49921	PRJNA232497	SAMN02485593	Auton, A, et al. "Genetic recombination is targeted towards gene promoter regions in dogs." PLoS genetics 9.12 (2013): e1003984.
VillDog_Namibia03	Illumina HiSeq 2000	7.66261	PRJNA232497	SAMN02485594	Auton, A, et al. "Genetic recombination is targeted towards gene promoter regions in dogs." PLoS genetics 9.12 (2013): e1003984.
VillDog_PapuaNG01	Illumina HiSeq 2000	8.82227	PRJNA232497	SAMN02485595	Auton, A, et al. "Genetic recombination is targeted towards gene promoter regions in dogs." PLoS genetics 9.12 (2013): e1003984.
VillDog_PapuaNG02	Illumina HiSeq 2000	6.4592	PRJNA232497	SAMN02485596	Auton, A, et al. "Genetic recombination is targeted towards gene promoter regions in dogs." PLoS genetics 9.12 (2013): e1003984.
VillDog_Portugual01	Illumina HiSeq 2000	18.2112	PRJNA232497	SAMN02485597	Auton, A, et al. "Genetic recombination is targeted towards gene promoter regions in dogs." PLoS genetics 9.12 (2013): e1003984.
VillDog_Portugual02	Illumina HiSeq 2000	15.3056	PRJNA232497	SAMN02485601	Auton, A, et al. "Genetic recombination is targeted towards gene promoter regions in dogs." PLoS genetics 9.12 (2013): e1003984.
VillDog_Qatar01	Illumina HiSeq 2000	13.6736	PRJNA232497	SAMN02485602	Auton, A, et al. "Genetic recombination is targeted towards gene promoter regions in dogs." PLoS genetics 9.12 (2013): e1003984.
VillDog_Qatar02	Illumina HiSeq 2000	6.7186	PRJNA232497	SAMN02485603	Auton, A, et al. "Genetic recombination is targeted towards gene promoter regions in dogs." PLoS genetics 9.12 (2013): e1003984.
VillDog_Taiwan01	Illumina HiSeq 2000	15.5189	PRJNA232497	SAMN02485605	Auton, A, et al. "Genetic recombination is targeted towards gene promoter regions in dogs." PLoS genetics 9.12 (2013): e1003984.
VillDog_Vietnam01	Illumina HiSeq 2000	10.333	PRJNA232497	SAMN02485606	Auton, A, et al. "Genetic recombination is targeted towards gene promoter regions in dogs." PLoS genetics 9.12 (2013): e1003984.
VillDog_Vietnam02	Illumina HiSeq 2000	7.89844	PRJNA232497	SAMN02485607	Auton, A, et al. "Genetic recombination is targeted towards gene promoter regions in dogs." PLoS genetics 9.12 (2013): e1003984.
VillDog_Vietnam03	Illumina HiSeq 2000	7.89844	PRJNA232497	SAMN02485608	Auton, A, et al. "Genetic recombination is targeted towards gene promoter regions in dogs." PLoS genetics 9.12 (2013): e1003984.
VillDog_Vietnam04	Illumina HiSeq 2000	9.98501	PRJNA232497	SAMN02485609	Auton, A, et al. "Genetic recombination is targeted towards gene promoter regions in dogs." PLoS genetics 9.12 (2013): e1003984.
VillDog_Vietnam05	Illumina HiSeq 2000	9.65852	PRJNA232497	SAMN02485610	Auton, A, et al. "Genetic recombination is targeted towards gene promoter regions in dogs." PLoS genetics 9.12 (2013): e1003984.
VillDog_Vietnam06	Illumina HiSeq 2000	6.65585	PRJNA232497	SAMN02485611	Auton, A, et al. "Genetic recombination is targeted towards gene promoter regions in dogs." PLoS genetics 9.12 (2013): e1003984.
XiasiDog01	Illumina HiSeq 2000	8.22232	PRJNA232497	SAMN02485612	Auton, A, et al. "Genetic recombination is targeted towards gene promoter regions in dogs." PLoS genetics 9.12 (2013): e1003984.
Xoloitzcuintli01	Illumina HiSeq 2000	15.8079	PRJNA232497	SAMN02485613	Auton, A, et al. "Genetic recombination is targeted towards gene promoter regions in dogs." PLoS genetics 9.12 (2013): e1003984.
GermanShepherd02	Illumina HiSeq 2000	16.2325	PRJNA233638	SAMN02485614	Li, Yan, et al. "Population variation revealed high-altitude adaptation of Tibetan mastiffs." Molecular biology and evolution 31.5 (2014): 1200-1205.
GermanShepherd03	Illumina HiSeq 2000	17.0188	PRJNA233638	SAMN02485580	Li, Yan, et al. "Population variation revealed high-altitude adaptation of Tibetan mastiffs." Molecular biology and evolution 31.5 (2014): 1200-1205.
GermanShepherd04	Illumina HiSeq 2000	16.6357	PRJNA233638	SAMN02485566	Li, Yan, et al. "Population variation revealed high-altitude adaptation of Tibetan mastiffs." Molecular biology and evolution 31.5 (2014): 1200-1205.
GermanShepherd05	Illumina HiSeq 2000	16.5509	PRJNA233638	SAMN02585204	Li, Yan, et al. "Population variation revealed high-altitude adaptation of Tibetan mastiffs." Molecular biology and evolution 31.5 (2014): 1200-1205.
GermanShepherd06	Illumina HiSeq 2000	15.9509	PRJNA233638	SAMN02585205	Li, Yan, et al. "Population variation revealed high-altitude adaptation of Tibetan mastiffs." Molecular biology and evolution 31.5 (2014): 1200-1205.
GermanShepherd07	Illumina HiSeq 2000	16.8352	PRJNA233638	SAMN02585206	Li, Yan, et al. "Population variation revealed high-altitude adaptation of Tibetan mastiffs." Molecular biology and evolution 31.5 (2014): 1200-1205.
GermanShepherd08	Illumina HiSeq 2000	17.4608	PRJNA233638	SAMN02585207	Li, Yan, et al. "Population variation revealed high-altitude adaptation of Tibetan mastiffs." Molecular biology and evolution 31.5 (2014): 1200-1205.
GermanShepherd09	Illumina HiSeq 2000	15.8646	PRJNA233638	SAMN02585208	Li, Yan, et al. "Population variation revealed high-altitude adaptation of Tibetan mastiffs." Molecular biology and evolution 31.5 (2014): 1200-1205.
GermanShepherd10	Illumina HiSeq 2000	17.5715	PRJNA233638	SAMN02585209	Li, Yan, et al. "Population variation revealed high-altitude adaptation of Tibetan mastiffs." Molecular biology and evolution 31.5 (2014): 1200-1205.
GermanShepherd11	Illumina HiSeq 2000	16.5279	PRJNA233638	SAMN02585210	Li, Yan, et al. "Population variation revealed high-altitude adaptation of Tibetan mastiffs." Molecular biology and evolution 31.5 (2014): 1200-1205.
TibetanMastiff02	Illumina HiSeq 2000	16.6653	PRJNA233638	SAMN02585160	Li, Yan, et al. "Population variation revealed high-altitude adaptation of Tibetan mastiffs." Molecular biology and evolution 31.5 (2014): 1200-1205.
TibetanMastiff03	Illumina HiSeq 2000	14.8513	PRJNA233638	SAMN02585159	Li, Yan, et al. "Population variation revealed high-altitude adaptation of Tibetan mastiffs." Molecular biology and evolution 31.5 (2014): 1200-1205.
TibetanMastiff04	Illumina HiSeq 2000	15.1882	PRJNA233638	SAMN02585158	Li, Yan, et al. "Population variation revealed high-altitude adaptation of Tibetan mastiffs." Molecular biology and evolution 31.5 (2014): 1200-1205.
TibetanMastiff05	Illumina HiSeq 2000	14.434	PRJNA233638	SAMN02585157	Li, Yan, et al. "Population variation revealed high-altitude adaptation of Tibetan mastiffs." Molecular biology and evolution 31.5 (2014): 1200-1205.
TibetanMastiff06	Illumina HiSeq 2000	15.4546	PRJNA233638	SAMN02585156	Li, Yan, et al. "Population variation revealed high-altitude adaptation of Tibetan mastiffs." Molecular biology and evolution 31.5 (2014): 1200-1205.
TibetanMastiff07	Illumina HiSeq 2000	16.0603	PRJNA233638	SAMN02585155	Li, Yan, et al. "Population variation revealed high-altitude adaptation of Tibetan mastiffs." Molecular biology and evolution 31.5 (2014): 1200-1205.
TibetanMastiff08	Illumina HiSeq 2000	17.2614	PRJNA233638	SAMN02585154	Li, Yan, et al. "Population variation revealed high-altitude adaptation of Tibetan mastiffs." Molecular biology and evolution 31.5 (2014): 1200-1205.
TibetanMastiff09	Illumina HiSeq 2000	15.2674	PRJNA233638	SAMN02585153	Li, Yan, et al. "Population variation revealed high-altitude adaptation of Tibetan mastiffs." Molecular biology and evolution 31.5 (2014): 1200-1205.
TibetanMastiff10	Illumina HiSeq 2000	17.2995	PRJNA233638	SAMN02585152	Li, Yan, et al. "Population variation revealed high-altitude adaptation of Tibetan mastiffs." Molecular biology and evolution 31.5 (2014): 1200-1205.
TibetanMastiff11	Illumina HiSeq 2000	17.287	PRJNA233638	SAMN02570458	Li, Yan, et al. "Population variation revealed high-altitude adaptation of Tibetan mastiffs." Molecular biology and evolution 31.5 (2014): 1200-1205.
VillDog_China10	Illumina HiSeq 2000	12.4195	PRJNA233638	SAMN02585191	Li, Yan, et al. "Population variation revealed high-altitude adaptation of Tibetan mastiffs." Molecular biology and evolution 31.5 (2014): 1200-1205.
VillDog_China11	Illumina HiSeq 2000	17.925	PRJNA233638	SAMN02585192	Li, Yan, et al. "Population variation revealed high-altitude adaptation of Tibetan mastiffs." Molecular biology and evolution 31.5 (2014): 1200-1205.
VillDog_China12	Illumina HiSeq 2000	17.0508	PRJNA233638	SAMN02585193	Li, Yan, et al. "Population variation revealed high-altitude adaptation of Tibetan mastiffs." Molecular biology and evolution 31.5 (2014): 1200-1205.
VillDog_China13	Illumina HiSeq 2000	17.5151	PRJNA233638	SAMN02585194	Li, Yan, et al. "Population variation revealed high-altitude adaptation of Tibetan mastiffs." Molecular biology and evolution 31.5 (2014): 1200-1205.
VillDog_China14	Illumina HiSeq 2000	17.338	PRJNA233638	SAMN02585195	Li, Yan, et al. "Population variation revealed high-altitude adaptation of Tibetan mastiffs." Molecular biology and evolution 31.5 (2014): 1200-1205.
VillDog_China15	Illumina HiSeq 2000	16.8321	PRJNA233638	SAMN02585196	Li, Yan, et al. "Population variation revealed high-altitude adaptation of Tibetan mastiffs." Molecular biology and evolution 31.5 (2014): 1200-1205.
VillDog_China16	Illumina HiSeq 2000	18.8276	PRJNA233638	SAMN02585197	Li, Yan, et al. "Population variation revealed high-altitude adaptation of Tibetan mastiffs." Molecular biology and evolution 31.5 (2014): 1200-1205.
VillDog_China17	Illumina HiSeq 2000	14.9602	PRJNA233638	SAMN02585198	Li, Yan, et al. "Population variation revealed high-altitude adaptation of Tibetan mastiffs." Molecular biology and evolution 31.5 (2014): 1200-1205.
VillDog_China18	Illumina HiSeq 2000	15.2676	PRJNA233638	SAMN02585199	Li, Yan, et al. "Population variation revealed high-altitude adaptation of Tibetan mastiffs." Molecular biology and evolution 31.5 (2014): 1200-1205.
VillDog_China19	Illumina HiSeq 2000	17.9147	PRJNA233638	SAMN02585200	Li, Yan, et al. "Population variation revealed high-altitude adaptation of Tibetan mastiffs." Molecular biology and evolution 31.5 (2014): 1200-1205.
VillDog_China20	Illumina HiSeq 2000	17.4398	PRJNA233638	SAMN02585181	Li, Yan, et al. "Population variation revealed high-altitude adaptation of Tibetan mastiffs." Molecular biology and evolution 31.5 (2014): 1200-1205.
VillDog_China21	Illumina HiSeq 2000	15.5485	PRJNA233638	SAMN02585182	Li, Yan, et al. "Population variation revealed high-altitude adaptation of Tibetan mastiffs." Molecular biology and evolution 31.5 (2014): 1200-1205.
VillDog_China22	Illumina HiSeq 2000	15.2201	PRJNA233638	SAMN02585183	Li, Yan, et al. "Population variation revealed high-altitude adaptation of Tibetan mastiffs." Molecular biology and evolution 31.5 (2014): 1200-1205.
VillDog_China23	Illumina HiSeq 2000	15.4399	PRJNA233638	SAMN02585184	Li, Yan, et al. "Population variation revealed high-altitude adaptation of Tibetan mastiffs." Molecular biology and evolution 31.5 (2014): 1200-1205.
VillDog_China24	Illumina HiSeq 2000	14.9025	PRJNA233638	SAMN02585185	Li, Yan, et al. "Population variation revealed high-altitude adaptation of Tibetan mastiffs." Molecular biology and evolution 31.5 (2014): 1200-1205.
VillDog_China25	Illumina HiSeq 2000	15.8509	PRJNA233638	SAMN02585186	Li, Yan, et al. "Population variation revealed high-altitude adaptation of Tibetan mastiffs." Molecular biology and evolution 31.5 (2014): 1200-1205.
VillDog_China26	Illumina HiSeq 2000	15.6818	PRJNA233638	SAMN02585187	Li, Yan, et al. "Population variation revealed high-altitude adaptation of Tibetan mastiffs." Molecular biology and evolution 31.5 (2014): 1200-1205.
VillDog_China27	Illumina HiSeq 2000	16.0793	PRJNA233638	SAMN02585188	Li, Yan, et al. "Population variation revealed high-altitude adaptation of Tibetan mastiffs." Molecular biology and evolution 31.5 (2014): 1200-1205.
VillDog_China28	Illumina HiSeq 2000	16.0885	PRJNA233638	SAMN02585189	Li, Yan, et al. "Population variation revealed high-altitude adaptation of Tibetan mastiffs." Molecular biology and evolution 31.5 (2014): 1200-1205.
VillDog_China29	Illumina HiSeq 2000	16.8064	PRJNA233638	SAMN02585190	Li, Yan, et al. "Population variation revealed high-altitude adaptation of Tibetan mastiffs." Molecular biology and evolution 31.5 (2014): 1200-1205.
VillDog_China30	Illumina HiSeq 2000	17.3647	PRJNA233638	SAMN02585180	Li, Yan, et al. "Population variation revealed high-altitude adaptation of Tibetan mastiffs." Molecular biology and evolution 31.5 (2014): 1200-1205.
VillDog_China31	Illumina HiSeq 2000	17.3176	PRJNA233638	SAMN02585179	Li, Yan, et al. "Population variation revealed high-altitude adaptation of Tibetan mastiffs." Molecular biology and evolution 31.5 (2014): 1200-1205.
VillDog_China32	Illumina HiSeq 2000	16.5572	PRJNA233638	SAMN02585178	Li, Yan, et al. "Population variation revealed high-altitude adaptation of Tibetan mastiffs." Molecular biology and evolution 31.5 (2014): 1200-1205.
VillDog_China33	Illumina HiSeq 2000	14.8593	PRJNA233638	SAMN02585177	Li, Yan, et al. "Population variation revealed high-altitude adaptation of Tibetan mastiffs." Molecular biology and evolution 31.5 (2014): 1200-1205.
VillDog_China34	Illumina HiSeq 2000	15.8488	PRJNA233638	SAMN02585176	Li, Yan, et al. "Population variation revealed high-altitude adaptation of Tibetan mastiffs." Molecular biology and evolution 31.5 (2014): 1200-1205.
VillDog_China35	Illumina HiSeq 2000	16.344	PRJNA233638	SAMN02585175	Li, Yan, et al. "Population variation revealed high-altitude adaptation of Tibetan mastiffs." Molecular biology and evolution 31.5 (2014): 1200-1205.
VillDog_China36	Illumina HiSeq 2000	14.0133	PRJNA233638	SAMN02585174	Li, Yan, et al. "Population variation revealed high-altitude adaptation of Tibetan mastiffs." Molecular biology and evolution 31.5 (2014): 1200-1205.
VillDog_China37	Illumina HiSeq 2000	16.6088	PRJNA233638	SAMN02585173	Li, Yan, et al. "Population variation revealed high-altitude adaptation of Tibetan mastiffs." Molecular biology and evolution 31.5 (2014): 1200-1205.
VillDog_China38	Illumina HiSeq 2000	16.6147	PRJNA233638	SAMN02585172	Li, Yan, et al. "Population variation revealed high-altitude adaptation of Tibetan mastiffs." Molecular biology and evolution 31.5 (2014): 1200-1205.
VillDog_China39	Illumina HiSeq 2000	15.97	PRJNA233638	SAMN02585171	Li, Yan, et al. "Population variation revealed high-altitude adaptation of Tibetan mastiffs." Molecular biology and evolution 31.5 (2014): 1200-1205.
VillDog_China40	Illumina HiSeq 2000	17.2741	PRJNA233638	SAMN02585161	Li, Yan, et al. "Population variation revealed high-altitude adaptation of Tibetan mastiffs." Molecular biology and evolution 31.5 (2014): 1200-1205.
VillDog_China41	Illumina HiSeq 2000	17.9338	PRJNA233638	SAMN02585162	Li, Yan, et al. "Population variation revealed high-altitude adaptation of Tibetan mastiffs." Molecular biology and evolution 31.5 (2014): 1200-1205.
VillDog_China42	Illumina HiSeq 2000	15.6967	PRJNA233638	SAMN02585163	Li, Yan, et al. "Population variation revealed high-altitude adaptation of Tibetan mastiffs." Molecular biology and evolution 31.5 (2014): 1200-1205.
VillDog_China43	Illumina HiSeq 2000	16.3564	PRJNA233638	SAMN02585164	Li, Yan, et al. "Population variation revealed high-altitude adaptation of Tibetan mastiffs." Molecular biology and evolution 31.5 (2014): 1200-1205.
VillDog_China44	Illumina HiSeq 2000	17.1437	PRJNA233638	SAMN02585165	Li, Yan, et al. "Population variation revealed high-altitude adaptation of Tibetan mastiffs." Molecular biology and evolution 31.5 (2014): 1200-1205.
VillDog_China45	Illumina HiSeq 2000	14.3565	PRJNA233638	SAMN02585166	Li, Yan, et al. "Population variation revealed high-altitude adaptation of Tibetan mastiffs." Molecular biology and evolution 31.5 (2014): 1200-1205.
VillDog_China46	Illumina HiSeq 2000	17.5927	PRJNA233638	SAMN02585167	Li, Yan, et al. "Population variation revealed high-altitude adaptation of Tibetan mastiffs." Molecular biology and evolution 31.5 (2014): 1200-1205.
VillDog_China47	Illumina HiSeq 2000	13.7347	PRJNA233638	SAMN02585168	Li, Yan, et al. "Population variation revealed high-altitude adaptation of Tibetan mastiffs." Molecular biology and evolution 31.5 (2014): 1200-1205.
VillDog_China48	Illumina HiSeq 2000	15.512	PRJNA233638	SAMN02585169	Li, Yan, et al. "Population variation revealed high-altitude adaptation of Tibetan mastiffs." Molecular biology and evolution 31.5 (2014): 1200-1205.
VillDog_China49	Illumina HiSeq 2000	16.9919	PRJNA233638	SAMN02585170	Li, Yan, et al. "Population variation revealed high-altitude adaptation of Tibetan mastiffs." Molecular biology and evolution 31.5 (2014): 1200-1205.
AustralianTerrier01	Illumina HiSeq 2000	7.73363	PRJNA288568	SAMN03801643	This publication
Beagle01	Illumina HiSeq 2000	54.0129	PRJNA288568	SAMN03801644	This publication
Beagle04	Illumina HiSeq 2000	16.1101	PRJNA288568	SAMN03801645	This publication
BelgianSheepdog01	Illumina HiSeq 2000	58.0682	PRJNA288568	SAMN03801646	This publication
BelgianTurvuren01	Illumina HiSeq 2000	48.1218	PRJNA288568	SAMN03801647	This publication
BerneseMountainDog01	Illumina HiSeq 2000	51.1699	PRJNA288568	SAMN03801648	This publication
Bloodhound01	Illumina HiSeq 2000	51.8446	PRJNA288568	SAMN03801649	This publication
BorderCollie02	Illumina HiSeq 2000	20.0932	PRJNA288568	SAMN03801650	This publication
BorderCollie03	Illumina HiSeq 2000	30.1058	PRJNA288568	SAMN03801651	This publication
BorderCollie04	Illumina HiSeq 2000	10.4216	PRJNA288568	SAMN03801652	This publication
BrittanySpaniel01	Illumina HiSeq 2000	10.4826	PRJNA288568	SAMN03801653	This publication
Bulldog01	Illumina HiSeq 2000	53.9255	PRJNA288568	SAMN03801654	This publication
CavalierKCSpaniel01	Illumina HiSeq 2000	13.0741	PRJNA288568	SAMN03801655	This publication
Chihuahua01	Illumina HiSeq 2000	59.1786	PRJNA288568	SAMN03801656	This publication
ChowChow01	Illumina HiSeq 2000	6.01852	PRJNA288568	SAMN03801657	This publication
ChowChow02	Illumina HiSeq 2000	66.5328	PRJNA288568	SAMN03801658	This publication
ClumberSpaniel01	Illumina HiSeq 2000	19.3962	PRJNA288568	SAMN03801659	This publication
CockerSpaniel01	Illumina HiSeq 2000	55.2656	PRJNA288568	SAMN03801660	This publication
CockerSpaniel02	Illumina HiSeq 2000	20.9328	PRJNA288568	SAMN03801661	This publication
Doberman01	Illumina HiSeq 2000	33.6801	PRJNA288568	SAMN03801662	This publication
DogueDeBordeaux01	Illumina HiSeq 2000	7.75592	PRJNA288568	SAMN03801663	This publication
EnglishMastiff01	Illumina HiSeq 2000	76.0484	PRJNA288568	SAMN03801664	This publication
EnglishPointer01	Illumina HiSeq 2000	22.5308	PRJNA288568	SAMN03801665	This publication
FlatcoatedRetreiver01	Illumina HiSeq 2000	71.7133	PRJNA288568	SAMN03801666	This publication
FlatcoatedRetreiver02	Illumina HiSeq 2000	53.4619	PRJNA288568	SAMN03801667	This publication
GoldenRetreiver01	Illumina HiSeq 2000	46.3347	PRJNA288568	SAMN03801668	This publication
GreatDane01	Illumina HiSeq 2000	63.5183	PRJNA288568	SAMN03801669	This publication
GreatPyrenees01	Illumina HiSeq 2000	20.8088	PRJNA288568	SAMN03801670	This publication
GreyhoundRacing01	Illumina HiSeq 2000	18.7067	PRJNA288568	SAMN03801671	This publication
IrishWolfhound01	Illumina HiSeq 2000	51.735	PRJNA288568	SAMN03801672	This publication
ItalianGreyhound01	Illumina HiSeq 2000	28.273	PRJNA288568	SAMN03801673	This publication
ItalianGreyhound02	Illumina HiSeq 2000	32.4842	PRJNA288568	SAMN03801674	This publication
LabradorRetreiver04	Illumina HiSeq 2000	40.4504	PRJNA288568	SAMN03801675	This publication
Pekingese01	Illumina HiSeq 2000	64.6997	PRJNA288568	SAMN03801676	This publication
PortuguesePointer01	Illumina HiSeq 2000	11.2637	PRJNA288568	SAMN03801677	This publication
Pug01	Illumina HiSeq 2000	7.61183	PRJNA288568	SAMN03801678	This publication
Pug02	Illumina HiSeq 2001	7.26112	PRJNA288568	SAMN03801679	This publication
Pug03	Illumina HiSeq 2002	14.1433	PRJNA288568	SAMN03801680	This publication
Pug04	Illumina HiSeq 2003	11.5884	PRJNA288568	SAMN03801681	This publication
Pug05	Illumina HiSeq 2004	15.7319	PRJNA288568	SAMN03801682	This publication
RhodesianRidgeback01	Illumina HiSeq 2000	22.3444	PRJNA288568	SAMN03801683	This publication
Rottweiler01	Illumina HiSeq 2000	46.0663	PRJNA288568	SAMN03801684	This publication
SaintBernard01	Illumina HiSeq 2000	49.1313	PRJNA288568	SAMN03801685	This publication
Saluki01	Illumina HiSeq 2000	68.668	PRJNA288568	SAMN03801686	This publication
Saluki02	Illumina HiSeq 2000	22.9313	PRJNA288568	SAMN03801687	This publication
ScottishTerrier01	Illumina HiSeq 2000	54.2218	PRJNA288568	SAMN03801688	This publication
ShetlandSheepdog01	Illumina HiSeq 2000	52.617	PRJNA288568	SAMN03801689	This publication
SiberianHusky01	Illumina HiSeq 2000	66.4904	PRJNA288568	SAMN03801690	This publication
StandardPoodle01	Illumina HiSeq 2000	14.3243	PRJNA288568	SAMN03801691	This publication
ToyPoodle01	Illumina HiSeq 2000	57.3146	PRJNA288568	SAMN03801692	This publication
WestHighlandWhiteTerr01	Illumina HiSeq 2000	12.8433	PRJNA288568	SAMN03801693	This publication
Wolf08	Illumina HiSeq 2000	23.1061	PRJNA288568	SAMN03801694	This publication
AMAL_14509	Illumina CanineHD BeadChip	N/A	GSE70454	GSM1755109	This publication
AMAL_27127	Illumina CanineHD BeadChip	N/A	GSE70454	GSM1755110	This publication
AMAL_29540	Illumina CanineHD BeadChip	N/A	GSE70454	GSM1755111	This publication
AMAL_29541	Illumina CanineHD BeadChip	N/A	GSE70454	GSM1755112	This publication
AMAL_29542	Illumina CanineHD BeadChip	N/A	GSE70454	GSM1755113	This publication
AMAL_29543	Illumina CanineHD BeadChip	N/A	GSE70454	GSM1755114	This publication
AMAL_29544	Illumina CanineHD BeadChip	N/A	GSE70454	GSM1755115	This publication
AMAL_29545	Illumina CanineHD BeadChip	N/A	GSE70454	GSM1755116	This publication
AMAL_29546	Illumina CanineHD BeadChip	N/A	GSE70454	GSM1755117	This publication
AMAL_29547	Illumina CanineHD BeadChip	N/A	GSE70454	GSM1755118	This publication
HUSK_11480	Illumina CanineHD BeadChip	N/A	GSE70454	GSM1755119	This publication
HUSK_11487	Illumina CanineHD BeadChip	N/A	GSE70454	GSM1755120	This publication
HUSK_11490	Illumina CanineHD BeadChip	N/A	GSE70454	GSM1755121	This publication
HUSK_14529	Illumina CanineHD BeadChip	N/A	GSE70454	GSM1755122	This publication
HUSK_15872	Illumina CanineHD BeadChip	N/A	GSE70454	GSM1755123	This publication
HUSK_15873	Illumina CanineHD BeadChip	N/A	GSE70454	GSM1755124	This publication
HUSK_28487	Illumina CanineHD BeadChip	N/A	GSE70454	GSM1755125	This publication
HUSK_28925	Illumina CanineHD BeadChip	N/A	GSE70454	GSM1755126	This publication
HUSK_28926	Illumina CanineHD BeadChip	N/A	GSE70454	GSM1755127	This publication
HUSK_29464	Illumina CanineHD BeadChip	N/A	GSE70454	GSM1755128	This publication
GreenlandSledgeDog01	Illumina CanineHD BeadChip	N/A	N/A	N/A	Vaysse et al. "Identification of Genomic Regions Associated with Phenotypic Variation between Dog Breeds using Selection Mapping" PLoS Genet 7.10 (2011): e1002316.
GreenlandSledgeDog02	Illumina CanineHD BeadChip	N/A	N/A	N/A	Vaysse et al. "Identification of Genomic Regions Associated with Phenotypic Variation between Dog Breeds using Selection Mapping" PLoS Genet 7.10 (2011): e1002316.
GreenlandSledgeDog03	Illumina CanineHD BeadChip	N/A	N/A	N/A	Vaysse et al. "Identification of Genomic Regions Associated with Phenotypic Variation between Dog Breeds using Selection Mapping" PLoS Genet 7.10 (2011): e1002316.
GreenlandSledgeDog04	Illumina CanineHD BeadChip	N/A	N/A	N/A	Vaysse et al. "Identification of Genomic Regions Associated with Phenotypic Variation between Dog Breeds using Selection Mapping" PLoS Genet 7.10 (2011): e1002316.
GreenlandSledgeDog05	Illumina CanineHD BeadChip	N/A	N/A	N/A	Vaysse et al. "Identification of Genomic Regions Associated with Phenotypic Variation between Dog Breeds using Selection Mapping" PLoS Genet 7.10 (2011): e1002316.
GreenlandSledgeDog06	Illumina CanineHD BeadChip	N/A	N/A	N/A	Vaysse et al. "Identification of Genomic Regions Associated with Phenotypic Variation between Dog Breeds using Selection Mapping" PLoS Genet 7.10 (2011): e1002316.
GreenlandSledgeDog07	Illumina CanineHD BeadChip	N/A	N/A	N/A	Vaysse et al. "Identification of Genomic Regions Associated with Phenotypic Variation between Dog Breeds using Selection Mapping" PLoS Genet 7.10 (2011): e1002316.
GreenlandSledgeDog08	Illumina CanineHD BeadChip	N/A	N/A	N/A	Vaysse et al. "Identification of Genomic Regions Associated with Phenotypic Variation between Dog Breeds using Selection Mapping" PLoS Genet 7.10 (2011): e1002316.
GreenlandSledgeDog09	Illumina CanineHD BeadChip	N/A	N/A	N/A	Vaysse et al. "Identification of Genomic Regions Associated with Phenotypic Variation between Dog Breeds using Selection Mapping" PLoS Genet 7.10 (2011): e1002316.
GreenlandSledgeDog10	Illumina CanineHD BeadChip	N/A	N/A	N/A	Vaysse et al. "Identification of Genomic Regions Associated with Phenotypic Variation between Dog Breeds using Selection Mapping" PLoS Genet 7.10 (2011): e1002316.
																				Aug	31,	2015			approved		IDAT
																				Aug	31,	2015			approved		IDAT
																				Aug	31,	2015			approved		IDAT
																				Aug	31,	2015			approved		IDAT
																				Aug	31,	2015			approved		IDAT
																				Aug	31,	2015			approved		IDAT
																				Aug	31,	2015			approved		IDAT
																				Aug	31,	2015			approved		IDAT
																				Aug	31,	2015			approved		IDAT
																				Aug	31,	2015			approved		IDAT
																				Aug	31,	2015			approved		IDAT
																				Aug	31,	2015			approved		IDAT
																				Aug	31,	2015			approved		IDAT
																				Aug	31,	2015			approved		IDAT
																				Aug	31,	2015			approved		IDAT
																				Aug	31,	2015			approved		IDAT
																				Aug	31,	2015			approved		IDAT
																				Aug	31,	2015			approved		IDAT
																				Aug	31,	2015			approved		IDAT
																				Aug	31,	2015			approved		IDAT

## Sheet: Table S2
Table S2. High-quality, high-confidence, putative somatic, protein-changing variants that were found in both tumors.
Location	Allele	Gene	Feature	Feature_type	Consequence	cDNA_position	CDS_position	Protein_position	Amino_acids	Codons	Existing_variation	DISTANCE	STRAND	SYMBOL	SYMBOL_SOURCE	HGNC_ID	BIOTYPE	CANONICAL	SIFT
1:100075658	T	ENSCAFG00000028550	ENSCAFT00000043592	Transcript	missense_variant	2444	2444	815	P/L	cCc/cTc	-	-	1	-	-	-	protein_coding	YES	deleterious(0.04)
1:100350853	T	ENSCAFG00000031283	ENSCAFT00000046706	Transcript	missense_variant	914	574	192	H/Y	Cac/Tac	-	-	1	ZNF134	HGNC	HGNC:12918	protein_coding	YES	deleterious(0.03)
1:100438440	C	ENSCAFG00000029649	ENSCAFT00000044808	Transcript	missense_variant	157	157	53	T/A	Act/Gct	-	-	-1	-	-	-	protein_coding	YES	deleterious(0.01)
1:100552716-100552719	-	ENSCAFG00000023300	ENSCAFT00000011498	Transcript	inframe_deletion	9-11	9-11	3-4	AA/A	gcGGCc/gcc	-	-	-1	-	-	-	protein_coding	YES	-
1:101456900-101456902	-	ENSCAFG00000024289	ENSCAFT00000011556	Transcript	frameshift_variant,feature_truncation	1960-1961	1960-1961	654	-	-	-	-	-1	ZFP28	HGNC	HGNC:17801	protein_coding	YES	-
1:101745637	A	ENSCAFG00000024225	ENSCAFT00000003904	Transcript	missense_variant	1740	968	323	P/L	cCc/cTc	-	-	-1	ZNF444	HGNC	HGNC:16052	protein_coding	YES	deleterious(0.01)
1:101745646	A	ENSCAFG00000024225	ENSCAFT00000003904	Transcript	missense_variant	1731	959	320	P/L	cCg/cTg	-	-	-1	ZNF444	HGNC	HGNC:16052	protein_coding	YES	deleterious(0)
1:102059856	GGG	ENSCAFG00000002531	ENSCAFT00000003994	Transcript	inframe_insertion	1954-1955	1279-1280	427	R/PR	cgc/cCCCgc	-	-	-1	EPN1	HGNC	HGNC:21604	protein_coding	YES	-
1:102137761-102137767	-	ENSCAFG00000002561	ENSCAFT00000048613	Transcript	inframe_deletion	261-266	33-38	12-13	VPA/V	gtCCCTGCc/gtc	-	-	1	ZNF579	HGNC	HGNC:26646	protein_coding	-	-
1:102139639	A	ENSCAFG00000002561	ENSCAFT00000004042	Transcript	missense_variant	1040	1040	347	R/H	cGc/cAc	-	-	1	ZNF579	HGNC	HGNC:26646	protein_coding	YES	deleterious(0.05)
1:102181499	T	ENSCAFG00000031063	ENSCAFT00000045940	Transcript	stop_gained	1291	799	267	R/*	Cga/Tga	-	-	1	SBK3	HGNC	HGNC:44121	protein_coding	YES	-
1:102251333	C	ENSCAFG00000002580	ENSCAFT00000004061	Transcript	missense_variant	202	202	68	V/L	Gtc/Ctc	-	-	1	ISOC2	HGNC	HGNC:26278	protein_coding	YES	deleterious(0)
1:102283909	C	ENSCAFG00000029379	ENSCAFT00000045087	Transcript	frameshift_variant,feature_elongation	511-512	24-25	8-9	-	-	-	-	1	UBE2S	HGNC	HGNC:17895	protein_coding	YES	-
1:102335669	A	ENSCAFG00000002594	ENSCAFT00000004082	Transcript	stop_gained	1390	1390	464	R/*	Cga/Tga	-	-	-1	SUV420H2	HGNC	HGNC:28405	protein_coding	YES	-
1:102425023-102425065	-	ENSCAFG00000002608	ENSCAFT00000046834	Transcript	splice_acceptor_variant,coding_sequence_variant,intron_variant,feature_truncation	?-2847	?-1989	?-663	-	-	-	-	1	PPP6R1	HGNC	HGNC:29195	protein_coding	-	-
1:102425023-102425065	-	ENSCAFG00000002608	ENSCAFT00000004103	Transcript	splice_acceptor_variant,coding_sequence_variant,intron_variant,feature_truncation	?-1989	?-1989	?-663	-	-	-	-	1	PPP6R1	HGNC	HGNC:29195	protein_coding	YES	-
1:102463328	A	ENSCAFG00000002613	ENSCAFT00000036953	Transcript	missense_variant	1382	1132	378	D/N	Gac/Aac	-	-	1	SYT5	HGNC	HGNC:11513	protein_coding	YES	deleterious(0.01)
1:102526092	A	ENSCAFG00000002628	ENSCAFT00000004134	Transcript	missense_variant	554	101	34	S/L	tCg/tTg	-	-	-1	EPS8L1	HGNC	HGNC:21295	protein_coding	YES	deleterious(0.01)
1:102541855	A	ENSCAFG00000002635	ENSCAFT00000004142	Transcript	missense_variant	638	136	46	A/T	Gcc/Acc	-	-	1	RDH13	HGNC	HGNC:19978	protein_coding	YES	deleterious(0)
1:102592347	T	ENSCAFG00000031157	ENSCAFT00000046219	Transcript	missense_variant	496	353	118	S/L	tCa/tTa	-	-	1	GP6	HGNC	HGNC:14388	protein_coding	YES	deleterious(0.01)
1:102611834	T	ENSCAFG00000031157	ENSCAFT00000046219	Transcript	missense_variant	1080	937	313	L/F	Ctc/Ttc	-	-	1	GP6	HGNC	HGNC:14388	protein_coding	YES	deleterious(0.01)
1:102849953	A	ENSCAFG00000002649	ENSCAFT00000004175	Transcript	stop_gained	1436	1381	461	R/*	Cga/Tga	-	-	-1	LENG8	HGNC	HGNC:15500	protein_coding	YES	-
1:102869686	T	ENSCAFG00000002657	ENSCAFT00000004187	Transcript	missense_variant	478	478	160	E/K	Gag/Aag	-	-	-1	TTYH1	HGNC	HGNC:13476	protein_coding	YES	deleterious(0.01)
1:102974193	A	ENSCAFG00000029582	ENSCAFT00000004226	Transcript	missense_variant	997	997	333	P/T	Ccc/Acc	-	-	1	-	-	-	protein_coding	YES	deleterious(0)
1:102996882-102996884	-	ENSCAFG00000024425	ENSCAFT00000004158	Transcript	frameshift_variant,feature_truncation	908-909	830-831	277	-	-	-	-	-1	-	-	-	protein_coding	YES	-
1:103053267	C	ENSCAFG00000002694	ENSCAFT00000004257	Transcript	missense_variant	1948	1948	650	W/R	Tgg/Cgg	-	-	1	TMC4	HGNC	HGNC:22998	protein_coding	YES	deleterious(0)
1:103238288	A	ENSCAFG00000002704	ENSCAFT00000004269	Transcript	missense_variant	392	392	131	T/I	aCc/aTc	-	-	-1	CACNG6	HGNC	HGNC:13625	protein_coding	YES	deleterious(0)
1:103262841	T	ENSCAFG00000032667	ENSCAFT00000046946	Transcript	missense_variant	143	143	48	R/H	cGc/cAc	-	-	-1	CACNG8	HGNC	HGNC:13628	protein_coding	YES	deleterious(0)
1:104871403	A	ENSCAFG00000030568	ENSCAFT00000047925	Transcript	missense_variant	1645	1220	407	S/L	tCa/tTa	-	-	-1	-	-	-	protein_coding	YES	deleterious(0.01)
1:105382463-105382464	-	ENSCAFG00000002813	ENSCAFT00000004505	Transcript	frameshift_variant,feature_truncation	1214	802	268	-	-	-	-	1	HAS1	HGNC	HGNC:4818	protein_coding	YES	-
1:105886514	T	ENSCAFG00000002896	ENSCAFT00000037847	Transcript	missense_variant	1807	1807	603	A/S	Gcc/Tcc	-	-	1	KLK7	Uniprot_gn	-	protein_coding	YES	deleterious(0.04)
1:105904524	A	ENSCAFG00000002900	ENSCAFT00000037805	Transcript	splice_donor_variant	-	-	-	-	-	-	-	1	KLK6	HGNC	HGNC:6367	protein_coding	YES	-
1:105918165	A	ENSCAFG00000002902	ENSCAFT00000004639	Transcript	missense_variant	662	646	216	D/N	Gac/Aac	-	-	1	KLK5	Uniprot_gn	-	protein_coding	YES	deleterious(0.03)
1:105982753	C	ENSCAFG00000002907	ENSCAFT00000004655	Transcript	missense_variant	433	433	145	T/A	Aca/Gca	-	-	-1	-	-	-	protein_coding	YES	deleterious(0)
1:106027519	A	ENSCAFG00000002914	ENSCAFT00000004664	Transcript	missense_variant	2399	2399	800	G/E	gGa/gAa	-	-	1	KLK1	EntrezGene	-	protein_coding	YES	deleterious(0)
1:106128278	C	ENSCAFG00000002924	ENSCAFT00000004674	Transcript	missense_variant	6163	5869	1957	G/R	Gga/Cga	-	-	1	SHANK1	HGNC	HGNC:15474	protein_coding	YES	deleterious(0)
1:106227284	T	ENSCAFG00000002964	ENSCAFT00000004749	Transcript	missense_variant	1020	743	248	S/F	tCc/tTc	-	-	1	LRRC4B	HGNC	HGNC:25042	protein_coding	YES	deleterious(0.01)
1:106286263	A	ENSCAFG00000002982	ENSCAFT00000004782	Transcript	missense_variant	885	885	295	E/D	gaG/gaT	-	-	-1	MYBPC2	HGNC	HGNC:7550	protein_coding	YES	deleterious(0)
1:106297634	T	ENSCAFG00000030553	ENSCAFT00000004731	Transcript	missense_variant	624	433	145	E/K	Gaa/Aaa	-	-	-1	-	-	-	protein_coding	YES	deleterious(0)
1:106305480	C	ENSCAFG00000002937	ENSCAFT00000004726	Transcript	missense_variant	2632	2632	878	I/V	Atc/Gtc	-	-	-1	POLD1	HGNC	HGNC:9175	protein_coding	YES	deleterious(0.02)
1:106356894	A	ENSCAFG00000003342	ENSCAFT00000005351	Transcript	missense_variant	1099	562	188	G/S	Ggt/Agt	-	-	1	NAPSA	HGNC	HGNC:13395	protein_coding	YES	deleterious(0.04)
1:106372985	A	ENSCAFG00000003156	ENSCAFT00000005236	Transcript	missense_variant	5809	5809	1937	R/W	Cgg/Tgg	-	-	-1	MYH14	HGNC	HGNC:23212	protein_coding	YES	deleterious(0)
1:106414267	A	ENSCAFG00000003156	ENSCAFT00000005236	Transcript	missense_variant	2461	2461	821	R/C	Cgt/Tgt	-	-	-1	MYH14	HGNC	HGNC:23212	protein_coding	YES	deleterious(0.02)
1:106583478	A	ENSCAFG00000003420	ENSCAFT00000005506	Transcript	missense_variant	762	583	195	E/K	Gag/Aag	-	-	1	VRK3	HGNC	HGNC:18996	protein_coding	YES	deleterious(0)
1:107126757	C	ENSCAFG00000003698	ENSCAFT00000005954	Transcript	frameshift_variant,feature_elongation	799-800	799-800	267	-	-	-	-	1	TEAD2	HGNC	HGNC:11715	protein_coding	YES	-
1:107217992	G	ENSCAFG00000024128	ENSCAFT00000005985	Transcript	missense_variant	1379	1379	460	A/G	gCg/gGg	-	-	1	-	-	-	protein_coding	YES	deleterious(0.01)
1:107297073	A	ENSCAFG00000003746	ENSCAFT00000006046	Transcript	missense_variant	344	344	115	P/L	cCa/cTa	-	-	-1	TRPM4	HGNC	HGNC:17993	protein_coding	YES	deleterious(0)
1:107334376	A	ENSCAFG00000003834	ENSCAFT00000006169	Transcript	missense_variant	634	634	212	R/C	Cgc/Tgc	-	-	-1	LIN7B	HGNC	HGNC:17788	protein_coding	YES	deleterious(0)
1:107369735	T	ENSCAFG00000003836	ENSCAFT00000006172	Transcript	missense_variant	1108	1108	370	R/W	Cgg/Tgg	-	-	1	KCNA7	HGNC	HGNC:6226	protein_coding	YES	deleterious(0.02)
1:107594607	T	ENSCAFG00000003910	ENSCAFT00000006284	Transcript	missense_variant	2380	2380	794	R/W	Cgg/Tgg	-	-	1	RASIP1	HGNC	HGNC:24716	protein_coding	YES	deleterious(0.02)
1:107647961	A	ENSCAFG00000003938	ENSCAFT00000006331	Transcript	stop_gained	288	288	96	W/*	tgG/tgA	-	-	1	NTN5	HGNC	HGNC:25208	protein_coding	YES	-
1:107782863	A	ENSCAFG00000024497	ENSCAFT00000037810	Transcript	missense_variant	1008	796	266	G/R	Gga/Aga	-	-	1	LMTK3	HGNC	HGNC:19295	protein_coding	YES	deleterious(0)
1:107849758	T	ENSCAFG00000004014	ENSCAFT00000006426	Transcript	missense_variant	358	20	7	R/H	cGc/cAc	-	-	-1	GRIN2D	HGNC	HGNC:4588	protein_coding	YES	deleterious(0)
1:107900015-107900016	-	ENSCAFG00000004029	ENSCAFT00000006450	Transcript	frameshift_variant,feature_truncation	2111	1297	433	-	-	-	-	1	TMEM143	HGNC	HGNC:25603	protein_coding	YES	-
1:1079026	T	ENSCAFG00000000011	ENSCAFT00000000013	Transcript	missense_variant	1847	1847	616	G/E	gGa/gAa	-	-	-1	NFATC1	HGNC	HGNC:7775	protein_coding	YES	deleterious(0)
1:108163719	A	ENSCAFG00000004061	ENSCAFT00000037420	Transcript	missense_variant	515	515	172	C/F	tGc/tTc	-	-	-1	ELSPBP1	Uniprot_gn	-	protein_coding	YES	deleterious(0)
1:108480389	T	ENSCAFG00000004103	ENSCAFT00000045523	Transcript	missense_variant	1133	1133	378	P/L	cCg/cTg	-	-	1	ZNF541	HGNC	HGNC:25294	protein_coding	YES	deleterious(0.03)
1:108554867	A	ENSCAFG00000004140	ENSCAFT00000006648	Transcript	missense_variant	1424	1424	475	R/H	cGc/cAc	-	-	1	SLC8A2	HGNC	HGNC:11069	protein_coding	YES	deleterious(0)
1:108572196	T	ENSCAFG00000004140	ENSCAFT00000006648	Transcript	missense_variant	2626	2626	876	R/W	Cgg/Tgg	-	-	1	SLC8A2	HGNC	HGNC:11069	protein_coding	YES	deleterious(0.02)
1:108827643	A	ENSCAFG00000004180	ENSCAFT00000006707	Transcript	missense_variant	963	112	38	R/W	Cgg/Tgg	-	-	-1	SAE1	HGNC	HGNC:30660	protein_coding	YES	deleterious(0)
1:108853039	GGA	ENSCAFG00000004182	ENSCAFT00000006714	Transcript	inframe_insertion	2-3	2-3	1	M/ME	atg/atGGAg	-	-	1	ZC3H4	HGNC	HGNC:17808	protein_coding	YES	-
1:108870519	G	ENSCAFG00000004182	ENSCAFT00000006714	Transcript	missense_variant	215	215	72	T/S	aCc/aGc	-	-	1	ZC3H4	HGNC	HGNC:17808	protein_coding	YES	deleterious(0.01)
1:109254616	T	ENSCAFG00000030183	ENSCAFT00000048243	Transcript	missense_variant	502	502	168	R/C	Cgc/Tgc	-	-	1	DACT3	HGNC	HGNC:30745	protein_coding	YES	deleterious(0.04)
1:109404462	A	ENSCAFG00000004300	ENSCAFT00000006900	Transcript	missense_variant	967	967	323	P/S	Cct/Tct	-	-	-1	PNMAL1	HGNC	HGNC:25578	protein_coding	YES	deleterious(0.01)
1:109617289	T	ENSCAFG00000029461	ENSCAFT00000042940	Transcript	stop_gained	301	301	101	G/*	Gga/Tga	-	-	1	PGLYRP1	HGNC	HGNC:8904	protein_coding	YES	-
1:109682771	T	ENSCAFG00000004359	ENSCAFT00000006989	Transcript	missense_variant	1394	1378	460	P/S	Ccg/Tcg	-	-	1	NOVA2	HGNC	HGNC:7887	protein_coding	YES	deleterious(0.01)
1:109829525	T	ENSCAFG00000004392	ENSCAFT00000007064	Transcript	missense_variant	827	827	276	T/M	aCg/aTg	-	-	1	DMPK	HGNC	HGNC:2933	protein_coding	YES	deleterious(0)
1:109877062	T	ENSCAFG00000004395	ENSCAFT00000007068	Transcript	missense_variant	1069	1069	357	R/W	Cgg/Tgg	-	-	1	FBXO46	HGNC	HGNC:25069	protein_coding	YES	deleterious(0.01)
1:109972119	T	ENSCAFG00000004416	ENSCAFT00000007108	Transcript	missense_variant	848	848	283	P/L	cCc/cTc	-	-	1	GPR4	HGNC	HGNC:4497	protein_coding	YES	deleterious(0)
1:110193126	C	ENSCAFG00000004502	ENSCAFT00000007257	Transcript	missense_variant	1190	650	217	Y/C	tAc/tGc	-	-	-1	KLC3	HGNC	HGNC:20717	protein_coding	YES	deleterious(0.04)
1:110194693	T	ENSCAFG00000004502	ENSCAFT00000007257	Transcript	missense_variant	775	235	79	E/K	Gag/Aag	-	-	-1	KLC3	HGNC	HGNC:20717	protein_coding	YES	deleterious(0.01)
1:110223003	G	ENSCAFG00000004527	ENSCAFT00000007300	Transcript	missense_variant	2186	2186	729	F/S	tTc/tCc	-	-	-1	MARK4	HGNC	HGNC:13538	protein_coding	YES	deleterious(0)
1:110244396	C	ENSCAFG00000004527	ENSCAFT00000007300	Transcript	splice_donor_variant	-	-	-	-	-	-	-	-1	MARK4	HGNC	HGNC:13538	protein_coding	YES	-
1:110274974	C	ENSCAFG00000004534	ENSCAFT00000007307	Transcript	missense_variant	1199	1087	363	T/P	Acg/Ccg	-	-	1	EXOC3L2	HGNC	HGNC:30162	protein_coding	YES	deleterious(0)
1:110327334	T	ENSCAFG00000024085	ENSCAFT00000037289	Transcript	missense_variant	109	109	37	E/K	Gag/Aag	-	-	-1	BLOC1S3	HGNC	HGNC:20914	protein_coding	YES	deleterious(0)
1:110348744	A	ENSCAFG00000004558	ENSCAFT00000007333	Transcript	missense_variant	1450	1450	484	D/N	Gac/Aac	-	-	1	NKPD1	HGNC	HGNC:24739	protein_coding	YES	deleterious(0.03)
1:110424338-110424341	-	ENSCAFG00000004587	ENSCAFT00000007399	Transcript	splice_donor_variant,coding_sequence_variant,feature_truncation	492-?	463-?	155-?	-	-	-	-	-1	CLASRP	HGNC	HGNC:17731	protein_coding	YES	-
1:110477435-110477438	-	ENSCAFG00000004608	ENSCAFT00000045905	Transcript	inframe_deletion	782-784	782-784	261-262	PL/L	cCTCtg/ctg	-	-	-1	CLPTM1	HGNC	HGNC:2087	protein_coding	-	-
1:110477435-110477438	-	ENSCAFG00000004608	ENSCAFT00000007423	Transcript	inframe_deletion	782-784	782-784	261-262	PL/L	cCTCtg/ctg	-	-	-1	CLPTM1	HGNC	HGNC:2087	protein_coding	YES	-
1:110544471	A	ENSCAFG00000004626	ENSCAFT00000007452	Transcript	stop_gained	1504	1261	421	E/*	Gag/Tag	-	-	-1	PRR2	Uniprot_gn	-	protein_coding	YES	-
1:110709893-110709895	-	ENSCAFG00000004666	ENSCAFT00000007503	Transcript	frameshift_variant,feature_truncation	580-581	284-285	95	-	-	-	-	-1	PVR	HGNC	HGNC:9705	protein_coding	YES	-
1:1108049-1108101	-	ENSCAFG00000000011	ENSCAFT00000000013	Transcript	splice_acceptor_variant,coding_sequence_variant,intron_variant,feature_truncation	?-161	?-161	?-54	-	-	-	-	-1	NFATC1	HGNC	HGNC:7775	protein_coding	YES	-
1:1108049-1108101	-	ENSCAFG00000000011	ENSCAFT00000036234	Transcript	splice_acceptor_variant,coding_sequence_variant,intron_variant,feature_truncation	?-123	?-122	?-41	-	-	-	-	-1	NFATC1	HGNC	HGNC:7775	protein_coding	-	-
1:111433971	T	ENSCAFG00000004726	ENSCAFT00000007603	Transcript	missense_variant	1582	1444	482	R/W	Cgg/Tgg	-	-	1	SMG9	HGNC	HGNC:25763	protein_coding	YES	deleterious(0)
1:111508466-111508467	-	ENSCAFG00000031172	ENSCAFT00000044395	Transcript	frameshift_variant,feature_truncation	387	71	24	-	-	-	-	1	CADM4	HGNC	HGNC:30825	protein_coding	YES	-
1:111535891	A	ENSCAFG00000031996	ENSCAFT00000048661	Transcript	missense_variant	748	748	250	P/T	Cca/Aca	-	-	1	IRGQ	HGNC	HGNC:24868	protein_coding	YES	deleterious(0.01)
1:111638449-111638450	-	ENSCAFG00000004761	ENSCAFT00000007661	Transcript	frameshift_variant,feature_truncation	956	956	319	-	-	-	-	1	LYPD3	HGNC	HGNC:24880	protein_coding	YES	-
1:111908568	T	ENSCAFG00000014247	ENSCAFT00000007749	Transcript	missense_variant	932	932	311	T/I	aCc/aTc	-	-	1	CEACAM1	Uniprot_gn	-	protein_coding	YES	deleterious(0.03)
1:112001710	C	ENSCAFG00000004813	ENSCAFT00000007755	Transcript	missense_variant	2123	2123	708	H/P	cAc/cCc	-	-	1	HSL	Uniprot_gn	-	protein_coding	YES	deleterious(0.01)
1:112015585	A	ENSCAFG00000004814	ENSCAFT00000007759	Transcript	missense_variant	227	227	76	R/Q	cGg/cAg	-	-	1	CNFN	HGNC	HGNC:30183	protein_coding	YES	deleterious(0)
1:112039307	T	ENSCAFG00000004824	ENSCAFT00000007776	Transcript	missense_variant	3883	3883	1295	G/R	Ggg/Agg	-	-	-1	MEGF8	HGNC	HGNC:3233	protein_coding	YES	deleterious(0.01)
1:112086670-112086671	-	ENSCAFG00000004858	ENSCAFT00000007834	Transcript	frameshift_variant,feature_truncation	2183	2183	728	-	-	-	-	-1	CIC	HGNC	HGNC:14214	protein_coding	YES	-
1:112123797	C	ENSCAFG00000031552	ENSCAFT00000046422	Transcript	frameshift_variant,feature_elongation	1667-1668	1396-1397	466	-	-	-	-	1	ERF	HGNC	HGNC:3444	protein_coding	YES	-
1:112142954	A	ENSCAFG00000004891	ENSCAFT00000007866	Transcript	missense_variant	1138	1138	380	R/W	Cgg/Tgg	-	-	-1	ZNF526	HGNC	HGNC:29415	protein_coding	YES	deleterious(0)
1:112143116	A	ENSCAFG00000004891	ENSCAFT00000007866	Transcript	missense_variant	976	976	326	R/W	Cgg/Tgg	-	-	-1	ZNF526	HGNC	HGNC:29415	protein_coding	YES	deleterious(0)
1:112283171	A	ENSCAFG00000004930	ENSCAFT00000007929	Transcript	stop_gained	1017	1017	339	W/*	tgG/tgA	-	-	1	GRIK5	Uniprot_gn	-	protein_coding	YES	-
1:112581337	T	ENSCAFG00000005006	ENSCAFT00000008048	Transcript	missense_variant	850	850	284	G/S	Ggc/Agc	-	-	-1	-	-	-	protein_coding	YES	deleterious(0.03)
1:112822025	A	ENSCAFG00000005052	ENSCAFT00000036927	Transcript	missense_variant	542	502	168	G/R	Ggg/Agg	-	-	1	CYP2B6	EntrezGene	-	protein_coding	YES	deleterious(0)
1:112825405-112825406	-	ENSCAFG00000005052	ENSCAFT00000036927	Transcript	frameshift_variant,feature_truncation	871	831	277	-	-	-	-	1	CYP2B6	EntrezGene	-	protein_coding	YES	-
1:112903857	T	ENSCAFG00000031823	ENSCAFT00000008131	Transcript	stop_gained	681	661	221	E/*	Gaa/Taa	-	-	1	CYP2A13	Uniprot_gn	-	protein_coding	YES	-
1:112937751	T	ENSCAFG00000032339	ENSCAFT00000008163	Transcript	missense_variant	239	239	80	P/H	cCt/cAt	-	-	-1	CYP2A13	Uniprot_gn	-	protein_coding	YES	deleterious(0.01)
1:112938155	C	ENSCAFG00000032339	ENSCAFT00000008163	Transcript	frameshift_variant,feature_elongation	102-103	102-103	34-35	-	-	-	-	-1	CYP2A13	Uniprot_gn	-	protein_coding	YES	-
1:112975211	A	ENSCAFG00000023821	ENSCAFT00000008161	Transcript	missense_variant	250	250	84	V/M	Gtg/Atg	-	-	1	CYP2F1	HGNC	HGNC:2632	protein_coding	YES	deleterious(0.03)
1:113053702	T	ENSCAFG00000005104	ENSCAFT00000008198	Transcript	missense_variant	37	37	13	A/T	Gca/Aca	-	-	-1	ITPKC	HGNC	HGNC:14897	protein_coding	YES	deleterious(0)
1:113066015	A	ENSCAFG00000005108	ENSCAFT00000008218	Transcript	splice_donor_variant	-	-	-	-	-	-	-	1	ADCK4	HGNC	HGNC:19041	protein_coding	YES	-
1:113136307	A	ENSCAFG00000005133	ENSCAFT00000008264	Transcript	stop_gained	2353	2353	785	R/*	Cga/Tga	-	-	-1	LTBP4	HGNC	HGNC:6717	protein_coding	YES	-
1:113176790	T	ENSCAFG00000005286	ENSCAFT00000008586	Transcript	missense_variant	5752	5752	1918	E/K	Gag/Aag	-	-	-1	SPTBN4	HGNC	HGNC:14896	protein_coding	YES	deleterious(0)
1:113177791	A	ENSCAFG00000005286	ENSCAFT00000008586	Transcript	stop_gained	5569	5569	1857	R/*	Cga/Tga	-	-	-1	SPTBN4	HGNC	HGNC:14896	protein_coding	YES	-
1:113204467	A	ENSCAFG00000005286	ENSCAFT00000008586	Transcript	missense_variant	3257	3257	1086	A/V	gCc/gTc	-	-	-1	SPTBN4	HGNC	HGNC:14896	protein_coding	YES	deleterious(0.02)
1:113215866	T	ENSCAFG00000005286	ENSCAFT00000008586	Transcript	missense_variant	890	890	297	R/Q	cGg/cAg	-	-	-1	SPTBN4	HGNC	HGNC:14896	protein_coding	YES	deleterious(0)
1:113218214	A	ENSCAFG00000005286	ENSCAFT00000008586	Transcript	missense_variant	697	697	233	L/F	Ctc/Ttc	-	-	-1	SPTBN4	HGNC	HGNC:14896	protein_coding	YES	deleterious(0)
1:113290782	T	ENSCAFG00000005350	ENSCAFT00000008614	Transcript	stop_gained	1159	1159	387	R/*	Cga/Tga	-	-	1	PRX	HGNC	HGNC:13797	protein_coding	YES	-
1:113435635-113435636	-	ENSCAFG00000005393	ENSCAFT00000008670	Transcript	frameshift_variant,feature_truncation	21	21	7	-	-	-	-	-1	MAP3K10	HGNC	HGNC:6849	protein_coding	YES	-
1:113554496	A	ENSCAFG00000005398	ENSCAFT00000008685	Transcript	missense_variant	340	340	114	R/C	Cgc/Tgc	-	-	-1	PSMC4	HGNC	HGNC:9551	protein_coding	YES	deleterious(0.01)
1:113616208	T	ENSCAFG00000005406	ENSCAFT00000008689	Transcript	stop_gained	3927	3901	1301	Q/*	Cag/Tag	-	-	1	FCGBP	HGNC	HGNC:13572	protein_coding	YES	-
1:113652029	T	ENSCAFG00000005428	ENSCAFT00000008733	Transcript	missense_variant	2068	1903	635	R/C	Cgc/Tgc	-	-	1	DYRK1B	HGNC	HGNC:3092	protein_coding	YES	deleterious(0.01)
1:113745262	A	ENSCAFG00000005441	ENSCAFT00000008747	Transcript	missense_variant	233	233	78	A/V	gCc/gTc	-	-	-1	DLL3	HGNC	HGNC:2909	protein_coding	YES	deleterious(0.03)
1:114014160	T	ENSCAFG00000005606	ENSCAFT00000009039	Transcript	missense_variant	1730	1067	356	R/H	cGc/cAc	-	-	-1	PAK4	HGNC	HGNC:16059	protein_coding	YES	deleterious(0)
1:114297237	T	ENSCAFG00000005673	ENSCAFT00000009136	Transcript	stop_gained	428	409	137	Q/*	Caa/Taa	-	-	1	LGALS4	Uniprot_gn	-	protein_coding	YES	-
1:114376843	A	ENSCAFG00000005776	ENSCAFT00000009417	Transcript	missense_variant	619	619	207	P/S	Cca/Tca	-	-	-1	ACTN4	HGNC	HGNC:166	protein_coding	YES	deleterious(0)
1:114459269	A	ENSCAFG00000005874	ENSCAFT00000009482	Transcript	missense_variant	2378	2378	793	R/H	cGt/cAt	-	-	1	MAP4K1	HGNC	HGNC:6863	protein_coding	YES	deleterious(0.02)
1:114530695-114530698	-	ENSCAFG00000005896	ENSCAFT00000009509	Transcript	inframe_deletion	7240-7242	7240-7242	2414	E/-	GAG/-	-	-	-1	RYR1	HGNC	HGNC:10483	protein_coding	YES	-
1:114530695-114530698	-	ENSCAFG00000005896	ENSCAFT00000048904	Transcript	inframe_deletion	4468-4470	4468-4470	1490	E/-	GAG/-	-	-	-1	RYR1	HGNC	HGNC:10483	protein_coding	-	-
1:114530703-114530718	-	ENSCAFG00000005896	ENSCAFT00000009509	Transcript	inframe_deletion,splice_region_variant	7220-7234	7220-7234	2407-2412	FGEEPP/S	tTCGGTGAGGAGCCCCcg/tcg	-	-	-1	RYR1	HGNC	HGNC:10483	protein_coding	YES	-
1:114530703-114530718	-	ENSCAFG00000005896	ENSCAFT00000048904	Transcript	inframe_deletion,splice_region_variant	4448-4462	4448-4462	1483-1488	FGEEPP/S	tTCGGTGAGGAGCCCCcg/tcg	-	-	-1	RYR1	HGNC	HGNC:10483	protein_coding	-	-
1:114530720-114530724	-	ENSCAFG00000005896	ENSCAFT00000009509	Transcript	splice_acceptor_variant,intron_variant,feature_truncation	-	-	-	-	-	-	-	-1	RYR1	HGNC	HGNC:10483	protein_coding	YES	-
1:114530720-114530724	-	ENSCAFG00000005896	ENSCAFT00000048904	Transcript	splice_acceptor_variant,intron_variant,feature_truncation	-	-	-	-	-	-	-	-1	RYR1	HGNC	HGNC:10483	protein_coding	-	-
1:114549043-114549044	-	ENSCAFG00000005896	ENSCAFT00000009509	Transcript	frameshift_variant,feature_truncation	3931	3931	1311	-	-	-	-	-1	RYR1	HGNC	HGNC:10483	protein_coding	YES	-
1:114607081	A	ENSCAFG00000005920	ENSCAFT00000009549	Transcript	missense_variant	1243	1243	415	R/C	Cgc/Tgc	-	-	-1	SPRED3	HGNC	HGNC:31041	protein_coding	YES	deleterious(0)
1:114617670-114617683	-	ENSCAFG00000024052	ENSCAFT00000037250	Transcript	frameshift_variant,feature_truncation	1656-1668	1656-1668	552-556	-	-	-	-	1	GGN	HGNC	HGNC:18869	protein_coding	YES	-
1:114853113	A	ENSCAFG00000005973	ENSCAFT00000009650	Transcript	missense_variant	1676	1676	559	T/M	aCg/aTg	-	-	-1	SIPA1L3	HGNC	HGNC:23801	protein_coding	YES	deleterious(0.04)
1:115306042	G	ENSCAFG00000031993	ENSCAFT00000043908	Transcript	missense_variant	1856	1802	601	H/R	cAc/cGc	-	-	1	HKR1	HGNC	HGNC:4928	protein_coding	YES	deleterious(0)
1:115643569	T	ENSCAFG00000028601	ENSCAFT00000047998	Transcript	missense_variant	722	601	201	L/M	Ttg/Atg	-	-	-1	-	-	-	protein_coding	YES	deleterious(0)
1:115745736	T	ENSCAFG00000031804	ENSCAFT00000046617	Transcript	missense_variant	1578	1436	479	P/H	cCc/cAc	-	-	-1	ZNF571	HGNC	HGNC:25000	protein_coding	YES	deleterious(0)
1:116038577	A	ENSCAFG00000028475	ENSCAFT00000045420	Transcript	missense_variant	902	728	243	P/L	cCc/cTc	-	-	-1	ZFP82	HGNC	HGNC:28682	protein_coding	YES	deleterious(0.01)
1:1161740	A	ENSCAFG00000000012	ENSCAFT00000000014	Transcript	missense_variant	2266	2266	756	R/C	Cgc/Tgc	-	-	-1	ATP9B	HGNC	HGNC:13541	protein_coding	YES	deleterious(0)
1:116196829	T	ENSCAFG00000031624	ENSCAFT00000045339	Transcript	stop_gained	140	140	47	W/*	tGg/tAg	-	-	-1	ZNF529	HGNC	HGNC:29328	protein_coding	YES	-
1:116594720	A	ENSCAFG00000006621	ENSCAFT00000010711	Transcript	missense_variant	4319	4319	1440	A/V	gCc/gTc	-	-	-1	WDR62	HGNC	HGNC:24502	protein_coding	YES	deleterious(0)
1:116653296	G	ENSCAFG00000006649	ENSCAFT00000010717	Transcript	missense_variant	269	269	90	P/R	cCt/cGt	-	-	1	THAP8	HGNC	HGNC:23191	protein_coding	YES	deleterious(0.04)
1:116653789	A	ENSCAFG00000006649	ENSCAFT00000010717	Transcript	missense_variant	323	323	108	S/Y	tCt/tAt	-	-	1	THAP8	HGNC	HGNC:23191	protein_coding	YES	deleterious(0.04)
1:116869554	T	ENSCAFG00000006797	ENSCAFT00000010942	Transcript	missense_variant	1591	1591	531	E/K	Gag/Aag	-	-	-1	PROSER3	HGNC	HGNC:25204	protein_coding	YES	deleterious(0)
1:117116161	G	ENSCAFG00000006951	ENSCAFT00000046143	Transcript	missense_variant	3329	3132	1044	D/E	gaT/gaG	-	-	1	ATP4A	Uniprot_gn	-	protein_coding	YES	deleterious(0.04)
1:117120786	T	ENSCAFG00000006960	ENSCAFT00000011172	Transcript	splice_donor_variant	-	-	-	-	-	-	-	-1	TMEM147	HGNC	HGNC:30414	protein_coding	YES	-
1:117145597	A	ENSCAFG00000007024	ENSCAFT00000037708	Transcript	missense_variant	919	523	175	G/R	Gga/Aga	-	-	1	DMKN	HGNC	HGNC:25063	protein_coding	YES	deleterious(0.02)
1:117291317	A	ENSCAFG00000007041	ENSCAFT00000037622	Transcript	missense_variant	1505	1312	438	P/S	Ccg/Tcg	-	-	-1	MAG	HGNC	HGNC:6783	protein_coding	YES	deleterious(0.01)
1:117644322	A	ENSCAFG00000030117	ENSCAFT00000047558	Transcript	missense_variant	930	478	160	R/C	Cgt/Tgt	-	-	-1	ZNF599	HGNC	HGNC:26408	protein_coding	YES	deleterious(0.01)
1:117726320	A	ENSCAFG00000031202	ENSCAFT00000045447	Transcript	stop_gained	1299	1165	389	Q/*	Caa/Taa	-	-	-1	-	-	-	protein_coding	YES	-
1:118752178	A	ENSCAFG00000007377	ENSCAFT00000011842	Transcript	missense_variant	761	457	153	G/R	Ggg/Agg	-	-	1	PEPD	HGNC	HGNC:8840	protein_coding	YES	deleterious(0.02)
1:118778231	T	ENSCAFG00000007405	ENSCAFT00000011864	Transcript	missense_variant	437	437	146	G/E	gGa/gAa	-	-	-1	CEBPG	HGNC	HGNC:1837	protein_coding	YES	deleterious(0)
1:118978550	T	ENSCAFG00000007440	ENSCAFT00000011925	Transcript	stop_gained	1069	921	307	W/*	tgG/tgA	-	-	-1	WDR88	HGNC	HGNC:26999	protein_coding	YES	-
1:118985535	A	ENSCAFG00000007440	ENSCAFT00000011925	Transcript	missense_variant	888	740	247	S/F	tCc/tTc	-	-	-1	WDR88	HGNC	HGNC:26999	protein_coding	YES	deleterious(0.03)
1:119241029	A	ENSCAFG00000007505	ENSCAFT00000012020	Transcript	missense_variant	2714	2714	905	A/V	gCg/gTg	-	-	-1	TDRD12	HGNC	HGNC:25044	protein_coding	YES	deleterious(0)
1:119241032-119241033	-	ENSCAFG00000007505	ENSCAFT00000012020	Transcript	frameshift_variant,feature_truncation	2710	2710	904	-	-	-	-	-1	TDRD12	HGNC	HGNC:25044	protein_coding	YES	-
1:119242063	A	ENSCAFG00000007505	ENSCAFT00000012020	Transcript	missense_variant	2455	2455	819	L/F	Ctt/Ttt	-	-	-1	TDRD12	HGNC	HGNC:25044	protein_coding	YES	deleterious(0)
1:119481725	C	ENSCAFG00000007575	ENSCAFT00000012133	Transcript	missense_variant	941	941	314	A/G	gCa/gGa	-	-	-1	DPY19L3	HGNC	HGNC:27120	protein_coding	YES	deleterious(0.03)
1:120453171	A	ENSCAFG00000007592	ENSCAFT00000012149	Transcript	missense_variant	691	691	231	V/M	Gtg/Atg	-	-	1	TSHZ3	HGNC	HGNC:30700	protein_coding	YES	deleterious(0)
1:120453608	A	ENSCAFG00000007592	ENSCAFT00000012149	Transcript	stop_gained	1128	1128	376	W/*	tgG/tgA	-	-	1	TSHZ3	HGNC	HGNC:30700	protein_coding	YES	-
1:121559563	A	ENSCAFG00000007606	ENSCAFT00000012164	Transcript	missense_variant	319	319	107	R/W	Cgg/Tgg	-	-	-1	NNX3	Uniprot_gn	-	protein_coding	YES	deleterious(0)
1:121690133	T	ENSCAFG00000007614	ENSCAFT00000012181	Transcript	missense_variant	722	471	157	M/I	atG/atA	-	-	-1	CCNE1	HGNC	HGNC:1589	protein_coding	YES	deleterious(0.02)
1:121781383-121781391	-	ENSCAFG00000007627	ENSCAFT00000012193	Transcript	frameshift_variant,feature_truncation	642-649	642-649	214-217	-	-	-	-	-1	PLEKHF1	HGNC	HGNC:20764	protein_coding	YES	-
1:121781504-121781532	-	ENSCAFG00000007627	ENSCAFT00000012193	Transcript	frameshift_variant,feature_truncation	501-528	501-528	167-176	-	-	-	-	-1	PLEKHF1	HGNC	HGNC:20764	protein_coding	YES	-
1:121781536-121781538	-	ENSCAFG00000007627	ENSCAFT00000012193	Transcript	frameshift_variant,feature_truncation	495-496	495-496	165-166	-	-	-	-	-1	PLEKHF1	HGNC	HGNC:20764	protein_coding	YES	-
1:121781539-121781545	-	ENSCAFG00000007627	ENSCAFT00000012193	Transcript	inframe_deletion	488-493	488-493	163-165	QTR/R	cAGACGCgc/cgc	-	-	-1	PLEKHF1	HGNC	HGNC:20764	protein_coding	YES	-
1:121877269	T	ENSCAFG00000007631	ENSCAFT00000012197	Transcript	missense_variant	452	253	85	D/N	Gac/Aac	-	-	-1	VSTM2B	HGNC	HGNC:33595	protein_coding	YES	deleterious(0)
1:121877296	T	ENSCAFG00000007631	ENSCAFT00000012197	Transcript	missense_variant	425	226	76	E/K	Gag/Aag	-	-	-1	VSTM2B	HGNC	HGNC:33595	protein_coding	YES	deleterious(0)
1:13261143	A	ENSCAFG00000000059	ENSCAFT00000000083	Transcript	missense_variant	1144	946	316	R/C	Cgc/Tgc	-	-	-1	SERPINB2	HGNC	HGNC:8584	protein_coding	YES	deleterious(0.04)
1:13413338-13413339	-	ENSCAFG00000023362	ENSCAFT00000000084	Transcript	frameshift_variant,feature_truncation	1230	626	209	-	-	-	-	-1	SERPINB11	HGNC	HGNC:14221	protein_coding	YES	-
1:13493736	A	ENSCAFG00000023050	ENSCAFT00000000087	Transcript	missense_variant	1418	1262	421	S/F	tCc/tTc	-	-	-1	SERPINB13	HGNC	HGNC:8944	protein_coding	YES	deleterious(0.01)
1:13493904	A	ENSCAFG00000023050	ENSCAFT00000000087	Transcript	missense_variant	1250	1094	365	S/F	tCc/tTc	-	-	-1	SERPINB13	HGNC	HGNC:8944	protein_coding	YES	deleterious(0.01)
1:13523348	C	ENSCAFG00000023015	ENSCAFT00000000088	Transcript	missense_variant	449	449	150	Y/C	tAc/tGc	-	-	-1	SERPINB12	HGNC	HGNC:14220	protein_coding	YES	deleterious(0.01)
1:14986196-14986197	-	ENSCAFG00000032187	ENSCAFT00000049126	Transcript	frameshift_variant,feature_truncation	429	429	143	-	-	-	-	1	RNF152	HGNC	HGNC:26811	protein_coding	YES	-
1:17195721	T	ENSCAFG00000000103	ENSCAFT00000000162	Transcript	missense_variant	2513	2513	838	R/Q	cGg/cAg	-	-	-1	ZNF532	HGNC	HGNC:30940	protein_coding	YES	deleterious(0.01)
1:18239890	T	ENSCAFG00000000123	ENSCAFT00000000203	Transcript	missense_variant,splice_region_variant	988	625	209	P/S	Cca/Tca	-	-	1	ATP8B1	HGNC	HGNC:3706	protein_coding	YES	deleterious(0.02)
1:18440393	T	ENSCAFG00000000127	ENSCAFT00000000210	Transcript	missense_variant	766	703	235	V/M	Gtg/Atg	-	-	-1	ONECUT2	HGNC	HGNC:8139	protein_coding	YES	deleterious(0)
1:18485571	A	ENSCAFG00000000127	ENSCAFT00000000210	Transcript	frameshift_variant,feature_elongation	539-540	476-477	159	-	-	-	-	-1	ONECUT2	HGNC	HGNC:8139	protein_coding	YES	-
1:18485617	T	ENSCAFG00000000127	ENSCAFT00000000210	Transcript	missense_variant	494	431	144	R/H	cGc/cAc	-	-	-1	ONECUT2	HGNC	HGNC:8139	protein_coding	YES	deleterious(0)
1:19091579	T	ENSCAFG00000000133	ENSCAFT00000000221	Transcript	missense_variant	1628	1628	543	G/E	gGa/gAa	-	-	-1	WDR7	HGNC	HGNC:13490	protein_coding	YES	deleterious(0.03)
1:19120851	A	ENSCAFG00000000133	ENSCAFT00000000221	Transcript	missense_variant	704	704	235	S/F	tCc/tTc	-	-	-1	WDR7	HGNC	HGNC:13490	protein_coding	YES	deleterious(0.04)
1:20711003-20711006	-	ENSCAFG00000000145	ENSCAFT00000000237	Transcript	inframe_deletion	377-379	223-225	75	T/-	ACC/-	-	-	-1	RAB27B	HGNC	HGNC:9767	protein_coding	YES	-
1:20903475	T	ENSCAFG00000028993	ENSCAFT00000045996	Transcript	stop_gained	470	162	54	W/*	tgG/tgA	-	-	-1	-	-	-	protein_coding	YES	-
1:21182880	T	ENSCAFG00000000150	ENSCAFT00000000242	Transcript	missense_variant	349	349	117	D/N	Gat/Aat	-	-	-1	POLI	HGNC	HGNC:9182	protein_coding	YES	deleterious(0)
1:23829768	TTTTTTTATTTTATTTTATTTTATTTTATTTTATTTTTATTGGTGTTCAATTTACTAACA	ENSCAFG00000000162	ENSCAFT00000043498	Transcript	inframe_insertion	303-304	9-10	3-4	-/FFYFILFYFILFLLVFNLLT	-/TTTTTTTATTTTATTTTATTTTATTTTATTTTATTTTTATTGGTGTTCAATTTACTAACA	-	-	1	MEX3C	HGNC	HGNC:28040	protein_coding	-	-
1:23960938	A	ENSCAFG00000000166	ENSCAFT00000000268	Transcript	missense_variant	885	877	293	T/S	Aca/Tca	-	-	-1	ELAC1	HGNC	HGNC:14197	protein_coding	YES	deleterious(0.01)
1:25508734	A	ENSCAFG00000029442	ENSCAFT00000047691	Transcript	missense_variant	931	337	113	G/R	Gga/Aga	-	-	1	CTGF	HGNC	HGNC:2500	protein_coding	YES	deleterious(0.03)
1:26857279	C	ENSCAFG00000000205	ENSCAFT00000000328	Transcript	missense_variant	653	653	218	L/P	cTg/cCg	-	-	1	TCF21	HGNC	HGNC:11632	protein_coding	YES	deleterious(0)
1:26973973	T	ENSCAFG00000000212	ENSCAFT00000000338	Transcript	missense_variant	1856	1430	477	G/E	gGa/gAa	-	-	-1	SLC2A12	HGNC	HGNC:18067	protein_coding	YES	deleterious(0)
1:270562	A	ENSCAFG00000000001	ENSCAFT00000000001	Transcript	missense_variant	1577	1460	487	P/L	cCa/cTa	-	-	-1	ENPP1	HGNC	HGNC:3356	protein_coding	YES	deleterious(0)
1:28044939	A	ENSCAFG00000000234	ENSCAFT00000000373	Transcript	stop_gained	3290	3169	1057	G/*	Gga/Tga	-	-	-1	AHI1	HGNC	HGNC:21575	protein_coding	YES	-
1:28137209-28137211	-	ENSCAFG00000000234	ENSCAFT00000000373	Transcript	frameshift_variant,feature_truncation	2743-2744	2622-2623	874-875	-	-	-	-	-1	AHI1	HGNC	HGNC:21575	protein_coding	YES	-
1:28139117	A	ENSCAFG00000000234	ENSCAFT00000000373	Transcript	missense_variant	2604	2483	828	R/L	cGg/cTg	-	-	-1	AHI1	HGNC	HGNC:21575	protein_coding	YES	deleterious(0)
1:28833989	T	ENSCAFG00000000244	ENSCAFT00000000380	Transcript	missense_variant	829	829	277	D/N	Gat/Aat	-	-	-1	MTFR2	HGNC	HGNC:21115	protein_coding	YES	deleterious(0)
1:28948007	A	ENSCAFG00000000247	ENSCAFT00000000389	Transcript	missense_variant	1409	1409	470	T/M	aCg/aTg	-	-	-1	MAP7	HGNC	HGNC:6869	protein_coding	YES	deleterious(0)
1:28984877	A	ENSCAFG00000000247	ENSCAFT00000000389	Transcript	missense_variant	229	229	77	R/C	Cgt/Tgt	-	-	-1	MAP7	HGNC	HGNC:6869	protein_coding	YES	deleterious(0)
1:30251146	T	ENSCAFG00000000267	ENSCAFT00000000421	Transcript	missense_variant	698	73	25	T/S	Act/Tct	-	-	1	TNFAIP3	HGNC	HGNC:11896	protein_coding	YES	deleterious(0.05)
1:30258345	T	ENSCAFG00000000267	ENSCAFT00000000421	Transcript	missense_variant	1893	1268	423	S/F	tCc/tTc	-	-	1	TNFAIP3	HGNC	HGNC:11896	protein_coding	YES	deleterious(0.01)
1:30258765	T	ENSCAFG00000000267	ENSCAFT00000000421	Transcript	missense_variant	2313	1688	563	S/F	tCc/tTc	-	-	1	TNFAIP3	HGNC	HGNC:11896	protein_coding	YES	deleterious(0)
1:30607058	A	ENSCAFG00000000272	ENSCAFT00000000423	Transcript	stop_gained	2616	2616	872	W/*	tgG/tgA	-	-	1	KIAA1244	HGNC	HGNC:21213	protein_coding	YES	-
1:31052443	T	ENSCAFG00000000277	ENSCAFT00000000433	Transcript	missense_variant	749	749	250	S/F	tCc/tTc	-	-	1	CCDC28A	HGNC	HGNC:21098	protein_coding	YES	deleterious(0.01)
1:31524148	A	ENSCAFG00000000285	ENSCAFT00000000443	Transcript	missense_variant	473	473	158	P/L	cCc/cTc	-	-	-1	CITED2	HGNC	HGNC:1987	protein_coding	YES	deleterious(0)
1:3374196	T	ENSCAFG00000000019	ENSCAFT00000047374	Transcript	missense_variant	2969	2969	990	P/L	cCc/cTc	-	-	1	ZNF516	HGNC	HGNC:28990	protein_coding	YES	deleterious(0)
1:33854597	A	ENSCAFG00000000295	ENSCAFT00000000455	Transcript	missense_variant	615	395	132	G/E	gGa/gAa	-	-	1	VTA1	HGNC	HGNC:20954	protein_coding	YES	deleterious(0)
1:34098085	T	ENSCAFG00000000296	ENSCAFT00000000458	Transcript	missense_variant	3775	3403	1135	R/W	Cgg/Tgg	-	-	1	GPR126	HGNC	HGNC:13841	protein_coding	YES	deleterious(0.01)
1:34376098	A	ENSCAFG00000000300	ENSCAFT00000000460	Transcript	missense_variant	5894	5894	1965	P/L	cCa/cTa	-	-	-1	HIVEP2	Uniprot_gn	-	protein_coding	YES	deleterious(0)
1:34389660	T	ENSCAFG00000000300	ENSCAFT00000000460	Transcript	missense_variant	644	644	215	R/Q	cGg/cAg	-	-	-1	HIVEP2	Uniprot_gn	-	protein_coding	YES	deleterious(0)
1:34390000	A	ENSCAFG00000000300	ENSCAFT00000000460	Transcript	stop_gained	304	304	102	Q/*	Cag/Tag	-	-	-1	HIVEP2	Uniprot_gn	-	protein_coding	YES	-
1:35315136-35315139	-	ENSCAFG00000000312	ENSCAFT00000044951	Transcript	inframe_deletion	1581-1583	1417-1419	473	E/-	GAA/-	-	-	1	PHACTR2	HGNC	HGNC:20956	protein_coding	-	-
1:35315136-35315139	-	ENSCAFG00000000312	ENSCAFT00000000479	Transcript	inframe_deletion	1657-1659	1657-1659	553	E/-	GAA/-	-	-	1	PHACTR2	HGNC	HGNC:20956	protein_coding	YES	-
1:35373598-35373600	-	ENSCAFG00000000314	ENSCAFT00000000484	Transcript	frameshift_variant,stop_lost,feature_truncation	1423-1424	1423-1424	475	-	-	-	-	1	LTV1	HGNC	HGNC:21173	protein_coding	YES	-
1:35644005	C	ENSCAFG00000000322	ENSCAFT00000000493	Transcript	missense_variant	566	566	189	F/S	tTc/tCc	-	-	1	STX11	HGNC	HGNC:11429	protein_coding	YES	deleterious(0)
1:36210477	A	ENSCAFG00000000326	ENSCAFT00000047082	Transcript	missense_variant	2374	2374	792	E/K	Gaa/Aaa	-	-	1	UTRN	Uniprot_gn	-	protein_coding	YES	deleterious(0)
1:36870806	T	ENSCAFG00000000329	ENSCAFT00000035347	Transcript	missense_variant	1082	571	191	V/M	Gtg/Atg	-	-	-1	EPM2A	HGNC	HGNC:3413	protein_coding	YES	deleterious(0)
1:37015730	A	ENSCAFG00000000330	ENSCAFT00000000507	Transcript	missense_variant	1257	1257	419	M/I	atG/atT	-	-	-1	FBXO30	HGNC	HGNC:15600	protein_coding	YES	deleterious(0.03)
1:37114245	T	ENSCAFG00000000335	ENSCAFT00000000517	Transcript	missense_variant	4256	3982	1328	D/N	Gac/Aac	-	-	-1	SHPRH	HGNC	HGNC:19336	protein_coding	YES	deleterious(0.01)
1:37162864	G	ENSCAFG00000000335	ENSCAFT00000000517	Transcript	missense_variant	341	67	23	W/R	Tgg/Cgg	-	-	-1	SHPRH	HGNC	HGNC:19336	protein_coding	YES	deleterious(0)
1:37329112	A	ENSCAFG00000000338	ENSCAFT00000000528	Transcript	missense_variant	1816	908	303	G/D	gGc/gAc	-	-	1	GRM1	HGNC	HGNC:4593	protein_coding	YES	deleterious(0.04)
1:37564466	A	ENSCAFG00000000338	ENSCAFT00000000528	Transcript	missense_variant	3205	2297	766	G/E	gGa/gAa	-	-	1	GRM1	HGNC	HGNC:4593	protein_coding	YES	deleterious(0.03)
1:39455808	A	ENSCAFG00000000366	ENSCAFT00000000575	Transcript	missense_variant	1902	1799	600	G/D	gGt/gAt	-	-	1	SASH1	HGNC	HGNC:19182	protein_coding	YES	deleterious(0)
1:39817679	T	ENSCAFG00000000372	ENSCAFT00000000577	Transcript	missense_variant	1425	676	226	R/C	Cgc/Tgc	-	-	1	UST	HGNC	HGNC:17223	protein_coding	YES	deleterious(0.01)
1:39872857	A	ENSCAFG00000000372	ENSCAFT00000000577	Transcript	missense_variant	1605	856	286	E/K	Gaa/Aaa	-	-	1	UST	HGNC	HGNC:17223	protein_coding	YES	deleterious(0)
1:40255993	CGTTGACAAAGGAGAACATGAGCAGCCTCTGCTCGATGAACCACTTCC	ENSCAFG00000000375	ENSCAFT00000000588	Transcript	inframe_insertion	1105-1106	676-677	226	D/GKWFIEQRLLMFSFVND	gat/gGGAAGTGGTTCATCGAGCAGAGGCTGCTCATGTTCTCCTTTGTCAACGat	-	-	-1	ZC3H12D	HGNC	HGNC:21175	protein_coding	YES	-
1:41263691-41263700	-	ENSCAFG00000000405	ENSCAFT00000000638	Transcript	inframe_deletion	921-929	766-774	256-258	LLL/-	CTCCTTTTG/-	-	-	1	PLEKHG1	HGNC	HGNC:20884	protein_coding	YES	-
1:41267076	T	ENSCAFG00000000405	ENSCAFT00000000638	Transcript	missense_variant	1004	849	283	Q/H	caG/caT	-	-	1	PLEKHG1	HGNC	HGNC:20884	protein_coding	YES	deleterious(0.01)
1:41286728	A	ENSCAFG00000000405	ENSCAFT00000000638	Transcript	missense_variant	1689	1534	512	Q/K	Cag/Aag	-	-	1	PLEKHG1	HGNC	HGNC:20884	protein_coding	YES	deleterious(0.02)
1:41721707	A	ENSCAFG00000000422	ENSCAFT00000000667	Transcript	missense_variant	1059	1059	353	Q/H	caG/caT	-	-	-1	ZBTB2	HGNC	HGNC:20868	protein_coding	YES	deleterious(0.04)
1:41799651	A	ENSCAFG00000000423	ENSCAFT00000000670	Transcript	missense_variant	197	197	66	R/L	cGg/cTg	-	-	-1	RMND1	HGNC	HGNC:21176	protein_coding	YES	deleterious(0)
1:41808976	T	ENSCAFG00000000425	ENSCAFT00000000674	Transcript	stop_gained	547	547	183	R/*	Cga/Tga	-	-	1	C6orf211	HGNC	HGNC:17872	protein_coding	YES	-
1:4227092	A	ENSCAFG00000000020	ENSCAFT00000036397	Transcript	missense_variant	2343	2343	781	K/N	aaG/aaT	-	-	-1	TSHZ1	HGNC	HGNC:10669	protein_coding	YES	deleterious(0.01)
1:4228720	T	ENSCAFG00000000020	ENSCAFT00000036397	Transcript	missense_variant	715	715	239	A/T	Gcc/Acc	-	-	-1	TSHZ1	HGNC	HGNC:10669	protein_coding	YES	deleterious(0)
1:42359391	A	ENSCAFG00000000430	ENSCAFT00000000680	Transcript	missense_variant	2328	1484	495	G/D	gGc/gAc	-	-	1	ESR1	HGNC	HGNC:3467	protein_coding	YES	deleterious(0)
1:42417206	A	ENSCAFG00000000445	ENSCAFT00000000760	Transcript	stop_gained	23821	23821	7941	R/*	Cga/Tga	-	-	-1	SYNE1	HGNC	HGNC:17089	protein_coding	YES	-
1:42438520	A	ENSCAFG00000000445	ENSCAFT00000000760	Transcript	stop_gained	23425	23425	7809	R/*	Cga/Tga	-	-	-1	SYNE1	HGNC	HGNC:17089	protein_coding	YES	-
1:42687042	T	ENSCAFG00000000445	ENSCAFT00000000760	Transcript	splice_donor_variant	-	-	-	-	-	-	-	-1	SYNE1	HGNC	HGNC:17089	protein_coding	YES	-
1:42906278	T	ENSCAFG00000000535	ENSCAFT00000000829	Transcript	missense_variant	212	212	71	S/F	tCc/tTc	-	-	1	MYCT1	HGNC	HGNC:23172	protein_coding	YES	deleterious(0)
1:42948148	T	ENSCAFG00000000538	ENSCAFT00000000831	Transcript	missense_variant	521	487	163	D/Y	Gac/Tac	-	-	1	VIP	Uniprot_gn	-	protein_coding	YES	deleterious(0.01)
1:43139116	T	ENSCAFG00000000547	ENSCAFT00000000840	Transcript	missense_variant	955	955	319	E/K	Gaa/Aaa	-	-	-1	FBXO5	HGNC	HGNC:13584	protein_coding	YES	deleterious(0)
1:44600293	A	ENSCAFG00000000570	ENSCAFT00000000878	Transcript	missense_variant	218	173	58	G/E	gGa/gAa	-	-	1	KIAA1116	Uniprot_gn	-	protein_coding	YES	deleterious(0)
1:44624914	T	ENSCAFG00000000570	ENSCAFT00000000878	Transcript	missense_variant	1673	1628	543	A/V	gCt/gTt	-	-	1	KIAA1116	Uniprot_gn	-	protein_coding	YES	deleterious(0)
1:44932893	T	ENSCAFG00000000577	ENSCAFT00000000892	Transcript	stop_gained	1996	1447	483	G/*	Gga/Tga	-	-	1	TIAM2	HGNC	HGNC:11806	protein_coding	YES	-
1:44938712	C	ENSCAFG00000000577	ENSCAFT00000000892	Transcript	frameshift_variant,feature_elongation	2532-2533	1983-1984	661-662	-	-	-	-	1	TIAM2	HGNC	HGNC:11806	protein_coding	YES	-
1:44989892	T	ENSCAFG00000000577	ENSCAFT00000000892	Transcript	stop_gained	3184	2635	879	R/*	Cga/Tga	-	-	1	TIAM2	HGNC	HGNC:11806	protein_coding	YES	-
1:45018251	A	ENSCAFG00000000583	ENSCAFT00000000897	Transcript	missense_variant	157	157	53	D/N	Gac/Aac	-	-	1	CLDN20	HGNC	HGNC:2042	protein_coding	YES	deleterious(0)
1:45155395	T	ENSCAFG00000000589	ENSCAFT00000000923	Transcript	missense_variant	1207	1207	403	F/I	Ttt/Att	-	-	-1	NOX3	Uniprot_gn	-	protein_coding	YES	deleterious(0)
1:4586802	T	ENSCAFG00000000022	ENSCAFT00000000037	Transcript	missense_variant,splice_region_variant	5185	5129	1710	G/E	gGa/gAa	-	-	-1	ZNF407	HGNC	HGNC:19904	protein_coding	YES	deleterious(0)
1:47194912	A	ENSCAFG00000000618	ENSCAFT00000000958	Transcript	missense_variant	827	827	276	S/N	aGc/aAc	-	-	1	ZDHHC14	HGNC	HGNC:20341	protein_coding	YES	deleterious(0.02)
1:47424883	T	ENSCAFG00000000627	ENSCAFT00000000969	Transcript	missense_variant	817	817	273	P/S	Cct/Tct	-	-	1	SNX9	HGNC	HGNC:14973	protein_coding	YES	deleterious(0.01)
1:47577183-47577186	-	ENSCAFG00000000644	ENSCAFT00000000998	Transcript	inframe_deletion	3519-3521	3519-3521	1173-1174	GA/G	ggGGCg/ggg	-	-	1	SYNJ2	HGNC	HGNC:11504	protein_coding	YES	-
1:47577187	TT	ENSCAFG00000000644	ENSCAFT00000000998	Transcript	frameshift_variant,feature_elongation	3522-3523	3522-3523	1174-1175	-	-	-	-	1	SYNJ2	HGNC	HGNC:11504	protein_coding	YES	-
1:47947521	T	ENSCAFG00000000652	ENSCAFT00000001007	Transcript	missense_variant	2710	2710	904	R/W	Cgg/Tgg	-	-	1	TULP4	HGNC	HGNC:15530	protein_coding	YES	deleterious(0)
1:48385975	T	ENSCAFG00000000665	ENSCAFT00000001032	Transcript	missense_variant	723	723	241	M/I	atG/atA	-	-	-1	TAGAP	HGNC	HGNC:15669	protein_coding	YES	deleterious(0.02)
1:48555837	A	ENSCAFG00000000667	ENSCAFT00000001034	Transcript	missense_variant	664	664	222	D/N	Gat/Aat	-	-	1	FNDC1	HGNC	HGNC:21184	protein_coding	YES	deleterious(0.04)
1:48562726	A	ENSCAFG00000000667	ENSCAFT00000001034	Transcript	missense_variant	2323	2323	775	G/R	Ggg/Agg	-	-	1	FNDC1	HGNC	HGNC:21184	protein_coding	YES	deleterious(0.05)
1:49051760-49051761	-	ENSCAFG00000000740	ENSCAFT00000001145	Transcript	frameshift_variant,feature_truncation	882	648	216	-	-	-	-	1	PNLDC1	HGNC	HGNC:21185	protein_coding	YES	-
1:49240913	T	ENSCAFG00000000691	ENSCAFT00000049827	Transcript	missense_variant	5041	4916	1639	T/M	aCg/aTg	-	-	1	CI-MPR/IGF2R	Uniprot_gn	-	protein_coding	YES	deleterious(0.04)
1:4928184	A	ENSCAFG00000023363	ENSCAFT00000000040	Transcript	missense_variant	658	175	59	V/L	Gtg/Ttg	-	-	-1	CNDP2	HGNC	HGNC:24437	protein_coding	YES	deleterious(0.02)
1:49642915	T	ENSCAFG00000000760	ENSCAFT00000035541	Transcript	missense_variant	1180	1180	394	D/Y	Gac/Tac	-	-	1	MAP3K4	HGNC	HGNC:6856	protein_coding	YES	deleterious(0.02)
1:49643327	A	ENSCAFG00000000760	ENSCAFT00000035541	Transcript	missense_variant	1592	1592	531	R/H	cGt/cAt	-	-	1	MAP3K4	HGNC	HGNC:6856	protein_coding	YES	deleterious(0)
1:49686994	A	ENSCAFG00000000760	ENSCAFT00000035541	Transcript	missense_variant	3605	3605	1202	R/Q	cGg/cAg	-	-	1	MAP3K4	HGNC	HGNC:6856	protein_coding	YES	deleterious(0.01)
1:54500882	T	ENSCAFG00000000828	ENSCAFT00000001310	Transcript	missense_variant	431	328	110	A/T	Gca/Aca	-	-	-1	RPS6KA2	HGNC	HGNC:10431	protein_coding	YES	deleterious(0)
1:54958510	T	ENSCAFG00000030966	ENSCAFT00000046313	Transcript	missense_variant	900	476	159	S/F	tCc/tTc	-	-	1	-	-	-	protein_coding	YES	deleterious(0)
1:55018937	A	ENSCAFG00000000854	ENSCAFT00000013348	Transcript	missense_variant	1021	1021	341	E/K	Gaa/Aaa	-	-	1	-	-	-	protein_coding	YES	deleterious(0)
1:55517211	A	ENSCAFG00000000860	ENSCAFT00000001341	Transcript	missense_variant	4199	4199	1400	R/H	cGt/cAt	-	-	1	MLLT4	Uniprot_gn	-	protein_coding	YES	deleterious(0)
1:55529327	T	ENSCAFG00000000860	ENSCAFT00000001341	Transcript	missense_variant	4907	4907	1636	A/V	gCc/gTc	-	-	1	MLLT4	Uniprot_gn	-	protein_coding	YES	deleterious(0.01)
1:55579049	C	ENSCAFG00000000863	ENSCAFT00000001345	Transcript	missense_variant	911	911	304	R/T	aGg/aCg	-	-	1	KIF25	HGNC	HGNC:6390	protein_coding	YES	deleterious(0)
1:55585064	A	ENSCAFG00000000863	ENSCAFT00000001345	Transcript	missense_variant	1129	1129	377	D/N	Gac/Aac	-	-	1	KIF25	HGNC	HGNC:6390	protein_coding	YES	deleterious(0.01)
1:55728236	C	ENSCAFG00000000866	ENSCAFT00000001347	Transcript	missense_variant	884	884	295	L/R	cTc/cGc	-	-	-1	DACT2	HGNC	HGNC:21231	protein_coding	YES	deleterious(0)
1:56407026	T	ENSCAFG00000000874	ENSCAFT00000001365	Transcript	missense_variant	3067	3067	1023	D/N	Gat/Aat	-	-	-1	THBS2	EntrezGene	-	protein_coding	YES	deleterious(0)
1:56411166	A	ENSCAFG00000000874	ENSCAFT00000001365	Transcript	missense_variant	2372	2372	791	T/M	aCg/aTg	-	-	-1	THBS2	EntrezGene	-	protein_coding	YES	deleterious(0)
1:56425371	A	ENSCAFG00000000874	ENSCAFT00000001365	Transcript	missense_variant	328	328	110	R/W	Cgg/Tgg	-	-	-1	THBS2	EntrezGene	-	protein_coding	YES	deleterious(0)
1:56666500	T	ENSCAFG00000000884	ENSCAFT00000001375	Transcript	stop_gained	2216	2216	739	W/*	tGg/tAg	-	-	-1	WDR27	HGNC	HGNC:21248	protein_coding	YES	-
1:56860051	C	ENSCAFG00000000886	ENSCAFT00000001378	Transcript	missense_variant	1037	836	279	H/P	cAc/cCc	-	-	1	DSE	HGNC	HGNC:21144	protein_coding	YES	deleterious(0.01)
1:57283105	A	ENSCAFG00000000915	ENSCAFT00000001421	Transcript	missense_variant	1112	1112	371	R/Q	cGa/cAa	-	-	1	RFX6	HGNC	HGNC:21478	protein_coding	YES	deleterious(0.04)
1:57582178	T	ENSCAFG00000000923	ENSCAFT00000001427	Transcript	splice_acceptor_variant	-	-	-	-	-	-	-	-1	ROS1	Uniprot_gn	-	protein_coding	YES	-
1:57584244	C	ENSCAFG00000000923	ENSCAFT00000001427	Transcript	missense_variant	6396	5821	1941	T/A	Act/Gct	-	-	-1	ROS1	Uniprot_gn	-	protein_coding	YES	deleterious(0.01)
1:57610992	C	ENSCAFG00000000923	ENSCAFT00000001427	Transcript	missense_variant	3975	3400	1134	F/V	Ttt/Gtt	-	-	-1	ROS1	Uniprot_gn	-	protein_coding	YES	deleterious(0.01)
1:57639111-57639112	-	ENSCAFG00000000923	ENSCAFT00000001427	Transcript	frameshift_variant,feature_truncation	2341	1766	589	-	-	-	-	-1	ROS1	Uniprot_gn	-	protein_coding	YES	-
1:57653412	T	ENSCAFG00000000923	ENSCAFT00000001427	Transcript	stop_gained	958	383	128	W/*	tGg/tAg	-	-	-1	ROS1	Uniprot_gn	-	protein_coding	YES	-
1:58802328	T	ENSCAFG00000000938	ENSCAFT00000001448	Transcript	missense_variant	706	706	236	E/K	Gag/Aag	-	-	-1	MCM9	HGNC	HGNC:21484	protein_coding	YES	deleterious(0.02)
1:58838733	T	ENSCAFG00000000938	ENSCAFT00000001448	Transcript	missense_variant	363	363	121	M/I	atG/atA	-	-	-1	MCM9	HGNC	HGNC:21484	protein_coding	YES	deleterious(0.01)
1:58949360	A	ENSCAFG00000000942	ENSCAFT00000001463	Transcript	missense_variant	1810	1810	604	V/F	Gtt/Ttt	-	-	-1	FAM184A	Uniprot_gn	-	protein_coding	YES	deleterious(0.01)
1:59119334	A	ENSCAFG00000000945	ENSCAFT00000001467	Transcript	missense_variant	1507	1507	503	V/L	Gta/Tta	-	-	-1	MAN1A1	Uniprot_gn	-	protein_coding	YES	deleterious(0.03)
1:602730	A	ENSCAFG00000000007	ENSCAFT00000000008	Transcript	missense_variant	3697	2939	980	P/L	cCc/cTc	-	-	-1	ADNP2	HGNC	HGNC:23803	protein_coding	YES	deleterious(0.01)
1:60597487-60597492	-	ENSCAFG00000030746	ENSCAFT00000045887	Transcript	frameshift_variant,feature_truncation	1506-1510	633-637	211-213	-	-	-	-	-1	-	-	-	protein_coding	YES	-
1:60842388	A	ENSCAFG00000000955	ENSCAFT00000001480	Transcript	missense_variant	772	772	258	R/W	Cgg/Tgg	-	-	-1	TBC1D32	HGNC	HGNC:21485	protein_coding	YES	deleterious(0.01)
1:60942273	C	ENSCAFG00000000958	ENSCAFT00000001481	Transcript	missense_variant	486	486	162	K/N	aaG/aaC	-	-	1	GJA1	EntrezGene	-	protein_coding	YES	deleterious(0)
1:60942374	C	ENSCAFG00000000958	ENSCAFT00000001481	Transcript	missense_variant	587	587	196	V/A	gTa/gCa	-	-	1	GJA1	EntrezGene	-	protein_coding	YES	deleterious(0)
1:6123481	T	ENSCAFG00000000031	ENSCAFT00000000049	Transcript	stop_gained	582	232	78	Q/*	Cag/Tag	-	-	1	NETO1	HGNC	HGNC:13823	protein_coding	YES	-
1:61816609	G	ENSCAFG00000000989	ENSCAFT00000001532	Transcript	missense_variant	1225	1225	409	Y/H	Tac/Cac	-	-	-1	SERINC1	HGNC	HGNC:13464	protein_coding	YES	deleterious(0)
1:62098540	T	ENSCAFG00000001002	ENSCAFT00000043737	Transcript	missense_variant	303	303	101	K/N	aaA/aaT	-	-	1	SMPDL3A	HGNC	HGNC:17389	protein_coding	YES	deleterious(0.02)
1:6224546	T	ENSCAFG00000000031	ENSCAFT00000000049	Transcript	missense_variant	1680	1330	444	R/C	Cgc/Tgc	-	-	1	NETO1	HGNC	HGNC:13823	protein_coding	YES	deleterious(0)
1:62596451-62596452	-	ENSCAFG00000001016	ENSCAFT00000001569	Transcript	frameshift_variant,splice_region_variant,feature_truncation	1029	1029	343	-	-	-	-	-1	TRDN	EntrezGene	-	protein_coding	YES	-
1:64076854-64076866	-	ENSCAFG00000001028	ENSCAFT00000047585	Transcript	splice_acceptor_variant,coding_sequence_variant,intron_variant,feature_truncation	?-508	?-507	?-169	-	-	-	-	1	RNF217	HGNC	HGNC:21487	protein_coding	-	-
1:64076854-64076866	-	ENSCAFG00000001028	ENSCAFT00000001581	Transcript	splice_acceptor_variant,coding_sequence_variant,intron_variant,feature_truncation	?-411	?-411	?-137	-	-	-	-	1	RNF217	HGNC	HGNC:21487	protein_coding	YES	-
1:64762580	T	ENSCAFG00000001047	ENSCAFT00000001606	Transcript	missense_variant	893	830	277	S/F	tCc/tTc	-	-	1	NCOA7	HGNC	HGNC:21081	protein_coding	YES	deleterious(0)
1:66607988	A	ENSCAFG00000001101	ENSCAFT00000001683	Transcript	missense_variant	3591	3591	1197	M/I	atG/atT	-	-	-1	PTPRK	HGNC	HGNC:9674	protein_coding	YES	deleterious(0.01)
1:66608067	A	ENSCAFG00000001101	ENSCAFT00000001683	Transcript	missense_variant	3512	3512	1171	N/I	aAt/aTt	-	-	-1	PTPRK	HGNC	HGNC:9674	protein_coding	YES	deleterious(0)
1:66609474	T	ENSCAFG00000001101	ENSCAFT00000001683	Transcript	missense_variant	3230	3230	1077	G/E	gGa/gAa	-	-	-1	PTPRK	HGNC	HGNC:9674	protein_coding	YES	deleterious(0)
1:66722692	TATCTCAGCAATCTTTTTTTTTTTTTTT	ENSCAFG00000001101	ENSCAFT00000001683	Transcript	frameshift_variant,feature_elongation	1104-1105	1104-1105	368-369	-	-	-	-	-1	PTPRK	HGNC	HGNC:9674	protein_coding	YES	-
1:67645607	T	ENSCAFG00000001106	ENSCAFT00000036090	Transcript	stop_gained	139	139	47	R/*	Cga/Tga	-	-	1	LAMA2	Uniprot_gn	-	protein_coding	YES	-
1:67832890	T	ENSCAFG00000001106	ENSCAFT00000036090	Transcript	missense_variant	1735	1735	579	D/Y	Gat/Tat	-	-	1	LAMA2	Uniprot_gn	-	protein_coding	YES	deleterious(0.01)
1:67870566	A	ENSCAFG00000001106	ENSCAFT00000036090	Transcript	missense_variant	2447	2447	816	G/E	gGa/gAa	-	-	1	LAMA2	Uniprot_gn	-	protein_coding	YES	deleterious(0)
1:67894821	T	ENSCAFG00000001106	ENSCAFT00000036090	Transcript	missense_variant	3281	3281	1094	T/M	aCg/aTg	-	-	1	LAMA2	Uniprot_gn	-	protein_coding	YES	deleterious(0)
1:69131863	T	ENSCAFG00000001136	ENSCAFT00000001740	Transcript	missense_variant,splice_region_variant	3609	2683	895	A/T	Gcg/Acg	-	-	-1	EPB41L2	HGNC	HGNC:3379	protein_coding	YES	deleterious(0)
1:69167141	A	ENSCAFG00000001136	ENSCAFT00000001740	Transcript	missense_variant	2331	1405	469	A/S	Gca/Tca	-	-	-1	EPB41L2	HGNC	HGNC:3379	protein_coding	YES	deleterious(0)
1:69688044	CTATAAATG	ENSCAFG00000032104	ENSCAFT00000048993	Transcript	inframe_insertion	509-510	509-510	170	L/LYKC	ctc/ctCTATAAATGc	-	-	1	-	-	-	protein_coding	YES	-
1:69729685	T	ENSCAFG00000013574	ENSCAFT00000048432	Transcript	missense_variant	2105	2105	702	S/F	tCc/tTc	-	-	1	-	-	-	protein_coding	YES	deleterious(0.02)
1:70106311	T	ENSCAFG00000030584	ENSCAFT00000048479	Transcript	missense_variant	2270	1708	570	L/F	Ctc/Ttc	-	-	1	ZNF782	HGNC	HGNC:33110	protein_coding	YES	deleterious(0)
1:70482883	T	ENSCAFG00000001213	ENSCAFT00000046776	Transcript	stop_gained	856	856	286	Q/*	Cag/Tag	-	-	1	ZNF367	HGNC	HGNC:18320	protein_coding	YES	-
1:70508041	A	ENSCAFG00000001216	ENSCAFT00000001882	Transcript	missense_variant	371	371	124	S/N	aGt/aAt	-	-	1	SLC35D2	HGNC	HGNC:20799	protein_coding	YES	deleterious(0.01)
1:71305157-71305158	-	ENSCAFG00000001246	ENSCAFT00000001978	Transcript	frameshift_variant,feature_truncation	3847	3847	1283	-	-	-	-	1	PTCH1	Uniprot_gn	-	protein_coding	YES	-
1:71924876	T	ENSCAFG00000023549	ENSCAFT00000001995	Transcript	missense_variant	1336	1336	446	A/T	Gcc/Acc	-	-	-1	C9orf3	HGNC	HGNC:1361	protein_coding	YES	deleterious(0.05)
1:72142943	G	ENSCAFG00000023446	ENSCAFT00000048061	Transcript	missense_variant,splice_region_variant	383	383	128	D/G	gAc/gGc	-	-	1	FBP2	HGNC	HGNC:3607	protein_coding	YES	deleterious(0)
1:72280244	T	ENSCAFG00000001316	ENSCAFT00000002041	Transcript	missense_variant	4399	4289	1430	R/Q	cGg/cAg	-	-	-1	DAPK1	Uniprot_gn	-	protein_coding	YES	deleterious(0)
1:72328069	T	ENSCAFG00000001316	ENSCAFT00000002041	Transcript	missense_variant	748	638	213	G/E	gGa/gAa	-	-	-1	DAPK1	Uniprot_gn	-	protein_coding	YES	deleterious(0)
1:73407317	A	ENSCAFG00000001331	ENSCAFT00000002070	Transcript	missense_variant	548	548	183	R/Q	cGg/cAg	-	-	1	ZCCHC6	HGNC	HGNC:25817	protein_coding	YES	deleterious(0.01)
1:73614317	ATGTGGTGGTCTGCTTATTTGCTGTATCACAAGTTACTCCAAAA	ENSCAFG00000001350	ENSCAFT00000002093	Transcript	frameshift_variant,feature_elongation	266-267	246-247	82-83	-	-	-	-	1	GOLM1	HGNC	HGNC:15451	protein_coding	YES	-
1:73614317	ATGTGGTGGT	ENSCAFG00000001350	ENSCAFT00000002093	Transcript	frameshift_variant,feature_elongation	266-267	246-247	82-83	-	-	-	-	1	GOLM1	HGNC	HGNC:15451	protein_coding	YES	-
1:74510392-74510393	-	ENSCAFG00000001380	ENSCAFT00000002138	Transcript	frameshift_variant,feature_truncation	2660	1968	656	-	-	-	-	-1	NTRK2	Uniprot_gn	-	protein_coding	YES	-
1:74724621	T	ENSCAFG00000001380	ENSCAFT00000002138	Transcript	stop_gained	1595	903	301	W/*	tgG/tgA	-	-	-1	NTRK2	Uniprot_gn	-	protein_coding	YES	-
1:75797834	T	ENSCAFG00000001435	ENSCAFT00000002236	Transcript	missense_variant	883	883	295	P/S	Cca/Tca	-	-	1	UBQLN1	HGNC	HGNC:12508	protein_coding	YES	deleterious(0.01)
1:76449581	C	ENSCAFG00000001453	ENSCAFT00000002269	Transcript	frameshift_variant,feature_elongation	2464-2465	1747-1748	583	-	-	-	-	1	RASEF	HGNC	HGNC:26464	protein_coding	YES	-
1:79265512	A	ENSCAFG00000001534	ENSCAFT00000002416	Transcript	missense_variant	247	247	83	H/Y	Cac/Tac	-	-	-1	TLE4	HGNC	HGNC:11840	protein_coding	YES	deleterious(0)
1:81243774-81243777	-	ENSCAFG00000001617	ENSCAFT00000048812	Transcript	inframe_deletion	8304-8306	7624-7626	2542	I/-	ATT/-	-	-	-1	VPS13A	HGNC	HGNC:1908	protein_coding	-	-
1:81243774-81243777	-	ENSCAFG00000001617	ENSCAFT00000002558	Transcript	inframe_deletion	7459-7461	7459-7461	2487	I/-	ATT/-	-	-	-1	VPS13A	HGNC	HGNC:1908	protein_coding	YES	-
1:81274235	A	ENSCAFG00000001617	ENSCAFT00000002558	Transcript	stop_gained	5767	5767	1923	Q/*	Caa/Taa	-	-	-1	VPS13A	HGNC	HGNC:1908	protein_coding	YES	-
1:82417556	A	ENSCAFG00000001690	ENSCAFT00000002652	Transcript	missense_variant	220	220	74	P/S	Cca/Tca	-	-	-1	PCSK5	HGNC	HGNC:8747	protein_coding	YES	deleterious(0.02)
1:83354369	C	ENSCAFG00000001751	ENSCAFT00000002755	Transcript	missense_variant	1010	1010	337	L/P	cTa/cCa	-	-	1	TRPM6	HGNC	HGNC:17995	protein_coding	YES	deleterious(0)
1:83354438	A	ENSCAFG00000001751	ENSCAFT00000002755	Transcript	missense_variant	1079	1079	360	S/Y	tCc/tAc	-	-	1	TRPM6	HGNC	HGNC:17995	protein_coding	YES	deleterious(0)
1:83402188	G	ENSCAFG00000001751	ENSCAFT00000002755	Transcript	missense_variant	3566	3566	1189	L/R	cTg/cGg	-	-	1	TRPM6	HGNC	HGNC:17995	protein_coding	YES	deleterious(0)
1:83419267	T	ENSCAFG00000001751	ENSCAFT00000002755	Transcript	missense_variant	5176	5176	1726	L/F	Ctt/Ttt	-	-	1	TRPM6	HGNC	HGNC:17995	protein_coding	YES	deleterious(0)
1:84953591	AGGACAT	ENSCAFG00000001791	ENSCAFT00000002823	Transcript	splice_donor_variant,feature_elongation	-	-	-	-	-	-	-	1	ALDH1A1	HGNC	HGNC:402	protein_coding	-	-
1:84953591	AGGACAT	ENSCAFG00000001791	ENSCAFT00000044464	Transcript	splice_donor_variant,feature_elongation	-	-	-	-	-	-	-	1	ALDH1A1	HGNC	HGNC:402	protein_coding	-	-
1:84953591	AGGACAT	ENSCAFG00000001791	ENSCAFT00000050013	Transcript	splice_donor_variant,feature_elongation	-	-	-	-	-	-	-	1	ALDH1A1	HGNC	HGNC:402	protein_coding	YES	-
1:84989518	GGAGAA	ENSCAFG00000001791	ENSCAFT00000002823	Transcript	splice_donor_variant,feature_elongation	-	-	-	-	-	-	-	1	ALDH1A1	HGNC	HGNC:402	protein_coding	-	-
1:84989518	GGAGAA	ENSCAFG00000001791	ENSCAFT00000044464	Transcript	splice_donor_variant,feature_elongation	-	-	-	-	-	-	-	1	ALDH1A1	HGNC	HGNC:402	protein_coding	-	-
1:84989518	GGAGAA	ENSCAFG00000001791	ENSCAFT00000050013	Transcript	splice_donor_variant,feature_elongation	-	-	-	-	-	-	-	1	ALDH1A1	HGNC	HGNC:402	protein_coding	YES	-
1:85806383	T	ENSCAFG00000001820	ENSCAFT00000002861	Transcript	missense_variant	21	21	7	N/K	aaC/aaA	-	-	-1	C9orf85	HGNC	HGNC:28784	protein_coding	YES	deleterious(0)
1:85851810	T	ENSCAFG00000001821	ENSCAFT00000002865	Transcript	missense_variant	1062	67	23	A/S	Gct/Tct	-	-	1	ABHD17B	HGNC	HGNC:24278	protein_coding	YES	deleterious(0.03)
1:85967312	T	ENSCAFG00000001825	ENSCAFT00000002882	Transcript	missense_variant	1097	686	229	T/I	aCa/aTa	-	-	1	TMEM2	HGNC	HGNC:11869	protein_coding	YES	deleterious(0.04)
1:85973216	A	ENSCAFG00000001825	ENSCAFT00000002882	Transcript	missense_variant	1540	1129	377	A/T	Gct/Act	-	-	1	TMEM2	HGNC	HGNC:11869	protein_coding	YES	deleterious(0)
1:85999676	T	ENSCAFG00000001825	ENSCAFT00000002882	Transcript	missense_variant	3262	2851	951	H/Y	Cac/Tac	-	-	1	TMEM2	HGNC	HGNC:11869	protein_coding	YES	deleterious(0.01)
1:85999808	T	ENSCAFG00000001825	ENSCAFT00000002882	Transcript	stop_gained,splice_region_variant	3394	2983	995	Q/*	Cag/Tag	-	-	1	TMEM2	HGNC	HGNC:11869	protein_coding	YES	-
1:87916880	A	ENSCAFG00000001897	ENSCAFT00000002999	Transcript	missense_variant	520	520	174	V/M	Gtg/Atg	-	-	1	APBA1	HGNC	HGNC:578	protein_coding	YES	deleterious(0)
1:87917087	C	ENSCAFG00000001897	ENSCAFT00000002999	Transcript	missense_variant	727	727	243	Y/H	Tac/Cac	-	-	1	APBA1	HGNC	HGNC:578	protein_coding	YES	deleterious(0)
1:87917106-87917111	-	ENSCAFG00000001897	ENSCAFT00000002999	Transcript	frameshift_variant,feature_truncation	747-751	747-751	249-251	-	-	-	-	1	APBA1	HGNC	HGNC:578	protein_coding	YES	-
1:87917114	A	ENSCAFG00000001897	ENSCAFT00000002999	Transcript	missense_variant	754	754	252	D/N	Gac/Aac	-	-	1	APBA1	HGNC	HGNC:578	protein_coding	YES	deleterious(0)
1:87917538	C	ENSCAFG00000001897	ENSCAFT00000002999	Transcript	missense_variant	1178	1178	393	S/T	aGt/aCt	-	-	1	APBA1	HGNC	HGNC:578	protein_coding	YES	deleterious(0.01)
1:88497692	C	ENSCAFG00000001916	ENSCAFT00000003045	Transcript	missense_variant	176	176	59	V/G	gTg/gGg	-	-	-1	PIP5K1B	HGNC	HGNC:8995	protein_coding	YES	deleterious(0.01)
1:88586169-88586173	-	ENSCAFG00000001926	ENSCAFT00000003049	Transcript	frameshift_variant,feature_truncation	736-739	736-739	246-247	-	-	-	-	-1	FAM122A	HGNC	HGNC:23490	protein_coding	YES	-
1:88818056	C	ENSCAFG00000001927	ENSCAFT00000003050	Transcript	missense_variant	289	289	97	Y/H	Tac/Cac	-	-	1	TMEM252	HGNC	HGNC:28537	protein_coding	YES	deleterious(0)
1:893017	A	ENSCAFG00000000010	ENSCAFT00000000012	Transcript	stop_lost	2801	2801	934	*/L	tGa/tTa	-	-	-1	CTDP1	HGNC	HGNC:2498	protein_coding	YES	-
1:89303477	T	ENSCAFG00000001957	ENSCAFT00000003108	Transcript	missense_variant	3236	2486	829	A/V	gCc/gTc	-	-	1	DOCK8	HGNC	HGNC:19191	protein_coding	YES	deleterious(0.03)
1:89339980	T	ENSCAFG00000001957	ENSCAFT00000003108	Transcript	missense_variant	4418	3668	1223	A/V	gCc/gTc	-	-	1	DOCK8	HGNC	HGNC:19191	protein_coding	YES	deleterious(0.04)
1:89614745	A	ENSCAFG00000001974	ENSCAFT00000003130	Transcript	missense_variant	3878	3667	1223	A/T	Gcc/Acc	-	-	1	KANK1	HGNC	HGNC:19309	protein_coding	YES	deleterious(0)
1:89617029	A	ENSCAFG00000001974	ENSCAFT00000003130	Transcript	missense_variant	4166	3955	1319	V/I	Gtc/Atc	-	-	1	KANK1	HGNC	HGNC:19309	protein_coding	YES	deleterious(0.04)
1:90773518-90773519	-	ENSCAFG00000002013	ENSCAFT00000046362	Transcript	frameshift_variant,feature_truncation	2148	2148	716	-	-	-	-	1	SMARCA2	HGNC	HGNC:11098	protein_coding	YES	-
1:91261937	A	ENSCAFG00000002028	ENSCAFT00000037581	Transcript	missense_variant	805	805	269	D/N	Gac/Aac	-	-	1	VLDLR	Uniprot_gn	-	protein_coding	YES	deleterious(0)
1:91339010	A	ENSCAFG00000002032	ENSCAFT00000003213	Transcript	missense_variant	896	610	204	D/N	Gac/Aac	-	-	1	KCNV2	HGNC	HGNC:19698	protein_coding	YES	deleterious(0)
1:91395880	A	ENSCAFG00000002035	ENSCAFT00000003228	Transcript	missense_variant	1912	1775	592	S/F	tCc/tTc	-	-	-1	KIAA0020	HGNC	HGNC:29676	protein_coding	YES	deleterious(0)
1:91419561	T	ENSCAFG00000002035	ENSCAFT00000003228	Transcript	stop_gained,splice_region_variant	1171	1034	345	S/*	tCa/tAa	-	-	-1	KIAA0020	HGNC	HGNC:29676	protein_coding	YES	-
1:92344150	A	ENSCAFG00000031499	ENSCAFT00000045395	Transcript	missense_variant	2608	2000	667	S/F	tCc/tTc	-	-	-1	GLIS3	HGNC	HGNC:28510	protein_coding	YES	deleterious(0.03)
1:92572710	T	ENSCAFG00000031499	ENSCAFT00000045395	Transcript	missense_variant	1275	667	223	V/M	Gtg/Atg	-	-	-1	GLIS3	HGNC	HGNC:28510	protein_coding	YES	deleterious(0.03)
1:92976277	T	ENSCAFG00000002067	ENSCAFT00000003278	Transcript	missense_variant	1511	1505	502	S/F	tCc/tTc	-	-	1	SLC1A1	EntrezGene	-	protein_coding	YES	deleterious(0.01)
1:93037924	T	ENSCAFG00000002075	ENSCAFT00000003285	Transcript	missense_variant	673	673	225	P/S	Ccc/Tcc	-	-	1	PPAPDC2	HGNC	HGNC:23682	protein_coding	YES	deleterious(0)
1:93654663	T	ENSCAFG00000002121	ENSCAFT00000003348	Transcript	missense_variant	476	301	101	R/C	Cgt/Tgt	-	-	1	PDCD1LG2	HGNC	HGNC:18731	protein_coding	YES	deleterious(0.03)
1:93671402-93671406	-	ENSCAFG00000002121	ENSCAFT00000003348	Transcript	splice_donor_variant,coding_sequence_variant,feature_truncation	940-?	765-?	255-?	-	-	-	-	1	PDCD1LG2	HGNC	HGNC:18731	protein_coding	YES	-
1:93848021	A	ENSCAFG00000002131	ENSCAFT00000003361	Transcript	missense_variant	2539	2539	847	R/W	Cgg/Tgg	-	-	-1	ERMP1	HGNC	HGNC:23703	protein_coding	YES	deleterious(0.02)
1:94622960	A	ENSCAFG00000002155	ENSCAFT00000003391	Transcript	missense_variant	1052	1052	351	S/F	tCc/tTc	-	-	-1	-	-	-	protein_coding	YES	deleterious(0.01)
1:94916195	A	ENSCAFG00000002159	ENSCAFT00000003398	Transcript	missense_variant	2253	1712	571	S/F	tCc/tTc	-	-	-1	-	-	-	protein_coding	YES	deleterious(0.01)
1:95272086	T	ENSCAFG00000002163	ENSCAFT00000003401	Transcript	missense_variant	581	581	194	S/L	tCg/tTg	-	-	1	ROR2	HGNC	HGNC:10257	protein_coding	YES	deleterious(0)
1:95278916	T	ENSCAFG00000002163	ENSCAFT00000003401	Transcript	missense_variant	1724	1724	575	S/L	tCg/tTg	-	-	1	ROR2	HGNC	HGNC:10257	protein_coding	YES	deleterious(0)
1:95419837	T	ENSCAFG00000031694	ENSCAFT00000048299	Transcript	missense_variant	154	154	52	D/N	Gac/Aac	-	-	-1	RPS26	HGNC	HGNC:10414	protein_coding	YES	deleterious(0.02)
1:95955465	T	ENSCAFG00000002171	ENSCAFT00000003411	Transcript	missense_variant	70	70	24	A/T	Gcg/Acg	-	-	-1	SYK	Uniprot_gn	-	protein_coding	YES	deleterious(0)
1:96860063	A	ENSCAFG00000002180	ENSCAFT00000003433	Transcript	missense_variant	991	991	331	V/M	Gtg/Atg	-	-	1	SEMA4D	HGNC	HGNC:10732	protein_coding	YES	deleterious(0.01)
1:98288587	A	ENSCAFG00000002261	ENSCAFT00000003552	Transcript	missense_variant	1484	1304	435	P/L	cCg/cTg	-	-	-1	-	-	-	protein_coding	YES	deleterious(0.02)
1:98288619	T	ENSCAFG00000002261	ENSCAFT00000003552	Transcript	stop_gained	1452	1272	424	W/*	tgG/tgA	-	-	-1	-	-	-	protein_coding	YES	-
1:98460388	CCC	ENSCAFG00000002266	ENSCAFT00000042749	Transcript	inframe_insertion	2844-2845	2491-2492	831	A/GA	gcc/gGGGcc	-	-	-1	WNK2	HGNC	HGNC:14542	protein_coding	-	-
1:98460388	CCC	ENSCAFG00000002266	ENSCAFT00000003560	Transcript	inframe_insertion	5792-5793	5128-5129	1710	A/GA	gcc/gGGGcc	-	-	-1	WNK2	HGNC	HGNC:14542	protein_coding	YES	-
1:98850465-98850466	-	ENSCAFG00000002301	ENSCAFT00000003615	Transcript	frameshift_variant,feature_truncation	1393	922	308	-	-	-	-	1	ECM2	HGNC	HGNC:3154	protein_coding	YES	-
1:98850467	A	ENSCAFG00000002301	ENSCAFT00000003615	Transcript	missense_variant	1394	923	308	P/H	cCc/cAc	-	-	1	ECM2	HGNC	HGNC:3154	protein_coding	YES	deleterious(0)
1:99027850	C	ENSCAFG00000002324	ENSCAFT00000003644	Transcript	missense_variant	884	884	295	M/T	aTg/aCg	-	-	1	NOL8	HGNC	HGNC:23387	protein_coding	YES	deleterious(0.01)
1:99030545	G	ENSCAFG00000002324	ENSCAFT00000003644	Transcript	missense_variant	2366	2366	789	Q/R	cAa/cGa	-	-	1	NOL8	HGNC	HGNC:23387	protein_coding	YES	deleterious(0.01)
1:99062338	GGG	ENSCAFG00000002340	ENSCAFT00000003663	Transcript	inframe_insertion	522-523	512-513	171	L/LG	ctt/ctGGGt	-	-	1	IARS	HGNC	HGNC:5330	protein_coding	YES	-
1:99062341	TATTCTGTATGTTAGTAAATTGAACACCAATAAAAATAAAATAAAATAAAATAAA	ENSCAFG00000002340	ENSCAFT00000003663	Transcript	frameshift_variant,feature_elongation	525-526	515-516	172	-	-	-	-	1	IARS	HGNC	HGNC:5330	protein_coding	YES	-
1:99383376	T	ENSCAFG00000023653	ENSCAFT00000036493	Transcript	missense_variant	119	119	40	R/H	cGc/cAc	-	-	-1	CENPBD1	HGNC	HGNC:28272	protein_coding	YES	deleterious(0.02)
1:99430539-99430541	-	ENSCAFG00000002356	ENSCAFT00000003690	Transcript	frameshift_variant,feature_truncation	159-160	159-160	53-54	-	-	-	-	1	ZBTB45	HGNC	HGNC:23715	protein_coding	YES	-
1:99430797-99430803	-	ENSCAFG00000002356	ENSCAFT00000003690	Transcript	inframe_deletion	417-422	417-422	139-141	IAR/I	atTGCCCGt/att	-	-	1	ZBTB45	HGNC	HGNC:23715	protein_coding	YES	-
1:99433626	T	ENSCAFG00000002356	ENSCAFT00000003690	Transcript	missense_variant	1496	1496	499	T/M	aCg/aTg	-	-	1	ZBTB45	HGNC	HGNC:23715	protein_coding	YES	deleterious(0)
1:99451239	C	ENSCAFG00000002360	ENSCAFT00000003706	Transcript	missense_variant	997	997	333	P/A	Ccc/Gcc	-	-	-1	-	-	-	protein_coding	YES	deleterious(0)
1:99557237	C	ENSCAFG00000002363	ENSCAFT00000003708	Transcript	missense_variant	9	9	3	C/W	tgC/tgG	-	-	-1	-	-	-	protein_coding	YES	deleterious(0)
1:99558988	T	ENSCAFG00000002366	ENSCAFT00000003710	Transcript	missense_variant	527	526	176	E/K	Gag/Aag	-	-	-1	RPS5	HGNC	HGNC:10426	protein_coding	YES	deleterious(0.01)
1:99616484	A	ENSCAFG00000031654	ENSCAFT00000049294	Transcript	missense_variant	542	317	106	S/F	tCc/tTc	-	-	-1	ZSCAN22	HGNC	HGNC:4929	protein_coding	YES	deleterious(0.03)
1:99894630	A	ENSCAFG00000029776	ENSCAFT00000043129	Transcript	stop_gained	991	210	70	W/*	tgG/tgA	-	-	1	ZNF606	HGNC	HGNC:25879	protein_coding	YES	-
1:99906488	T	ENSCAFG00000029776	ENSCAFT00000043129	Transcript	missense_variant	1251	470	157	T/I	aCc/aTc	-	-	1	ZNF606	HGNC	HGNC:25879	protein_coding	YES	deleterious(0.04)
10:10487839	T	ENSCAFG00000000410	ENSCAFT00000000647	Transcript	missense_variant	467	467	156	G/E	gGa/gAa	-	-	-1	IL22	HGNC	HGNC:14900	protein_coding	YES	deleterious(0)
10:10524446	A	ENSCAFG00000000412	ENSCAFT00000000649	Transcript	missense_variant	2077	2077	693	R/C	Cgt/Tgt	-	-	-1	MDM1	HGNC	HGNC:29917	protein_coding	YES	deleterious(0.01)
10:10535503	A	ENSCAFG00000000412	ENSCAFT00000000649	Transcript	stop_gained	1036	1036	346	R/*	Cga/Tga	-	-	-1	MDM1	HGNC	HGNC:29917	protein_coding	YES	-
10:10867227	G	ENSCAFG00000000417	ENSCAFT00000000659	Transcript	missense_variant	1375	1148	383	L/R	cTg/cGg	-	-	1	NUP107	HGNC	HGNC:29914	protein_coding	YES	deleterious(0)
10:11551110	G	ENSCAFG00000000431	ENSCAFT00000000681	Transcript	missense_variant	1510	1510	504	T/A	Act/Gct	-	-	1	FRS2	HGNC	HGNC:16971	protein_coding	YES	deleterious(0)
10:11812866	A	ENSCAFG00000000439	ENSCAFT00000000698	Transcript	missense_variant	530	445	149	A/T	Gcc/Acc	-	-	1	MYRFL	HGNC	HGNC:26316	protein_coding	YES	deleterious(0.02)
10:1205480	A	ENSCAFG00000000159	ENSCAFT00000000256	Transcript	missense_variant	763	740	247	S/F	tCc/tTc	-	-	-1	TMEM194A	HGNC	HGNC:29001	protein_coding	YES	deleterious(0.03)
10:12165469	A	ENSCAFG00000000441	ENSCAFT00000000701	Transcript	splice_donor_variant	-	-	-	-	-	-	-	1	CNOT2	HGNC	HGNC:7878	protein_coding	YES	-
10:12302174	A	ENSCAFG00000000446	ENSCAFT00000000717	Transcript	missense_variant	4925	4925	1642	S/F	tCc/tTc	-	-	-1	PTPRB	HGNC	HGNC:9665	protein_coding	YES	deleterious(0)
10:12306633	G	ENSCAFG00000000446	ENSCAFT00000000717	Transcript	missense_variant	4616	4616	1539	G/A	gGt/gCt	-	-	-1	PTPRB	HGNC	HGNC:9665	protein_coding	YES	deleterious(0.02)
10:12333579	T	ENSCAFG00000000446	ENSCAFT00000000717	Transcript	missense_variant	2237	2237	746	G/E	gGa/gAa	-	-	-1	PTPRB	HGNC	HGNC:9665	protein_coding	YES	deleterious(0)
10:1313246	A	ENSCAFG00000000178	ENSCAFT00000000295	Transcript	missense_variant	5819	5819	1940	R/H	cGt/cAt	-	-	1	LRP1	HGNC	HGNC:6692	protein_coding	YES	deleterious(0)
10:1331061	G	ENSCAFG00000000178	ENSCAFT00000000295	Transcript	missense_variant	10585	10585	3529	N/D	Aac/Gac	-	-	1	LRP1	HGNC	HGNC:6692	protein_coding	YES	deleterious(0.01)
10:13410136	A	ENSCAFG00000000459	ENSCAFT00000000735	Transcript	missense_variant	1253	1253	418	G/D	gGc/gAc	-	-	1	TBC1D15	HGNC	HGNC:25694	protein_coding	YES	deleterious(0)
10:1352495	T	ENSCAFG00000029507	ENSCAFT00000046425	Transcript	missense_variant	62	62	21	S/F	tCc/tTc	-	-	1	NXPH4	HGNC	HGNC:8078	protein_coding	YES	deleterious(0)
10:1352788	A	ENSCAFG00000029507	ENSCAFT00000046425	Transcript	missense_variant	355	355	119	D/N	Gac/Aac	-	-	1	NXPH4	HGNC	HGNC:8078	protein_coding	YES	deleterious(0)
10:1358516	T	ENSCAFG00000000195	ENSCAFT00000000313	Transcript	stop_gained	315	211	71	Q/*	Cag/Tag	-	-	1	SHMT2	HGNC	HGNC:10852	protein_coding	YES	-
10:1399504	C	ENSCAFG00000000215	ENSCAFT00000000344	Transcript	missense_variant	1280	1280	427	P/R	cCc/cGc	-	-	-1	-	-	-	protein_coding	YES	deleterious(0)
10:1401905-1401906	-	ENSCAFG00000000215	ENSCAFT00000000344	Transcript	frameshift_variant,feature_truncation	940	940	314	-	-	-	-	-1	-	-	-	protein_coding	YES	-
10:1556444	A	ENSCAFG00000000194	ENSCAFT00000000305	Transcript	missense_variant	1653	965	322	R/H	cGc/cAc	-	-	1	INHBC	HGNC	HGNC:6068	protein_coding	YES	deleterious(0.03)
10:15818015	T	ENSCAFG00000000479	ENSCAFT00000000758	Transcript	missense_variant	64	64	22	Y/N	Tac/Aac	-	-	-1	KCNC2	HGNC	HGNC:6234	protein_coding	YES	deleterious(0)
10:15926117-15926118	-	ENSCAFG00000029990	ENSCAFT00000048594	Transcript	frameshift_variant,feature_truncation	355	355	119	-	-	-	-	1	GLIPR1L2	HGNC	HGNC:28592	protein_coding	YES	-
10:1593388	T	ENSCAFG00000000229	ENSCAFT00000000365	Transcript	missense_variant	1033	1033	345	R/C	Cgc/Tgc	-	-	1	MARS	HGNC	HGNC:6898	protein_coding	YES	deleterious(0)
10:16632298	A	ENSCAFG00000023004	ENSCAFT00000000865	Transcript	missense_variant	625	625	209	G/C	Ggt/Tgt	-	-	-1	-	-	-	protein_coding	YES	deleterious(0)
10:16712265	A	ENSCAFG00000000568	ENSCAFT00000000880	Transcript	missense_variant	14	14	5	A/V	gCg/gTg	-	-	-1	MAPK8IP2	HGNC	HGNC:6883	protein_coding	YES	deleterious(0)
10:16734862	T	ENSCAFG00000000579	ENSCAFT00000000894	Transcript	missense_variant	791	134	45	T/M	aCg/aTg	-	-	1	CHKB-CPT1B	HGNC	HGNC:41998	protein_coding	YES	deleterious(0.04)
10:16813718-16813725	-	ENSCAFG00000000561	ENSCAFT00000000869	Transcript	frameshift_variant,feature_truncation	800-806	800-806	267-269	-	-	-	-	-1	MIOX	HGNC	HGNC:14522	protein_coding	YES	-
10:16813864-16813865	-	ENSCAFG00000000561	ENSCAFT00000000869	Transcript	frameshift_variant,splice_region_variant,feature_truncation	747	747	249	-	-	-	-	-1	MIOX	HGNC	HGNC:14522	protein_coding	YES	-
10:16844475-16844478	-	ENSCAFG00000030366	ENSCAFT00000049380	Transcript	inframe_deletion	382-384	382-384	128	S/-	AGC/-	-	-	1	-	-	-	protein_coding	YES	-
10:16939907	T	ENSCAFG00000000629	ENSCAFT00000000971	Transcript	missense_variant	815	815	272	P/L	cCt/cTt	-	-	1	DENND6B	HGNC	HGNC:32690	protein_coding	YES	deleterious(0)
10:16964757	A	ENSCAFG00000000673	ENSCAFT00000001052	Transcript	missense_variant	1138	1138	380	G/R	Gga/Aga	-	-	1	PLXNB2	HGNC	HGNC:9104	protein_coding	YES	deleterious(0.05)
10:1697583	C	ENSCAFG00000000252	ENSCAFT00000000396	Transcript	missense_variant	130	130	44	S/P	Tct/Cct	-	-	1	SLC26A10	HGNC	HGNC:14470	protein_coding	YES	deleterious(0)
10:1698524	C	ENSCAFG00000000252	ENSCAFT00000000396	Transcript	missense_variant	443	443	148	V/A	gTg/gCg	-	-	1	SLC26A10	HGNC	HGNC:14470	protein_coding	YES	deleterious(0.04)
10:17025686	A	ENSCAFG00000000692	ENSCAFT00000001078	Transcript	missense_variant	1312	1312	438	R/W	Cgg/Tgg	-	-	-1	SELO	EntrezGene	-	protein_coding	YES	deleterious(0)
10:17032444	A	ENSCAFG00000000692	ENSCAFT00000001078	Transcript	missense_variant	259	259	87	R/W	Cgg/Tgg	-	-	-1	SELO	EntrezGene	-	protein_coding	YES	deleterious(0)
10:17195714-17195715	-	ENSCAFG00000000704	ENSCAFT00000001099	Transcript	frameshift_variant,feature_truncation	2280	1902	634	-	-	-	-	1	TTLL8	HGNC	HGNC:34000	protein_coding	YES	-
10:17300668	A	ENSCAFG00000000711	ENSCAFT00000001106	Transcript	missense_variant	1960	1411	471	P/T	Ccc/Acc	-	-	1	ALG12	HGNC	HGNC:19358	protein_coding	YES	deleterious(0.01)
10:17315640	T	ENSCAFG00000000714	ENSCAFT00000001110	Transcript	missense_variant	2873	2873	958	R/K	aGg/aAg	-	-	-1	ZBED4	HGNC	HGNC:20721	protein_coding	YES	deleterious(0.02)
10:17315794-17315797	-	ENSCAFG00000000714	ENSCAFT00000001110	Transcript	inframe_deletion	2716-2718	2716-2718	906	I/-	ATC/-	-	-	-1	ZBED4	HGNC	HGNC:20721	protein_coding	YES	-
10:17456131	T	ENSCAFG00000000727	ENSCAFT00000001131	Transcript	missense_variant	664	664	222	D/N	Gac/Aac	-	-	-1	-	-	-	protein_coding	YES	deleterious(0.02)
10:1810842-1810845	-	ENSCAFG00000000278	ENSCAFT00000000436	Transcript	inframe_deletion	264-266	256-258	86	L/-	CTT/-	-	-	1	SAS	Uniprot_gn	-	protein_coding	YES	-
10:1831424	T	ENSCAFG00000000290	ENSCAFT00000000448	Transcript	missense_variant	934	704	235	R/Q	cGg/cAg	-	-	-1	METTL1	HGNC	HGNC:7030	protein_coding	YES	deleterious(0.05)
10:1861734	A	ENSCAFG00000000297	ENSCAFT00000000466	Transcript	missense_variant	1961	1942	648	L/F	Ctt/Ttt	-	-	-1	AVIL	HGNC	HGNC:14188	protein_coding	YES	deleterious(0)
10:19592611	A	ENSCAFG00000000752	ENSCAFT00000001158	Transcript	missense_variant	829	829	277	E/K	Gag/Aag	-	-	1	CERK	HGNC	HGNC:19256	protein_coding	YES	deleterious(0)
10:19708239	A	ENSCAFG00000000767	ENSCAFT00000001204	Transcript	missense_variant	461	461	154	R/H	cGc/cAc	-	-	1	CELSR1	HGNC	HGNC:1850	protein_coding	YES	deleterious(0)
10:19798603	C	ENSCAFG00000000767	ENSCAFT00000001204	Transcript	missense_variant	4088	4088	1363	V/A	gTg/gCg	-	-	1	CELSR1	HGNC	HGNC:1850	protein_coding	YES	deleterious(0)
10:19918241	T	ENSCAFG00000000785	ENSCAFT00000001220	Transcript	missense_variant	3743	3743	1248	S/F	tCc/tTc	-	-	1	PKDREJ	HGNC	HGNC:9015	protein_coding	YES	deleterious(0.04)
10:19943289	C	ENSCAFG00000000788	ENSCAFT00000001222	Transcript	missense_variant	1305	1067	356	E/G	gAa/gGa	-	-	-1	PPARA	Uniprot_gn	-	protein_coding	YES	deleterious(0)
10:20160882	T	ENSCAFG00000000789	ENSCAFT00000036926	Transcript	missense_variant	245	245	82	A/V	gCg/gTg	-	-	1	WNT7B	HGNC	HGNC:12787	protein_coding	YES	deleterious(0)
10:20186312	T	ENSCAFG00000000789	ENSCAFT00000036926	Transcript	missense_variant	500	500	167	S/F	tCc/tTc	-	-	1	WNT7B	HGNC	HGNC:12787	protein_coding	YES	deleterious(0)
10:20558534	A	ENSCAFG00000000804	ENSCAFT00000001257	Transcript	stop_gained	268	268	90	Q/*	Caa/Taa	-	-	-1	FBLN1	HGNC	HGNC:3600	protein_coding	YES	-
10:20564589	T	ENSCAFG00000000804	ENSCAFT00000001257	Transcript	stop_gained	173	173	58	S/*	tCg/tAg	-	-	-1	FBLN1	HGNC	HGNC:3600	protein_coding	YES	-
10:20640748	T	ENSCAFG00000000827	ENSCAFT00000001296	Transcript	missense_variant	7	7	3	R/C	Cgc/Tgc	-	-	1	SMC1B	HGNC	HGNC:11112	protein_coding	YES	deleterious(0.05)
10:20680914-20680917	-	ENSCAFG00000000827	ENSCAFT00000001296	Transcript	inframe_deletion	2003-2005	2003-2005	668-669	EK/E	gAGAag/gag	-	-	1	SMC1B	HGNC	HGNC:11112	protein_coding	YES	-
10:20680914-20680917	-	ENSCAFG00000000827	ENSCAFT00000049571	Transcript	inframe_deletion	2673-2675	2003-2005	668-669	EK/E	gAGAag/gag	-	-	1	SMC1B	HGNC	HGNC:11112	protein_coding	-	-
10:21043937	T	ENSCAFG00000000861	ENSCAFT00000001343	Transcript	missense_variant	513	104	35	A/V	gCg/gTg	-	-	1	PHF21B	HGNC	HGNC:25161	protein_coding	YES	deleterious(0.04)
10:21468676-21468677	-	ENSCAFG00000000873	ENSCAFT00000001359	Transcript	frameshift_variant,feature_truncation	463	463	155	-	-	-	-	1	KIAA1644	HGNC	HGNC:29335	protein_coding	YES	-
10:216713	A	ENSCAFG00000000072	ENSCAFT00000000125	Transcript	missense_variant	347	262	88	V/M	Gtg/Atg	-	-	1	TMEM198	HGNC	HGNC:33704	protein_coding	YES	deleterious(0.01)
10:21722042	A	ENSCAFG00000000893	ENSCAFT00000001387	Transcript	missense_variant	247	94	32	R/C	Cgc/Tgc	-	-	-1	PNPLA3	HGNC	HGNC:18590	protein_coding	YES	deleterious(0)
10:21767230-21767232	-	ENSCAFG00000000895	ENSCAFT00000001391	Transcript	frameshift_variant,feature_truncation	1071-1072	871-872	291	-	-	-	-	1	PNPLA5	HGNC	HGNC:24888	protein_coding	YES	-
10:21896762	T	ENSCAFG00000000902	ENSCAFT00000035329	Transcript	frameshift_variant,feature_elongation	697-698	697-698	233	-	-	-	-	1	EFCAB6	HGNC	HGNC:24204	protein_coding	YES	-
10:23199690	T	ENSCAFG00000000978	ENSCAFT00000001514	Transcript	missense_variant	4918	4604	1535	P/L	cCa/cTa	-	-	1	TCF20	HGNC	HGNC:11631	protein_coding	YES	deleterious(0)
10:23373924	A	ENSCAFG00000000995	ENSCAFT00000001538	Transcript	missense_variant	2537	949	317	D/Y	Gac/Tac	-	-	-1	2014-09-03	HGNC	HGNC:10750	protein_coding	YES	deleterious(0)
10:23448420	C	ENSCAFG00000031269	ENSCAFT00000048929	Transcript	missense_variant	832	316	106	G/R	Ggc/Cgc	-	-	1	-	-	-	protein_coding	YES	deleterious(0.01)
10:23454783	A	ENSCAFG00000001013	ENSCAFT00000001559	Transcript	missense_variant	3007	3007	1003	R/W	Cgg/Tgg	-	-	-1	SREBF2	HGNC	HGNC:11290	protein_coding	YES	deleterious(0)
10:23474655	G	ENSCAFG00000001013	ENSCAFT00000001559	Transcript	missense_variant	1841	1841	614	I/T	aTc/aCc	-	-	-1	SREBF2	HGNC	HGNC:11290	protein_coding	YES	deleterious(0.02)
10:23480847	A	ENSCAFG00000001013	ENSCAFT00000001559	Transcript	missense_variant	1313	1313	438	S/F	tCc/tTc	-	-	-1	SREBF2	HGNC	HGNC:11290	protein_coding	YES	deleterious(0)
10:23532627	T	ENSCAFG00000001018	ENSCAFT00000001564	Transcript	missense_variant	359	359	120	R/H	cGc/cAc	-	-	-1	CCDC134	HGNC	HGNC:26185	protein_coding	YES	deleterious(0)
10:25284104	A	ENSCAFG00000001303	ENSCAFT00000002017	Transcript	missense_variant	1569	799	267	G/R	Ggg/Agg	-	-	1	ENTHD1	HGNC	HGNC:26352	protein_coding	YES	deleterious(0.01)
10:25381258	AT	ENSCAFG00000028726	ENSCAFT00000043183	Transcript	frameshift_variant,feature_elongation	4-5	4-5	2	-	-	-	-	1	-	-	-	protein_coding	YES	-
10:25970602	T	ENSCAFG00000001367	ENSCAFT00000002110	Transcript	missense_variant	355	355	119	L/F	Ctc/Ttc	-	-	1	NPTXR	HGNC	HGNC:7954	protein_coding	YES	deleterious(0)
10:26081074	T	ENSCAFG00000001377	ENSCAFT00000002126	Transcript	missense_variant	1843	1702	568	G/S	Ggc/Agc	-	-	-1	GTPBP1	HGNC	HGNC:4669	protein_coding	YES	deleterious(0)
10:26089302	T	ENSCAFG00000001377	ENSCAFT00000002126	Transcript	missense_variant	898	757	253	L/M	Ttg/Atg	-	-	-1	GTPBP1	HGNC	HGNC:4669	protein_coding	YES	deleterious(0)
10:26128239	T	ENSCAFG00000001384	ENSCAFT00000002133	Transcript	missense_variant	47	47	16	R/Q	cGg/cAg	-	-	-1	CBY1	HGNC	HGNC:1307	protein_coding	YES	deleterious(0.01)
10:26476971-26476974	-	ENSCAFG00000029842	ENSCAFT00000047372	Transcript	inframe_deletion	1347-1349	381-383	127-128	AA/A	gcAGCc/gcc	-	-	-1	MAFF	HGNC	HGNC:6780	protein_coding	YES	-
10:26476981-26476996	-	ENSCAFG00000029842	ENSCAFT00000047372	Transcript	inframe_deletion	1325-1339	359-373	120-125	SVAARG/W	tCCGTGGCCGCCCGCGgg/tgg	-	-	-1	MAFF	HGNC	HGNC:6780	protein_coding	YES	-
10:26476997	T	ENSCAFG00000029842	ENSCAFT00000047372	Transcript	frameshift_variant,feature_elongation	1323-1324	357-358	119-120	-	-	-	-	-1	MAFF	HGNC	HGNC:6780	protein_coding	YES	-
10:26477000-26477008	-	ENSCAFG00000029842	ENSCAFT00000047372	Transcript	frameshift_variant,feature_truncation	1313-1320	347-354	116-118	-	-	-	-	-1	MAFF	HGNC	HGNC:6780	protein_coding	YES	-
10:26477045-26477066	-	ENSCAFG00000029842	ENSCAFT00000047372	Transcript	inframe_deletion	1255-1275	289-309	97-103	NAAMRLE/-	AACGCAGCCATGCGCCTGGAG/-	-	-	-1	MAFF	HGNC	HGNC:6780	protein_coding	YES	-
10:26583092	A	ENSCAFG00000001427	ENSCAFT00000002222	Transcript	missense_variant	1096	1096	366	G/S	Ggc/Agc	-	-	1	BAIAP2L2	HGNC	HGNC:26203	protein_coding	YES	deleterious(0.02)
10:26583093	A	ENSCAFG00000001427	ENSCAFT00000002222	Transcript	missense_variant	1097	1097	366	G/D	gGc/gAc	-	-	1	BAIAP2L2	HGNC	HGNC:26203	protein_coding	YES	deleterious(0)
10:26695048	A	ENSCAFG00000001437	ENSCAFT00000002232	Transcript	missense_variant	319	319	107	R/C	Cgt/Tgt	-	-	-1	POLR2F	HGNC	HGNC:9193	protein_coding	YES	deleterious(0)
10:26725834	T	ENSCAFG00000001442	ENSCAFT00000002244	Transcript	missense_variant	1320	1319	440	R/H	cGc/cAc	-	-	-1	MICALL1	HGNC	HGNC:29804	protein_coding	YES	deleterious(0.03)
10:26815460	T	ENSCAFG00000001447	ENSCAFT00000002253	Transcript	missense_variant	595	595	199	V/M	Gtg/Atg	-	-	-1	GALR3	HGNC	HGNC:4134	protein_coding	YES	deleterious(0)
10:26815651	A	ENSCAFG00000001447	ENSCAFT00000002253	Transcript	missense_variant	404	404	135	T/M	aCg/aTg	-	-	-1	GALR3	HGNC	HGNC:4134	protein_coding	YES	deleterious(0)
10:26822141	A	ENSCAFG00000001456	ENSCAFT00000002278	Transcript	missense_variant	1034	923	308	K/M	aAg/aTg	-	-	-1	GCAT	HGNC	HGNC:4188	protein_coding	YES	deleterious(0.01)
10:26897952-26897953	-	ENSCAFG00000001480	ENSCAFT00000002299	Transcript	frameshift_variant,feature_truncation	2846	2719	907	-	-	-	-	-1	TRIOBP	HGNC	HGNC:17009	protein_coding	YES	-
10:26983779	C	ENSCAFG00000001496	ENSCAFT00000002334	Transcript	missense_variant	477	404	135	A/G	gCc/gGc	-	-	-1	GGA1	HGNC	HGNC:17842	protein_coding	YES	deleterious(0)
10:27070700	T	ENSCAFG00000001502	ENSCAFT00000002340	Transcript	missense_variant	1426	1426	476	R/W	Cgg/Tgg	-	-	1	CARD10	HGNC	HGNC:16422	protein_coding	YES	deleterious(0)
10:27329930	A	ENSCAFG00000001509	ENSCAFT00000002353	Transcript	missense_variant	757	757	253	E/K	Gag/Aag	-	-	1	SSTR3	Uniprot_gn	-	protein_coding	YES	deleterious(0)
10:27380710	T	ENSCAFG00000001511	ENSCAFT00000002356	Transcript	missense_variant	1005	646	216	G/C	Ggc/Tgc	-	-	1	IL2RB	HGNC	HGNC:6009	protein_coding	YES	deleterious(0.01)
10:27447699	A	ENSCAFG00000001513	ENSCAFT00000002360	Transcript	missense_variant	14	14	5	A/V	gCc/gTc	-	-	-1	KCTD17	HGNC	HGNC:25705	protein_coding	YES	deleterious(0)
10:278290	C	ENSCAFG00000000078	ENSCAFT00000000131	Transcript	missense_variant	632	403	135	D/H	Gac/Cac	-	-	1	DGKA	HGNC	HGNC:2849	protein_coding	YES	deleterious(0)
10:27899810	G	ENSCAFG00000001544	ENSCAFT00000002412	Transcript	missense_variant	878	868	290	T/A	Aca/Gca	-	-	1	EIF3D	HGNC	HGNC:3278	protein_coding	YES	deleterious(0.01)
10:27911620	T	ENSCAFG00000001550	ENSCAFT00000002422	Transcript	missense_variant	1515	906	302	K/N	aaG/aaT	-	-	1	FOXRED2	HGNC	HGNC:26264	protein_coding	YES	deleterious(0.02)
10:28114408-28114411	-	ENSCAFG00000001630	ENSCAFT00000002643	Transcript	inframe_deletion	4347-4349	4328-4330	1443-1444	QK/Q	cAGAag/cag	-	-	1	MYH9	EntrezGene	-	protein_coding	YES	-
10:28538767	C	ENSCAFG00000001704	ENSCAFT00000002667	Transcript	missense_variant	163	163	55	I/V	Atc/Gtc	-	-	-1	APOL6	HGNC	HGNC:14870	protein_coding	YES	deleterious(0.01)
10:30107728	T	ENSCAFG00000001740	ENSCAFT00000002732	Transcript	missense_variant	427	157	53	R/W	Cgg/Tgg	-	-	1	LARGE	HGNC	HGNC:6511	protein_coding	YES	deleterious(0.03)
10:30928605	T	ENSCAFG00000001758	ENSCAFT00000002753	Transcript	missense_variant	1328	1328	443	G/E	gGa/gAa	-	-	-1	FBXO7	HGNC	HGNC:13586	protein_coding	YES	deleterious(0.01)
10:31140336	T	ENSCAFG00000001767	ENSCAFT00000002779	Transcript	missense_variant	361	361	121	G/R	Gga/Aga	-	-	-1	PWP1	HGNC	HGNC:17015	protein_coding	YES	deleterious(0.02)
10:31477909	A	ENSCAFG00000001793	ENSCAFT00000002814	Transcript	missense_variant	512	512	171	S/F	tCc/tTc	-	-	-1	BTBD11	HGNC	HGNC:23844	protein_coding	YES	deleterious(0)
10:31764028	A	ENSCAFG00000001797	ENSCAFT00000002826	Transcript	stop_gained	290	290	97	S/*	tCa/tAa	-	-	1	CRY1	HGNC	HGNC:2384	protein_coding	YES	-
10:31793037-31793041	-	ENSCAFG00000001799	ENSCAFT00000002828	Transcript	frameshift_variant,feature_truncation	122-125	122-125	41-42	-	-	-	-	1	MTERFD3	HGNC	HGNC:30779	protein_coding	YES	-
10:31906753	T	ENSCAFG00000001805	ENSCAFT00000002839	Transcript	missense_variant	1408	1408	470	D/N	Gac/Aac	-	-	-1	RIC8B	HGNC	HGNC:25555	protein_coding	YES	deleterious(0.01)
10:32214301	C	ENSCAFG00000001851	ENSCAFT00000002941	Transcript	missense_variant	2980	2980	994	T/A	Aca/Gca	-	-	-1	POLR3B	HGNC	HGNC:30348	protein_coding	YES	deleterious(0)
10:32517020	T	ENSCAFG00000001879	ENSCAFT00000002976	Transcript	missense_variant	199	199	67	R/W	Cgg/Tgg	-	-	1	NUAK1	HGNC	HGNC:14311	protein_coding	YES	deleterious(0)
10:33226279	T	ENSCAFG00000001885	ENSCAFT00000002989	Transcript	missense_variant	790	790	264	P/S	Cca/Tca	-	-	1	APPL2	HGNC	HGNC:18242	protein_coding	YES	deleterious(0.02)
10:33240706	A	ENSCAFG00000001885	ENSCAFT00000002989	Transcript	missense_variant	1828	1828	610	G/R	Gga/Aga	-	-	1	APPL2	HGNC	HGNC:18242	protein_coding	YES	deleterious(0)
10:33248437	A	ENSCAFG00000001894	ENSCAFT00000003000	Transcript	missense_variant	3503	3503	1168	S/F	tCc/tTc	-	-	-1	KIAA1033	HGNC	HGNC:29174	protein_coding	YES	deleterious(0.03)
10:33359634	C	ENSCAFG00000001911	ENSCAFT00000003039	Transcript	missense_variant	2681	2506	836	F/L	Ttc/Ctc	-	-	1	ALDH1L2	HGNC	HGNC:26777	protein_coding	YES	deleterious(0)
10:3495322	A	ENSCAFG00000000316	ENSCAFT00000000487	Transcript	splice_acceptor_variant	-	-	-	-	-	-	-	1	SLC16A7	HGNC	HGNC:10928	protein_coding	YES	-
10:35075846-35075849	-	ENSCAFG00000001978	ENSCAFT00000003135	Transcript	inframe_deletion	927-929	167-169	56-57	FS/S	tTCTca/tca	-	-	-1	CCDC138	HGNC	HGNC:26531	protein_coding	-	-
10:35075846-35075849	-	ENSCAFG00000001978	ENSCAFT00000003134	Transcript	inframe_deletion	167-169	167-169	56-57	FS/S	tTCTca/tca	-	-	-1	CCDC138	HGNC	HGNC:26531	protein_coding	YES	-
10:35113213	A	ENSCAFG00000023061	ENSCAFT00000003160	Transcript	missense_variant	3206	2689	897	P/S	Ccc/Tcc	-	-	-1	RANBP2	HGNC	HGNC:9848	protein_coding	YES	deleterious(0.04)
10:35133731	A	ENSCAFG00000023061	ENSCAFT00000003160	Transcript	stop_gained	1316	799	267	Q/*	Cag/Tag	-	-	-1	RANBP2	HGNC	HGNC:9848	protein_coding	YES	-
10:35406465-35406469	-	ENSCAFG00000002025	ENSCAFT00000003208	Transcript	frameshift_variant,feature_truncation	3429-3432	3289-3292	1097-1098	-	-	-	-	-1	GCC2	HGNC	HGNC:23218	protein_coding	YES	-
10:35421030	G	ENSCAFG00000002025	ENSCAFT00000003208	Transcript	missense_variant	2050	1910	637	L/P	cTa/cCa	-	-	-1	GCC2	HGNC	HGNC:23218	protein_coding	YES	deleterious(0.01)
10:35422399	A	ENSCAFG00000002025	ENSCAFT00000003208	Transcript	stop_gained	681	541	181	K/*	Aaa/Taa	-	-	-1	GCC2	HGNC	HGNC:23218	protein_coding	YES	-
10:35563131-35563132	-	ENSCAFG00000002041	ENSCAFT00000003258	Transcript	frameshift_variant,feature_truncation	1006	917	306	-	-	-	-	-1	SULT1C2	HGNC	HGNC:11456	protein_coding	YES	-
10:35612185	T	ENSCAFG00000023398	ENSCAFT00000003261	Transcript	missense_variant	893	661	221	E/K	Gag/Aag	-	-	-1	SULT1C3	HGNC	HGNC:33543	protein_coding	YES	deleterious(0.03)
10:35901338	C	ENSCAFG00000002064	ENSCAFT00000003276	Transcript	missense_variant	407	385	129	L/V	Ctc/Gtc	-	-	-1	SLC5A7	HGNC	HGNC:14025	protein_coding	YES	deleterious(0.02)
10:36941482	T	ENSCAFG00000002080	ENSCAFT00000003291	Transcript	missense_variant	113	113	38	P/L	cCc/cTc	-	-	1	ST6GAL2	HGNC	HGNC:10861	protein_coding	YES	deleterious(0)
10:37426768	T	ENSCAFG00000002098	ENSCAFT00000003320	Transcript	missense_variant	396	163	55	E/K	Gag/Aag	-	-	-1	C2orf40	HGNC	HGNC:24642	protein_coding	YES	deleterious(0.02)
10:37602638	A	ENSCAFG00000002099	ENSCAFT00000003324	Transcript	missense_variant	847	847	283	R/C	Cgc/Tgc	-	-	-1	NCK2	HGNC	HGNC:7665	protein_coding	YES	deleterious(0)
10:38065048	A	ENSCAFG00000002105	ENSCAFT00000003334	Transcript	missense_variant	785	761	254	C/Y	tGc/tAc	-	-	1	FHL2	HGNC	HGNC:3703	protein_coding	YES	deleterious(0)
10:38082621	A	ENSCAFG00000002117	ENSCAFT00000003343	Transcript	stop_gained	610	610	204	R/*	Cga/Tga	-	-	-1	C2orf49	HGNC	HGNC:28772	protein_coding	YES	-
10:38119840	A	ENSCAFG00000002112	ENSCAFT00000003341	Transcript	missense_variant	494	116	39	V/E	gTg/gAg	-	-	1	TGFBRAP1	HGNC	HGNC:16836	protein_coding	YES	deleterious(0)
10:38390861	A	ENSCAFG00000005307	ENSCAFT00000029311	Transcript	missense_variant	295	295	99	A/T	Gcc/Acc	-	-	1	-	-	-	protein_coding	YES	deleterious(0.04)
10:40328016	A	ENSCAFG00000023596	ENSCAFT00000036376	Transcript	missense_variant	1407	1297	433	A/T	Gcc/Acc	-	-	1	MFSD9	HGNC	HGNC:28158	protein_coding	YES	deleterious(0)
10:40500697	A	ENSCAFG00000029466	ENSCAFT00000047526	Transcript	missense_variant	198	118	40	R/C	Cgc/Tgc	-	-	-1	-	-	-	protein_coding	YES	deleterious(0)
10:40974859-40974864	-	ENSCAFG00000002152	ENSCAFT00000003386	Transcript	frameshift_variant,feature_truncation	968-972	770-774	257-258	-	-	-	-	-1	IL1R2	HGNC	HGNC:5994	protein_coding	YES	-
10:41097973-41097978	-	ENSCAFG00000002162	ENSCAFT00000048277	Transcript	frameshift_variant,feature_truncation	3158-3162	3158-3162	1053-1054	-	-	-	-	-1	MAP4K4	HGNC	HGNC:6866	protein_coding	YES	-
10:41633901	T	ENSCAFG00000002193	ENSCAFT00000003449	Transcript	missense_variant	112	89	30	H/L	cAt/cTt	-	-	1	RNF149	HGNC	HGNC:23137	protein_coding	YES	deleterious(0.02)
10:41861075	G	ENSCAFG00000002223	ENSCAFT00000047996	Transcript	missense_variant	1506	1506	502	E/D	gaG/gaC	-	-	-1	NPAS2	HGNC	HGNC:7895	protein_coding	YES	deleterious(0)
10:41877194	T	ENSCAFG00000002223	ENSCAFT00000047996	Transcript	missense_variant	634	634	212	G/R	Gga/Aga	-	-	-1	NPAS2	HGNC	HGNC:7895	protein_coding	YES	deleterious(0.02)
10:42918523	G	ENSCAFG00000023079	ENSCAFT00000003521	Transcript	missense_variant	949	949	317	T/A	Acc/Gcc	-	-	1	AFF3	HGNC	HGNC:6473	protein_coding	YES	deleterious(0)
10:43074182	A	ENSCAFG00000023079	ENSCAFT00000003521	Transcript	missense_variant	1426	1426	476	D/N	Gac/Aac	-	-	1	AFF3	HGNC	HGNC:6473	protein_coding	YES	deleterious(0)
10:43074333	A	ENSCAFG00000023079	ENSCAFT00000003521	Transcript	missense_variant	1577	1577	526	R/Q	cGa/cAa	-	-	1	AFF3	HGNC	HGNC:6473	protein_coding	YES	deleterious(0.02)
10:43108246	A	ENSCAFG00000023079	ENSCAFT00000003521	Transcript	missense_variant	3568	3568	1190	E/K	Gaa/Aaa	-	-	1	AFF3	HGNC	HGNC:6473	protein_coding	YES	deleterious(0)
10:43244124	T	ENSCAFG00000002260	ENSCAFT00000003562	Transcript	missense_variant	3127	2966	989	T/M	aCg/aTg	-	-	1	REV1	HGNC	HGNC:14060	protein_coding	YES	deleterious(0)
10:43253886-43253887	-	ENSCAFG00000002278	ENSCAFT00000003577	Transcript	frameshift_variant,splice_region_variant,feature_truncation	3015	3015	1005	-	-	-	-	-1	EIF5B	HGNC	HGNC:30793	protein_coding	YES	-
10:44102179	T	ENSCAFG00000002344	ENSCAFT00000003678	Transcript	missense_variant	2626	2626	876	A/T	Gct/Act	-	-	-1	INPP4A	HGNC	HGNC:6074	protein_coding	YES	deleterious(0.02)
10:44357938	A	ENSCAFG00000002358	ENSCAFT00000003702	Transcript	missense_variant	2705	2705	902	S/F	tCc/tTc	-	-	-1	VWA3B	HGNC	HGNC:28385	protein_coding	YES	deleterious(0.04)
10:44791678	A	ENSCAFG00000002365	ENSCAFT00000003712	Transcript	missense_variant	3248	3248	1083	R/H	cGt/cAt	-	-	1	TMEM131	HGNC	HGNC:30366	protein_coding	YES	deleterious(0.02)
10:44793261	T	ENSCAFG00000002365	ENSCAFT00000003712	Transcript	stop_gained	3625	3625	1209	R/*	Cga/Tga	-	-	1	TMEM131	HGNC	HGNC:30366	protein_coding	YES	-
10:45012052	T	ENSCAFG00000002390	ENSCAFT00000003744	Transcript	missense_variant	452	452	151	T/I	aCc/aTc	-	-	1	FAM178B	HGNC	HGNC:28036	protein_coding	YES	deleterious(0.04)
10:46063829	T	ENSCAFG00000002463	ENSCAFT00000003884	Transcript	missense_variant	1524	1402	468	D/N	Gat/Aat	-	-	-1	THADA	Uniprot_gn	-	protein_coding	YES	deleterious(0)
10:46198353	T	ENSCAFG00000002489	ENSCAFT00000003931	Transcript	stop_gained	3463	3334	1112	R/*	Cga/Tga	-	-	1	PLEKHH2	HGNC	HGNC:30506	protein_coding	YES	-
10:46307231	A	ENSCAFG00000002518	ENSCAFT00000003971	Transcript	missense_variant	890	284	95	G/E	gGa/gAa	-	-	1	ABCG8	HGNC	HGNC:13887	protein_coding	YES	deleterious(0)
10:47340700	T	ENSCAFG00000002547	ENSCAFT00000004014	Transcript	missense_variant	82	82	28	L/F	Ctt/Ttt	-	-	1	SIX3	HGNC	HGNC:10889	protein_coding	YES	deleterious(0.02)
10:47341342	A	ENSCAFG00000002547	ENSCAFT00000004014	Transcript	missense_variant	724	724	242	E/K	Gaa/Aaa	-	-	1	SIX3	HGNC	HGNC:10889	protein_coding	YES	deleterious(0.01)
10:47877372	A	ENSCAFG00000002554	ENSCAFT00000004029	Transcript	missense_variant	1838	1838	613	P/L	cCa/cTa	-	-	-1	SRBD1	HGNC	HGNC:25521	protein_coding	YES	deleterious(0)
10:48281246	C	ENSCAFG00000002610	ENSCAFT00000004130	Transcript	missense_variant	1046	482	161	R/T	aGg/aCg	-	-	1	PRKCE	HGNC	HGNC:9401	protein_coding	YES	deleterious(0)
10:48313980	A	ENSCAFG00000002610	ENSCAFT00000004130	Transcript	missense_variant	1903	1339	447	D/N	Gat/Aat	-	-	1	PRKCE	HGNC	HGNC:9401	protein_coding	YES	deleterious(0)
10:48612071	A	ENSCAFG00000002627	ENSCAFT00000004132	Transcript	missense_variant	756	756	252	M/I	atG/atA	-	-	1	EPAS1	HGNC	HGNC:3374	protein_coding	YES	deleterious(0)
10:48747047	A	ENSCAFG00000002630	ENSCAFT00000004136	Transcript	stop_gained	148	148	50	R/*	Cga/Tga	-	-	-1	ATP6V1E2	HGNC	HGNC:18125	protein_coding	YES	-
10:487573	A	ENSCAFG00000000109	ENSCAFT00000000173	Transcript	missense_variant	2248	1871	624	T/M	aCg/aTg	-	-	-1	SMARCC2	HGNC	HGNC:11105	protein_coding	YES	deleterious(0)
10:48819881	A	ENSCAFG00000002632	ENSCAFT00000004138	Transcript	missense_variant	542	521	174	P/L	cCa/cTa	-	-	-1	PIGF	HGNC	HGNC:8962	protein_coding	YES	deleterious(0)
10:48974168	A	ENSCAFG00000002634	ENSCAFT00000004140	Transcript	missense_variant	1327	1327	443	D/N	Gac/Aac	-	-	1	SOCS5	HGNC	HGNC:16852	protein_coding	YES	deleterious(0.02)
10:49291475	A	ENSCAFG00000002643	ENSCAFT00000004157	Transcript	missense_variant	172	118	40	N/Y	Aat/Tat	-	-	-1	C2orf61	HGNC	HGNC:26850	protein_coding	YES	deleterious(0)
10:49848801	T	ENSCAFG00000002669	ENSCAFT00000004211	Transcript	missense_variant	1343	1343	448	G/E	gGa/gAa	-	-	-1	FBXO11	HGNC	HGNC:13590	protein_coding	YES	deleterious(0.01)
10:49857825	A	ENSCAFG00000002669	ENSCAFT00000004211	Transcript	missense_variant	995	995	332	S/F	tCt/tTt	-	-	-1	FBXO11	HGNC	HGNC:13590	protein_coding	YES	deleterious(0.01)
10:49860756	C	ENSCAFG00000002669	ENSCAFT00000004211	Transcript	stop_gained	642	642	214	Y/*	taT/taG	-	-	-1	FBXO11	HGNC	HGNC:13590	protein_coding	YES	-
10:50482495	A	ENSCAFG00000002693	ENSCAFT00000004254	Transcript	missense_variant	211	211	71	L/F	Ctc/Ttc	-	-	-1	-	-	-	protein_coding	YES	deleterious(0.03)
10:52130315	A	ENSCAFG00000002712	ENSCAFT00000004299	Transcript	missense_variant	1834	1598	533	T/I	aCa/aTa	-	-	-1	-	-	-	protein_coding	YES	deleterious(0.01)
10:52169617	A	ENSCAFG00000002712	ENSCAFT00000004299	Transcript	stop_gained	1515	1279	427	R/*	Cga/Tga	-	-	-1	-	-	-	protein_coding	YES	-
10:54841864	A	ENSCAFG00000002724	ENSCAFT00000004328	Transcript	missense_variant	1550	1172	391	G/E	gGa/gAa	-	-	1	ERLEC1	HGNC	HGNC:25222	protein_coding	YES	deleterious(0)
10:55271762	T	ENSCAFG00000002740	ENSCAFT00000004347	Transcript	stop_gained	1443	1171	391	R/*	Cga/Tga	-	-	1	C2orf73	HGNC	HGNC:26861	protein_coding	YES	-
10:55524101-55524106	-	ENSCAFG00000002744	ENSCAFT00000004367	Transcript	frameshift_variant,feature_truncation	1425-1429	1425-1429	475-477	-	-	-	-	1	SPTBN1	HGNC	HGNC:11275	protein_coding	YES	-
10:55552635	T	ENSCAFG00000002744	ENSCAFT00000004367	Transcript	missense_variant	5653	5653	1885	R/W	Cgg/Tgg	-	-	1	SPTBN1	HGNC	HGNC:11275	protein_coding	YES	deleterious(0)
10:55777388	A	ENSCAFG00000002762	ENSCAFT00000004419	Transcript	missense_variant	1384	1384	462	D/N	Gat/Aat	-	-	1	EML6	HGNC	HGNC:35412	protein_coding	YES	deleterious(0.05)
10:56113716	T	ENSCAFG00000002819	ENSCAFT00000004510	Transcript	missense_variant	1013	1013	338	G/E	gGa/gAa	-	-	-1	CLHC1	HGNC	HGNC:26453	protein_coding	YES	deleterious(0.02)
10:56133096-56133099	-	ENSCAFG00000023471	ENSCAFT00000036091	Transcript	inframe_deletion	73-75	36-38	12-13	TI/T	acCATc/acc	-	-	1	RPS27A	EntrezGene	-	protein_coding	YES	-
10:56137399	T	ENSCAFG00000002829	ENSCAFT00000004524	Transcript	frameshift_variant,feature_elongation	1974-1975	1974-1975	658-659	-	-	-	-	-1	MTIF2	HGNC	HGNC:7441	protein_coding	YES	-
10:56142679	T	ENSCAFG00000002829	ENSCAFT00000004524	Transcript	missense_variant	1159	1159	387	L/M	Ctg/Atg	-	-	-1	MTIF2	HGNC	HGNC:7441	protein_coding	YES	deleterious(0)
10:56148426	A	ENSCAFG00000002829	ENSCAFT00000004524	Transcript	missense_variant	692	692	231	T/M	aCg/aTg	-	-	-1	MTIF2	HGNC	HGNC:7441	protein_coding	YES	deleterious(0)
10:56176033	C	ENSCAFG00000002796	ENSCAFT00000004477	Transcript	missense_variant	5458	5458	1820	R/G	Cga/Gga	-	-	-1	CCDC88A	HGNC	HGNC:25523	protein_coding	YES	deleterious(0)
10:56195641	A	ENSCAFG00000002796	ENSCAFT00000004477	Transcript	stop_gained	3436	3436	1146	R/*	Cga/Tga	-	-	-1	CCDC88A	HGNC	HGNC:25523	protein_coding	YES	-
10:56197050	T	ENSCAFG00000002796	ENSCAFT00000004477	Transcript	missense_variant	3217	3217	1073	E/K	Gag/Aag	-	-	-1	CCDC88A	HGNC	HGNC:25523	protein_coding	YES	deleterious(0)
10:56300747	G	ENSCAFG00000002796	ENSCAFT00000004477	Transcript	missense_variant,splice_region_variant	65	65	22	V/A	gTt/gCt	-	-	-1	CCDC88A	HGNC	HGNC:25523	protein_coding	YES	deleterious(0)
10:56402405-56402410	-	ENSCAFG00000002838	ENSCAFT00000004544	Transcript	frameshift_variant,feature_truncation	960-964	960-964	320-322	-	-	-	-	1	CCDC104	HGNC	HGNC:30540	protein_coding	YES	-
10:56448053-56448064	-	ENSCAFG00000002860	ENSCAFT00000004589	Transcript	frameshift_variant,feature_truncation	974-984	886-896	296-299	-	-	-	-	-1	SMEK2	HGNC	HGNC:29267	protein_coding	YES	-
10:56513346-56513350	-	ENSCAFG00000002891	ENSCAFT00000004640	Transcript	frameshift_variant,feature_truncation	371-374	371-374	124-125	-	-	-	-	-1	PNPT1	HGNC	HGNC:23166	protein_coding	YES	-
10:56639326	T	ENSCAFG00000002919	ENSCAFT00000004675	Transcript	missense_variant	1705	1319	440	G/E	gGa/gAa	-	-	-1	EFEMP1	HGNC	HGNC:3218	protein_coding	YES	deleterious(0)
10:5762023	C	ENSCAFG00000000333	ENSCAFT00000048388	Transcript	splice_donor_variant	-	-	-	-	-	-	-	1	MON2	HGNC	HGNC:29177	protein_coding	YES	-
10:582570	T	ENSCAFG00000029573	ENSCAFT00000048965	Transcript	missense_variant	682	682	228	P/S	Cca/Tca	-	-	1	COQ10A	HGNC	HGNC:26515	protein_coding	YES	deleterious(0.02)
10:582577	G	ENSCAFG00000029573	ENSCAFT00000048965	Transcript	missense_variant	689	689	230	T/R	aCa/aGa	-	-	1	COQ10A	HGNC	HGNC:26515	protein_coding	YES	deleterious(0.03)
10:60598132	A	ENSCAFG00000002955	ENSCAFT00000004732	Transcript	missense_variant	2092	2092	698	R/C	Cgc/Tgc	-	-	-1	BCL11A	HGNC	HGNC:13221	protein_coding	YES	deleterious(0)
10:60903453	A	ENSCAFG00000002975	ENSCAFT00000004771	Transcript	frameshift_variant,feature_elongation	465-466	465-466	155-156	-	-	-	-	1	PAPOLG	HGNC	HGNC:14982	protein_coding	YES	-
10:60903812	T	ENSCAFG00000002975	ENSCAFT00000004771	Transcript	missense_variant	605	605	202	S/F	tCc/tTc	-	-	1	PAPOLG	HGNC	HGNC:14982	protein_coding	YES	deleterious(0.01)
10:61020506	A	ENSCAFG00000002981	ENSCAFT00000004779	Transcript	missense_variant	967	661	221	V/M	Gtg/Atg	-	-	1	REL	HGNC	HGNC:9954	protein_coding	YES	deleterious(0.03)
10:61230880	A	ENSCAFG00000030289	ENSCAFT00000043216	Transcript	missense_variant	357	334	112	E/K	Gaa/Aaa	-	-	1	C2orf74	HGNC	HGNC:34439	protein_coding	YES	deleterious(0.03)
10:61302738	T	ENSCAFG00000003007	ENSCAFT00000004838	Transcript	missense_variant	7217	7217	2406	R/Q	cGa/cAa	-	-	-1	USP34	HGNC	HGNC:20066	protein_coding	YES	deleterious(0.01)
10:61426598-61426601	-	ENSCAFG00000003007	ENSCAFT00000004838	Transcript	inframe_deletion	879-881	879-881	293-294	TT/T	acAACg/acg	-	-	-1	USP34	HGNC	HGNC:20066	protein_coding	YES	-
10:61576157	T	ENSCAFG00000003050	ENSCAFT00000004940	Transcript	missense_variant	354	236	79	G/E	gGa/gAa	-	-	-1	XPO1	HGNC	HGNC:12825	protein_coding	YES	deleterious(0)
10:63154396	G	ENSCAFG00000003119	ENSCAFT00000005017	Transcript	missense_variant	1163	1139	380	I/T	aTt/aCt	-	-	-1	WDPCP	HGNC	HGNC:28027	protein_coding	YES	deleterious(0)
10:63730167	T	ENSCAFG00000003162	ENSCAFT00000005092	Transcript	missense_variant	921	853	285	G/R	Ggg/Agg	-	-	-1	PELI1	HGNC	HGNC:8827	protein_coding	YES	deleterious(0)
10:6630129	A	ENSCAFG00000000341	ENSCAFT00000000529	Transcript	stop_gained	81	39	13	Y/*	taT/taA	-	-	1	TMEM5	HGNC	HGNC:13530	protein_coding	YES	-
10:66638301	T	ENSCAFG00000003239	ENSCAFT00000005194	Transcript	missense_variant	1916	1916	639	N/I	aAt/aTt	-	-	1	ETAA1	HGNC	HGNC:24648	protein_coding	YES	deleterious(0)
10:67215854	T	ENSCAFG00000003248	ENSCAFT00000005218	Transcript	missense_variant	1633	1633	545	E/K	Gag/Aag	-	-	-1	-	-	-	protein_coding	YES	deleterious(0)
10:67548459	A	ENSCAFG00000029145	ENSCAFT00000043352	Transcript	missense_variant	416	281	94	R/Q	cGg/cAg	-	-	1	PROKR1	HGNC	HGNC:4524	protein_coding	YES	deleterious(0)
10:67788433	G	ENSCAFG00000003275	ENSCAFT00000005245	Transcript	missense_variant	17	17	6	P/R	cCt/cGt	-	-	1	GKN1	HGNC	HGNC:23217	protein_coding	YES	deleterious(0.03)
10:68213826	A	ENSCAFG00000003309	ENSCAFT00000005298	Transcript	missense_variant	1690	1690	564	R/W	Cgg/Tgg	-	-	-1	AAK1	HGNC	HGNC:19679	protein_coding	YES	deleterious(0)
10:68232173	T	ENSCAFG00000003309	ENSCAFT00000005298	Transcript	missense_variant	637	637	213	V/M	Gtg/Atg	-	-	-1	AAK1	HGNC	HGNC:19679	protein_coding	YES	deleterious(0)
10:68260649	T	ENSCAFG00000003309	ENSCAFT00000005298	Transcript	missense_variant	106	106	36	E/K	Gaa/Aaa	-	-	-1	AAK1	HGNC	HGNC:19679	protein_coding	YES	deleterious(0)
10:68449394-68449395	-	ENSCAFG00000031199	ENSCAFT00000042736	Transcript	frameshift_variant,feature_truncation	17	17	6	-	-	-	-	-1	-	-	-	protein_coding	YES	-
10:685327	T	ENSCAFG00000000124	ENSCAFT00000000206	Transcript	missense_variant	538	538	180	D/N	Gac/Aac	-	-	-1	TIMELESS	HGNC	HGNC:11813	protein_coding	YES	deleterious(0)
10:68821496	T	ENSCAFG00000003349	ENSCAFT00000005374	Transcript	missense_variant	698	593	198	T/M	aCg/aTg	-	-	1	PCYOX1	HGNC	HGNC:20588	protein_coding	YES	deleterious(0.05)
10:68823015	T	ENSCAFG00000003349	ENSCAFT00000005374	Transcript	missense_variant	1376	1271	424	S/F	tCc/tTc	-	-	1	PCYOX1	HGNC	HGNC:20588	protein_coding	YES	deleterious(0)
10:68965933	A	ENSCAFG00000003366	ENSCAFT00000005398	Transcript	missense_variant	527	317	106	S/F	tCc/tTc	-	-	-1	TGFA	HGNC	HGNC:11765	protein_coding	YES	deleterious(0.02)
10:7138443	T	ENSCAFG00000000352	ENSCAFT00000000554	Transcript	missense_variant	1031	1031	344	S/F	tCt/tTt	-	-	1	XPOT	HGNC	HGNC:12826	protein_coding	YES	deleterious(0.01)
10:7157977	G	ENSCAFG00000000352	ENSCAFT00000000554	Transcript	missense_variant	2756	2756	919	Y/C	tAt/tGt	-	-	1	XPOT	HGNC	HGNC:12826	protein_coding	YES	deleterious(0)
10:7182683	A	ENSCAFG00000000356	ENSCAFT00000000555	Transcript	missense_variant	400	400	134	R/S	Cgt/Agt	-	-	1	TBK1	HGNC	HGNC:11584	protein_coding	YES	deleterious(0)
10:8037565	A	ENSCAFG00000029740	ENSCAFT00000044828	Transcript	missense_variant	458	407	136	G/E	gGg/gAg	-	-	1	MSRB3	HGNC	HGNC:27375	protein_coding	YES	deleterious(0)
10:838830	C	ENSCAFG00000000135	ENSCAFT00000000220	Transcript	missense_variant	4571	4571	1524	V/G	gTg/gGg	-	-	-1	BAZ2A	HGNC	HGNC:962	protein_coding	YES	deleterious(0)
10:8787236	T	ENSCAFG00000000378	ENSCAFT00000000592	Transcript	missense_variant	2474	2474	825	T/I	aCc/aTc	-	-	1	HELB	HGNC	HGNC:17196	protein_coding	YES	deleterious(0)
10:8804661	T	ENSCAFG00000000384	ENSCAFT00000000607	Transcript	missense_variant	2986	2986	996	D/N	Gat/Aat	-	-	-1	GRIP1	HGNC	HGNC:18708	protein_coding	YES	deleterious(0)
10:8852587	T	ENSCAFG00000000384	ENSCAFT00000000607	Transcript	missense_variant	1805	1805	602	R/H	cGc/cAc	-	-	-1	GRIP1	HGNC	HGNC:18708	protein_coding	YES	deleterious(0.03)
10:9652190	C	ENSCAFG00000000397	ENSCAFT00000000639	Transcript	missense_variant	17	17	6	N/T	aAt/aCt	-	-	1	CAND1	HGNC	HGNC:30688	protein_coding	YES	deleterious(0.01)
11:1027837-1027838	-	ENSCAFG00000000491	ENSCAFT00000000777	Transcript	frameshift_variant,feature_truncation	399	399	133	-	-	-	-	1	-	-	-	protein_coding	YES	-
11:115842	T	ENSCAFG00000012938	ENSCAFT00000020534	Transcript	missense_variant	1219	1219	407	D/N	Gac/Aac	-	-	-1	MGAT1	HGNC	HGNC:7044	protein_coding	YES	deleterious(0.01)
11:1175436	A	ENSCAFG00000000482	ENSCAFT00000000771	Transcript	missense_variant	3394	3394	1132	E/K	Gag/Aag	-	-	1	FLT4	HGNC	HGNC:3767	protein_coding	YES	deleterious(0.01)
11:1213692	T	ENSCAFG00000000464	ENSCAFT00000000745	Transcript	missense_variant	1530	1528	510	D/N	Gac/Aac	-	-	-1	CNOT6	HGNC	HGNC:14099	protein_coding	YES	deleterious(0.04)
11:12883357	T	ENSCAFG00000031961	ENSCAFT00000046555	Transcript	missense_variant	1312	475	159	V/M	Gtg/Atg	-	-	-1	PPIC	HGNC	HGNC:9256	protein_coding	YES	deleterious(0)
11:1407431	T	ENSCAFG00000000433	ENSCAFT00000000718	Transcript	missense_variant	1252	1046	349	T/I	aCc/aTc	-	-	1	GFPT2	HGNC	HGNC:4242	protein_coding	YES	deleterious(0.05)
11:1410523	A	ENSCAFG00000000433	ENSCAFT00000000718	Transcript	missense_variant	1722	1516	506	E/K	Gag/Aag	-	-	1	GFPT2	HGNC	HGNC:4242	protein_coding	YES	deleterious(0.03)
11:14405748	T	ENSCAFG00000000569	ENSCAFT00000000881	Transcript	missense_variant	240	50	17	V/D	gTt/gAt	-	-	-1	ZNF608	HGNC	HGNC:29238	protein_coding	YES	deleterious(0)
11:15756540-15756543	-	ENSCAFG00000000582	ENSCAFT00000000901	Transcript	inframe_deletion	160-162	160-162	54	K/-	AAG/-	-	-	1	GRAMD3	HGNC	HGNC:24911	protein_coding	YES	-
11:15756540-15756543	-	ENSCAFG00000000582	ENSCAFT00000049541	Transcript	inframe_deletion	115-117	115-117	39	K/-	AAG/-	-	-	1	GRAMD3	HGNC	HGNC:24911	protein_coding	-	-
11:15776088	G	ENSCAFG00000000582	ENSCAFT00000000901	Transcript	missense_variant	1187	1187	396	I/S	aTt/aGt	-	-	1	GRAMD3	HGNC	HGNC:24911	protein_coding	YES	deleterious(0.04)
11:16038991	A	ENSCAFG00000000593	ENSCAFT00000049391	Transcript	missense_variant	1031	1031	344	R/H	cGc/cAc	-	-	1	LMNB1	HGNC	HGNC:6637	protein_coding	YES	deleterious(0.03)
11:16634208	A	ENSCAFG00000000622	ENSCAFT00000000959	Transcript	missense_variant	1084	871	291	L/M	Ttg/Atg	-	-	1	PRRC1	HGNC	HGNC:28164	protein_coding	YES	deleterious(0.01)
11:1706654	A	ENSCAFG00000024952	ENSCAFT00000038586	Transcript	missense_variant	542	467	156	R/H	cGc/cAc	-	-	1	RNF130	HGNC	HGNC:18280	protein_coding	YES	deleterious(0.01)
11:17209889	T	ENSCAFG00000000637	ENSCAFT00000000989	Transcript	missense_variant	1718	1306	436	R/C	Cgt/Tgt	-	-	1	SLC12A2	HGNC	HGNC:10911	protein_coding	YES	deleterious(0)
11:17323947	T	ENSCAFG00000000681	ENSCAFT00000001089	Transcript	missense_variant	8298	7805	2602	G/E	gGa/gAa	-	-	-1	FBN2	HGNC	HGNC:3604	protein_coding	YES	deleterious(0)
11:17365900	T	ENSCAFG00000000681	ENSCAFT00000001089	Transcript	missense_variant	4955	4462	1488	G/S	Ggc/Agc	-	-	-1	FBN2	HGNC	HGNC:3604	protein_coding	YES	deleterious(0)
11:17408886	T	ENSCAFG00000000681	ENSCAFT00000001089	Transcript	missense_variant	2545	2052	684	N/K	aaC/aaA	-	-	-1	FBN2	HGNC	HGNC:3604	protein_coding	YES	deleterious(0)
11:17411810	T	ENSCAFG00000000681	ENSCAFT00000001089	Transcript	missense_variant	2355	1862	621	G/E	gGa/gAa	-	-	-1	FBN2	HGNC	HGNC:3604	protein_coding	YES	deleterious(0)
11:17417936	A	ENSCAFG00000000681	ENSCAFT00000001089	Transcript	missense_variant	2045	1552	518	R/C	Cgt/Tgt	-	-	-1	FBN2	HGNC	HGNC:3604	protein_coding	YES	deleterious(0)
11:17535882	T	ENSCAFG00000000681	ENSCAFT00000001089	Transcript	missense_variant	1089	596	199	G/E	gGa/gAa	-	-	-1	FBN2	HGNC	HGNC:3604	protein_coding	YES	deleterious(0)
11:178688	G	ENSCAFG00000030899	ENSCAFT00000048665	Transcript	missense_variant	823	616	206	S/P	Tca/Cca	-	-	-1	ZFP62	HGNC	HGNC:23241	protein_coding	YES	deleterious(0.03)
11:17899877	A	ENSCAFG00000000710	ENSCAFT00000001116	Transcript	missense_variant	1114	322	108	V/M	Gtg/Atg	-	-	1	SLC27A6	HGNC	HGNC:11000	protein_coding	YES	deleterious(0.01)
11:18470582	T	ENSCAFG00000000722	ENSCAFT00000001124	Transcript	missense_variant	2781	2781	927	K/N	aaG/aaT	-	-	1	ADAMTS19	HGNC	HGNC:17111	protein_coding	YES	deleterious(0)
11:18499322	T	ENSCAFG00000000722	ENSCAFT00000001124	Transcript	stop_gained	3499	3499	1167	R/*	Cga/Tga	-	-	1	ADAMTS19	HGNC	HGNC:17111	protein_coding	YES	-
11:2016304	T	ENSCAFG00000000347	ENSCAFT00000044838	Transcript	missense_variant	349	349	117	T/S	Acc/Tcc	-	-	1	CBY3	HGNC	HGNC:33278	protein_coding	YES	deleterious(0.05)
11:21040308	A	ENSCAFG00000000898	ENSCAFT00000001398	Transcript	missense_variant	259	259	87	L/F	Ctt/Ttt	-	-	-1	KIF3A	HGNC	HGNC:6319	protein_coding	YES	deleterious(0.03)
11:21116581	A	ENSCAFG00000000914	ENSCAFT00000001419	Transcript	missense_variant	2404	2366	789	P/L	cCc/cTc	-	-	-1	SHROOM1	HGNC	HGNC:24084	protein_coding	YES	deleterious(0.03)
11:21119725	A	ENSCAFG00000000914	ENSCAFT00000001419	Transcript	missense_variant	82	44	15	S/L	tCg/tTg	-	-	-1	SHROOM1	HGNC	HGNC:24084	protein_coding	YES	deleterious(0)
11:21460095	GCACT	ENSCAFG00000000968	ENSCAFT00000001498	Transcript	frameshift_variant,feature_elongation	2111-2112	2111-2112	704	-	-	-	-	-1	FSTL4	HGNC	HGNC:21389	protein_coding	YES	-
11:22681030	A	ENSCAFG00000001021	ENSCAFT00000001570	Transcript	missense_variant	1432	1432	478	L/M	Ctg/Atg	-	-	1	JADE2	HGNC	HGNC:22984	protein_coding	YES	deleterious(0.04)
11:22949292	A	ENSCAFG00000001058	ENSCAFT00000001623	Transcript	missense_variant	488	335	112	C/Y	tGc/tAc	-	-	1	TXNDC15	HGNC	HGNC:20652	protein_coding	YES	deleterious(0.03)
11:23044093	A	ENSCAFG00000001062	ENSCAFT00000001629	Transcript	missense_variant	488	488	163	R/H	cGt/cAt	-	-	1	CATSPER3	HGNC	HGNC:20819	protein_coding	YES	deleterious(0)
11:23070336	A	ENSCAFG00000001065	ENSCAFT00000001631	Transcript	missense_variant	571	415	139	R/W	Cgg/Tgg	-	-	-1	PITX1	HGNC	HGNC:9004	protein_coding	YES	deleterious(0)
11:23072527	A	ENSCAFG00000001065	ENSCAFT00000001631	Transcript	missense_variant	424	268	90	R/W	Cgg/Tgg	-	-	-1	PITX1	HGNC	HGNC:9004	protein_coding	YES	deleterious(0)
11:23857995	C	ENSCAFG00000030898	ENSCAFT00000047009	Transcript	missense_variant	1234	743	248	L/P	cTt/cCt	-	-	1	FBXL21	HGNC	HGNC:13600	protein_coding	YES	deleterious(0)
11:23956722-23956724	-	ENSCAFG00000001091	ENSCAFT00000001665	Transcript	frameshift_variant,feature_truncation	649-650	649-650	217	-	-	-	-	1	TGFBI	HGNC	HGNC:11771	protein_coding	YES	-
11:2408979	A	ENSCAFG00000000334	ENSCAFT00000000511	Transcript	missense_variant	943	770	257	R/Q	cGa/cAa	-	-	1	ADAMTS2	HGNC	HGNC:218	protein_coding	YES	deleterious(0)
11:24244445	T	ENSCAFG00000001103	ENSCAFT00000001686	Transcript	missense_variant	577	577	193	P/T	Ccg/Acg	-	-	-1	TRPC7	HGNC	HGNC:20754	protein_coding	YES	deleterious(0)
11:2448958	T	ENSCAFG00000000334	ENSCAFT00000000511	Transcript	missense_variant	1200	1027	343	R/C	Cgc/Tgc	-	-	1	ADAMTS2	HGNC	HGNC:218	protein_coding	YES	deleterious(0)
11:2457173	A	ENSCAFG00000000334	ENSCAFT00000000511	Transcript	missense_variant	1543	1370	457	R/H	cGc/cAc	-	-	1	ADAMTS2	HGNC	HGNC:218	protein_coding	YES	deleterious(0.03)
11:2478547	G	ENSCAFG00000000334	ENSCAFT00000000511	Transcript	frameshift_variant,feature_elongation	2243-2244	2070-2071	690-691	-	-	-	-	1	ADAMTS2	HGNC	HGNC:218	protein_coding	YES	-
11:25348290	T	ENSCAFG00000001126	ENSCAFT00000001724	Transcript	missense_variant	1315	1315	439	V/I	Gtt/Att	-	-	-1	KLHL3	HGNC	HGNC:6354	protein_coding	YES	deleterious(0.01)
11:25369895	T	ENSCAFG00000001126	ENSCAFT00000001724	Transcript	missense_variant	722	722	241	R/H	cGt/cAt	-	-	-1	KLHL3	HGNC	HGNC:6354	protein_coding	YES	deleterious(0.01)
11:25607716	C	ENSCAFG00000001146	ENSCAFT00000001760	Transcript	missense_variant	1274	1150	384	F/L	Ttc/Ctc	-	-	1	PKD2L2	HGNC	HGNC:9012	protein_coding	YES	deleterious(0.03)
11:25807183	T	ENSCAFG00000001186	ENSCAFT00000001856	Transcript	missense_variant	2656	2656	886	S/T	Tct/Act	-	-	-1	BRD8	HGNC	HGNC:19874	protein_coding	YES	deleterious(0)
11:2582660	T	ENSCAFG00000000332	ENSCAFT00000000509	Transcript	missense_variant	935	935	312	A/V	gCc/gTc	-	-	1	GRM6	HGNC	HGNC:4598	protein_coding	YES	deleterious(0.05)
11:25948421	T	ENSCAFG00000001225	ENSCAFT00000001903	Transcript	missense_variant	1245	1093	365	R/W	Cgg/Tgg	-	-	1	FAM53C	HGNC	HGNC:1336	protein_coding	YES	deleterious(0.01)
11:25996072	T	ENSCAFG00000001233	ENSCAFT00000001923	Transcript	missense_variant	3309	3181	1061	R/C	Cgt/Tgt	-	-	1	KDM3B	HGNC	HGNC:1337	protein_coding	YES	deleterious(0)
11:26772306	A	ENSCAFG00000001345	ENSCAFT00000002097	Transcript	missense_variant	649	388	130	E/K	Gag/Aag	-	-	1	MATR3	HGNC	HGNC:6912	protein_coding	YES	deleterious(0.01)
11:269885	A	ENSCAFG00000012915	ENSCAFT00000020497	Transcript	missense_variant	1390	1390	464	G/R	Gga/Aga	-	-	1	BTNL9	HGNC	HGNC:24176	protein_coding	YES	deleterious(0)
11:27354041	C	ENSCAFG00000001365	ENSCAFT00000002107	Transcript	missense_variant	313	313	105	C/R	Tgc/Cgc	-	-	1	TPD52L3	HGNC	HGNC:23382	protein_coding	YES	deleterious(0.01)
11:27492218	A	ENSCAFG00000001416	ENSCAFT00000002193	Transcript	missense_variant	3379	3038	1013	S/F	tCc/tTc	-	-	-1	GLDC	HGNC	HGNC:4313	protein_coding	YES	deleterious(0)
11:27499921	T	ENSCAFG00000001416	ENSCAFT00000002193	Transcript	missense_variant	3009	2668	890	D/N	Gat/Aat	-	-	-1	GLDC	HGNC	HGNC:4313	protein_coding	YES	deleterious(0)
11:27513021	T	ENSCAFG00000001416	ENSCAFT00000002193	Transcript	frameshift_variant,feature_elongation	2416-2417	2075-2076	692	-	-	-	-	-1	GLDC	HGNC	HGNC:4313	protein_coding	YES	-
11:29106533	A	ENSCAFG00000001460	ENSCAFT00000002280	Transcript	missense_variant,splice_region_variant	5574	5471	1824	A/V	gCg/gTg	-	-	-1	PTPRD	Uniprot_gn	-	protein_coding	YES	deleterious(0)
11:29115273	T	ENSCAFG00000001460	ENSCAFT00000002280	Transcript	missense_variant	5057	4954	1652	R/S	Cgc/Agc	-	-	-1	PTPRD	Uniprot_gn	-	protein_coding	YES	deleterious(0)
11:29259345	G	ENSCAFG00000001460	ENSCAFT00000002280	Transcript	missense_variant	2999	2896	966	T/P	Acc/Ccc	-	-	-1	PTPRD	Uniprot_gn	-	protein_coding	YES	deleterious(0)
11:29259789	A	ENSCAFG00000001460	ENSCAFT00000002280	Transcript	missense_variant	2555	2452	818	L/F	Ctc/Ttc	-	-	-1	PTPRD	Uniprot_gn	-	protein_coding	YES	deleterious(0.01)
11:29412165	T	ENSCAFG00000001460	ENSCAFT00000002280	Transcript	missense_variant	218	115	39	G/R	Gga/Aga	-	-	-1	PTPRD	Uniprot_gn	-	protein_coding	YES	deleterious(0.04)
11:307059	T	ENSCAFG00000028826	ENSCAFT00000047814	Transcript	missense_variant	50	50	17	G/D	gGc/gAc	-	-	-1	-	-	-	protein_coding	YES	deleterious(0)
11:33034225	A	ENSCAFG00000013626	ENSCAFT00000021606	Transcript	missense_variant	512	512	171	I/N	aTc/aAc	-	-	1	-	-	-	protein_coding	YES	deleterious(0.01)
11:33436109	A	ENSCAFG00000032608	ENSCAFT00000045872	Transcript	missense_variant	562	562	188	D/N	Gac/Aac	-	-	1	LURAP1L	HGNC	HGNC:31452	protein_coding	YES	deleterious(0)
11:3417273	A	ENSCAFG00000000235	ENSCAFT00000000370	Transcript	missense_variant	1205	1175	392	A/V	gCg/gTg	-	-	-1	N4BP3	HGNC	HGNC:29852	protein_coding	YES	deleterious(0.04)
11:3523335	C	ENSCAFG00000029490	ENSCAFT00000044478	Transcript	stop_lost	652	652	218	*/Q	Tag/Cag	-	-	1	-	-	-	protein_coding	YES	-
11:35302765	A	ENSCAFG00000001537	ENSCAFT00000002397	Transcript	missense_variant	855	589	197	R/W	Cgg/Tgg	-	-	-1	FREM1	HGNC	HGNC:23399	protein_coding	YES	deleterious(0.05)
11:35487745	A	ENSCAFG00000001545	ENSCAFT00000002411	Transcript	missense_variant	1393	1393	465	I/F	Atc/Ttc	-	-	-1	TTC39B	HGNC	HGNC:23704	protein_coding	YES	deleterious(0.05)
11:35492604	A	ENSCAFG00000001545	ENSCAFT00000002411	Transcript	missense_variant	1154	1154	385	S/F	tCc/tTc	-	-	-1	TTC39B	HGNC	HGNC:23704	protein_coding	YES	deleterious(0)
11:35965010	A	ENSCAFG00000001557	ENSCAFT00000002436	Transcript	stop_gained	1911	1911	637	Y/*	taT/taA	-	-	1	CCDC171	HGNC	HGNC:29828	protein_coding	YES	-
11:38543515	A	ENSCAFG00000001581	ENSCAFT00000002481	Transcript	missense_variant	1337	1183	395	G/S	Ggc/Agc	-	-	1	ADAMTSL1	HGNC	HGNC:14632	protein_coding	YES	deleterious(0)
11:38570824	A	ENSCAFG00000001581	ENSCAFT00000002481	Transcript	missense_variant	2156	2002	668	A/T	Gcc/Acc	-	-	1	ADAMTSL1	HGNC	HGNC:14632	protein_coding	YES	deleterious(0.01)
11:38625620	C	ENSCAFG00000001581	ENSCAFT00000002481	Transcript	missense_variant	2823	2669	890	L/P	cTc/cCc	-	-	1	ADAMTSL1	HGNC	HGNC:14632	protein_coding	YES	deleterious(0)
11:38625673	T	ENSCAFG00000001581	ENSCAFT00000002481	Transcript	missense_variant	2876	2722	908	L/F	Ctc/Ttc	-	-	1	ADAMTSL1	HGNC	HGNC:14632	protein_coding	YES	deleterious(0.04)
11:38626154	T	ENSCAFG00000001581	ENSCAFT00000002481	Transcript	missense_variant	3357	3203	1068	P/L	cCc/cTc	-	-	1	ADAMTSL1	HGNC	HGNC:14632	protein_coding	YES	deleterious(0.04)
11:38649122	A	ENSCAFG00000001581	ENSCAFT00000002481	Transcript	missense_variant	3893	3739	1247	G/S	Ggt/Agt	-	-	1	ADAMTSL1	HGNC	HGNC:14632	protein_coding	YES	deleterious(0)
11:38772042-38772043	-	ENSCAFG00000001590	ENSCAFT00000002492	Transcript	frameshift_variant,feature_truncation	717	717	239	-	-	-	-	-1	FAM154A	HGNC	HGNC:28566	protein_coding	YES	-
11:39114309-39114313	-	ENSCAFG00000001612	ENSCAFT00000039360	Transcript	frameshift_variant,splice_region_variant,feature_truncation	2005-2008	1988-1991	663-664	-	-	-	-	1	DENND4C	HGNC	HGNC:26079	protein_coding	YES	-
11:39200976	T	ENSCAFG00000029621	ENSCAFT00000042911	Transcript	stop_gained	611	268	90	Q/*	Cag/Tag	-	-	1	ACER2	HGNC	HGNC:23675	protein_coding	YES	-
11:40465254	C	ENSCAFG00000025256	ENSCAFT00000039148	Transcript	missense_variant	2512	2354	785	L/P	cTc/cCc	-	-	1	FOCAD	HGNC	HGNC:23377	protein_coding	YES	deleterious(0)
11:42518916	T	ENSCAFG00000001688	ENSCAFT00000002645	Transcript	missense_variant	1049	479	160	G/E	gGa/gAa	-	-	-1	ELAVL2	HGNC	HGNC:3313	protein_coding	YES	deleterious(0)
11:4280114	A	ENSCAFG00000000220	ENSCAFT00000000351	Transcript	missense_variant	715	707	236	G/E	gGg/gAg	-	-	1	KCNN2	HGNC	HGNC:6291	protein_coding	YES	deleterious(0)
11:43784992	A	ENSCAFG00000007543	ENSCAFT00000012068	Transcript	missense_variant	319	319	107	E/K	Gaa/Aaa	-	-	1	-	-	-	protein_coding	YES	deleterious(0.03)
11:45329453	C	ENSCAFG00000001713	ENSCAFT00000002677	Transcript	missense_variant	1022	394	132	T/P	Act/Cct	-	-	1	TEK	HGNC	HGNC:11724	protein_coding	YES	deleterious(0.02)
11:45417867	T	ENSCAFG00000024872	ENSCAFT00000038451	Transcript	stop_gained	606	606	202	W/*	tgG/tgA	-	-	-1	EQTN	HGNC	HGNC:1359	protein_coding	YES	-
11:45489231	T	ENSCAFG00000001715	ENSCAFT00000002680	Transcript	missense_variant	790	538	180	A/T	Gcc/Acc	-	-	-1	MOB3B	HGNC	HGNC:23825	protein_coding	YES	deleterious(0.03)
11:45642002	A	ENSCAFG00000001716	ENSCAFT00000002681	Transcript	missense_variant	376	376	126	A/T	Gcg/Acg	-	-	1	IFNK	HGNC	HGNC:21714	protein_coding	YES	deleterious(0.02)
11:45999099	T	ENSCAFG00000001727	ENSCAFT00000002705	Transcript	missense_variant	971	971	324	R/H	cGt/cAt	-	-	-1	LINGO2	HGNC	HGNC:21207	protein_coding	YES	deleterious(0.03)
11:45999219	A	ENSCAFG00000001727	ENSCAFT00000002705	Transcript	missense_variant	851	851	284	P/L	cCc/cTc	-	-	-1	LINGO2	HGNC	HGNC:21207	protein_coding	YES	deleterious(0.01)
11:49787421	A	ENSCAFG00000001807	ENSCAFT00000002841	Transcript	missense_variant	1127	1127	376	T/I	aCc/aTc	-	-	-1	DDX58	HGNC	HGNC:19102	protein_coding	YES	deleterious(0)
11:49811956	A	ENSCAFG00000001809	ENSCAFT00000002842	Transcript	missense_variant	950	950	317	N/I	aAt/aTt	-	-	-1	TOPORS	HGNC	HGNC:21653	protein_coding	YES	deleterious(0.01)
11:50181988	A	ENSCAFG00000001836	ENSCAFT00000002895	Transcript	missense_variant	827	827	276	T/I	aCa/aTa	-	-	-1	SMU1	HGNC	HGNC:18247	protein_coding	YES	deleterious(0.03)
11:50340195-50340209	-	ENSCAFG00000001843	ENSCAFT00000002905	Transcript	splice_donor_variant,coding_sequence_variant,intron_variant,feature_truncation	52-?	52-?	18-?	-	-	-	-	1	SPINK4	HGNC	HGNC:16646	protein_coding	YES	-
11:5036149-5036152	-	ENSCAFG00000000214	ENSCAFT00000000337	Transcript	inframe_deletion	326-328	105-107	35-36	QH/H	caGCAc/cac	-	-	-1	CCDC112	HGNC	HGNC:28599	protein_coding	YES	-
11:50387904	C	ENSCAFG00000001848	ENSCAFT00000002914	Transcript	missense_variant	22	22	8	S/P	Tca/Cca	-	-	1	NFX1	HGNC	HGNC:7803	protein_coding	YES	deleterious(0.03)
11:50474355	A	ENSCAFG00000001854	ENSCAFT00000002920	Transcript	missense_variant	1084	748	250	R/W	Cgg/Tgg	-	-	-1	-	-	-	protein_coding	YES	deleterious(0.02)
11:50475500	A	ENSCAFG00000001854	ENSCAFT00000002920	Transcript	missense_variant	704	368	123	S/F	tCc/tTc	-	-	-1	-	-	-	protein_coding	YES	deleterious(0)
11:51169650	A	ENSCAFG00000001923	ENSCAFT00000047279	Transcript	missense_variant	113	113	38	S/Y	tCc/tAc	-	-	1	DNAI1	HGNC	HGNC:2954	protein_coding	YES	deleterious(0.03)
11:51297408	T	ENSCAFG00000024873	ENSCAFT00000028460	Transcript	missense_variant	478	478	160	V/M	Gtg/Atg	-	-	-1	ARID3C	HGNC	HGNC:21209	protein_coding	YES	deleterious(0)
11:5137956	T	ENSCAFG00000000211	ENSCAFT00000000334	Transcript	missense_variant	61	61	21	R/C	Cgc/Tgc	-	-	1	AK3	HGNC	HGNC:17376	protein_coding	YES	deleterious(0)
11:51570930	A	ENSCAFG00000001962	ENSCAFT00000003104	Transcript	missense_variant	755	590	197	G/D	gGc/gAc	-	-	1	KIAA1045	HGNC	HGNC:29180	protein_coding	YES	deleterious(0.01)
11:51574604	A	ENSCAFG00000001962	ENSCAFT00000003104	Transcript	missense_variant	856	691	231	E/K	Gag/Aag	-	-	1	KIAA1045	HGNC	HGNC:29180	protein_coding	YES	deleterious(0.05)
11:51838262	A	ENSCAFG00000002030	ENSCAFT00000003214	Transcript	missense_variant	1141	730	244	D/N	Gat/Aat	-	-	1	UNC13B	HGNC	HGNC:12566	protein_coding	YES	deleterious(0)
11:51939096	T	ENSCAFG00000002030	ENSCAFT00000003214	Transcript	missense_variant	4816	4405	1469	P/S	Cca/Tca	-	-	1	UNC13B	HGNC	HGNC:12566	protein_coding	YES	deleterious(0)
11:52131703	T	ENSCAFG00000002049	ENSCAFT00000003251	Transcript	missense_variant	1925	1501	501	R/C	Cgc/Tgc	-	-	1	RUSC2	HGNC	HGNC:23625	protein_coding	YES	deleterious(0)
11:52140382	A	ENSCAFG00000002049	ENSCAFT00000003251	Transcript	missense_variant	3554	3130	1044	A/T	Gca/Aca	-	-	1	RUSC2	HGNC	HGNC:23625	protein_coding	YES	deleterious(0.01)
11:52143674	T	ENSCAFG00000002049	ENSCAFT00000003251	Transcript	missense_variant	4454	4030	1344	P/S	Ccc/Tcc	-	-	1	RUSC2	HGNC	HGNC:23625	protein_coding	YES	deleterious(0.03)
11:52247590	T	ENSCAFG00000002154	ENSCAFT00000003418	Transcript	missense_variant	1471	1471	491	A/T	Gcc/Acc	-	-	-1	TLN1	HGNC	HGNC:11845	protein_coding	YES	deleterious(0.05)
11:52332563	T	ENSCAFG00000002233	ENSCAFT00000003506	Transcript	missense_variant	1618	1618	540	R/C	Cgt/Tgt	-	-	1	NPR2	HGNC	HGNC:7944	protein_coding	YES	deleterious(0)
11:52340487	A	ENSCAFG00000029463	ENSCAFT00000044181	Transcript	missense_variant	809	809	270	G/V	gGa/gTa	-	-	-1	SPAG8	HGNC	HGNC:14105	protein_coding	YES	deleterious(0)
11:52399528	A	ENSCAFG00000023939	ENSCAFT00000003561	Transcript	missense_variant	540	540	180	E/D	gaG/gaT	-	-	-1	OR13J1	HGNC	HGNC:15108	protein_coding	YES	deleterious(0.03)
11:52399619	T	ENSCAFG00000023939	ENSCAFT00000003561	Transcript	missense_variant	449	449	150	G/E	gGa/gAa	-	-	-1	OR13J1	HGNC	HGNC:15108	protein_coding	YES	deleterious(0.01)
11:52400006	A	ENSCAFG00000023939	ENSCAFT00000003561	Transcript	missense_variant	62	62	21	P/L	cCa/cTa	-	-	-1	OR13J1	HGNC	HGNC:15108	protein_coding	YES	deleterious(0.01)
11:52485935	A	ENSCAFG00000031867	ENSCAFT00000047904	Transcript	stop_gained	58	58	20	Q/*	Caa/Taa	-	-	-1	-	-	-	protein_coding	YES	-
11:5251621	C	ENSCAFG00000000210	ENSCAFT00000000333	Transcript	missense_variant,splice_region_variant	1447	547	183	N/D	Aat/Gat	-	-	-1	FEM1C	HGNC	HGNC:16933	protein_coding	YES	deleterious(0.03)
11:52570016	G	ENSCAFG00000002281	ENSCAFT00000003581	Transcript	stop_gained	1635	1563	521	Y/*	taC/taG	-	-	1	RECK	HGNC	HGNC:11345	protein_coding	YES	-
11:52639595	T	ENSCAFG00000002286	ENSCAFT00000003587	Transcript	missense_variant	1292	1292	431	G/V	gGc/gTc	-	-	1	CCIN	HGNC	HGNC:1568	protein_coding	YES	deleterious(0.01)
11:53376540	C	ENSCAFG00000002357	ENSCAFT00000048498	Transcript	frameshift_variant,feature_elongation	76-77	76-77	26	-	-	-	-	-1	PAX5	HGNC	HGNC:8619	protein_coding	YES	-
11:53636334	A	ENSCAFG00000024624	ENSCAFT00000003709	Transcript	stop_gained	1065	906	302	W/*	tgG/tgA	-	-	1	ZCCHC7	HGNC	HGNC:26209	protein_coding	YES	-
11:53763874	A	ENSCAFG00000029817	ENSCAFT00000050054	Transcript	missense_variant	1129	1129	377	R/W	Cgg/Tgg	-	-	-1	ZBTB5	HGNC	HGNC:23836	protein_coding	YES	deleterious(0)
11:54046271	T	ENSCAFG00000002386	ENSCAFT00000003740	Transcript	missense_variant	2129	2129	710	C/F	tGc/tTc	-	-	1	FRMPD1	HGNC	HGNC:29159	protein_coding	YES	deleterious(0)
11:54046272	G	ENSCAFG00000002386	ENSCAFT00000003740	Transcript	missense_variant	2130	2130	710	C/W	tgC/tgG	-	-	1	FRMPD1	HGNC	HGNC:29159	protein_coding	YES	deleterious(0)
11:54049751	T	ENSCAFG00000002386	ENSCAFT00000003740	Transcript	missense_variant	2732	2732	911	P/L	cCc/cTc	-	-	1	FRMPD1	HGNC	HGNC:29159	protein_coding	YES	deleterious(0.01)
11:54077233-54077255	-	ENSCAFG00000002391	ENSCAFT00000003746	Transcript	frameshift_variant,splice_region_variant,feature_truncation	1181-1202	452-473	151-158	-	-	-	-	-1	EXOSC3	HGNC	HGNC:17944	protein_coding	YES	-
11:54577393	T	ENSCAFG00000002400	ENSCAFT00000003767	Transcript	missense_variant	824	271	91	R/C	Cgc/Tgc	-	-	1	ALDH1B1	HGNC	HGNC:407	protein_coding	YES	deleterious(0.03)
11:54678678	C	ENSCAFG00000002403	ENSCAFT00000003771	Transcript	missense_variant	750	750	250	L/F	ttG/ttC	-	-	1	CCDC180	HGNC	HGNC:29303	protein_coding	YES	deleterious(0.01)
11:54952277	G	ENSCAFG00000002445	ENSCAFT00000003862	Transcript	missense_variant	671	671	224	P/R	cCg/cGg	-	-	1	NCBP1	HGNC	HGNC:7658	protein_coding	YES	deleterious(0.01)
11:55186106	A	ENSCAFG00000002460	ENSCAFT00000003876	Transcript	missense_variant	1168	1168	390	L/F	Ctc/Ttc	-	-	-1	C9orf156	HGNC	HGNC:30967	protein_coding	YES	deleterious(0.04)
11:55197885	T	ENSCAFG00000002460	ENSCAFT00000003876	Transcript	missense_variant	158	158	53	C/Y	tGt/tAt	-	-	-1	C9orf156	HGNC	HGNC:30967	protein_coding	YES	deleterious(0)
11:55308917	T	ENSCAFG00000002469	ENSCAFT00000003885	Transcript	missense_variant	794	794	265	S/F	tCc/tTc	-	-	1	NANS	HGNC	HGNC:19237	protein_coding	YES	deleterious(0.03)
11:55404975	A	ENSCAFG00000002483	ENSCAFT00000003919	Transcript	missense_variant	2802	2618	873	P/L	cCt/cTt	-	-	-1	TBC1D2	HGNC	HGNC:18026	protein_coding	YES	deleterious(0)
11:56079975	G	ENSCAFG00000002525	ENSCAFT00000003985	Transcript	missense_variant	1193	1193	398	E/G	gAa/gGa	-	-	1	COL15A1	HGNC	HGNC:2192	protein_coding	YES	deleterious(0)
11:56280096	C	ENSCAFG00000002533	ENSCAFT00000003996	Transcript	frameshift_variant,feature_elongation	114-115	13-14	5	-	-	-	-	1	SEC61B	Uniprot_gn	-	protein_coding	YES	-
11:56963386	A	ENSCAFG00000002542	ENSCAFT00000004017	Transcript	missense_variant	848	848	283	S/F	tCt/tTt	-	-	-1	-	-	-	protein_coding	YES	deleterious(0.01)
11:571804	T	ENSCAFG00000012657	ENSCAFT00000020089	Transcript	missense_variant	1127	1127	376	G/E	gGa/gAa	-	-	-1	IFGGB1	Uniprot_gn	-	protein_coding	YES	deleterious(0)
11:57426271	T	ENSCAFG00000002577	ENSCAFT00000004058	Transcript	missense_variant	823	823	275	P/S	Cct/Tct	-	-	1	-	-	-	protein_coding	YES	deleterious(0.03)
11:57448330	T	ENSCAFG00000002577	ENSCAFT00000004058	Transcript	missense_variant	1160	1160	387	T/M	aCg/aTg	-	-	1	-	-	-	protein_coding	YES	deleterious(0.04)
11:58064109	A	ENSCAFG00000002586	ENSCAFT00000004066	Transcript	missense_variant	1059	735	245	N/K	aaT/aaA	-	-	1	-	-	-	protein_coding	YES	deleterious(0.04)
11:58245194	A	ENSCAFG00000002607	ENSCAFT00000004109	Transcript	missense_variant	537	187	63	D/N	Gat/Aat	-	-	1	RNF20	HGNC	HGNC:10062	protein_coding	YES	deleterious(0.01)
11:58421164	A	ENSCAFG00000002617	ENSCAFT00000004119	Transcript	missense_variant	598	598	200	P/S	Ccc/Tcc	-	-	-1	GRIN3A	HGNC	HGNC:16767	protein_coding	YES	deleterious(0.01)
11:59245222	A	ENSCAFG00000002624	ENSCAFT00000049333	Transcript	frameshift_variant,feature_elongation	517-518	517-518	173	-	-	-	-	1	CYLC2	HGNC	HGNC:2583	protein_coding	YES	-
11:60129755-60129756	-	ENSCAFG00000002661	ENSCAFT00000004208	Transcript	frameshift_variant,feature_truncation	2671	2245	749	-	-	-	-	1	SMC2	HGNC	HGNC:14011	protein_coding	YES	-
11:60148298	A	ENSCAFG00000002661	ENSCAFT00000004208	Transcript	missense_variant	3784	3358	1120	D/N	Gac/Aac	-	-	1	SMC2	HGNC	HGNC:14011	protein_coding	YES	deleterious(0)
11:60158670	G	ENSCAFG00000029709	ENSCAFT00000045151	Transcript	missense_variant	144	105	35	D/E	gaT/gaG	-	-	1	-	-	-	protein_coding	YES	deleterious(0.01)
11:60565491-60565492	-	ENSCAFG00000031077	ENSCAFT00000004232	Transcript	frameshift_variant,feature_truncation	909	909	303	-	-	-	-	-1	OR13F1	EntrezGene	HGNC:14723	protein_coding	YES	-
11:60627065	A	ENSCAFG00000032686	ENSCAFT00000045993	Transcript	missense_variant	686	686	229	P/L	cCt/cTt	-	-	-1	COR13C13	EntrezGene	-	protein_coding	YES	deleterious(0.01)
11:60765111	T	ENSCAFG00000002727	ENSCAFT00000004346	Transcript	missense_variant	6742	6664	2222	A/T	Gcc/Acc	-	-	-1	ABCA1	HGNC	HGNC:29	protein_coding	YES	deleterious(0)
11:60776120	A	ENSCAFG00000002727	ENSCAFT00000004346	Transcript	missense_variant	5264	5186	1729	S/F	tCc/tTc	-	-	-1	ABCA1	HGNC	HGNC:29	protein_coding	YES	deleterious(0)
11:60794424	T	ENSCAFG00000002727	ENSCAFT00000004346	Transcript	stop_gained	3699	3621	1207	Y/*	taC/taA	-	-	-1	ABCA1	HGNC	HGNC:29	protein_coding	YES	-
11:61184987	G	ENSCAFG00000002758	ENSCAFT00000004413	Transcript	stop_gained	186	186	62	Y/*	taC/taG	-	-	1	SLC44A1	HGNC	HGNC:18798	protein_coding	YES	-
11:6120698	A	ENSCAFG00000000192	ENSCAFT00000000309	Transcript	missense_variant	2440	2402	801	T/M	aCg/aTg	-	-	-1	SEMA6A	HGNC	HGNC:10738	protein_coding	YES	deleterious(0.03)
11:61344624	G	ENSCAFG00000002767	ENSCAFT00000004421	Transcript	missense_variant	291	291	97	S/R	agT/agG	-	-	1	FSD1L	HGNC	HGNC:13753	protein_coding	YES	deleterious(0.01)
11:6163792	T	ENSCAFG00000000192	ENSCAFT00000000309	Transcript	missense_variant	520	482	161	G/E	gGa/gAa	-	-	-1	SEMA6A	HGNC	HGNC:10738	protein_coding	YES	deleterious(0)
11:62456402	A	ENSCAFG00000002774	ENSCAFT00000004432	Transcript	stop_gained	1001	774	258	W/*	tgG/tgA	-	-	1	ZNF462	HGNC	HGNC:21684	protein_coding	YES	-
11:62457174	T	ENSCAFG00000002774	ENSCAFT00000004432	Transcript	stop_gained	1773	1546	516	E/*	Gaa/Taa	-	-	1	ZNF462	HGNC	HGNC:21684	protein_coding	YES	-
11:62884922	C	ENSCAFG00000002797	ENSCAFT00000004467	Transcript	missense_variant	1242	604	202	P/A	Ccc/Gcc	-	-	-1	KLF4	HGNC	HGNC:6348	protein_coding	YES	deleterious(0.01)
11:64028784-64028785	-	ENSCAFG00000002799	ENSCAFT00000004471	Transcript	frameshift_variant,feature_truncation	673	673	225	-	-	-	-	-1	ACTL7B	HGNC	HGNC:162	protein_coding	YES	-
11:64029082	A	ENSCAFG00000002799	ENSCAFT00000004471	Transcript	missense_variant	376	376	126	P/S	Ccc/Tcc	-	-	-1	ACTL7B	HGNC	HGNC:162	protein_coding	YES	deleterious(0.04)
11:64080490	A	ENSCAFG00000002818	ENSCAFT00000004523	Transcript	missense_variant	1049	1036	346	L/F	Ctt/Ttt	-	-	-1	IKBKAP	HGNC	HGNC:5959	protein_coding	YES	deleterious(0.05)
11:64492514	A	ENSCAFG00000002868	ENSCAFT00000004599	Transcript	missense_variant	2645	2489	830	S/F	tCc/tTc	-	-	-1	PTPN3	HGNC	HGNC:9655	protein_coding	YES	deleterious(0.03)
11:65317703	A	ENSCAFG00000002928	ENSCAFT00000046390	Transcript	missense_variant	10664	10664	3555	A/V	gCt/gTt	-	-	-1	SVEP1	HGNC	HGNC:15985	protein_coding	YES	deleterious(0.03)
11:65329433	A	ENSCAFG00000002928	ENSCAFT00000046390	Transcript	missense_variant	10208	10208	3403	T/M	aCg/aTg	-	-	-1	SVEP1	HGNC	HGNC:15985	protein_coding	YES	deleterious(0)
11:65380886	T	ENSCAFG00000002928	ENSCAFT00000046390	Transcript	stop_gained	4364	4364	1455	W/*	tGg/tAg	-	-	-1	SVEP1	HGNC	HGNC:15985	protein_coding	YES	-
11:65571927	C	ENSCAFG00000032331	ENSCAFT00000045028	Transcript	missense_variant	701	500	167	Y/S	tAt/tCt	-	-	1	-	-	-	protein_coding	YES	deleterious(0.04)
11:65631397	G	ENSCAFG00000029667	ENSCAFT00000050087	Transcript	missense_variant	155	89	30	Q/R	cAg/cGg	-	-	1	-	-	-	protein_coding	YES	deleterious(0)
11:65746184	A	ENSCAFG00000002978	ENSCAFT00000004772	Transcript	missense_variant	763	763	255	R/W	Cgg/Tgg	-	-	-1	LPAR1	HGNC	HGNC:3166	protein_coding	YES	deleterious(0)
11:66198925	T	ENSCAFG00000003000	ENSCAFT00000004823	Transcript	missense_variant	719	709	237	A/T	Gct/Act	-	-	-1	PTGR1	HGNC	HGNC:18429	protein_coding	YES	deleterious(0.03)
11:66234964	A	ENSCAFG00000003006	ENSCAFT00000004824	Transcript	stop_gained	321	321	107	Y/*	taC/taA	-	-	1	DNAJC25	EntrezGene	-	protein_coding	YES	-
11:66291237	T	ENSCAFG00000003008	ENSCAFT00000037679	Transcript	missense_variant	3186	3047	1016	R/Q	cGa/cAa	-	-	-1	C9orf84	HGNC	HGNC:26535	protein_coding	YES	deleterious(0)
11:66732948	T	ENSCAFG00000003015	ENSCAFT00000004839	Transcript	missense_variant	1372	1372	458	D/N	Gat/Aat	-	-	-1	PTBP3	HGNC	HGNC:10253	protein_coding	YES	deleterious(0)
11:66847265-66847266	-	ENSCAFG00000032333	ENSCAFT00000046680	Transcript	frameshift_variant,feature_truncation	40	40	14	-	-	-	-	1	-	-	-	protein_coding	YES	-
11:67035193	ACTTGCTTTGCTAGCTTTCCGGCCTTTATTACTCTCAGAAAGAT	ENSCAFG00000003043	ENSCAFT00000004893	Transcript	frameshift_variant,feature_elongation	1094-1095	1094-1095	365	-	-	-	-	1	KIAA1958	HGNC	HGNC:23427	protein_coding	YES	-
11:67443603	T	ENSCAFG00000028890	ENSCAFT00000044500	Transcript	missense_variant	1334	1171	391	P/T	Ccc/Acc	-	-	-1	ZFP37	HGNC	HGNC:12863	protein_coding	YES	deleterious(0)
11:67444210	T	ENSCAFG00000028890	ENSCAFT00000044500	Transcript	frameshift_variant,feature_elongation	726-727	563-564	188	-	-	-	-	-1	ZFP37	HGNC	HGNC:12863	protein_coding	YES	-
11:67725992	A	ENSCAFG00000003242	ENSCAFT00000005196	Transcript	missense_variant	854	854	285	R/H	cGt/cAt	-	-	1	BSPRY	HGNC	HGNC:18232	protein_coding	YES	deleterious(0)
11:67742217	A	ENSCAFG00000003246	ENSCAFT00000005204	Transcript	missense_variant	927	927	309	E/D	gaG/gaT	-	-	-1	ALAD	HGNC	HGNC:395	protein_coding	YES	deleterious(0.01)
11:68329840	G	ENSCAFG00000003282	ENSCAFT00000005278	Transcript	missense_variant	2195	2195	732	V/G	gTa/gGa	-	-	1	ZNF618	HGNC	HGNC:29416	protein_coding	YES	deleterious(0.01)
11:68339825	C	ENSCAFG00000003303	ENSCAFT00000005291	Transcript	missense_variant	823	823	275	K/E	Aag/Gag	-	-	-1	AMBP	HGNC	HGNC:453	protein_coding	YES	deleterious(0)
11:68339845	T	ENSCAFG00000003303	ENSCAFT00000005291	Transcript	missense_variant	803	803	268	G/E	gGg/gAg	-	-	-1	AMBP	HGNC	HGNC:453	protein_coding	YES	deleterious(0.04)
11:68478098	T	ENSCAFG00000003327	ENSCAFT00000005319	Transcript	missense_variant	2976	788	263	P/L	cCc/cTc	-	-	1	COL27A1	HGNC	HGNC:22986	protein_coding	YES	deleterious(0)
11:68484136	A	ENSCAFG00000003327	ENSCAFT00000005319	Transcript	missense_variant	3141	953	318	G/E	gGa/gAa	-	-	1	COL27A1	HGNC	HGNC:22986	protein_coding	YES	deleterious(0)
11:68544753	T	ENSCAFG00000003327	ENSCAFT00000005319	Transcript	missense_variant	6086	3898	1300	R/C	Cgc/Tgc	-	-	1	COL27A1	HGNC	HGNC:22986	protein_coding	YES	deleterious(0.01)
11:68569255	G	ENSCAFG00000003340	ENSCAFT00000005347	Transcript	frameshift_variant,feature_elongation	3521-3522	3521-3522	1174	-	-	-	-	-1	AKNA	HGNC	HGNC:24108	protein_coding	YES	-
11:68593914	T	ENSCAFG00000003340	ENSCAFT00000005347	Transcript	missense_variant	923	923	308	S/N	aGc/aAc	-	-	-1	AKNA	HGNC	HGNC:24108	protein_coding	YES	deleterious(0.01)
11:68632276	A	ENSCAFG00000003344	ENSCAFT00000005356	Transcript	missense_variant	1890	1684	562	R/W	Cgg/Tgg	-	-	-1	DFNB31	HGNC	HGNC:16361	protein_coding	YES	deleterious(0)
11:68893272	T	ENSCAFG00000003362	ENSCAFT00000005393	Transcript	missense_variant	586	586	196	E/K	Gag/Aag	-	-	-1	TNFSF15	HGNC	HGNC:11931	protein_coding	YES	deleterious(0.03)
11:69006451	A	ENSCAFG00000003367	ENSCAFT00000005399	Transcript	missense_variant	903	130	44	T/S	Acg/Tcg	-	-	-1	TNFSF8	HGNC	HGNC:11938	protein_coding	YES	deleterious(0)
11:69078177	A	ENSCAFG00000003426	ENSCAFT00000047096	Transcript	missense_variant	7564	7141	2381	R/C	Cgc/Tgc	-	-	-1	TNC	HGNC	HGNC:5318	protein_coding	YES	deleterious(0)
11:69116470	T	ENSCAFG00000003426	ENSCAFT00000047096	Transcript	missense_variant	4226	3803	1268	R/H	cGc/cAc	-	-	-1	TNC	HGNC	HGNC:5318	protein_coding	YES	deleterious(0.03)
11:69117234	T	ENSCAFG00000003426	ENSCAFT00000047096	Transcript	missense_variant	4067	3644	1215	G/E	gGa/gAa	-	-	-1	TNC	HGNC	HGNC:5318	protein_coding	YES	deleterious(0)
11:69137842	T	ENSCAFG00000003426	ENSCAFT00000047096	Transcript	missense_variant	1306	883	295	V/M	Gtg/Atg	-	-	-1	TNC	HGNC	HGNC:5318	protein_coding	YES	deleterious(0.02)
11:70047890	T	ENSCAFG00000003488	ENSCAFT00000005614	Transcript	missense_variant	1529	1529	510	T/M	aCg/aTg	-	-	1	PAPPA	HGNC	HGNC:8602	protein_coding	YES	deleterious(0)
11:70165560	T	ENSCAFG00000003488	ENSCAFT00000005614	Transcript	missense_variant	3449	3449	1150	P/L	cCa/cTa	-	-	1	PAPPA	HGNC	HGNC:8602	protein_coding	YES	deleterious(0)
11:70398308	T	ENSCAFG00000003504	ENSCAFT00000005650	Transcript	missense_variant	2749	2749	917	D/N	Gac/Aac	-	-	-1	ASTN2	HGNC	HGNC:17021	protein_coding	YES	deleterious(0.01)
11:70432436	T	ENSCAFG00000003504	ENSCAFT00000005650	Transcript	missense_variant	2351	2351	784	R/H	cGt/cAt	-	-	-1	ASTN2	HGNC	HGNC:17021	protein_coding	YES	deleterious(0.03)
11:70761462	T	ENSCAFG00000003504	ENSCAFT00000005650	Transcript	missense_variant	737	737	246	S/Y	tCc/tAc	-	-	-1	ASTN2	HGNC	HGNC:17021	protein_coding	YES	deleterious(0)
11:71365646	C	ENSCAFG00000003518	ENSCAFT00000005653	Transcript	missense_variant	1864	1565	522	L/P	cTt/cCt	-	-	1	TLR4	EntrezGene	-	protein_coding	YES	deleterious(0)
11:73565570	A	ENSCAFG00000003560	ENSCAFT00000005724	Transcript	stop_gained	4543	4360	1454	Q/*	Cag/Tag	-	-	-1	CDK5RAP2	HGNC	HGNC:18672	protein_coding	YES	-
11:73616202	A	ENSCAFG00000003560	ENSCAFT00000005724	Transcript	missense_variant	2042	1859	620	S/L	tCg/tTg	-	-	-1	CDK5RAP2	HGNC	HGNC:18672	protein_coding	YES	deleterious(0.01)
11:73954234	A	ENSCAFG00000003591	ENSCAFT00000005779	Transcript	missense_variant	4976	4976	1659	T/M	aCg/aTg	-	-	-1	C5	Uniprot_gn	-	protein_coding	YES	deleterious(0.01)
11:74120004	T	ENSCAFG00000003608	ENSCAFT00000005822	Transcript	stop_gained	2155	2155	719	E/*	Gaa/Taa	-	-	1	CNTRL	HGNC	HGNC:1858	protein_coding	YES	-
11:807616	T	ENSCAFG00000000498	ENSCAFT00000000784	Transcript	missense_variant	1665	1665	555	M/I	atG/atA	-	-	-1	-	-	-	protein_coding	YES	deleterious(0)
11:8507123	T	ENSCAFG00000000167	ENSCAFT00000000273	Transcript	missense_variant	6638	6638	2213	A/V	gCc/gTc	-	-	1	DMXL1	HGNC	HGNC:2937	protein_coding	YES	deleterious(0)
11:861080	T	ENSCAFG00000000498	ENSCAFT00000000784	Transcript	missense_variant	751	751	251	E/K	Gag/Aag	-	-	-1	-	-	-	protein_coding	YES	deleterious(0.05)
11:976040	T	ENSCAFG00000000494	ENSCAFT00000000780	Transcript	missense_variant	608	608	203	R/Q	cGg/cAg	-	-	-1	-	-	-	protein_coding	YES	deleterious(0.01)
11:976561-976563	-	ENSCAFG00000000494	ENSCAFT00000000780	Transcript	frameshift_variant,feature_truncation	85-86	85-86	29	-	-	-	-	-1	-	-	-	protein_coding	YES	-
12:10055545-10055546	-	ENSCAFG00000001593	ENSCAFT00000002496	Transcript	frameshift_variant,feature_truncation	1232	707	236	-	-	-	-	1	NCR2	HGNC	HGNC:6732	protein_coding	YES	-
12:1021687	A	ENSCAFG00000000492	ENSCAFT00000000791	Transcript	stop_gained	4	4	2	R/*	Cga/Tga	-	-	-1	DLA88	Uniprot_gn	-	protein_coding	YES	-
12:10280686	T	ENSCAFG00000001596	ENSCAFT00000002501	Transcript	missense_variant	837	821	274	S/F	tCc/tTc	-	-	1	FOXP4	HGNC	HGNC:20842	protein_coding	YES	deleterious(0.02)
12:1119270-1119271	-	ENSCAFG00000000533	ENSCAFT00000000874	Transcript	frameshift_variant,feature_truncation	2832	2769	923	-	-	-	-	1	PRRC2A	HGNC	HGNC:13918	protein_coding	YES	-
12:1120457-1120460	-	ENSCAFG00000000533	ENSCAFT00000000874	Transcript	inframe_deletion	4019-4021	3956-3958	1319-1320	SP/S	tCTCct/tct	-	-	1	PRRC2A	HGNC	HGNC:13918	protein_coding	YES	-
12:11267097	T	ENSCAFG00000001697	ENSCAFT00000002679	Transcript	missense_variant	3160	3160	1054	R/W	Cgg/Tgg	-	-	1	UBR2	HGNC	HGNC:21289	protein_coding	YES	deleterious(0)
12:1131443-1131444	-	ENSCAFG00000000575	ENSCAFT00000000906	Transcript	frameshift_variant,feature_truncation	1566	1566	522	-	-	-	-	-1	BAG6	HGNC	HGNC:13919	protein_coding	YES	-
12:11334054	C	ENSCAFG00000001723	ENSCAFT00000002699	Transcript	missense_variant	660	660	220	N/K	aaT/aaG	-	-	-1	TBCC	HGNC	HGNC:11580	protein_coding	YES	deleterious(0.02)
12:11538831-11538832	-	ENSCAFG00000001753	ENSCAFT00000002747	Transcript	frameshift_variant,feature_truncation	1570	1435	479	-	-	-	-	1	PPP2R5D	HGNC	HGNC:9312	protein_coding	YES	-
12:11567552	T	ENSCAFG00000001774	ENSCAFT00000002791	Transcript	missense_variant	2665	2665	889	E/K	Gag/Aag	-	-	-1	CUL7	HGNC	HGNC:21024	protein_coding	YES	deleterious(0)
12:11573116	A	ENSCAFG00000001774	ENSCAFT00000002791	Transcript	missense_variant	80	80	27	R/L	cGc/cTc	-	-	-1	CUL7	HGNC	HGNC:21024	protein_coding	YES	deleterious(0.03)
12:11635401	T	ENSCAFG00000001814	ENSCAFT00000002860	Transcript	missense_variant	277	277	93	R/W	Cgg/Tgg	-	-	1	PTK7	HGNC	HGNC:9618	protein_coding	YES	deleterious(0.02)
12:11752784	A	ENSCAFG00000001839	ENSCAFT00000044946	Transcript	missense_variant	1730	1730	577	L/Q	cTg/cAg	-	-	1	TTBK1	HGNC	HGNC:19140	protein_coding	YES	deleterious(0)
12:11773484	A	ENSCAFG00000001839	ENSCAFT00000044946	Transcript	missense_variant	3485	3485	1162	R/H	cGc/cAc	-	-	1	TTBK1	HGNC	HGNC:19140	protein_coding	YES	deleterious(0.02)
12:11830613-11830614	-	ENSCAFG00000001847	ENSCAFT00000002912	Transcript	frameshift_variant,feature_truncation	2096	2096	699	-	-	-	-	-1	ZNF318	HGNC	HGNC:13578	protein_coding	YES	-
12:11830870	T	ENSCAFG00000001847	ENSCAFT00000002912	Transcript	missense_variant	1840	1840	614	A/T	Gcc/Acc	-	-	-1	ZNF318	HGNC	HGNC:13578	protein_coding	YES	deleterious(0.02)
12:1186729	A	ENSCAFG00000000610	ENSCAFT00000000936	Transcript	stop_gained	360	360	120	W/*	tgG/tgA	-	-	1	-	-	-	protein_coding	YES	-
12:1186895	A	ENSCAFG00000000610	ENSCAFT00000000936	Transcript	missense_variant	443	443	148	C/Y	tGc/tAc	-	-	1	-	-	-	protein_coding	YES	deleterious(0)
12:11918723	T	ENSCAFG00000001853	ENSCAFT00000042912	Transcript	missense_variant	266	266	89	A/V	gCc/gTc	-	-	1	-	-	-	protein_coding	YES	deleterious(0.01)
12:11921884	A	ENSCAFG00000001858	ENSCAFT00000002940	Transcript	missense_variant	175	175	59	R/C	Cgc/Tgc	-	-	-1	DLK2	HGNC	HGNC:21113	protein_coding	YES	deleterious(0)
12:11977342	A	ENSCAFG00000001868	ENSCAFT00000002960	Transcript	stop_gained	154	154	52	E/*	Gaa/Taa	-	-	-1	YIPF3	HGNC	HGNC:21023	protein_coding	YES	-
12:1198320	T	ENSCAFG00000000614	ENSCAFT00000000941	Transcript	missense_variant	359	359	120	G/D	gGc/gAc	-	-	-1	LY6G6C	HGNC	HGNC:13936	protein_coding	YES	deleterious(0)
12:12042024	C	ENSCAFG00000001910	ENSCAFT00000003028	Transcript	missense_variant	111	107	36	V/A	gTt/gCt	-	-	1	POLH	HGNC	HGNC:9181	protein_coding	YES	deleterious(0.01)
12:12045411	T	ENSCAFG00000001910	ENSCAFT00000003028	Transcript	missense_variant	335	331	111	R/C	Cgt/Tgt	-	-	1	POLH	HGNC	HGNC:9181	protein_coding	YES	deleterious(0)
12:1206769	A	ENSCAFG00000000617	ENSCAFT00000000953	Transcript	missense_variant	679	679	227	R/C	Cgt/Tgt	-	-	-1	DDAH2	HGNC	HGNC:2716	protein_coding	YES	deleterious(0.01)
12:1206778	A	ENSCAFG00000000617	ENSCAFT00000000953	Transcript	missense_variant	670	670	224	L/F	Ctc/Ttc	-	-	-1	DDAH2	HGNC	HGNC:2716	protein_coding	YES	deleterious(0.01)
12:12105544	G	ENSCAFG00000001924	ENSCAFT00000038133	Transcript	missense_variant	620	502	168	L/V	Ctc/Gtc	-	-	1	RSPH9	HGNC	HGNC:21057	protein_coding	YES	deleterious(0.01)
12:1238271	T	ENSCAFG00000000626	ENSCAFT00000000966	Transcript	missense_variant	1420	1420	474	R/C	Cgc/Tgc	-	-	1	MSH5	Uniprot_gn	-	protein_coding	YES	deleterious(0.03)
12:12587501	G	ENSCAFG00000001960	ENSCAFT00000003123	Transcript	missense_variant	152	152	51	A/G	gCt/gGt	-	-	1	CAPN11	HGNC	HGNC:1478	protein_coding	YES	deleterious(0.01)
12:12591442	T	ENSCAFG00000001960	ENSCAFT00000003123	Transcript	missense_variant	593	593	198	T/I	aCa/aTa	-	-	1	CAPN11	HGNC	HGNC:1478	protein_coding	YES	deleterious(0.01)
12:1282020	A	ENSCAFG00000000639	ENSCAFT00000000983	Transcript	missense_variant	1378	1378	460	R/C	Cgt/Tgt	-	-	-1	HSPA1L	HGNC	HGNC:5234	protein_coding	YES	deleterious(0)
12:13238872	A	ENSCAFG00000002002	ENSCAFT00000003172	Transcript	missense_variant	856	856	286	R/C	Cgc/Tgc	-	-	-1	SUPT3H	HGNC	HGNC:11466	protein_coding	YES	deleterious(0)
12:1424305	T	ENSCAFG00000000679	ENSCAFT00000001053	Transcript	missense_variant	3814	3580	1194	G/C	Ggc/Tgc	-	-	1	SKIV2L	HGNC	HGNC:10898	protein_coding	YES	deleterious(0)
12:14362841	A	ENSCAFG00000002020	ENSCAFT00000003193	Transcript	missense_variant	982	929	310	R/Q	cGa/cAa	-	-	1	ENPP4	HGNC	HGNC:3359	protein_coding	YES	deleterious(0)
12:1438034	T	ENSCAFG00000000701	ENSCAFT00000001104	Transcript	missense_variant	1868	1868	623	S/F	tCc/tTc	-	-	1	-	-	-	protein_coding	YES	deleterious(0)
12:14802076	T	ENSCAFG00000002026	ENSCAFT00000003209	Transcript	missense_variant	403	265	89	E/K	Gag/Aag	-	-	-1	CYP39A1	HGNC	HGNC:17449	protein_coding	YES	deleterious(0.02)
12:14818619-14818622	-	ENSCAFG00000002029	ENSCAFT00000003221	Transcript	inframe_deletion	13-15	13-15	5	E/-	GAG/-	-	-	1	SLC25A27	Uniprot_gn	-	protein_coding	YES	-
12:14818619-14818622	-	ENSCAFG00000002029	ENSCAFT00000042875	Transcript	inframe_deletion	225-227	13-15	5	E/-	GAG/-	-	-	1	SLC25A27	Uniprot_gn	-	protein_coding	-	-
12:14850390	T	ENSCAFG00000002036	ENSCAFT00000003223	Transcript	missense_variant	283	283	95	R/C	Cgc/Tgc	-	-	1	TDRD6	HGNC	HGNC:21339	protein_coding	YES	deleterious(0.03)
12:14853682	T	ENSCAFG00000002036	ENSCAFT00000003223	Transcript	missense_variant	3575	3575	1192	R/I	aGa/aTa	-	-	1	TDRD6	HGNC	HGNC:21339	protein_coding	YES	deleterious(0.03)
12:14877953	T	ENSCAFG00000002037	ENSCAFT00000035365	Transcript	missense_variant	495	461	154	G/E	gGa/gAa	-	-	-1	PLA2G7	HGNC	HGNC:9040	protein_coding	YES	deleterious(0)
12:14919852-14919856	-	ENSCAFG00000028803	ENSCAFT00000044617	Transcript	splice_donor_variant,5_prime_UTR_variant,intron_variant,feature_truncation	217-?	-	-	-	-	-	-	1	ANKRD66	HGNC	HGNC:44669	protein_coding	YES	-
12:15019715	A	ENSCAFG00000002054	ENSCAFT00000003267	Transcript	missense_variant,splice_region_variant	3690	3690	1230	K/N	aaG/aaT	-	-	-1	GPR116	HGNC	HGNC:19030	protein_coding	YES	deleterious(0)
12:15053397	A	ENSCAFG00000002054	ENSCAFT00000003267	Transcript	missense_variant	119	119	40	T/I	aCa/aTa	-	-	-1	GPR116	HGNC	HGNC:19030	protein_coding	YES	deleterious(0)
12:1515687	A	ENSCAFG00000000761	ENSCAFT00000001189	Transcript	missense_variant	1582	1426	476	L/F	Ctc/Ttc	-	-	-1	ATF6B	HGNC	HGNC:2349	protein_coding	YES	deleterious(0)
12:15161655	G	ENSCAFG00000002068	ENSCAFT00000003280	Transcript	missense_variant	2747	2747	916	G/A	gGt/gCt	-	-	-1	GPR110	HGNC	HGNC:18990	protein_coding	YES	deleterious(0.05)
12:1547687	T	ENSCAFG00000000764	ENSCAFT00000001192	Transcript	missense_variant	317	317	106	R/H	cGc/cAc	-	-	-1	PRRT1	HGNC	HGNC:13943	protein_coding	YES	deleterious(0.02)
12:1552725	C	ENSCAFG00000000766	ENSCAFT00000048253	Transcript	splice_acceptor_variant	-	-	-	-	-	-	-	1	PPT2-EGFL8	HGNC	HGNC:48343	protein_coding	YES	-
12:15633144-15633149	-	ENSCAFG00000002089	ENSCAFT00000003306	Transcript	frameshift_variant,splice_region_variant,feature_truncation	1204-1208	941-945	314-315	-	-	-	-	1	CD2AP	HGNC	HGNC:14258	protein_coding	YES	-
12:15761351	C	ENSCAFG00000002095	ENSCAFT00000003313	Transcript	missense_variant	562	562	188	Y/H	Tat/Cat	-	-	1	GPR115	HGNC	HGNC:19011	protein_coding	YES	deleterious(0)
12:1591541	C	ENSCAFG00000000791	ENSCAFT00000001228	Transcript	missense_variant	3967	3967	1323	R/G	Agg/Ggg	-	-	-1	NOTCH4	HGNC	HGNC:7884	protein_coding	YES	deleterious(0)
12:16042053	A	ENSCAFG00000002100	ENSCAFT00000003323	Transcript	missense_variant	761	761	254	C/F	tGt/tTt	-	-	-1	PTCHD4	HGNC	HGNC:21345	protein_coding	YES	deleterious(0.01)
12:165373	A	ENSCAFG00000000367	ENSCAFT00000000580	Transcript	missense_variant	329	329	110	S/F	tCc/tTc	-	-	-1	ENPP3	HGNC	HGNC:3358	protein_coding	YES	deleterious(0.04)
12:17326409	T	ENSCAFG00000002111	ENSCAFT00000003350	Transcript	splice_donor_variant	-	-	-	-	-	-	-	-1	MUT	HGNC	HGNC:7526	protein_coding	YES	-
12:17366959	A	ENSCAFG00000002127	ENSCAFT00000003355	Transcript	missense_variant	115	115	39	P/T	Ccc/Acc	-	-	1	GLYATL3	HGNC	HGNC:21349	protein_coding	YES	deleterious(0.01)
12:17442130	C	ENSCAFG00000002141	ENSCAFT00000003370	Transcript	missense_variant	652	640	214	H/D	Cac/Gac	-	-	-1	RHAG	Uniprot_gn	-	protein_coding	YES	deleterious(0)
12:17444351	C	ENSCAFG00000002141	ENSCAFT00000003370	Transcript	missense_variant	482	470	157	I/S	aTc/aGc	-	-	-1	RHAG	Uniprot_gn	-	protein_coding	YES	deleterious(0)
12:18549035	A	ENSCAFG00000002156	ENSCAFT00000003387	Transcript	missense_variant	138	88	30	H/N	Cac/Aac	-	-	1	TFAP2B	Uniprot_gn	-	protein_coding	YES	deleterious(0.04)
12:19406465	A	ENSCAFG00000002165	ENSCAFT00000003416	Transcript	missense_variant	10117	9608	3203	A/V	gCc/gTc	-	-	-1	PKHD1	HGNC	HGNC:9016	protein_coding	YES	deleterious(0)
12:19548179	T	ENSCAFG00000002165	ENSCAFT00000003416	Transcript	missense_variant	7426	6917	2306	G/E	gGa/gAa	-	-	-1	PKHD1	HGNC	HGNC:9016	protein_coding	YES	deleterious(0)
12:19699535	A	ENSCAFG00000002165	ENSCAFT00000003416	Transcript	missense_variant	3583	3074	1025	P/L	cCt/cTt	-	-	-1	PKHD1	HGNC	HGNC:9016	protein_coding	YES	deleterious(0)
12:19700579	T	ENSCAFG00000002165	ENSCAFT00000003416	Transcript	missense_variant	3247	2738	913	P/Q	cCa/cAa	-	-	-1	PKHD1	HGNC	HGNC:9016	protein_coding	YES	deleterious(0.01)
12:19702901	A	ENSCAFG00000002165	ENSCAFT00000003416	Transcript	missense_variant	3064	2555	852	S/F	tCc/tTc	-	-	-1	PKHD1	HGNC	HGNC:9016	protein_coding	YES	deleterious(0.02)
12:19710416	T	ENSCAFG00000002165	ENSCAFT00000003416	Transcript	missense_variant	2631	2122	708	D/N	Gac/Aac	-	-	-1	PKHD1	HGNC	HGNC:9016	protein_coding	YES	deleterious(0.01)
12:20085014	T	ENSCAFG00000002210	ENSCAFT00000003474	Transcript	missense_variant	631	631	211	P/S	Cct/Tct	-	-	1	EFHC1	HGNC	HGNC:16406	protein_coding	YES	deleterious(0.02)
12:20541204	A	ENSCAFG00000002264	ENSCAFT00000003559	Transcript	missense_variant	962	962	321	C/Y	tGc/tAc	-	-	1	FBXO9	HGNC	HGNC:13588	protein_coding	YES	deleterious(0)
12:20623952	A	ENSCAFG00000002273	ENSCAFT00000003568	Transcript	missense_variant	1272	1073	358	P/L	cCa/cTa	-	-	-1	GCM1	HGNC	HGNC:4197	protein_coding	YES	deleterious(0.01)
12:20627154	T	ENSCAFG00000002273	ENSCAFT00000003568	Transcript	stop_gained	610	411	137	W/*	tgG/tgA	-	-	-1	GCM1	HGNC	HGNC:4197	protein_coding	YES	-
12:21160267	T	ENSCAFG00000002300	ENSCAFT00000003609	Transcript	missense_variant	365	261	87	H/Q	caC/caA	-	-	-1	KLHL31	HGNC	HGNC:21353	protein_coding	YES	deleterious(0)
12:21825456	T	ENSCAFG00000002322	ENSCAFT00000003638	Transcript	missense_variant	1356	1235	412	A/V	gCt/gTt	-	-	1	TINAG	HGNC	HGNC:14599	protein_coding	YES	deleterious(0)
12:2225056	T	ENSCAFG00000000812	ENSCAFT00000001272	Transcript	missense_variant	289	289	97	V/F	Gtt/Ttt	-	-	1	DLA-DQA	Uniprot_gn	-	protein_coding	YES	deleterious(0)
12:2225333	T	ENSCAFG00000000812	ENSCAFT00000001272	Transcript	missense_variant	566	566	189	S/F	tCc/tTc	-	-	1	DLA-DQA	Uniprot_gn	-	protein_coding	YES	deleterious(0.04)
12:22338136	ACA	ENSCAFG00000002327	ENSCAFT00000003643	Transcript	inframe_insertion	3457-3458	2953-2954	985	Y/YN	tac/tACAac	-	-	1	FAM83B	HGNC	HGNC:21357	protein_coding	YES	-
12:22603815	T	ENSCAFG00000002328	ENSCAFT00000003647	Transcript	missense_variant	957	659	220	P/L	cCc/cTc	-	-	1	HCRTR2	Uniprot_gn	-	protein_coding	YES	deleterious(0.04)
12:22617521	A	ENSCAFG00000002328	ENSCAFT00000003647	Transcript	missense_variant	1197	899	300	R/Q	cGg/cAg	-	-	1	HCRTR2	Uniprot_gn	-	protein_coding	YES	deleterious(0)
12:22662214	A	ENSCAFG00000002331	ENSCAFT00000046489	Transcript	stop_gained	348	348	116	W/*	tgG/tgA	-	-	1	GFRAL	HGNC	HGNC:32789	protein_coding	YES	-
12:22753718	C	ENSCAFG00000002341	ENSCAFT00000003666	Transcript	missense_variant	800	800	267	L/W	tTg/tGg	-	-	-1	HMGCLL1	HGNC	HGNC:21359	protein_coding	YES	deleterious(0)
12:23201393	T	ENSCAFG00000002345	ENSCAFT00000003670	Transcript	missense_variant	758	34	12	V/M	Gtg/Atg	-	-	-1	BMP5	HGNC	HGNC:1072	protein_coding	YES	deleterious(0.04)
12:23201425	T	ENSCAFG00000002345	ENSCAFT00000003670	Transcript	frameshift_variant,feature_elongation	725-726	1-2	1	-	-	-	-	-1	BMP5	HGNC	HGNC:1072	protein_coding	YES	-
12:235772	T	ENSCAFG00000000380	ENSCAFT00000000597	Transcript	missense_variant	4667	3719	1240	P/L	cCt/cTt	-	-	1	MED23	HGNC	HGNC:2372	protein_coding	YES	deleterious(0)
12:23839485	A	ENSCAFG00000002413	ENSCAFT00000003820	Transcript	stop_gained	4003	4003	1335	Q/*	Cag/Tag	-	-	-1	DST	HGNC	HGNC:1090	protein_coding	YES	-
12:23853109-23853110	-	ENSCAFG00000002413	ENSCAFT00000003820	Transcript	frameshift_variant,feature_truncation	3655	3655	1219	-	-	-	-	-1	DST	HGNC	HGNC:1090	protein_coding	YES	-
12:2410356	A	ENSCAFG00000000823	ENSCAFT00000001291	Transcript	missense_variant	1322	1322	441	A/V	gCt/gTt	-	-	-1	TAP2	Uniprot_gn	-	protein_coding	YES	deleterious(0)
12:24244121	C	ENSCAFG00000002447	ENSCAFT00000003860	Transcript	missense_variant	568	568	190	D/H	Gac/Cac	-	-	1	BEND6	HGNC	HGNC:20871	protein_coding	YES	deleterious(0.01)
12:2426686	C	ENSCAFG00000000832	ENSCAFT00000001306	Transcript	stop_gained	1830	1830	610	Y/*	taC/taG	-	-	-1	TAP1	HGNC	HGNC:43	protein_coding	YES	-
12:2673196	A	ENSCAFG00000000933	ENSCAFT00000001442	Transcript	missense_variant	637	437	146	R/H	cGc/cAc	-	-	1	RING1	Uniprot_gn	-	protein_coding	YES	deleterious(0)
12:2737350	G	ENSCAFG00000000963	ENSCAFT00000001495	Transcript	missense_variant	229	188	63	E/A	gAg/gCg	-	-	-1	RGL2	HGNC	HGNC:9769	protein_coding	YES	deleterious(0.04)
12:2739059-2739072	-	ENSCAFG00000031301	ENSCAFT00000047587	Transcript	frameshift_variant,feature_truncation	511-523	511-523	171-175	-	-	-	-	1	-	-	-	protein_coding	YES	-
12:2750901	A	ENSCAFG00000000972	ENSCAFT00000001502	Transcript	missense_variant	697	388	130	S/C	Agc/Tgc	-	-	-1	TAPBP	Uniprot_gn	-	protein_coding	YES	deleterious(0.01)
12:2752972	T	ENSCAFG00000000977	ENSCAFT00000001511	Transcript	missense_variant	1484	1484	495	G/E	gGg/gAg	-	-	-1	ZBTB22	HGNC	HGNC:13085	protein_coding	YES	deleterious(0)
12:2753385	C	ENSCAFG00000000977	ENSCAFT00000001511	Transcript	missense_variant	1071	1071	357	S/R	agC/agG	-	-	-1	ZBTB22	HGNC	HGNC:13085	protein_coding	YES	deleterious(0)
12:3028911	T	ENSCAFG00000001130	ENSCAFT00000001745	Transcript	missense_variant	3462	3206	1069	S/L	tCg/tTg	-	-	1	ITPR3	HGNC	HGNC:6182	protein_coding	YES	deleterious(0.03)
12:32692929	A	ENSCAFG00000002562	ENSCAFT00000004046	Transcript	missense_variant,splice_region_variant	1975	1513	505	G/S	Ggc/Agc	-	-	1	COL19A1	HGNC	HGNC:2196	protein_coding	YES	deleterious(0.01)
12:33186986	A	ENSCAFG00000002612	ENSCAFT00000004108	Transcript	missense_variant	191	191	64	G/E	gGg/gAg	-	-	1	SMAP1	Uniprot_gn	-	protein_coding	YES	deleterious(0)
12:331996	A	ENSCAFG00000000394	ENSCAFT00000000624	Transcript	missense_variant	173	173	58	G/E	gGa/gAa	-	-	1	RPP21	HGNC	HGNC:21300	protein_coding	YES	deleterious(0)
12:33316904-33316908	-	ENSCAFG00000002612	ENSCAFT00000004108	Transcript	frameshift_variant,feature_truncation	744-747	744-747	248-249	-	-	-	-	1	SMAP1	Uniprot_gn	-	protein_coding	YES	-
12:33317884	A	ENSCAFG00000002612	ENSCAFT00000004108	Transcript	missense_variant	899	899	300	G/E	gGa/gAa	-	-	1	SMAP1	Uniprot_gn	-	protein_coding	YES	deleterious(0.04)
12:33347562	T	ENSCAFG00000002616	ENSCAFT00000004114	Transcript	missense_variant	1220	634	212	V/I	Gtc/Atc	-	-	-1	B3GAT2	Uniprot_gn	-	protein_coding	YES	deleterious(0.02)
12:33400507	A	ENSCAFG00000002616	ENSCAFT00000004114	Transcript	missense_variant	596	10	4	A/S	Gcg/Tcg	-	-	-1	B3GAT2	Uniprot_gn	-	protein_coding	YES	deleterious(0.01)
12:33685786	A	ENSCAFG00000032206	ENSCAFT00000043836	Transcript	frameshift_variant,feature_elongation	330-331	330-331	110-111	-	-	-	-	1	OGFRL1	HGNC	HGNC:21378	protein_coding	YES	-
12:33690279	T	ENSCAFG00000032206	ENSCAFT00000043836	Transcript	missense_variant	815	815	272	S/F	tCc/tTc	-	-	1	OGFRL1	HGNC	HGNC:21378	protein_coding	YES	deleterious(0.05)
12:34446795	A	ENSCAFG00000002640	ENSCAFT00000004163	Transcript	stop_gained	288	288	96	W/*	tgG/tgA	-	-	1	RIMS1	HGNC	HGNC:17282	protein_coding	YES	-
12:34498485	A	ENSCAFG00000002640	ENSCAFT00000004163	Transcript	missense_variant	1625	1625	542	G/E	gGa/gAa	-	-	1	RIMS1	HGNC	HGNC:17282	protein_coding	YES	deleterious(0)
12:35304632	A	ENSCAFG00000002645	ENSCAFT00000004170	Transcript	missense_variant	998	998	333	R/H	cGc/cAc	-	-	1	KCNQ5	HGNC	HGNC:6299	protein_coding	YES	deleterious(0)
12:3535039	T	ENSCAFG00000001211	ENSCAFT00000001872	Transcript	stop_gained	219	157	53	R/*	Aga/Tga	-	-	1	HMGA1	Uniprot_gn	-	protein_coding	YES	-
12:35714186	C	ENSCAFG00000002663	ENSCAFT00000004200	Transcript	frameshift_variant,feature_elongation	155-156	155-156	52	-	-	-	-	1	CD109	HGNC	HGNC:21685	protein_coding	YES	-
12:35823641	T	ENSCAFG00000002663	ENSCAFT00000004200	Transcript	missense_variant	3320	3320	1107	A/V	gCg/gTg	-	-	1	CD109	HGNC	HGNC:21685	protein_coding	YES	deleterious(0)
12:36766194	A	ENSCAFG00000002702	ENSCAFT00000004271	Transcript	missense_variant,splice_region_variant	6065	6065	2022	T/M	aCg/aTg	-	-	-1	COL12A1	HGNC	HGNC:2188	protein_coding	YES	deleterious(0)
12:36769407	T	ENSCAFG00000002702	ENSCAFT00000004271	Transcript	stop_gained	5591	5591	1864	W/*	tGg/tAg	-	-	-1	COL12A1	HGNC	HGNC:2188	protein_coding	YES	-
12:36960298	A	ENSCAFG00000002709	ENSCAFT00000004283	Transcript	stop_gained	3233	2515	839	R/*	Cga/Tga	-	-	-1	FILIP1	HGNC	HGNC:21015	protein_coding	YES	-
12:36961770	A	ENSCAFG00000002709	ENSCAFT00000004283	Transcript	missense_variant	1761	1043	348	T/I	aCc/aTc	-	-	-1	FILIP1	HGNC	HGNC:21015	protein_coding	YES	deleterious(0.04)
12:37296946	C	ENSCAFG00000002711	ENSCAFT00000004287	Transcript	splice_acceptor_variant	-	-	-	-	-	-	-	1	SENP6	HGNC	HGNC:20944	protein_coding	YES	-
12:37307278	G	ENSCAFG00000002711	ENSCAFT00000004287	Transcript	missense_variant	2137	2137	713	L/V	Tta/Gta	-	-	1	SENP6	HGNC	HGNC:20944	protein_coding	YES	deleterious(0)
12:37422564	T	ENSCAFG00000002741	ENSCAFT00000004380	Transcript	missense_variant	248	223	75	H/Y	Cat/Tat	-	-	1	MYO6	HGNC	HGNC:7605	protein_coding	YES	deleterious(0)
12:37463939	T	ENSCAFG00000002741	ENSCAFT00000004380	Transcript	stop_gained	1877	1852	618	R/*	Cga/Tga	-	-	1	MYO6	HGNC	HGNC:7605	protein_coding	YES	-
12:3805824	T	ENSCAFG00000001221	ENSCAFT00000001902	Transcript	missense_variant	602	272	91	A/V	gCg/gTg	-	-	1	PACSIN1	HGNC	HGNC:8570	protein_coding	YES	deleterious(0)
12:39951386	C	ENSCAFG00000002804	ENSCAFT00000004493	Transcript	missense_variant	2246	2246	749	Y/C	tAc/tGc	-	-	-1	PHIP	HGNC	HGNC:15673	protein_coding	YES	deleterious(0)
12:39956334	T	ENSCAFG00000002804	ENSCAFT00000004493	Transcript	missense_variant	2066	2066	689	R/H	cGt/cAt	-	-	-1	PHIP	HGNC	HGNC:15673	protein_coding	YES	deleterious(0)
12:39975579	A	ENSCAFG00000002804	ENSCAFT00000004493	Transcript	missense_variant	1373	1373	458	H/L	cAt/cTt	-	-	-1	PHIP	HGNC	HGNC:15673	protein_coding	YES	deleterious(0.01)
12:4045894	T	ENSCAFG00000001234	ENSCAFT00000001919	Transcript	missense_variant	122	122	41	P/L	cCc/cTc	-	-	1	UHRF1BP1	HGNC	HGNC:21216	protein_coding	YES	deleterious(0)
12:40488982	T	ENSCAFG00000002822	ENSCAFT00000004511	Transcript	missense_variant	407	265	89	Q/K	Cag/Aag	-	-	-1	LCA5	HGNC	HGNC:31923	protein_coding	YES	deleterious(0.02)
12:40488994	T	ENSCAFG00000002822	ENSCAFT00000004511	Transcript	missense_variant	395	253	85	G/R	Gga/Aga	-	-	-1	LCA5	HGNC	HGNC:31923	protein_coding	YES	deleterious(0)
12:407110	A	ENSCAFG00000030478	ENSCAFT00000000632	Transcript	stop_gained	1356	1356	452	W/*	tgG/tgA	-	-	1	ABCF1	HGNC	HGNC:70	protein_coding	YES	-
12:4080562	C	ENSCAFG00000001234	ENSCAFT00000001919	Transcript	frameshift_variant,feature_elongation	3962-3963	3962-3963	1321	-	-	-	-	1	UHRF1BP1	HGNC	HGNC:21216	protein_coding	YES	-
12:408790	A	ENSCAFG00000030478	ENSCAFT00000000632	Transcript	missense_variant	1972	1972	658	V/M	Gtg/Atg	-	-	1	ABCF1	HGNC	HGNC:70	protein_coding	YES	deleterious(0)
12:41009926	A	ENSCAFG00000002848	ENSCAFT00000004556	Transcript	missense_variant	160	89	30	G/E	gGg/gAg	-	-	1	BCKDHB	HGNC	HGNC:987	protein_coding	YES	deleterious(0.02)
12:41162407	T	ENSCAFG00000002848	ENSCAFT00000004556	Transcript	missense_variant	1021	950	317	T/I	aCa/aTa	-	-	1	BCKDHB	HGNC	HGNC:987	protein_coding	YES	deleterious(0)
12:41224501-41224503	-	ENSCAFG00000002848	ENSCAFT00000004556	Transcript	splice_acceptor_variant,feature_truncation	-	-	-	-	-	-	-	1	BCKDHB	HGNC	HGNC:987	protein_coding	YES	-
12:42274357	C	ENSCAFG00000031894	ENSCAFT00000044046	Transcript	missense_variant	1440	996	332	I/M	atC/atG	-	-	-1	FAM46A	HGNC	HGNC:18345	protein_coding	YES	deleterious(0)
12:42274446	A	ENSCAFG00000031894	ENSCAFT00000044046	Transcript	stop_gained	1351	907	303	K/*	Aaa/Taa	-	-	-1	FAM46A	HGNC	HGNC:18345	protein_coding	YES	-
12:42274482	G	ENSCAFG00000031894	ENSCAFT00000044046	Transcript	frameshift_variant,feature_elongation	1314-1315	870-871	290-291	-	-	-	-	-1	FAM46A	HGNC	HGNC:18345	protein_coding	YES	-
12:4250076	T	ENSCAFG00000001277	ENSCAFT00000001982	Transcript	missense_variant	2182	2182	728	R/C	Cgc/Tgc	-	-	1	ANKS1A	HGNC	HGNC:20961	protein_coding	YES	deleterious(0)
12:42754638	C	ENSCAFG00000002862	ENSCAFT00000004596	Transcript	missense_variant	858	482	161	N/S	aAt/aGt	-	-	-1	IBTK	HGNC	HGNC:17853	protein_coding	YES	deleterious(0.03)
12:43449921	G	ENSCAFG00000002879	ENSCAFT00000004603	Transcript	missense_variant	1345	427	143	C/R	Tgt/Cgt	-	-	-1	UBE3D	HGNC	HGNC:21381	protein_coding	YES	deleterious(0)
12:43540792	A	ENSCAFG00000002898	ENSCAFT00000004651	Transcript	missense_variant	1432	1432	478	V/M	Gtg/Atg	-	-	1	DOPEY1	HGNC	HGNC:21194	protein_coding	YES	deleterious(0.01)
12:43556898	C	ENSCAFG00000002898	ENSCAFT00000004651	Transcript	missense_variant	4952	4952	1651	H/P	cAt/cCt	-	-	1	DOPEY1	HGNC	HGNC:21194	protein_coding	YES	deleterious(0.01)
12:43612786	C	ENSCAFG00000030550	ENSCAFT00000045748	Transcript	missense_variant	204	64	22	M/L	Atg/Ctg	-	-	1	RWDD2A	HGNC	HGNC:21385	protein_coding	YES	deleterious(0)
12:4414786	A	ENSCAFG00000001298	ENSCAFT00000002005	Transcript	missense_variant	2698	2698	900	V/I	Gtt/Att	-	-	1	SCUBE3	HGNC	HGNC:13655	protein_coding	YES	deleterious(0)
12:44412624	C	ENSCAFG00000002979	ENSCAFT00000004775	Transcript	missense_variant	3782	3455	1152	P/R	cCt/cGt	-	-	-1	CEP162	HGNC	HGNC:21107	protein_coding	YES	deleterious(0.03)
12:4457570	A	ENSCAFG00000001304	ENSCAFT00000002020	Transcript	missense_variant	887	791	264	R/H	cGc/cAc	-	-	1	ZNF76	HGNC	HGNC:13149	protein_coding	YES	deleterious(0)
12:44927600	T	ENSCAFG00000002987	ENSCAFT00000004787	Transcript	missense_variant	439	439	147	D/N	Gat/Aat	-	-	-1	TBX18	HGNC	HGNC:11595	protein_coding	YES	deleterious(0)
12:44929176	T	ENSCAFG00000002987	ENSCAFT00000004787	Transcript	stop_gained	30	30	10	C/*	tgC/tgA	-	-	-1	TBX18	HGNC	HGNC:11595	protein_coding	YES	-
12:45492045	G	ENSCAFG00000002994	ENSCAFT00000004810	Transcript	missense_variant	555	37	13	F/V	Ttt/Gtt	-	-	1	NT5E	HGNC	HGNC:8021	protein_coding	YES	deleterious(0)
12:462431	C	ENSCAFG00000000427	ENSCAFT00000000685	Transcript	missense_variant	2537	2537	846	A/G	gCc/gGc	-	-	-1	DHX16	HGNC	HGNC:2739	protein_coding	YES	deleterious(0.02)
12:4644232	T	ENSCAFG00000001335	ENSCAFT00000002076	Transcript	missense_variant	475	475	159	G/R	Ggg/Agg	-	-	-1	TULP1	HGNC	HGNC:12423	protein_coding	YES	deleterious(0.01)
12:46774219	C	ENSCAFG00000003045	ENSCAFT00000004898	Transcript	missense_variant	1652	1652	551	F/S	tTc/tCc	-	-	1	ZNF292	HGNC	HGNC:18410	protein_coding	YES	deleterious(0)
12:46776985	T	ENSCAFG00000003045	ENSCAFT00000004898	Transcript	missense_variant	4418	4418	1473	P/L	cCt/cTt	-	-	1	ZNF292	HGNC	HGNC:18410	protein_coding	YES	deleterious(0.01)
12:46778712-46778713	-	ENSCAFG00000003045	ENSCAFT00000004898	Transcript	frameshift_variant,feature_truncation	6146	6146	2049	-	-	-	-	1	ZNF292	HGNC	HGNC:18410	protein_coding	YES	-
12:46780015	T	ENSCAFG00000003045	ENSCAFT00000004898	Transcript	missense_variant	7448	7448	2483	D/V	gAt/gTt	-	-	1	ZNF292	HGNC	HGNC:18410	protein_coding	YES	deleterious(0.01)
12:46860072	GGGAAAAT	ENSCAFG00000003058	ENSCAFT00000004912	Transcript	frameshift_variant,feature_elongation	450-451	450-451	150-151	-	-	-	-	1	C6orf163	HGNC	HGNC:21403	protein_coding	YES	-
12:46860073	A	ENSCAFG00000003058	ENSCAFT00000004912	Transcript	missense_variant	451	451	151	Q/K	Cag/Aag	-	-	1	C6orf163	HGNC	HGNC:21403	protein_coding	YES	deleterious(0.02)
12:46860075	GGA	ENSCAFG00000003058	ENSCAFT00000004912	Transcript	inframe_insertion	453-454	453-454	151-152	-/G	-/GGA	-	-	1	C6orf163	HGNC	HGNC:21403	protein_coding	YES	-
12:46860078	GAGAAGAA	ENSCAFG00000003058	ENSCAFT00000004912	Transcript	frameshift_variant,feature_elongation	456-457	456-457	152-153	-	-	-	-	1	C6orf163	HGNC	HGNC:21403	protein_coding	YES	-
12:46860080	GTGTGGGAAA	ENSCAFG00000003058	ENSCAFT00000004912	Transcript	frameshift_variant,feature_elongation	458-459	458-459	153	-	-	-	-	1	C6orf163	HGNC	HGNC:21403	protein_coding	YES	-
12:46957553	T	ENSCAFG00000003061	ENSCAFT00000004921	Transcript	missense_variant	1597	1592	531	S/L	tCg/tTg	-	-	1	-	-	-	protein_coding	YES	deleterious(0)
12:46989598	G	ENSCAFG00000003065	ENSCAFT00000004925	Transcript	missense_variant	1297	760	254	S/G	Agt/Ggt	-	-	1	SLC35A1	Uniprot_gn	-	protein_coding	YES	deleterious(0.01)
12:47104450-47104453	-	ENSCAFG00000003080	ENSCAFT00000004945	Transcript	inframe_deletion	2626-2628	1821-1823	607-608	PY/P	ccTTAt/cct	-	-	1	ORC3	HGNC	HGNC:8489	protein_coding	YES	-
12:4742616	T	ENSCAFG00000001343	ENSCAFT00000002086	Transcript	missense_variant	802	677	226	G/E	gGa/gAa	-	-	-1	FKBP5	HGNC	HGNC:3721	protein_coding	YES	deleterious(0)
12:47541740	A	ENSCAFG00000003085	ENSCAFT00000004948	Transcript	missense_variant	991	991	331	R/W	Cgg/Tgg	-	-	-1	CNR1	Uniprot_gn	-	protein_coding	YES	deleterious(0.02)
12:48239451	G	ENSCAFG00000003089	ENSCAFT00000004955	Transcript	splice_donor_variant	-	-	-	-	-	-	-	-1	RNGTT	HGNC	HGNC:10073	protein_coding	YES	-
12:48409996	C	ENSCAFG00000003096	ENSCAFT00000004967	Transcript	missense_variant	917	662	221	G/A	gGa/gCa	-	-	1	PM20D2	HGNC	HGNC:21408	protein_coding	YES	deleterious(0)
12:48545725	A	ENSCAFG00000003101	ENSCAFT00000004977	Transcript	missense_variant	692	692	231	P/L	cCc/cTc	-	-	-1	UBE2J1	HGNC	HGNC:17598	protein_coding	YES	deleterious(0.04)
12:4899509	T	ENSCAFG00000001348	ENSCAFT00000002089	Transcript	missense_variant	268	268	90	D/Y	Gac/Tac	-	-	1	CLPSL2	HGNC	HGNC:21250	protein_coding	YES	deleterious(0)
12:49066704-49066706	-	ENSCAFG00000003113	ENSCAFT00000005001	Transcript	frameshift_variant,feature_truncation	2544-2545	2167-2168	723	-	-	-	-	1	CASP8AP2	HGNC	HGNC:1510	protein_coding	YES	-
12:49112671	A	ENSCAFG00000003116	ENSCAFT00000049706	Transcript	stop_gained	1951	1951	651	R/*	Cga/Tga	-	-	-1	BACH2	HGNC	HGNC:14078	protein_coding	YES	-
12:4920188	T	ENSCAFG00000001351	ENSCAFT00000002091	Transcript	missense_variant	98	98	33	T/I	aCc/aTc	-	-	1	LHFPL5	HGNC	HGNC:21253	protein_coding	YES	deleterious(0)
12:49724568	T	ENSCAFG00000003123	ENSCAFT00000005029	Transcript	missense_variant	143	143	48	G/E	gGa/gAa	-	-	-1	MAP3K7	HGNC	HGNC:6859	protein_coding	YES	deleterious(0)
12:5245911	A	ENSCAFG00000001382	ENSCAFT00000002131	Transcript	missense_variant	698	568	190	A/T	Gcc/Acc	-	-	1	MAPK13	HGNC	HGNC:6875	protein_coding	YES	deleterious(0)
12:5324474	T	ENSCAFG00000001386	ENSCAFT00000047147	Transcript	missense_variant	1752	1752	584	K/N	aaG/aaT	-	-	1	BRPF3	HGNC	HGNC:14256	protein_coding	YES	deleterious(0)
12:5343990	T	ENSCAFG00000001386	ENSCAFT00000047147	Transcript	missense_variant	3494	3494	1165	T/I	aCc/aTc	-	-	1	BRPF3	HGNC	HGNC:14256	protein_coding	YES	deleterious(0)
12:5400445	T	ENSCAFG00000001392	ENSCAFT00000002155	Transcript	missense_variant	278	278	93	S/L	tCg/tTg	-	-	1	PNPLA1	HGNC	HGNC:21246	protein_coding	YES	deleterious(0)
12:5429952	T	ENSCAFG00000001393	ENSCAFT00000002157	Transcript	missense_variant	1805	1805	602	G/E	gGa/gAa	-	-	-1	C6orf222	HGNC	HGNC:33769	protein_coding	YES	deleterious(0.04)
12:55210418	T	ENSCAFG00000003446	ENSCAFT00000005535	Transcript	missense_variant	408	408	136	M/I	atG/atA	-	-	-1	GPR63	HGNC	HGNC:13302	protein_coding	YES	deleterious(0.01)
12:5751952	T	ENSCAFG00000029853	ENSCAFT00000044360	Transcript	missense_variant	332	221	74	S/F	tCc/tTc	-	-	1	CDKN1A	Uniprot_gn	-	protein_coding	YES	deleterious(0)
12:57803074	A	ENSCAFG00000023314	ENSCAFT00000035796	Transcript	missense_variant	7	7	3	G/R	Gga/Aga	-	-	1	PRDM13	HGNC	HGNC:13998	protein_coding	YES	deleterious(0)
12:5794675	T	ENSCAFG00000001418	ENSCAFT00000002191	Transcript	stop_gained	1320	1189	397	Q/*	Cag/Tag	-	-	1	RAB44	HGNC	HGNC:21068	protein_coding	YES	-
12:58488690	C	ENSCAFG00000003538	ENSCAFT00000005680	Transcript	missense_variant	2459	1502	501	S/C	tCt/tGt	-	-	-1	SIM1	HGNC	HGNC:10882	protein_coding	YES	deleterious(0.02)
12:6077659	A	ENSCAFG00000001444	ENSCAFT00000002252	Transcript	missense_variant	695	695	232	S/N	aGc/aAc	-	-	1	FGD2	HGNC	HGNC:3664	protein_coding	YES	deleterious(0.04)
12:6087178	T	ENSCAFG00000001444	ENSCAFT00000002252	Transcript	stop_gained	1366	1366	456	Q/*	Cag/Tag	-	-	1	FGD2	HGNC	HGNC:3664	protein_coding	YES	-
12:6214265	T	ENSCAFG00000001448	ENSCAFT00000002258	Transcript	missense_variant	1328	1328	443	Q/L	cAg/cTg	-	-	1	PIM1	EntrezGene	-	protein_coding	YES	deleterious(0)
12:62761605	A	ENSCAFG00000003653	ENSCAFT00000005896	Transcript	missense_variant,splice_region_variant	1211	1211	404	P/L	cCa/cTa	-	-	-1	PREP	HGNC	HGNC:9358	protein_coding	YES	deleterious(0.01)
12:63484152	T	ENSCAFG00000003694	ENSCAFT00000005944	Transcript	missense_variant	481	481	161	P/S	Ccg/Tcg	-	-	1	PRDM1	HGNC	HGNC:9346	protein_coding	YES	deleterious(0)
12:63919680	T	ENSCAFG00000003710	ENSCAFT00000005972	Transcript	missense_variant	4065	4065	1355	M/I	atG/atT	-	-	1	AIM1	HGNC	HGNC:356	protein_coding	YES	deleterious(0.01)
12:64307462	A	ENSCAFG00000029143	ENSCAFT00000048384	Transcript	missense_variant	1314	1174	392	D/Y	Gac/Tac	-	-	-1	BEND3	HGNC	HGNC:23040	protein_coding	YES	deleterious(0.01)
12:66199900	G	ENSCAFG00000003802	ENSCAFT00000006111	Transcript	missense_variant	567	218	73	H/R	cAc/cGc	-	-	1	-	-	-	protein_coding	YES	deleterious(0.03)
12:663302	A	ENSCAFG00000000448	ENSCAFT00000000714	Transcript	missense_variant	1049	1049	350	G/D	gGc/gAc	-	-	1	DDR1	HGNC	HGNC:2730	protein_coding	YES	deleterious(0)
12:663355	T	ENSCAFG00000000448	ENSCAFT00000000714	Transcript	stop_gained	1102	1102	368	E/*	Gaa/Taa	-	-	1	DDR1	HGNC	HGNC:2730	protein_coding	YES	-
12:66354844	T	ENSCAFG00000003824	ENSCAFT00000006147	Transcript	missense_variant	1390	1390	464	V/M	Gtg/Atg	-	-	-1	MICAL1	HGNC	HGNC:20619	protein_coding	YES	deleterious(0.03)
12:66369474	T	ENSCAFG00000003828	ENSCAFT00000006157	Transcript	missense_variant	2173	1694	565	V/E	gTg/gAg	-	-	-1	ZBTB24	HGNC	HGNC:21143	protein_coding	YES	deleterious(0.01)
12:66722206	A	ENSCAFG00000003846	ENSCAFT00000006188	Transcript	missense_variant	671	671	224	R/H	cGc/cAc	-	-	1	GPR6	HGNC	HGNC:4515	protein_coding	YES	deleterious(0)
12:66959106	A	ENSCAFG00000003873	ENSCAFT00000006231	Transcript	missense_variant	1257	396	132	K/N	aaA/aaT	-	-	-1	METTL24	HGNC	HGNC:21566	protein_coding	YES	deleterious(0)
12:67236190	T	ENSCAFG00000003902	ENSCAFT00000036428	Transcript	missense_variant	1165	1051	351	G/R	Ggg/Agg	-	-	-1	CDK19	HGNC	HGNC:19338	protein_coding	YES	deleterious(0.03)
12:68058256	A	ENSCAFG00000003960	ENSCAFT00000006360	Transcript	missense_variant	263	263	88	Q/L	cAg/cTg	-	-	-1	TRAF3IP2	HGNC	HGNC:1343	protein_coding	YES	deleterious(0.03)
12:68526901	A	ENSCAFG00000029965	ENSCAFT00000047266	Transcript	missense_variant	616	221	74	S/N	aGc/aAc	-	-	1	FAM229B	HGNC	HGNC:33858	protein_coding	YES	deleterious(0)
12:70069483	T	ENSCAFG00000004049	ENSCAFT00000006490	Transcript	missense_variant	317	317	106	G/E	gGa/gAa	-	-	-1	HDAC2	Uniprot_gn	-	protein_coding	YES	deleterious(0)
12:712640	A	ENSCAFG00000000470	ENSCAFT00000000746	Transcript	frameshift_variant,feature_elongation	349-350	349-350	117	-	-	-	-	1	DPCR1	HGNC	HGNC:21666	protein_coding	YES	-
12:72306801	T	ENSCAFG00000004109	ENSCAFT00000006583	Transcript	missense_variant	663	663	221	K/N	aaG/aaT	-	-	1	FAM120B	HGNC	HGNC:21109	protein_coding	YES	deleterious(0)
12:72349527	A	ENSCAFG00000004109	ENSCAFT00000006583	Transcript	missense_variant	2452	2452	818	G/R	Ggg/Agg	-	-	1	FAM120B	HGNC	HGNC:21109	protein_coding	YES	deleterious(0)
12:7731604	A	ENSCAFG00000001518	ENSCAFT00000002400	Transcript	stop_gained	3729	3729	1243	W/*	tgG/tgA	-	-	1	DNAH8	HGNC	HGNC:2952	protein_coding	YES	-
12:8118439	A	ENSCAFG00000029359	ENSCAFT00000046762	Transcript	missense_variant	811	452	151	S/F	tCc/tTc	-	-	-1	KCNK5	HGNC	HGNC:6280	protein_coding	YES	deleterious(0)
12:8488420	A	ENSCAFG00000001560	ENSCAFT00000002437	Transcript	missense_variant	809	809	270	A/V	gCc/gTc	-	-	-1	KIF6	HGNC	HGNC:21202	protein_coding	YES	deleterious(0.02)
12:8488543	C	ENSCAFG00000001560	ENSCAFT00000002437	Transcript	missense_variant	686	686	229	I/S	aTt/aGt	-	-	-1	KIF6	HGNC	HGNC:21202	protein_coding	YES	deleterious(0)
12:8764165	T	ENSCAFG00000001565	ENSCAFT00000002454	Transcript	missense_variant	1026	889	297	R/C	Cgc/Tgc	-	-	1	DAAM2	HGNC	HGNC:18143	protein_coding	YES	deleterious(0.02)
12:9246378-9246379	-	ENSCAFG00000001571	ENSCAFT00000044697	Transcript	frameshift_variant,feature_truncation	1176	1176	392	-	-	-	-	-1	LRFN2	HGNC	HGNC:21226	protein_coding	YES	-
12:9246780	T	ENSCAFG00000001571	ENSCAFT00000044697	Transcript	missense_variant	775	775	259	D/N	Gac/Aac	-	-	-1	LRFN2	HGNC	HGNC:21226	protein_coding	YES	deleterious(0.01)
12:9247398	A	ENSCAFG00000001571	ENSCAFT00000044697	Transcript	missense_variant	157	157	53	R/W	Cgg/Tgg	-	-	-1	LRFN2	HGNC	HGNC:21226	protein_coding	YES	deleterious(0)
12:9798386	A	ENSCAFG00000001574	ENSCAFT00000002469	Transcript	missense_variant	242	242	81	G/D	gGc/gAc	-	-	1	TSPO2	HGNC	HGNC:21256	protein_coding	YES	deleterious(0.01)
12:9875137	G	ENSCAFG00000001582	ENSCAFT00000037535	Transcript	missense_variant	596	596	199	V/G	gTg/gGg	-	-	1	-	-	-	protein_coding	YES	deleterious(0)
12:9877200	T	ENSCAFG00000001582	ENSCAFT00000037535	Transcript	missense_variant	1015	1015	339	P/S	Cct/Tct	-	-	1	-	-	-	protein_coding	YES	deleterious(0)
12:9926394	T	ENSCAFG00000001586	ENSCAFT00000002485	Transcript	missense_variant	351	194	65	S/N	aGc/aAc	-	-	-1	TREM2	HGNC	HGNC:17761	protein_coding	YES	deleterious(0)
13:10017000	A	ENSCAFG00000024786	ENSCAFT00000045918	Transcript	missense_variant	8678	8678	2893	G/E	gGa/gAa	-	-	1	PKHD1L1	HGNC	HGNC:20313	protein_coding	YES	deleterious(0)
13:10019768	A	ENSCAFG00000024786	ENSCAFT00000045918	Transcript	missense_variant	9098	9098	3033	R/Q	cGa/cAa	-	-	1	PKHD1L1	HGNC	HGNC:20313	protein_coding	YES	deleterious(0.01)
13:10037894	A	ENSCAFG00000024786	ENSCAFT00000045918	Transcript	frameshift_variant,feature_elongation	10218-10219	10218-10219	3406-3407	-	-	-	-	1	PKHD1L1	HGNC	HGNC:20313	protein_coding	YES	-
13:10043118	A	ENSCAFG00000024786	ENSCAFT00000045918	Transcript	missense_variant	10487	10487	3496	G/E	gGa/gAa	-	-	1	PKHD1L1	HGNC	HGNC:20313	protein_coding	YES	deleterious(0)
13:10051299	A	ENSCAFG00000024786	ENSCAFT00000045918	Transcript	missense_variant	11366	11366	3789	R/Q	cGa/cAa	-	-	1	PKHD1L1	HGNC	HGNC:20313	protein_coding	YES	deleterious(0)
13:10111277	C	ENSCAFG00000000741	ENSCAFT00000001146	Transcript	stop_gained	1833	1833	611	Y/*	taC/taG	-	-	-1	SYBU	HGNC	HGNC:26011	protein_coding	YES	-
13:10111963	T	ENSCAFG00000000741	ENSCAFT00000001146	Transcript	missense_variant	1147	1147	383	D/N	Gac/Aac	-	-	-1	SYBU	HGNC	HGNC:26011	protein_coding	YES	deleterious(0.01)
13:10112038	T	ENSCAFG00000000741	ENSCAFT00000001146	Transcript	missense_variant	1072	1072	358	D/N	Gac/Aac	-	-	-1	SYBU	HGNC	HGNC:26011	protein_coding	YES	deleterious(0.01)
13:10114922	T	ENSCAFG00000000741	ENSCAFT00000001146	Transcript	missense_variant	863	863	288	R/H	cGc/cAc	-	-	-1	SYBU	HGNC	HGNC:26011	protein_coding	YES	deleterious(0)
13:10116400	A	ENSCAFG00000000741	ENSCAFT00000001146	Transcript	missense_variant	692	692	231	S/F	tCc/tTc	-	-	-1	SYBU	HGNC	HGNC:26011	protein_coding	YES	deleterious(0)
13:10178227	T	ENSCAFG00000000741	ENSCAFT00000001146	Transcript	missense_variant	194	194	65	T/N	aCc/aAc	-	-	-1	SYBU	HGNC	HGNC:26011	protein_coding	YES	deleterious(0)
13:12468824	T	ENSCAFG00000000786	ENSCAFT00000001238	Transcript	missense_variant	8362	8362	2788	G/R	Gga/Aga	-	-	-1	CSMD3	HGNC	HGNC:19291	protein_coding	YES	deleterious(0.01)
13:12512544	T	ENSCAFG00000000786	ENSCAFT00000001238	Transcript	stop_gained	6417	6417	2139	W/*	tgG/tgA	-	-	-1	CSMD3	HGNC	HGNC:19291	protein_coding	YES	-
13:12647384	G	ENSCAFG00000000786	ENSCAFT00000001238	Transcript	missense_variant	5204	5204	1735	G/A	gGt/gCt	-	-	-1	CSMD3	HGNC	HGNC:19291	protein_coding	YES	deleterious(0.01)
13:12767591	T	ENSCAFG00000000786	ENSCAFT00000001238	Transcript	missense_variant	3604	3604	1202	D/N	Gac/Aac	-	-	-1	CSMD3	HGNC	HGNC:19291	protein_coding	YES	deleterious(0.01)
13:13581095	A	ENSCAFG00000000798	ENSCAFT00000001241	Transcript	missense_variant	248	248	83	P/L	cCg/cTg	-	-	-1	MGST3	EntrezGene	-	protein_coding	YES	deleterious(0.04)
13:15026917	A	ENSCAFG00000000810	ENSCAFT00000001274	Transcript	missense_variant	2916	2795	932	A/V	gCg/gTg	-	-	-1	TRPS1	HGNC	HGNC:12340	protein_coding	YES	deleterious(0)
13:15192549	T	ENSCAFG00000000810	ENSCAFT00000001274	Transcript	missense_variant	2647	2526	842	D/E	gaT/gaA	-	-	-1	TRPS1	HGNC	HGNC:12340	protein_coding	YES	deleterious(0.01)
13:15224420	A	ENSCAFG00000000810	ENSCAFT00000001274	Transcript	missense_variant	639	518	173	A/V	gCt/gTt	-	-	-1	TRPS1	HGNC	HGNC:12340	protein_coding	YES	deleterious(0)
13:15224862	T	ENSCAFG00000000810	ENSCAFT00000001274	Transcript	missense_variant	197	76	26	A/T	Gct/Act	-	-	-1	TRPS1	HGNC	HGNC:12340	protein_coding	YES	deleterious(0)
13:16359708-16359735	-	ENSCAFG00000000822	ENSCAFT00000001286	Transcript	inframe_deletion	538-564	97-123	33-41	FECNLESSV/-	TTTGAGTGTAATTTAGAGAGCAGTGTG/-	-	-	-1	RAD21	HGNC	HGNC:9811	protein_coding	YES	-
13:18158847	A	ENSCAFG00000000834	ENSCAFT00000001305	Transcript	stop_gained	948	727	243	R/*	Cga/Tga	-	-	-1	TNFRSF11B	HGNC	HGNC:11909	protein_coding	YES	-
13:1818066	C	ENSCAFG00000000507	ENSCAFT00000000811	Transcript	missense_variant	10999	10999	3667	G/R	Ggg/Cgg	-	-	1	VPS13B	Uniprot_gn	-	protein_coding	YES	deleterious(0)
13:18509610	T	ENSCAFG00000030440	ENSCAFT00000047387	Transcript	missense_variant	977	454	152	P/S	Cca/Tca	-	-	1	NOV	HGNC	HGNC:7885	protein_coding	YES	deleterious(0.01)
13:18509637	A	ENSCAFG00000030440	ENSCAFT00000047387	Transcript	missense_variant	1004	481	161	G/R	Ggg/Agg	-	-	1	NOV	HGNC	HGNC:7885	protein_coding	YES	deleterious(0)
13:18786115	T	ENSCAFG00000000875	ENSCAFT00000001363	Transcript	missense_variant	2128	2128	710	V/M	Gtg/Atg	-	-	-1	TAF2	HGNC	HGNC:11536	protein_coding	YES	deleterious(0.02)
13:18798094	T	ENSCAFG00000000875	ENSCAFT00000001363	Transcript	stop_gained	1143	1143	381	W/*	tgG/tgA	-	-	-1	TAF2	HGNC	HGNC:11536	protein_coding	YES	-
13:18902922	T	ENSCAFG00000000885	ENSCAFT00000001377	Transcript	missense_variant	142	142	48	L/F	Ctc/Ttc	-	-	1	DEPTOR	HGNC	HGNC:22953	protein_coding	YES	deleterious(0.03)
13:18949740	T	ENSCAFG00000000885	ENSCAFT00000001377	Transcript	missense_variant,splice_region_variant	668	668	223	S/F	tCc/tTc	-	-	1	DEPTOR	HGNC	HGNC:22953	protein_coding	YES	deleterious(0)
13:20311768	C	ENSCAFG00000029394	ENSCAFT00000043079	Transcript	stop_gained	2328	1590	530	Y/*	taT/taG	-	-	-1	HAS2	HGNC	HGNC:4819	protein_coding	YES	-
13:20311968	T	ENSCAFG00000029394	ENSCAFT00000043079	Transcript	missense_variant	2128	1390	464	G/S	Ggc/Agc	-	-	-1	HAS2	HGNC	HGNC:4819	protein_coding	YES	deleterious(0)
13:20312261	A	ENSCAFG00000029394	ENSCAFT00000043079	Transcript	missense_variant	1835	1097	366	A/V	gCg/gTg	-	-	-1	HAS2	HGNC	HGNC:4819	protein_coding	YES	deleterious(0)
13:20327633	T	ENSCAFG00000029394	ENSCAFT00000043079	Transcript	missense_variant	944	206	69	R/Q	cGa/cAa	-	-	-1	HAS2	HGNC	HGNC:4819	protein_coding	YES	deleterious(0.04)
13:21377716	T	ENSCAFG00000000967	ENSCAFT00000001493	Transcript	missense_variant	401	401	134	P/L	cCc/cTc	-	-	1	ZHX2	HGNC	HGNC:18513	protein_coding	YES	deleterious(0)
13:21378193	T	ENSCAFG00000000967	ENSCAFT00000001493	Transcript	missense_variant	878	878	293	S/F	tCc/tTc	-	-	1	ZHX2	HGNC	HGNC:18513	protein_coding	YES	deleterious(0)
13:21452287	A	ENSCAFG00000000974	ENSCAFT00000001506	Transcript	missense_variant	35	35	12	P/L	cCg/cTg	-	-	-1	DERL1	HGNC	HGNC:28454	protein_coding	YES	deleterious(0)
13:21692080	A	ENSCAFG00000000992	ENSCAFT00000001534	Transcript	missense_variant	2163	1591	531	I/F	Att/Ttt	-	-	-1	ATAD2	HGNC	HGNC:30123	protein_coding	YES	deleterious(0)
13:21927377	G	ENSCAFG00000001011	ENSCAFT00000001553	Transcript	missense_variant	287	287	96	T/S	aCt/aGt	-	-	1	-	-	-	protein_coding	YES	deleterious(0.02)
13:21934997	T	ENSCAFG00000001012	ENSCAFT00000001555	Transcript	missense_variant	1872	1349	450	G/E	gGg/gAg	-	-	-1	KLHL38	HGNC	HGNC:34435	protein_coding	YES	deleterious(0)
13:21935642	T	ENSCAFG00000001012	ENSCAFT00000001555	Transcript	missense_variant	1227	704	235	R/K	aGg/aAg	-	-	-1	KLHL38	HGNC	HGNC:34435	protein_coding	YES	deleterious(0)
13:21968354	T	ENSCAFG00000001015	ENSCAFT00000001562	Transcript	missense_variant	904	826	276	A/T	Gcc/Acc	-	-	-1	ANXA13	Uniprot_gn	-	protein_coding	YES	deleterious(0.01)
13:22042961	T	ENSCAFG00000001027	ENSCAFT00000001587	Transcript	missense_variant	214	214	72	R/C	Cgt/Tgt	-	-	1	FAM91A1	HGNC	HGNC:26306	protein_coding	YES	deleterious(0)
13:22042987	A	ENSCAFG00000001027	ENSCAFT00000001587	Transcript	stop_gained	240	240	80	Y/*	taC/taA	-	-	1	FAM91A1	HGNC	HGNC:26306	protein_coding	YES	-
13:22055751	C	ENSCAFG00000001027	ENSCAFT00000001587	Transcript	missense_variant	1218	1218	406	M/I	atG/atC	-	-	1	FAM91A1	HGNC	HGNC:26306	protein_coding	YES	deleterious(0.01)
13:22215559	A	ENSCAFG00000001037	ENSCAFT00000001594	Transcript	missense_variant	2242	2242	748	E/K	Gag/Aag	-	-	1	FER1L6	HGNC	HGNC:28065	protein_coding	YES	deleterious(0.01)
13:22244894	T	ENSCAFG00000001037	ENSCAFT00000001594	Transcript	missense_variant	3669	3669	1223	K/N	aaG/aaT	-	-	1	FER1L6	HGNC	HGNC:28065	protein_coding	YES	deleterious(0.01)
13:22290954	A	ENSCAFG00000001037	ENSCAFT00000001594	Transcript	missense_variant	5542	5542	1848	G/R	Gga/Aga	-	-	1	FER1L6	HGNC	HGNC:28065	protein_coding	YES	deleterious(0)
13:22544917	A	ENSCAFG00000001040	ENSCAFT00000001597	Transcript	missense_variant	850	850	284	D/N	Gat/Aat	-	-	1	TRMT12	HGNC	HGNC:26091	protein_coding	YES	deleterious(0.05)
13:23032535-23032621	-	ENSCAFG00000001070	ENSCAFT00000001638	Transcript	splice_donor_variant,splice_acceptor_variant,intron_variant,feature_truncation	-	-	-	-	-	-	-	-1	KIAA0196	HGNC	HGNC:28984	protein_coding	YES	-
13:27152026	T	ENSCAFG00000001096	ENSCAFT00000001671	Transcript	missense_variant,splice_region_variant	2148	1883	628	G/E	gGg/gAg	-	-	-1	ASAP1	HGNC	HGNC:2720	protein_coding	YES	deleterious(0.04)
13:27162636-27162659	-	ENSCAFG00000001096	ENSCAFT00000001671	Transcript	splice_acceptor_variant,coding_sequence_variant,intron_variant,feature_truncation	?-1494	?-1229	?-410	-	-	-	-	-1	ASAP1	HGNC	HGNC:2720	protein_coding	YES	-
13:27937706	T	ENSCAFG00000001097	ENSCAFT00000001672	Transcript	missense_variant	29	29	10	G/D	gGc/gAc	-	-	-1	ADCY8	HGNC	HGNC:239	protein_coding	YES	deleterious(0.02)
13:28612924	A	ENSCAFG00000001100	ENSCAFT00000001676	Transcript	missense_variant	530	193	65	D/N	Gat/Aat	-	-	1	EFR3A	HGNC	HGNC:28970	protein_coding	YES	deleterious(0)
13:28614371	T	ENSCAFG00000001100	ENSCAFT00000001676	Transcript	missense_variant	600	263	88	C/F	tGc/tTc	-	-	1	EFR3A	HGNC	HGNC:28970	protein_coding	YES	deleterious(0)
13:28614464	A	ENSCAFG00000001100	ENSCAFT00000001676	Transcript	missense_variant	693	356	119	G/E	gGa/gAa	-	-	1	EFR3A	HGNC	HGNC:28970	protein_coding	YES	deleterious(0)
13:28620163-28620164	-	ENSCAFG00000001100	ENSCAFT00000001676	Transcript	frameshift_variant,feature_truncation	959	622	208	-	-	-	-	1	EFR3A	HGNC	HGNC:28970	protein_coding	YES	-
13:28684047	C	ENSCAFG00000001102	ENSCAFT00000001678	Transcript	missense_variant	1166	1166	389	A/G	gCc/gGc	-	-	-1	-	-	-	protein_coding	YES	deleterious(0)
13:28728160	C	ENSCAFG00000025196	ENSCAFT00000047693	Transcript	missense_variant	1187	1187	396	P/R	cCa/cGa	-	-	-1	HHLA1	HGNC	HGNC:4904	protein_coding	YES	deleterious(0.05)
13:28773970	C	ENSCAFG00000001105	ENSCAFT00000001691	Transcript	missense_variant	2676	2096	699	N/S	aAc/aGc	-	-	-1	KCNQ3	HGNC	HGNC:6297	protein_coding	YES	deleterious(0.01)
13:28784753	A	ENSCAFG00000001105	ENSCAFT00000001691	Transcript	missense_variant	1574	994	332	R/W	Cgg/Tgg	-	-	-1	KCNQ3	HGNC	HGNC:6297	protein_coding	YES	deleterious(0)
13:29289068	T	ENSCAFG00000001124	ENSCAFT00000001722	Transcript	missense_variant	552	552	184	K/N	aaG/aaT	-	-	1	PHF20L1	HGNC	HGNC:24280	protein_coding	YES	deleterious(0.01)
13:29327182	A	ENSCAFG00000001124	ENSCAFT00000001722	Transcript	missense_variant	2017	2017	673	D/N	Gat/Aat	-	-	1	PHF20L1	HGNC	HGNC:24280	protein_coding	YES	deleterious(0)
13:29355540	G	ENSCAFG00000001128	ENSCAFT00000001727	Transcript	missense_variant	440	440	147	E/G	gAg/gGg	-	-	1	TG	HGNC	HGNC:11764	protein_coding	YES	deleterious(0)
13:29355973	T	ENSCAFG00000001128	ENSCAFT00000001727	Transcript	missense_variant	508	508	170	R/C	Cgt/Tgt	-	-	1	TG	HGNC	HGNC:11764	protein_coding	YES	deleterious(0)
13:29370500	A	ENSCAFG00000001128	ENSCAFT00000001727	Transcript	splice_acceptor_variant	-	-	-	-	-	-	-	1	TG	HGNC	HGNC:11764	protein_coding	YES	-
13:29392067-29392068	-	ENSCAFG00000001128	ENSCAFT00000001727	Transcript	frameshift_variant,feature_truncation	4016	4016	1339	-	-	-	-	1	TG	HGNC	HGNC:11764	protein_coding	YES	-
13:30771740	C	ENSCAFG00000001159	ENSCAFT00000001794	Transcript	missense_variant	701	701	234	E/G	gAg/gGg	-	-	-1	ZFAT	HGNC	HGNC:19899	protein_coding	YES	deleterious(0.01)
13:31498001	G	ENSCAFG00000001166	ENSCAFT00000001808	Transcript	splice_acceptor_variant	-	-	-	-	-	-	-	1	KHDRBS3	HGNC	HGNC:18117	protein_coding	YES	-
13:3261972	T	ENSCAFG00000000587	ENSCAFT00000000905	Transcript	stop_gained	406	406	136	R/*	Cga/Tga	-	-	1	GRHL2	HGNC	HGNC:2799	protein_coding	YES	-
13:3319590	C	ENSCAFG00000000587	ENSCAFT00000000905	Transcript	splice_donor_variant	-	-	-	-	-	-	-	1	GRHL2	HGNC	HGNC:2799	protein_coding	YES	-
13:333774	T	ENSCAFG00000000463	ENSCAFT00000000738	Transcript	stop_gained	616	616	206	Q/*	Cag/Tag	-	-	1	ERICH5	HGNC	HGNC:26823	protein_coding	YES	-
13:33403465	T	ENSCAFG00000001173	ENSCAFT00000001815	Transcript	missense_variant	4127	4108	1370	A/T	Gcc/Acc	-	-	-1	FAM135B	HGNC	HGNC:28029	protein_coding	YES	deleterious(0)
13:33419077	A	ENSCAFG00000001173	ENSCAFT00000001815	Transcript	missense_variant	1503	1484	495	S/F	tCc/tTc	-	-	-1	FAM135B	HGNC	HGNC:28029	protein_coding	YES	deleterious(0.04)
13:33746595	T	ENSCAFG00000001178	ENSCAFT00000001823	Transcript	missense_variant	4232	4232	1411	G/D	gGc/gAc	-	-	-1	COL22A1	HGNC	HGNC:22989	protein_coding	YES	deleterious(0)
13:33748791	T	ENSCAFG00000001178	ENSCAFT00000001823	Transcript	missense_variant	4168	4168	1390	G/R	Gga/Aga	-	-	-1	COL22A1	HGNC	HGNC:22989	protein_coding	YES	deleterious(0)
13:33968938	A	ENSCAFG00000001178	ENSCAFT00000001823	Transcript	splice_donor_variant	-	-	-	-	-	-	-	-1	COL22A1	HGNC	HGNC:22989	protein_coding	YES	-
13:33969467	T	ENSCAFG00000001178	ENSCAFT00000001823	Transcript	missense_variant	127	127	43	D/N	Gac/Aac	-	-	-1	COL22A1	HGNC	HGNC:22989	protein_coding	YES	deleterious(0)
13:34474149	A	ENSCAFG00000001180	ENSCAFT00000001826	Transcript	missense_variant	356	209	70	S/F	tCc/tTc	-	-	-1	KCNK9	HGNC	HGNC:6283	protein_coding	YES	deleterious(0)
13:35001087	T	ENSCAFG00000001181	ENSCAFT00000001830	Transcript	splice_donor_variant	-	-	-	-	-	-	-	-1	TRAPPC9	HGNC	HGNC:30832	protein_coding	YES	-
13:35181658	T	ENSCAFG00000001196	ENSCAFT00000001857	Transcript	missense_variant	2882	2246	749	R/H	cGc/cAc	-	-	-1	AGO2	HGNC	HGNC:3263	protein_coding	YES	deleterious(0)
13:35679651	T	ENSCAFG00000001228	ENSCAFT00000001907	Transcript	missense_variant	2519	2519	840	N/I	aAt/aTt	-	-	1	DENND3	HGNC	HGNC:29134	protein_coding	YES	deleterious(0)
13:36546279	T	ENSCAFG00000001264	ENSCAFT00000001952	Transcript	missense_variant	448	145	49	E/K	Gag/Aag	-	-	-1	-	-	-	protein_coding	YES	deleterious(0)
13:36628688	T	ENSCAFG00000001269	ENSCAFT00000001959	Transcript	missense_variant	684	392	131	P/L	cCc/cTc	-	-	1	BAI1	HGNC	HGNC:943	protein_coding	YES	deleterious(0.01)
13:36708155	A	ENSCAFG00000001272	ENSCAFT00000001964	Transcript	missense_variant	1942	1942	648	L/F	Ctc/Ttc	-	-	-1	-	-	-	protein_coding	YES	deleterious(0.01)
13:36879487	A	ENSCAFG00000001285	ENSCAFT00000001992	Transcript	missense_variant	1366	1366	456	A/T	Gcc/Acc	-	-	1	-	-	-	protein_coding	YES	deleterious(0)
13:37035270-37035279	-	ENSCAFG00000029287	ENSCAFT00000046105	Transcript	inframe_deletion	1130-1138	1092-1100	364-367	FACG/F	ttCGCCTGCGGc/ttc	-	-	1	GLI4	HGNC	HGNC:4320	protein_coding	YES	-
13:37123549-37123560	-	ENSCAFG00000032457	ENSCAFT00000049608	Transcript	frameshift_variant,feature_truncation	212-222	212-222	71-74	-	-	-	-	-1	MAFA	HGNC	HGNC:23145	protein_coding	YES	-
13:37226053	A	ENSCAFG00000001301	ENSCAFT00000038192	Transcript	missense_variant	1273	959	320	G/D	gGc/gAc	-	-	1	GSDMD	HGNC	HGNC:25697	protein_coding	YES	deleterious(0.03)
13:37261221	T	ENSCAFG00000001325	ENSCAFT00000002059	Transcript	missense_variant	448	433	145	V/I	Gtt/Att	-	-	-1	PYCRL	HGNC	HGNC:25846	protein_coding	YES	deleterious(0.02)
13:37321578	T	ENSCAFG00000001338	ENSCAFT00000002081	Transcript	missense_variant	1053	1009	337	R/C	Cgc/Tgc	-	-	1	MAPK15	HGNC	HGNC:24667	protein_coding	YES	deleterious(0)
13:37326488-37326489	-	ENSCAFG00000032391	ENSCAFT00000049368	Transcript	frameshift_variant,feature_truncation	2582	2582	861	-	-	-	-	-1	FAM83H	Uniprot_gn	-	protein_coding	YES	-
13:37326691-37326719	-	ENSCAFG00000032391	ENSCAFT00000049368	Transcript	frameshift_variant,feature_truncation	2352-2379	2352-2379	784-793	-	-	-	-	-1	FAM83H	Uniprot_gn	-	protein_coding	YES	-
13:37326987	G	ENSCAFG00000032391	ENSCAFT00000049368	Transcript	missense_variant	2084	2084	695	I/T	aTc/aCc	-	-	-1	FAM83H	Uniprot_gn	-	protein_coding	YES	deleterious(0)
13:37365340	T	ENSCAFG00000001372	ENSCAFT00000002152	Transcript	missense_variant	3409	3409	1137	L/M	Ctg/Atg	-	-	-1	SCRIB	HGNC	HGNC:30377	protein_coding	YES	deleterious(0)
13:37375884-37375912	-	ENSCAFG00000001400	ENSCAFT00000045695	Transcript	frameshift_variant,feature_truncation	1552-1579	1552-1579	518-527	-	-	-	-	-1	PUF60	HGNC	HGNC:17042	protein_coding	YES	-
13:37452150-37452186	-	ENSCAFG00000001433	ENSCAFT00000002240	Transcript	inframe_deletion	12374-12409	12374-12409	4125-4137	KGLKLTVEEAVRM/M	aAGGGGCTGAAGCTGACCGTGGAGGAGGCCGTGCGCAtg/atg	-	-	-1	PLEC	HGNC	HGNC:9069	protein_coding	YES	-
13:37456402	A	ENSCAFG00000001433	ENSCAFT00000002240	Transcript	frameshift_variant,feature_elongation	8157-8158	8157-8158	2719-2720	-	-	-	-	-1	PLEC	HGNC	HGNC:9069	protein_coding	YES	-
13:37459293-37459299	-	ENSCAFG00000029172	ENSCAFT00000043963	Transcript	inframe_deletion	1831-1836	1831-1836	611-612	RR/-	CGCAGG/-	-	-	1	-	-	-	protein_coding	YES	-
13:37459293-37459299	-	ENSCAFG00000001433	ENSCAFT00000002240	Transcript	inframe_deletion	5361-5366	5361-5366	1787-1789	RLR/R	cgCCTGCGg/cgg	-	-	-1	PLEC	HGNC	HGNC:9069	protein_coding	YES	-
13:37459647-37459653	-	ENSCAFG00000001433	ENSCAFT00000002240	Transcript	inframe_deletion	5007-5012	5007-5012	1669-1671	AEA/A	gcCGAGGCg/gcg	-	-	-1	PLEC	HGNC	HGNC:9069	protein_coding	YES	-
13:37468397	A	ENSCAFG00000001433	ENSCAFT00000002240	Transcript	frameshift_variant,feature_elongation	1578-1579	1578-1579	526-527	-	-	-	-	-1	PLEC	HGNC	HGNC:9069	protein_coding	YES	-
13:37531279	C	ENSCAFG00000001449	ENSCAFT00000002256	Transcript	missense_variant	99	99	33	E/D	gaG/gaC	-	-	1	SPATC1	HGNC	HGNC:30510	protein_coding	YES	deleterious(0)
13:37542745	T	ENSCAFG00000001449	ENSCAFT00000002256	Transcript	missense_variant	539	539	180	A/V	gCg/gTg	-	-	1	SPATC1	HGNC	HGNC:30510	protein_coding	YES	deleterious(0.01)
13:37554836-37554886	-	ENSCAFG00000032288	ENSCAFT00000046368	Transcript	splice_acceptor_variant,coding_sequence_variant,intron_variant,feature_truncation	?-1136	?-1136	?-379	-	-	-	-	1	-	-	-	protein_coding	-	-
13:37554836-37554886	-	ENSCAFG00000032288	ENSCAFT00000048325	Transcript	splice_acceptor_variant,coding_sequence_variant,intron_variant,feature_truncation	?-1241	?-1241	?-414	-	-	-	-	1	-	-	-	protein_coding	YES	-
13:37561137-37561138	-	ENSCAFG00000001500	ENSCAFT00000002350	Transcript	frameshift_variant,feature_truncation	2277	1236	412	-	-	-	-	-1	OPLAH	HGNC	HGNC:8149	protein_coding	YES	-
13:37561748-37561749	-	ENSCAFG00000001500	ENSCAFT00000002350	Transcript	frameshift_variant,feature_truncation	1874	833	278	-	-	-	-	-1	OPLAH	HGNC	HGNC:8149	protein_coding	YES	-
13:37561750	G	ENSCAFG00000001500	ENSCAFT00000002350	Transcript	missense_variant,splice_region_variant	1873	832	278	G/R	Ggc/Cgc	-	-	-1	OPLAH	HGNC	HGNC:8149	protein_coding	YES	deleterious(0)
13:37579804	A	ENSCAFG00000001523	ENSCAFT00000002378	Transcript	stop_gained	1556	1556	519	S/*	tCa/tAa	-	-	1	GPAA1	HGNC	HGNC:4446	protein_coding	YES	-
13:37591912-37591915	-	ENSCAFG00000001529	ENSCAFT00000002390	Transcript	inframe_deletion	363-365	363-365	121-122	CS/C	tgCTCc/tgc	-	-	1	CYC1	HGNC	HGNC:2579	protein_coding	YES	-
13:37597533-37597543	-	ENSCAFG00000029569	ENSCAFT00000049607	Transcript	frameshift_variant,feature_truncation	175-184	175-184	59-62	-	-	-	-	1	-	-	-	protein_coding	YES	-
13:37622859	T	ENSCAFG00000001541	ENSCAFT00000002403	Transcript	stop_gained	892	892	298	R/*	Cga/Tga	-	-	1	FAM203A	HGNC	HGNC:24161	protein_coding	YES	-
13:37673755	C	ENSCAFG00000001546	ENSCAFT00000002414	Transcript	splice_donor_variant	-	-	-	-	-	-	-	1	MROH1	HGNC	HGNC:26958	protein_coding	YES	-
13:37748026	A	ENSCAFG00000024926	ENSCAFT00000002462	Transcript	missense_variant	1182	805	269	P/S	Ccc/Tcc	-	-	-1	DGAT1	HGNC	HGNC:2843	protein_coding	YES	deleterious(0)
13:37861168	A	ENSCAFG00000001624	ENSCAFT00000002553	Transcript	missense_variant	739	739	247	R/C	Cgc/Tgc	-	-	-1	CYHR1	HGNC	HGNC:17806	protein_coding	YES	deleterious(0.01)
13:37863923	A	ENSCAFG00000001624	ENSCAFT00000002553	Transcript	missense_variant	259	259	87	H/Y	Cac/Tac	-	-	-1	CYHR1	HGNC	HGNC:17806	protein_coding	YES	deleterious(0)
13:37877660	C	ENSCAFG00000001627	ENSCAFT00000002564	Transcript	missense_variant	796	796	266	A/P	Gcc/Ccc	-	-	1	KIFC2	HGNC	HGNC:29530	protein_coding	YES	deleterious(0.03)
13:37883803	T	ENSCAFG00000001632	ENSCAFT00000002568	Transcript	missense_variant	1450	1450	484	D/N	Gat/Aat	-	-	-1	FOXH1	HGNC	HGNC:3814	protein_coding	YES	deleterious(0)
13:37931214	T	ENSCAFG00000001569	ENSCAFT00000002463	Transcript	missense_variant	3397	3397	1133	G/R	Ggg/Agg	-	-	-1	RECQL4	HGNC	HGNC:9949	protein_coding	YES	deleterious(0)
13:37931370	T	ENSCAFG00000001569	ENSCAFT00000002463	Transcript	missense_variant	3346	3346	1116	A/T	Gcc/Acc	-	-	-1	RECQL4	HGNC	HGNC:9949	protein_coding	YES	deleterious(0)
13:37933646	A	ENSCAFG00000001569	ENSCAFT00000002463	Transcript	missense_variant	1973	1973	658	T/M	aCg/aTg	-	-	-1	RECQL4	HGNC	HGNC:9949	protein_coding	YES	deleterious(0)
13:37933906	A	ENSCAFG00000001569	ENSCAFT00000002463	Transcript	missense_variant	1787	1787	596	T/M	aCg/aTg	-	-	-1	RECQL4	HGNC	HGNC:9949	protein_coding	YES	deleterious(0)
13:37934024-37934027	-	ENSCAFG00000001569	ENSCAFT00000002463	Transcript	inframe_deletion,splice_region_variant	1741-1743	1741-1743	581	K/-	AAG/-	-	-	-1	RECQL4	HGNC	HGNC:9949	protein_coding	YES	-
13:37934721-37934722	-	ENSCAFG00000001569	ENSCAFT00000002463	Transcript	frameshift_variant,feature_truncation	1474	1474	492	-	-	-	-	-1	RECQL4	HGNC	HGNC:9949	protein_coding	YES	-
13:37941708	T	ENSCAFG00000028687	ENSCAFT00000046069	Transcript	missense_variant	1753	1410	470	M/I	atG/atA	-	-	-1	LRRC24	HGNC	HGNC:28947	protein_coding	YES	deleterious(0)
13:37953614-37953616	-	ENSCAFG00000001669	ENSCAFT00000002618	Transcript	frameshift_variant,feature_truncation	2529-2530	2529-2530	843-844	-	-	-	-	-1	ARHGAP39	HGNC	HGNC:29351	protein_coding	YES	-
13:37982723	G	ENSCAFG00000001669	ENSCAFT00000002618	Transcript	missense_variant	186	186	62	K/N	aaG/aaC	-	-	-1	ARHGAP39	HGNC	HGNC:29351	protein_coding	YES	deleterious(0.01)
13:38336560-38336591	-	ENSCAFG00000001710	ENSCAFT00000002688	Transcript	frameshift_variant,feature_truncation	1119-1149	1119-1149	373-383	-	-	-	-	1	CHRNA3	HGNC	HGNC:1957	protein_coding	YES	-
13:3837748	T	ENSCAFG00000000602	ENSCAFT00000000935	Transcript	missense_variant	187	187	63	A/T	Gcc/Acc	-	-	-1	RRM2B	HGNC	HGNC:17296	protein_coding	YES	deleterious(0.05)
13:38392798	T	ENSCAFG00000030589	ENSCAFT00000042941	Transcript	missense_variant	558	283	95	G/S	Ggc/Agc	-	-	-1	HYKK	HGNC	HGNC:34403	protein_coding	YES	deleterious(0)
13:38739738	T	ENSCAFG00000001792	ENSCAFT00000002813	Transcript	missense_variant	925	925	309	R/W	Cgg/Tgg	-	-	1	LIMCH1	HGNC	HGNC:29191	protein_coding	YES	deleterious(0)
13:38761613	T	ENSCAFG00000001792	ENSCAFT00000002813	Transcript	missense_variant	1072	1072	358	R/C	Cgc/Tgc	-	-	1	LIMCH1	HGNC	HGNC:29191	protein_coding	YES	deleterious(0)
13:38798915	G	ENSCAFG00000001792	ENSCAFT00000002813	Transcript	frameshift_variant,feature_elongation	2629-2630	2629-2630	877	-	-	-	-	1	LIMCH1	HGNC	HGNC:29191	protein_coding	YES	-
13:3906710	G	ENSCAFG00000000619	ENSCAFT00000047363	Transcript	missense_variant	5215	5215	1739	E/Q	Gaa/Caa	-	-	-1	UBR5	HGNC	HGNC:16806	protein_coding	YES	deleterious(0)
13:39117451	T	ENSCAFG00000001798	ENSCAFT00000002830	Transcript	missense_variant	1000	1000	334	R/C	Cgt/Tgt	-	-	1	SLC30A9	HGNC	HGNC:1329	protein_coding	YES	deleterious(0)
13:39118071-39118097	-	ENSCAFG00000001798	ENSCAFT00000002830	Transcript	frameshift_variant,feature_truncation	1117-1142	1117-1142	373-381	-	-	-	-	1	SLC30A9	HGNC	HGNC:1329	protein_coding	YES	-
13:3916144	G	ENSCAFG00000000619	ENSCAFT00000047363	Transcript	missense_variant,splice_region_variant	3481	3481	1161	G/R	Ggt/Cgt	-	-	-1	UBR5	HGNC	HGNC:16806	protein_coding	YES	deleterious(0)
13:3923324	G	ENSCAFG00000000619	ENSCAFT00000047363	Transcript	missense_variant	2738	2738	913	L/P	cTa/cCa	-	-	-1	UBR5	HGNC	HGNC:16806	protein_coding	YES	deleterious(0)
13:39359431	G	ENSCAFG00000001804	ENSCAFT00000002835	Transcript	missense_variant	145	145	49	S/G	Agc/Ggc	-	-	1	SHISA3	HGNC	HGNC:25159	protein_coding	YES	deleterious(0.02)
13:40977264	A	ENSCAFG00000001828	ENSCAFT00000002883	Transcript	missense_variant	706	706	236	R/C	Cgc/Tgc	-	-	-1	KCTD8	HGNC	HGNC:22394	protein_coding	YES	deleterious(0)
13:41019	A	ENSCAFG00000000460	ENSCAFT00000000736	Transcript	missense_variant	71	71	24	A/D	gCc/gAc	-	-	1	LAPTM4B	HGNC	HGNC:13646	protein_coding	YES	deleterious(0.01)
13:41129796	T	ENSCAFG00000001830	ENSCAFT00000002885	Transcript	missense_variant	211	211	71	E/K	Gag/Aag	-	-	-1	-	-	-	protein_coding	YES	deleterious(0.03)
13:41142505	T	ENSCAFG00000001832	ENSCAFT00000002888	Transcript	missense_variant	554	554	185	G/E	gGg/gAg	-	-	-1	YIPF7	HGNC	HGNC:26825	protein_coding	YES	deleterious(0.02)
13:41164342	T	ENSCAFG00000001832	ENSCAFT00000002888	Transcript	missense_variant	20	20	7	A/E	gCa/gAa	-	-	-1	YIPF7	HGNC	HGNC:26825	protein_coding	YES	deleterious(0.02)
13:42200444	A	ENSCAFG00000001878	ENSCAFT00000002978	Transcript	frameshift_variant,feature_elongation	1349-1350	1349-1350	450	-	-	-	-	-1	GABRG1	HGNC	HGNC:4086	protein_coding	YES	-
13:42211826	T	ENSCAFG00000001878	ENSCAFT00000002978	Transcript	missense_variant	1009	1009	337	D/N	Gat/Aat	-	-	-1	GABRG1	HGNC	HGNC:4086	protein_coding	YES	deleterious(0)
13:42222377	T	ENSCAFG00000001878	ENSCAFT00000002978	Transcript	stop_gained	522	522	174	W/*	tgG/tgA	-	-	-1	GABRG1	HGNC	HGNC:4086	protein_coding	YES	-
13:42222393	T	ENSCAFG00000001878	ENSCAFT00000002978	Transcript	missense_variant	506	506	169	R/H	cGt/cAt	-	-	-1	GABRG1	HGNC	HGNC:4086	protein_coding	YES	deleterious(0.04)
13:42262314	T	ENSCAFG00000001878	ENSCAFT00000002978	Transcript	missense_variant	127	127	43	D/N	Gat/Aat	-	-	-1	GABRG1	HGNC	HGNC:4086	protein_coding	YES	deleterious(0.03)
13:42381346-42381352	-	ENSCAFG00000025069	ENSCAFT00000002984	Transcript	stop_gained,inframe_deletion	1059-1064	983-988	328-330	FTK/*	tTCACCAaa/taa	-	-	-1	GABRA2	HGNC	HGNC:4076	protein_coding	YES	-
13:42930393	A	ENSCAFG00000024571	ENSCAFT00000037915	Transcript	stop_gained	1062	808	270	Q/*	Cag/Tag	-	-	-1	GABRA4	HGNC	HGNC:4078	protein_coding	YES	-
13:42941187	T	ENSCAFG00000024571	ENSCAFT00000037915	Transcript	splice_acceptor_variant	-	-	-	-	-	-	-	-1	GABRA4	HGNC	HGNC:4078	protein_coding	YES	-
13:42941453-42941457	-	ENSCAFG00000024571	ENSCAFT00000037915	Transcript	frameshift_variant,feature_truncation	382-385	128-131	43-44	-	-	-	-	-1	GABRA4	HGNC	HGNC:4078	protein_coding	YES	-
13:43511204	G	ENSCAFG00000001907	ENSCAFT00000003024	Transcript	missense_variant	2716	2716	906	Y/H	Tat/Cat	-	-	-1	CORIN	HGNC	HGNC:19012	protein_coding	YES	deleterious(0.01)
13:43831945	T	ENSCAFG00000001917	ENSCAFT00000039419	Transcript	stop_gained	2202	1620	540	Y/*	taC/taA	-	-	-1	CNGA1	Uniprot_gn	-	protein_coding	YES	-
13:43832191	A	ENSCAFG00000001917	ENSCAFT00000039419	Transcript	missense_variant	1956	1374	458	L/F	ttG/ttT	-	-	-1	CNGA1	Uniprot_gn	-	protein_coding	YES	deleterious(0)
13:43835325-43835327	-	ENSCAFG00000001917	ENSCAFT00000039419	Transcript	frameshift_variant,feature_truncation	1026-1027	444-445	148-149	-	-	-	-	-1	CNGA1	Uniprot_gn	-	protein_coding	YES	-
13:43897478	A	ENSCAFG00000031803	ENSCAFT00000047021	Transcript	missense_variant	1049	1049	350	G/D	gGc/gAc	-	-	1	NIPAL1	HGNC	HGNC:27194	protein_coding	YES	deleterious(0)
13:44729259	A	ENSCAFG00000001997	ENSCAFT00000003159	Transcript	stop_gained	402	402	134	W/*	tgG/tgA	-	-	1	CWH43	HGNC	HGNC:26133	protein_coding	YES	-
13:44944317	A	ENSCAFG00000024651	ENSCAFT00000038023	Transcript	missense_variant	2449	2351	784	P/L	cCc/cTc	-	-	-1	LRRC66	HGNC	HGNC:34299	protein_coding	YES	deleterious(0)
13:4534186	G	ENSCAFG00000000649	ENSCAFT00000001002	Transcript	missense_variant	1130	323	108	D/G	gAc/gGc	-	-	1	ATP6V1C1	HGNC	HGNC:856	protein_coding	YES	deleterious(0.02)
13:45600994	T	ENSCAFG00000002031	ENSCAFT00000003218	Transcript	splice_acceptor_variant	-	-	-	-	-	-	-	-1	SCFD2	HGNC	HGNC:30676	protein_coding	YES	-
13:46069358	A	ENSCAFG00000002034	ENSCAFT00000003220	Transcript	missense_variant	1193	1193	398	G/E	gGa/gAa	-	-	1	FIP1L1	HGNC	HGNC:19124	protein_coding	YES	deleterious(0)
13:47176916-47176936	-	ENSCAFG00000002065	ENSCAFT00000049830	Transcript	splice_acceptor_variant,coding_sequence_variant,intron_variant,feature_truncation	?-2100	?-1370	?-457	-	-	-	-	1	KIT	Uniprot_gn	-	protein_coding	YES	-
13:47176916-47176936	-	ENSCAFG00000002065	ENSCAFT00000003274	Transcript	splice_acceptor_variant,coding_sequence_variant,intron_variant,feature_truncation	?-1334	?-1334	?-445	-	-	-	-	1	KIT	Uniprot_gn	-	protein_coding	-	-
13:4733268	T	ENSCAFG00000000654	ENSCAFT00000001009	Transcript	stop_gained	312	91	31	R/*	Cga/Tga	-	-	1	FZD6	HGNC	HGNC:4044	protein_coding	YES	-
13:47461085	A	ENSCAFG00000002079	ENSCAFT00000003300	Transcript	missense_variant	2620	2296	766	I/F	Att/Ttt	-	-	-1	KDR	Uniprot_gn	-	protein_coding	YES	deleterious(0)
13:47466431	T	ENSCAFG00000002079	ENSCAFT00000003300	Transcript	missense_variant	2136	1812	604	N/K	aaC/aaA	-	-	-1	KDR	Uniprot_gn	-	protein_coding	YES	deleterious(0.01)
13:47678112	C	ENSCAFG00000002094	ENSCAFT00000003310	Transcript	missense_variant	1381	620	207	R/P	cGa/cCa	-	-	1	TMEM165	HGNC	HGNC:30760	protein_coding	YES	deleterious(0.03)
13:48234749	T	ENSCAFG00000002189	ENSCAFT00000003446	Transcript	missense_variant	1571	1571	524	S/F	tCc/tTc	-	-	1	CEP135	HGNC	HGNC:29086	protein_coding	YES	deleterious(0.02)
13:4824517	T	ENSCAFG00000028968	ENSCAFT00000049521	Transcript	missense_variant	578	578	193	G/E	gGa/gAa	-	-	-1	SLC25A32	HGNC	HGNC:29683	protein_coding	YES	deleterious(0)
13:48578102	T	ENSCAFG00000002209	ENSCAFT00000003472	Transcript	stop_gained	3459	2784	928	W/*	tgG/tgA	-	-	-1	AASDH	HGNC	HGNC:23993	protein_coding	YES	-
13:48589700	T	ENSCAFG00000002209	ENSCAFT00000003472	Transcript	missense_variant	1847	1172	391	G/E	gGa/gAa	-	-	-1	AASDH	HGNC	HGNC:23993	protein_coding	YES	deleterious(0)
13:48607176-48607177	-	ENSCAFG00000002209	ENSCAFT00000003472	Transcript	frameshift_variant,feature_truncation	984	309	103	-	-	-	-	-1	AASDH	HGNC	HGNC:23993	protein_coding	YES	-
13:48626591	C	ENSCAFG00000002217	ENSCAFT00000003495	Transcript	missense_variant	596	596	199	D/G	gAt/gGt	-	-	-1	PPAT	HGNC	HGNC:9238	protein_coding	YES	deleterious(0)
13:48629544	T	ENSCAFG00000002217	ENSCAFT00000003495	Transcript	missense_variant	269	269	90	G/E	gGa/gAa	-	-	-1	PPAT	HGNC	HGNC:9238	protein_coding	YES	deleterious(0)
13:48672069	A	ENSCAFG00000002236	ENSCAFT00000003512	Transcript	missense_variant	1995	826	276	A/T	Gca/Aca	-	-	1	PAICS	HGNC	HGNC:8587	protein_coding	YES	deleterious(0.02)
13:48738165	A	ENSCAFG00000002248	ENSCAFT00000048855	Transcript	missense_variant	793	793	265	Q/K	Caa/Aaa	-	-	1	ARL9	HGNC	HGNC:23592	protein_coding	YES	deleterious(0.02)
13:48829896	T	ENSCAFG00000031330	ENSCAFT00000042899	Transcript	missense_variant	508	211	71	V/M	Gtg/Atg	-	-	-1	HOPX	HGNC	HGNC:24961	protein_coding	YES	deleterious(0)
13:49120986	G	ENSCAFG00000002296	ENSCAFT00000003641	Transcript	missense_variant	2479	2146	716	H/D	Cat/Gat	-	-	1	POLR2B	HGNC	HGNC:9188	protein_coding	YES	deleterious(0)
13:49133315	C	ENSCAFG00000002296	ENSCAFT00000003641	Transcript	missense_variant	3355	3022	1008	V/L	Gtg/Ctg	-	-	1	POLR2B	HGNC	HGNC:9188	protein_coding	YES	deleterious(0.04)
13:5220652	A	ENSCAFG00000000670	ENSCAFT00000001036	Transcript	missense_variant	2315	2315	772	G/D	gGt/gAt	-	-	1	RIMS2	HGNC	HGNC:17283	protein_coding	YES	deleterious(0)
13:53402749	A	ENSCAFG00000002364	ENSCAFT00000003726	Transcript	missense_variant	457	457	153	A/T	Gcc/Acc	-	-	1	LPHN3	HGNC	HGNC:20974	protein_coding	YES	deleterious(0.03)
13:5496481	A	ENSCAFG00000000670	ENSCAFT00000001036	Transcript	stop_gained	4317	4317	1439	W/*	tgG/tgA	-	-	1	RIMS2	HGNC	HGNC:17283	protein_coding	YES	-
13:5496567	T	ENSCAFG00000000670	ENSCAFT00000001036	Transcript	missense_variant	4403	4403	1468	S/L	tCa/tTa	-	-	1	RIMS2	HGNC	HGNC:17283	protein_coding	YES	deleterious(0)
13:5552733	T	ENSCAFG00000000675	ENSCAFT00000001043	Transcript	missense_variant	634	634	212	R/W	Cgg/Tgg	-	-	1	DCSTAMP	HGNC	HGNC:18549	protein_coding	YES	deleterious(0.03)
13:5553054	T	ENSCAFG00000000675	ENSCAFT00000001043	Transcript	missense_variant	955	955	319	R/W	Cgg/Tgg	-	-	1	DCSTAMP	HGNC	HGNC:18549	protein_coding	YES	deleterious(0.05)
13:56096812	A	ENSCAFG00000002714	ENSCAFT00000004350	Transcript	frameshift_variant,feature_elongation	1276-1277	1276-1277	426	-	-	-	-	-1	EPHA5	HGNC	HGNC:3389	protein_coding	YES	-
13:5624557	C	ENSCAFG00000000676	ENSCAFT00000001047	Transcript	missense_variant,splice_region_variant	1280	1231	411	R/G	Agg/Ggg	-	-	-1	DPYS	HGNC	HGNC:3013	protein_coding	YES	deleterious(0)
13:58020631	A	ENSCAFG00000002751	ENSCAFT00000004388	Transcript	stop_gained	2521	2521	841	R/*	Cga/Tga	-	-	-1	CENPC	HGNC	HGNC:1854	protein_coding	YES	-
13:58081374	T	ENSCAFG00000002751	ENSCAFT00000004388	Transcript	missense_variant	109	109	37	E/K	Gaa/Aaa	-	-	-1	CENPC	HGNC	HGNC:1854	protein_coding	YES	deleterious(0.02)
13:58100515	G	ENSCAFG00000002756	ENSCAFT00000004394	Transcript	missense_variant	20	20	7	P/R	cCg/cGg	-	-	1	STAP1	HGNC	HGNC:24133	protein_coding	YES	deleterious(0)
13:58100530	A	ENSCAFG00000002756	ENSCAFT00000004394	Transcript	missense_variant	35	35	12	R/H	cGc/cAc	-	-	1	STAP1	HGNC	HGNC:24133	protein_coding	YES	deleterious(0)
13:58293872	T	ENSCAFG00000025398	ENSCAFT00000039444	Transcript	missense_variant	657	657	219	D/E	gaC/gaA	-	-	-1	-	-	-	protein_coding	YES	deleterious(0.01)
13:58563030	G	ENSCAFG00000002805	ENSCAFT00000004486	Transcript	missense_variant	716	452	151	L/P	cTc/cCc	-	-	-1	TMPRSS11F	HGNC	HGNC:29994	protein_coding	YES	deleterious(0)
13:58949365-58949366	-	ENSCAFG00000029232	ENSCAFT00000022724	Transcript	frameshift_variant,feature_truncation	290	290	97	-	-	-	-	1	UGT2B31	Uniprot_gn	-	protein_coding	YES	-
13:59083675	A	ENSCAFG00000024836	ENSCAFT00000004578	Transcript	stop_gained	108	108	36	W/*	tgG/tgA	-	-	1	-	-	-	protein_coding	YES	-
13:59241458	T	ENSCAFG00000002871	ENSCAFT00000004591	Transcript	stop_gained	360	360	120	W/*	tgG/tgA	-	-	-1	SULT1B1	Uniprot_gn	-	protein_coding	YES	-
13:59551110-59551111	-	ENSCAFG00000029924	ENSCAFT00000046708	Transcript	frameshift_variant,feature_truncation	511	165	55	-	-	-	-	1	PRR27	HGNC	HGNC:33193	protein_coding	YES	-
13:59657464	A	ENSCAFG00000028973	ENSCAFT00000049242	Transcript	frameshift_variant,feature_elongation	186-187	186-187	62-63	-	-	-	-	1	-	-	-	protein_coding	YES	-
13:59658934-59658935	-	ENSCAFG00000028973	ENSCAFT00000049242	Transcript	frameshift_variant,feature_truncation	817	817	273	-	-	-	-	1	-	-	-	protein_coding	YES	-
13:59692064	T	ENSCAFG00000002893	ENSCAFT00000004623	Transcript	missense_variant	416	416	139	A/V	gCa/gTa	-	-	1	CABS1	HGNC	HGNC:30710	protein_coding	YES	deleterious(0.02)
13:59912472	A	ENSCAFG00000002904	ENSCAFT00000004648	Transcript	stop_gained	1292	1292	431	W/*	tGg/tAg	-	-	1	AMBN	HGNC	HGNC:452	protein_coding	YES	-
13:60232110	T	ENSCAFG00000002931	ENSCAFT00000004687	Transcript	missense_variant	747	574	192	R/W	Cgg/Tgg	-	-	1	DCK	HGNC	HGNC:2704	protein_coding	YES	deleterious(0)
13:60563514-60563515	-	ENSCAFG00000002939	ENSCAFT00000004709	Transcript	frameshift_variant,feature_truncation	1372	1372	458	-	-	-	-	1	SLC4A4	HGNC	HGNC:11030	protein_coding	YES	-
13:60813473	C	ENSCAFG00000002949	ENSCAFT00000037533	Transcript	missense_variant	464	464	155	D/G	gAt/gGt	-	-	-1	GC	HGNC	HGNC:4187	protein_coding	YES	deleterious(0.01)
13:62167313	A	ENSCAFG00000003016	ENSCAFT00000004843	Transcript	missense_variant	1949	1768	590	G/S	Ggc/Agc	-	-	1	ALB	HGNC	HGNC:399	protein_coding	YES	deleterious(0.05)
13:62194239-62194240	-	ENSCAFG00000003020	ENSCAFT00000004849	Transcript	frameshift_variant,splice_region_variant,feature_truncation	870	845	282	-	-	-	-	1	AFP	EntrezGene	-	protein_coding	YES	-
13:62301124	T	ENSCAFG00000003025	ENSCAFT00000004866	Transcript	missense_variant	1181	863	288	S/Y	tCt/tAt	-	-	-1	RASSF6	HGNC	HGNC:20796	protein_coding	YES	deleterious(0)
13:62931038	A	ENSCAFG00000003075	ENSCAFT00000004935	Transcript	missense_variant	434	434	145	P/H	cCc/cAc	-	-	1	AREG	HGNC	HGNC:651	protein_coding	YES	deleterious(0)
13:7543620	C	ENSCAFG00000000680	ENSCAFT00000001061	Transcript	missense_variant	1059	923	308	H/P	cAt/cCt	-	-	1	OXR1	HGNC	HGNC:15822	protein_coding	YES	deleterious(0.04)
13:7543680	T	ENSCAFG00000000680	ENSCAFT00000001061	Transcript	missense_variant	1119	983	328	P/L	cCg/cTg	-	-	1	OXR1	HGNC	HGNC:15822	protein_coding	YES	deleterious(0)
13:7970985	T	ENSCAFG00000000687	ENSCAFT00000001067	Transcript	missense_variant	122	122	41	T/I	aCc/aTc	-	-	1	-	-	-	protein_coding	YES	deleterious(0.01)
13:87981	T	ENSCAFG00000000460	ENSCAFT00000000736	Transcript	missense_variant	659	659	220	Q/L	cAg/cTg	-	-	1	LAPTM4B	HGNC	HGNC:13646	protein_coding	YES	deleterious(0.01)
13:8851401	T	ENSCAFG00000000702	ENSCAFT00000001095	Transcript	missense_variant	1555	1034	345	C/Y	tGt/tAt	-	-	-1	EIF3E	HGNC	HGNC:3277	protein_coding	YES	deleterious(0)
13:9870078-9870107	-	ENSCAFG00000000719	ENSCAFT00000001120	Transcript	splice_acceptor_variant,coding_sequence_variant,intron_variant,feature_truncation	?-916	?-289	?-97	-	-	-	-	-1	NUDCD1	HGNC	HGNC:24306	protein_coding	YES	-
13:9936264	T	ENSCAFG00000024786	ENSCAFT00000045918	Transcript	missense_variant	326	326	109	S/F	tCc/tTc	-	-	1	PKHD1L1	HGNC	HGNC:20313	protein_coding	YES	deleterious(0.03)
13:9973534	A	ENSCAFG00000024786	ENSCAFT00000045918	Transcript	missense_variant	2872	2872	958	A/T	Gct/Act	-	-	1	PKHD1L1	HGNC	HGNC:20313	protein_coding	YES	deleterious(0.05)
13:9991922	C	ENSCAFG00000024786	ENSCAFT00000045918	Transcript	missense_variant	5158	5158	1720	C/R	Tgt/Cgt	-	-	1	PKHD1L1	HGNC	HGNC:20313	protein_coding	YES	deleterious(0)
13:9995711	T	ENSCAFG00000024786	ENSCAFT00000045918	Transcript	missense_variant	6092	6092	2031	G/V	gGg/gTg	-	-	1	PKHD1L1	HGNC	HGNC:20313	protein_coding	YES	deleterious(0)
14:10988311	T	ENSCAFG00000001754	ENSCAFT00000002746	Transcript	stop_gained	964	22	8	E/*	Gaa/Taa	-	-	1	POT1	HGNC	HGNC:17284	protein_coding	YES	-
14:1107818	T	ENSCAFG00000001187	ENSCAFT00000001838	Transcript	missense_variant	400	310	104	D/Y	Gac/Tac	-	-	1	JMJD4	HGNC	HGNC:25724	protein_coding	YES	deleterious(0)
14:11351170	G	ENSCAFG00000001759	ENSCAFT00000002759	Transcript	missense_variant	656	656	219	E/A	gAa/gCa	-	-	-1	-	-	-	protein_coding	YES	deleterious(0)
14:11351179	C	ENSCAFG00000001759	ENSCAFT00000002759	Transcript	missense_variant	647	647	216	H/R	cAc/cGc	-	-	-1	-	-	-	protein_coding	YES	deleterious(0.02)
14:11351212	C	ENSCAFG00000001759	ENSCAFT00000002759	Transcript	missense_variant	614	614	205	L/R	cTc/cGc	-	-	-1	-	-	-	protein_coding	YES	deleterious(0)
14:11351782	A	ENSCAFG00000001759	ENSCAFT00000002759	Transcript	missense_variant	44	44	15	S/F	tCc/tTc	-	-	-1	-	-	-	protein_coding	YES	deleterious(0.04)
14:11647149	T	ENSCAFG00000001762	ENSCAFT00000002764	Transcript	missense_variant	235	235	79	R/C	Cgc/Tgc	-	-	1	TMEM229A	HGNC	HGNC:37279	protein_coding	YES	deleterious(0.01)
14:11950203	A	ENSCAFG00000001779	ENSCAFT00000002799	Transcript	missense_variant	478	478	160	V/L	Gtg/Ttg	-	-	-1	ASB15	HGNC	HGNC:19767	protein_coding	YES	deleterious(0.03)
14:1234027	T	ENSCAFG00000001190	ENSCAFT00000038890	Transcript	missense_variant	319	319	107	G/W	Ggg/Tgg	-	-	1	OR13G1	HGNC	HGNC:14999	protein_coding	YES	deleterious(0)
14:1234093	T	ENSCAFG00000001190	ENSCAFT00000038890	Transcript	missense_variant	385	385	129	R/C	Cgc/Tgc	-	-	1	OR13G1	HGNC	HGNC:14999	protein_coding	YES	deleterious(0.03)
14:1234337	T	ENSCAFG00000001190	ENSCAFT00000038890	Transcript	missense_variant	629	629	210	T/M	aCg/aTg	-	-	1	OR13G1	HGNC	HGNC:14999	protein_coding	YES	deleterious(0.05)
14:13375878	A	ENSCAFG00000001819	ENSCAFT00000002866	Transcript	missense_variant	2009	1738	580	D/N	Gat/Aat	-	-	1	DMTF1	HGNC	HGNC:14603	protein_coding	YES	deleterious(0)
14:13542859	T	ENSCAFG00000001833	ENSCAFT00000002889	Transcript	missense_variant	3670	3670	1224	A/T	Gcc/Acc	-	-	-1	ABCB4	HGNC	HGNC:45	protein_coding	YES	deleterious(0)
14:13697358	T	ENSCAFG00000001835	ENSCAFT00000002896	Transcript	missense_variant	1874	1481	494	R/H	cGc/cAc	-	-	-1	MDR1	Uniprot_gn	-	protein_coding	YES	deleterious(0.02)
14:13710851	T	ENSCAFG00000001835	ENSCAFT00000002896	Transcript	missense_variant	1076	683	228	G/E	gGa/gAa	-	-	-1	MDR1	Uniprot_gn	-	protein_coding	YES	deleterious(0.01)
14:1387431	T	ENSCAFG00000001195	ENSCAFT00000001847	Transcript	missense_variant	880	880	294	E/K	Gaa/Aaa	-	-	-1	-	-	-	protein_coding	YES	deleterious(0.02)
14:13937207	T	ENSCAFG00000001841	ENSCAFT00000002902	Transcript	stop_gained	1823	852	284	W/*	tgG/tgA	-	-	-1	SLC25A40	HGNC	HGNC:29680	protein_coding	YES	-
14:1572865	T	ENSCAFG00000024736	ENSCAFT00000038187	Transcript	missense_variant	208	208	70	D/N	Gac/Aac	-	-	-1	OR2W3	HGNC	HGNC:15021	protein_coding	YES	deleterious(0)
14:1583264	T	ENSCAFG00000001226	ENSCAFT00000001908	Transcript	missense_variant	1535	1201	401	V/M	Gtg/Atg	-	-	-1	TRIM58	HGNC	HGNC:24150	protein_coding	YES	deleterious(0.02)
14:16130267	A	ENSCAFG00000001870	ENSCAFT00000002959	Transcript	missense_variant	1528	917	306	G/E	gGa/gAa	-	-	1	STEAP2	HGNC	HGNC:17885	protein_coding	YES	deleterious(0)
14:16180953	T	ENSCAFG00000001874	ENSCAFT00000002973	Transcript	missense_variant	862	608	203	S/L	tCg/tTg	-	-	1	C7orf63	HGNC	HGNC:26107	protein_coding	YES	deleterious(0)
14:16209662	T	ENSCAFG00000001874	ENSCAFT00000002973	Transcript	missense_variant	3004	2750	917	P/L	cCt/cTt	-	-	1	C7orf63	HGNC	HGNC:26107	protein_coding	YES	deleterious(0)
14:1626631	T	ENSCAFG00000001236	ENSCAFT00000001921	Transcript	missense_variant	785	785	262	P/L	cCc/cTc	-	-	1	OR11L1	HGNC	HGNC:14998	protein_coding	YES	deleterious(0)
14:17755529	T	ENSCAFG00000001945	ENSCAFT00000003074	Transcript	missense_variant	827	827	276	R/H	cGc/cAc	-	-	-1	CYP51A1	HGNC	HGNC:2649	protein_coding	YES	deleterious(0.03)
14:17860311	T	ENSCAFG00000001961	ENSCAFT00000003109	Transcript	frameshift_variant,feature_elongation	835-836	835-836	279	-	-	-	-	-1	KRIT1	HGNC	HGNC:1573	protein_coding	YES	-
14:18075775	T	ENSCAFG00000001977	ENSCAFT00000003132	Transcript	stop_gained	3702	3702	1234	W/*	tgG/tgA	-	-	-1	PEX1	HGNC	HGNC:8850	protein_coding	YES	-
14:18085373	A	ENSCAFG00000001977	ENSCAFT00000003132	Transcript	stop_gained	2410	2410	804	G/*	Gga/Tga	-	-	-1	PEX1	HGNC	HGNC:8850	protein_coding	YES	-
14:18647644	A	ENSCAFG00000002007	ENSCAFT00000003175	Transcript	missense_variant	1112	1112	371	T/M	aCg/aTg	-	-	-1	SAMD9L	HGNC	HGNC:1349	protein_coding	YES	deleterious(0.01)
14:19902563	A	ENSCAFG00000002069	ENSCAFT00000031580	Transcript	missense_variant	1738	1603	535	G/R	Gga/Aga	-	-	1	COL1A2	HGNC	HGNC:2198	protein_coding	YES	deleterious(0)
14:19911423	T	ENSCAFG00000002069	ENSCAFT00000031580	Transcript	missense_variant	2492	2357	786	T/I	aCt/aTt	-	-	1	COL1A2	HGNC	HGNC:2198	protein_coding	YES	deleterious(0.04)
14:20583485	T	ENSCAFG00000002114	ENSCAFT00000003339	Transcript	missense_variant	428	428	143	V/E	gTg/gAg	-	-	-1	PON1	HGNC	HGNC:9204	protein_coding	YES	deleterious(0)
14:20589085	A	ENSCAFG00000002114	ENSCAFT00000003339	Transcript	missense_variant	323	323	108	D/V	gAt/gTt	-	-	-1	PON1	HGNC	HGNC:9204	protein_coding	YES	deleterious(0)
14:20618667	G	ENSCAFG00000002118	ENSCAFT00000003345	Transcript	missense_variant	1460	788	263	L/S	tTg/tCg	-	-	-1	PON3	HGNC	HGNC:9206	protein_coding	YES	deleterious(0)
14:20838924	A	ENSCAFG00000002129	ENSCAFT00000003358	Transcript	missense_variant	107	107	36	S/F	tCc/tTc	-	-	-1	PDK4	HGNC	HGNC:8812	protein_coding	YES	deleterious(0)
14:21220098	A	ENSCAFG00000002143	ENSCAFT00000003385	Transcript	missense_variant	2087	1415	472	G/E	gGa/gAa	-	-	1	DYNC1I1	HGNC	HGNC:2963	protein_coding	YES	deleterious(0)
14:21297353	T	ENSCAFG00000002161	ENSCAFT00000003424	Transcript	missense_variant	2124	1654	552	A/T	Gcc/Acc	-	-	-1	SLC25A13	HGNC	HGNC:10983	protein_coding	YES	deleterious(0.03)
14:21443056	A	ENSCAFG00000002161	ENSCAFT00000003424	Transcript	stop_gained	669	199	67	Q/*	Cag/Tag	-	-	-1	SLC25A13	HGNC	HGNC:10983	protein_coding	YES	-
14:21807850	G	ENSCAFG00000002184	ENSCAFT00000003437	Transcript	missense_variant	641	641	214	E/A	gAa/gCa	-	-	-1	-	-	-	protein_coding	YES	deleterious(0)
14:22066109	A	ENSCAFG00000002187	ENSCAFT00000003439	Transcript	missense_variant	43	43	15	D/N	Gac/Aac	-	-	1	DLX6	HGNC	HGNC:2919	protein_coding	YES	deleterious(0.02)
14:22730401	T	ENSCAFG00000002222	ENSCAFT00000003490	Transcript	stop_gained	568	15	5	W/*	tgG/tgA	-	-	-1	ASNS	HGNC	HGNC:753	protein_coding	YES	-
14:22890475	A	ENSCAFG00000002227	ENSCAFT00000003498	Transcript	missense_variant	259	259	87	V/I	Gtt/Att	-	-	1	C1GALT1	HGNC	HGNC:24337	protein_coding	YES	deleterious(0.05)
14:23090841	A	ENSCAFG00000029367	ENSCAFT00000044570	Transcript	missense_variant	1538	1345	449	P/S	Cct/Tct	-	-	-1	COL28A1	HGNC	HGNC:22442	protein_coding	YES	deleterious(0.04)
14:26367926	T	ENSCAFG00000002280	ENSCAFT00000039001	Transcript	frameshift_variant,feature_elongation	4195-4196	4195-4196	1399	-	-	-	-	-1	THSD7A	HGNC	HGNC:22207	protein_coding	YES	-
14:26423032	A	ENSCAFG00000002280	ENSCAFT00000039001	Transcript	missense_variant	2396	2396	799	R/L	cGg/cTg	-	-	-1	THSD7A	HGNC	HGNC:22207	protein_coding	YES	deleterious(0)
14:26591858	C	ENSCAFG00000002280	ENSCAFT00000039001	Transcript	missense_variant	785	785	262	S/W	tCg/tGg	-	-	-1	THSD7A	HGNC	HGNC:22207	protein_coding	YES	deleterious(0.01)
14:2695652-2695662	-	ENSCAFG00000001270	ENSCAFT00000001958	Transcript	frameshift_variant,feature_truncation	337-346	337-346	113-116	-	-	-	-	1	COR2T18	EntrezGene	-	protein_coding	YES	-
14:2712174-2712176	-	ENSCAFG00000031139	ENSCAFT00000001961	Transcript	frameshift_variant,feature_truncation	924-925	924-925	308-309	-	-	-	-	-1	-	-	-	protein_coding	YES	-
14:27229309	T	ENSCAFG00000002308	ENSCAFT00000003618	Transcript	missense_variant	3577	3577	1193	V/M	Gtg/Atg	-	-	-1	VWDE	HGNC	HGNC:21897	protein_coding	YES	deleterious(0)
14:27245369	T	ENSCAFG00000002308	ENSCAFT00000003618	Transcript	missense_variant	1643	1643	548	G/D	gGc/gAc	-	-	-1	VWDE	HGNC	HGNC:21897	protein_coding	YES	deleterious(0)
14:31026655	A	ENSCAFG00000002426	ENSCAFT00000003815	Transcript	missense_variant	83	83	28	A/V	gCc/gTc	-	-	-1	SOSTDC1	HGNC	HGNC:21748	protein_coding	YES	deleterious(0)
14:3125784	C	ENSCAFG00000001300	ENSCAFT00000002018	Transcript	missense_variant	141	94	32	G/R	Ggg/Cgg	-	-	1	SLC35B4	EntrezGene	-	protein_coding	YES	deleterious(0)
14:33888517-33888518	-	ENSCAFG00000002513	ENSCAFT00000003966	Transcript	frameshift_variant,feature_truncation	210	210	70	-	-	-	-	-1	TMEM196	HGNC	HGNC:22431	protein_coding	YES	-
14:34720479	T	ENSCAFG00000002654	ENSCAFT00000004202	Transcript	missense_variant	2387	2387	796	A/V	gCc/gTc	-	-	1	ABCB5	HGNC	HGNC:46	protein_coding	YES	deleterious(0)
14:35502444	T	ENSCAFG00000002717	ENSCAFT00000004311	Transcript	stop_gained	1630	1630	544	E/*	Gaa/Taa	-	-	1	DNAH11	HGNC	HGNC:2942	protein_coding	YES	-
14:35787843-35787844	-	ENSCAFG00000002728	ENSCAFT00000004334	Transcript	frameshift_variant,feature_truncation	1501	943	315	-	-	-	-	-1	CDCA7L	HGNC	HGNC:30777	protein_coding	YES	-
14:37166817	T	ENSCAFG00000002788	ENSCAFT00000004456	Transcript	missense_variant	470	470	157	G/E	gGa/gAa	-	-	-1	TRA2A	HGNC	HGNC:16645	protein_coding	YES	deleterious(0.04)
14:37666244	T	ENSCAFG00000025207	ENSCAFT00000039076	Transcript	missense_variant	389	389	130	T/I	aCc/aTc	-	-	1	-	-	-	protein_coding	YES	deleterious(0.04)
14:3979064-3979077	-	ENSCAFG00000001308	ENSCAFT00000002031	Transcript	frameshift_variant,feature_truncation	1193-1205	1081-1093	361-365	-	-	-	-	-1	EXOC4	HGNC	HGNC:30389	protein_coding	YES	-
14:3979143	A	ENSCAFG00000001308	ENSCAFT00000002031	Transcript	missense_variant	1127	1015	339	L/F	Ctt/Ttt	-	-	-1	EXOC4	HGNC	HGNC:30389	protein_coding	YES	deleterious(0.01)
14:40268240	A	ENSCAFG00000002936	ENSCAFT00000004700	Transcript	missense_variant	962	962	321	P/L	cCg/cTg	-	-	-1	HOXA1	HGNC	HGNC:5099	protein_coding	YES	deleterious(0)
14:40282583	A	ENSCAFG00000032285	ENSCAFT00000046660	Transcript	stop_gained	1007	550	184	K/*	Aag/Tag	-	-	-1	HOXA3	HGNC	HGNC:5104	protein_coding	YES	-
14:40284015	A	ENSCAFG00000032285	ENSCAFT00000046660	Transcript	missense_variant	969	512	171	T/I	aCc/aTc	-	-	-1	HOXA3	HGNC	HGNC:5104	protein_coding	YES	deleterious(0.01)
14:40303049	A	ENSCAFG00000002948	ENSCAFT00000004722	Transcript	missense_variant	721	721	241	R/C	Cgc/Tgc	-	-	-1	HOXA4	HGNC	HGNC:5105	protein_coding	YES	deleterious(0)
14:40338069	C	ENSCAFG00000002961	ENSCAFT00000004746	Transcript	missense_variant	749	749	250	V/G	gTg/gGg	-	-	-1	-	-	-	protein_coding	YES	deleterious(0)
14:40421751	A	ENSCAFG00000002971	ENSCAFT00000004757	Transcript	missense_variant	932	932	311	R/H	cGc/cAc	-	-	1	EVX1	HGNC	HGNC:3506	protein_coding	YES	deleterious(0.03)
14:42003295	T	ENSCAFG00000003014	ENSCAFT00000004835	Transcript	missense_variant	1103	1103	368	R/H	cGc/cAc	-	-	-1	TRIL	HGNC	HGNC:22200	protein_coding	YES	deleterious(0.04)
14:42003415	T	ENSCAFG00000003014	ENSCAFT00000004835	Transcript	missense_variant	983	983	328	R/H	cGc/cAc	-	-	-1	TRIL	HGNC	HGNC:22200	protein_coding	YES	deleterious(0.01)
14:43564381	G	ENSCAFG00000003100	ENSCAFT00000004974	Transcript	stop_gained	3094	2118	706	Y/*	taC/taG	-	-	1	FAM188B	HGNC	HGNC:21916	protein_coding	YES	-
14:43592636	T	ENSCAFG00000003102	ENSCAFT00000004976	Transcript	missense_variant	340	340	114	L/F	Ctc/Ttc	-	-	1	AQP1	Uniprot_gn	-	protein_coding	YES	deleterious(0)
14:43914820	T	ENSCAFG00000003122	ENSCAFT00000005020	Transcript	missense_variant	343	343	115	D/N	Gac/Aac	-	-	-1	NEUROD6	HGNC	HGNC:13804	protein_coding	YES	deleterious(0)
14:44156220-44156225	-	ENSCAFG00000003125	ENSCAFT00000005024	Transcript	splice_acceptor_variant,coding_sequence_variant,feature_truncation	?-2675	?-2675	?-892	-	-	-	-	1	CCDC129	HGNC	HGNC:27363	protein_coding	YES	-
14:44156220-44156225	-	ENSCAFG00000003125	ENSCAFT00000005026	Transcript	splice_acceptor_variant,coding_sequence_variant,feature_truncation	?-2874	?-2702	?-901	-	-	-	-	1	CCDC129	HGNC	HGNC:27363	protein_coding	-	-
14:46073482	C	ENSCAFG00000003167	ENSCAFT00000005098	Transcript	missense_variant	1405	1388	463	N/T	aAc/aCc	-	-	1	BMPER	HGNC	HGNC:24154	protein_coding	YES	deleterious(0)
14:46667889	A	ENSCAFG00000003174	ENSCAFT00000005108	Transcript	stop_gained	1877	1432	478	Q/*	Caa/Taa	-	-	-1	DPY19L1	HGNC	HGNC:22205	protein_coding	YES	-
14:46669550	G	ENSCAFG00000003174	ENSCAFT00000005108	Transcript	missense_variant	1645	1200	400	Q/H	caA/caC	-	-	-1	DPY19L1	HGNC	HGNC:22205	protein_coding	YES	deleterious(0.01)
14:47612845	GC	ENSCAFG00000003227	ENSCAFT00000005183	Transcript	frameshift_variant,feature_elongation	564-565	362-363	121	-	-	-	-	1	EEPD1	HGNC	HGNC:22223	protein_coding	YES	-
14:47812167	T	ENSCAFG00000003243	ENSCAFT00000005209	Transcript	missense_variant	55	55	19	L/F	Ctt/Ttt	-	-	1	ANLN	HGNC	HGNC:14082	protein_coding	YES	deleterious(0)
14:5042129	T	ENSCAFG00000001362	ENSCAFT00000002128	Transcript	missense_variant	2743	2659	887	R/W	Cgg/Tgg	-	-	1	PLXNA4	HGNC	HGNC:9102	protein_coding	YES	deleterious(0.05)
14:5067683	A	ENSCAFG00000001362	ENSCAFT00000002128	Transcript	missense_variant	4333	4249	1417	E/K	Gag/Aag	-	-	1	PLXNA4	HGNC	HGNC:9102	protein_coding	YES	deleterious(0.01)
14:50925896	T	ENSCAFG00000003297	ENSCAFT00000005281	Transcript	stop_gained	19	19	7	R/*	Cga/Tga	-	-	1	LRRN3	HGNC	HGNC:17200	protein_coding	YES	-
14:50927252	A	ENSCAFG00000003297	ENSCAFT00000005281	Transcript	missense_variant	1375	1375	459	P/T	Cct/Act	-	-	1	LRRN3	HGNC	HGNC:17200	protein_coding	YES	deleterious(0)
14:50927675	A	ENSCAFG00000003297	ENSCAFT00000005281	Transcript	frameshift_variant,feature_elongation	1798-1799	1798-1799	600	-	-	-	-	1	LRRN3	HGNC	HGNC:17200	protein_coding	YES	-
14:51297412	A	ENSCAFG00000003299	ENSCAFT00000005282	Transcript	frameshift_variant,feature_elongation	543-544	60-61	20-21	-	-	-	-	-1	IMMP2L	HGNC	HGNC:14598	protein_coding	YES	-
14:51467115	A	ENSCAFG00000003307	ENSCAFT00000005304	Transcript	frameshift_variant,feature_elongation	4957-4958	4575-4576	1525-1526	-	-	-	-	-1	DOCK4	HGNC	HGNC:19192	protein_coding	YES	-
14:51485457	T	ENSCAFG00000003307	ENSCAFT00000005304	Transcript	missense_variant	4350	3968	1323	G/E	gGg/gAg	-	-	-1	DOCK4	HGNC	HGNC:19192	protein_coding	YES	deleterious(0)
14:51498115	A	ENSCAFG00000003307	ENSCAFT00000005304	Transcript	missense_variant	3993	3611	1204	H/L	cAc/cTc	-	-	-1	DOCK4	HGNC	HGNC:19192	protein_coding	YES	deleterious(0)
14:51948911	A	ENSCAFG00000003317	ENSCAFT00000005312	Transcript	missense_variant	851	775	259	D/N	Gac/Aac	-	-	1	ZNF277	HGNC	HGNC:13070	protein_coding	YES	deleterious(0)
14:51961810-51961814	-	ENSCAFG00000003317	ENSCAFT00000005312	Transcript	frameshift_variant,feature_truncation	1235-1238	1159-1162	387-388	-	-	-	-	1	ZNF277	HGNC	HGNC:13070	protein_coding	YES	-
14:52570061	T	ENSCAFG00000003337	ENSCAFT00000005336	Transcript	stop_gained	684	684	228	W/*	tgG/tgA	-	-	-1	GPR85	HGNC	HGNC:4536	protein_coding	YES	-
14:52570484	T	ENSCAFG00000003337	ENSCAFT00000005336	Transcript	stop_gained	261	261	87	W/*	tgG/tgA	-	-	-1	GPR85	HGNC	HGNC:4536	protein_coding	YES	-
14:54979500	T	ENSCAFG00000003397	ENSCAFT00000005451	Transcript	missense_variant	961	961	321	G/S	Ggt/Agt	-	-	-1	TFEC	HGNC	HGNC:11754	protein_coding	YES	deleterious(0.04)
14:55626954-55626955	-	ENSCAFG00000003406	ENSCAFT00000049462	Transcript	frameshift_variant,feature_truncation	1160	619	207	-	-	-	-	1	MET	Uniprot_gn	-	protein_coding	YES	-
14:56146913	T	ENSCAFG00000032267	ENSCAFT00000048659	Transcript	missense_variant	1453	718	240	G/R	Ggg/Agg	-	-	-1	WNT2	HGNC	HGNC:12780	protein_coding	YES	deleterious(0)
14:56540003	A	ENSCAFG00000003432	ENSCAFT00000005522	Transcript	missense_variant	3301	3301	1101	I/L	Ata/Tta	-	-	-1	CORTBP2	Uniprot_gn	-	protein_coding	YES	deleterious(0.01)
14:56586698	T	ENSCAFG00000003432	ENSCAFT00000005522	Transcript	missense_variant	583	583	195	E/K	Gag/Aag	-	-	-1	CORTBP2	Uniprot_gn	-	protein_coding	YES	deleterious(0.03)
14:58442211	T	ENSCAFG00000024216	ENSCAFT00000021890	Transcript	missense_variant	1015	895	299	R/C	Cgc/Tgc	-	-	1	-	-	-	protein_coding	YES	deleterious(0)
14:59067718-59067741	-	ENSCAFG00000003481	ENSCAFT00000005605	Transcript	frameshift_variant,feature_truncation	54-76	54-76	18-26	-	-	-	-	1	ING3	HGNC	HGNC:14587	protein_coding	YES	-
14:59088466	T	ENSCAFG00000003481	ENSCAFT00000005605	Transcript	missense_variant	1055	1055	352	D/V	gAt/gTt	-	-	1	ING3	HGNC	HGNC:14587	protein_coding	YES	deleterious(0)
14:59344635	A	ENSCAFG00000003492	ENSCAFT00000005616	Transcript	missense_variant	2601	2533	845	E/K	Gag/Aag	-	-	1	CPED1	HGNC	HGNC:26159	protein_coding	YES	deleterious(0.04)
14:59898735	T	ENSCAFG00000003510	ENSCAFT00000005646	Transcript	missense_variant	2568	2500	834	R/C	Cgt/Tgt	-	-	1	PTPRZ1	HGNC	HGNC:9685	protein_coding	YES	deleterious(0.02)
14:59927106	A	ENSCAFG00000003510	ENSCAFT00000005646	Transcript	missense_variant	5526	5458	1820	A/T	Gcc/Acc	-	-	1	PTPRZ1	HGNC	HGNC:9685	protein_coding	YES	deleterious(0)
14:59955662-59955665	-	ENSCAFG00000003532	ENSCAFT00000005673	Transcript	inframe_deletion	2199-2201	2199-2201	733-734	SR/R	agCAGg/agg	-	-	-1	AASS	HGNC	HGNC:17366	protein_coding	YES	-
14:60153656	T	ENSCAFG00000003553	ENSCAFT00000005713	Transcript	missense_variant	2800	2800	934	E/K	Gaa/Aaa	-	-	-1	CADPS2	HGNC	HGNC:16018	protein_coding	YES	deleterious(0.01)
14:60153661	A	ENSCAFG00000003553	ENSCAFT00000005713	Transcript	missense_variant	2795	2795	932	A/V	gCg/gTg	-	-	-1	CADPS2	HGNC	HGNC:16018	protein_coding	YES	deleterious(0.05)
14:60953561	G	ENSCAFG00000003584	ENSCAFT00000005760	Transcript	splice_donor_variant	-	-	-	-	-	-	-	-1	IQUB	HGNC	HGNC:21995	protein_coding	YES	-
14:60959758	A	ENSCAFG00000003584	ENSCAFT00000005760	Transcript	missense_variant	377	377	126	S/L	tCg/tTg	-	-	-1	IQUB	HGNC	HGNC:21995	protein_coding	YES	deleterious(0.02)
14:6290037	T	ENSCAFG00000024771	ENSCAFT00000038275	Transcript	missense_variant	875	875	292	S/L	tCg/tTg	-	-	1	KLF14	HGNC	HGNC:23025	protein_coding	YES	deleterious(0)
14:6382911	T	ENSCAFG00000001426	ENSCAFT00000002234	Transcript	missense_variant	1023	803	268	A/V	gCc/gTc	-	-	1	COPG2	HGNC	HGNC:2237	protein_coding	YES	deleterious(0)
14:640803	A	ENSCAFG00000001145	ENSCAFT00000001778	Transcript	stop_gained	363	363	121	W/*	tgG/tgA	-	-	1	TRIM11	HGNC	HGNC:16281	protein_coding	YES	-
14:6416774	A	ENSCAFG00000001426	ENSCAFT00000002234	Transcript	missense_variant	1967	1747	583	E/K	Gag/Aag	-	-	1	COPG2	HGNC	HGNC:2237	protein_coding	YES	deleterious(0.03)
14:6416811	A	ENSCAFG00000001426	ENSCAFT00000002234	Transcript	missense_variant	2004	1784	595	R/H	cGc/cAc	-	-	1	COPG2	HGNC	HGNC:2237	protein_coding	YES	deleterious(0.01)
14:6502686	G	ENSCAFG00000032717	ENSCAFT00000043670	Transcript	missense_variant	828	230	77	E/A	gAa/gCa	-	-	-1	-	-	-	protein_coding	YES	deleterious(0)
14:6600523	T	ENSCAFG00000001486	ENSCAFT00000002316	Transcript	missense_variant	250	250	84	V/I	Gtt/Att	-	-	-1	CPA5	HGNC	HGNC:15722	protein_coding	YES	deleterious(0.04)
14:6764335	T	ENSCAFG00000001497	ENSCAFT00000002333	Transcript	missense_variant	350	350	117	G/E	gGa/gAa	-	-	-1	KLHDC10	HGNC	HGNC:22194	protein_coding	YES	deleterious(0)
14:7123827	A	ENSCAFG00000001507	ENSCAFT00000002357	Transcript	missense_variant	1848	1082	361	A/V	gCc/gTc	-	-	-1	NRF1	HGNC	HGNC:7996	protein_coding	YES	deleterious(0.01)
14:7525504	A	ENSCAFG00000001531	ENSCAFT00000002391	Transcript	missense_variant	438	379	127	R/W	Cgg/Tgg	-	-	-1	SMO	HGNC	HGNC:11119	protein_coding	YES	deleterious(0)
14:7707234	A	ENSCAFG00000001543	ENSCAFT00000002409	Transcript	stop_gained	2336	2336	779	W/*	tGg/tAg	-	-	1	TNPO3	HGNC	HGNC:17103	protein_coding	YES	-
14:776182	T	ENSCAFG00000001161	ENSCAFT00000050108	Transcript	splice_acceptor_variant	-	-	-	-	-	-	-	-1	OBSCN	HGNC	HGNC:15719	protein_coding	YES	-
14:7775727	A	ENSCAFG00000001616	ENSCAFT00000002537	Transcript	missense_variant	4159	4159	1387	V/M	Gtg/Atg	-	-	1	KCP	HGNC	HGNC:17585	protein_coding	YES	deleterious(0)
14:7804122	A	ENSCAFG00000001585	ENSCAFT00000002504	Transcript	missense_variant	4075	4075	1359	P/S	Cca/Tca	-	-	-1	FLNC	HGNC	HGNC:3756	protein_coding	YES	deleterious(0.02)
14:7918712	A	ENSCAFG00000001644	ENSCAFT00000002583	Transcript	missense_variant	326	326	109	P/L	cCc/cTc	-	-	-1	FAM71F1	HGNC	HGNC:30704	protein_coding	YES	deleterious(0)
14:8010983	G	ENSCAFG00000001651	ENSCAFT00000002605	Transcript	missense_variant	1457	1457	486	D/G	gAt/gGt	-	-	1	IMPDH1	HGNC	HGNC:6052	protein_coding	YES	deleterious(0)
14:801138	T	ENSCAFG00000001167	ENSCAFT00000001809	Transcript	stop_gained	141	141	47	W/*	tgG/tgA	-	-	-1	IBA57	HGNC	HGNC:27302	protein_coding	YES	-
14:8118549	T	ENSCAFG00000001672	ENSCAFT00000002619	Transcript	missense_variant	817	592	198	D/N	Gac/Aac	-	-	-1	LEP	HGNC	HGNC:6553	protein_coding	YES	deleterious(0)
14:822518	T	ENSCAFG00000001174	ENSCAFT00000001816	Transcript	missense_variant	696	71	24	G/E	gGa/gAa	-	-	-1	GUK1	HGNC	HGNC:4693	protein_coding	YES	deleterious(0.01)
14:8416708	T	ENSCAFG00000001700	ENSCAFT00000002687	Transcript	missense_variant	1931	1616	539	R/H	cGt/cAt	-	-	-1	SND1	HGNC	HGNC:30646	protein_coding	YES	deleterious(0)
14:8440392	T	ENSCAFG00000001700	ENSCAFT00000002687	Transcript	missense_variant	1823	1508	503	R/H	cGt/cAt	-	-	-1	SND1	HGNC	HGNC:30646	protein_coding	YES	deleterious(0.04)
14:8640121	A	ENSCAFG00000001700	ENSCAFT00000002687	Transcript	stop_gained	1009	694	232	R/*	Cga/Tga	-	-	-1	SND1	HGNC	HGNC:30646	protein_coding	YES	-
14:864848	T	ENSCAFG00000001179	ENSCAFT00000001825	Transcript	missense_variant	597	449	150	C/Y	tGc/tAc	-	-	-1	WNT3A	HGNC	HGNC:15983	protein_coding	YES	deleterious(0)
14:8716974	T	ENSCAFG00000001719	ENSCAFT00000002692	Transcript	missense_variant	473	473	158	G/V	gGc/gTc	-	-	1	PAX4	HGNC	HGNC:8618	protein_coding	YES	deleterious(0.02)
14:8730596	T	ENSCAFG00000001721	ENSCAFT00000002697	Transcript	missense_variant	134	134	45	R/Q	cGg/cAg	-	-	-1	FSCN3	HGNC	HGNC:3961	protein_coding	YES	deleterious(0.01)
14:8740793	A	ENSCAFG00000001730	ENSCAFT00000002710	Transcript	missense_variant	1099	1099	367	E/K	Gag/Aag	-	-	1	GCC1	HGNC	HGNC:19095	protein_coding	YES	deleterious(0)
14:8741384	T	ENSCAFG00000001730	ENSCAFT00000002710	Transcript	missense_variant	1690	1690	564	R/W	Cgg/Tgg	-	-	1	GCC1	HGNC	HGNC:19095	protein_coding	YES	deleterious(0)
14:9318638	T	ENSCAFG00000001738	ENSCAFT00000002730	Transcript	stop_gained	1070	754	252	K/*	Aaa/Taa	-	-	1	GRM8	HGNC	HGNC:4600	protein_coding	YES	-
14:9319290	A	ENSCAFG00000001738	ENSCAFT00000002730	Transcript	stop_gained	1249	933	311	W/*	tgG/tgA	-	-	1	GRM8	HGNC	HGNC:4600	protein_coding	YES	-
14:9713262	T	ENSCAFG00000001738	ENSCAFT00000002730	Transcript	missense_variant	2834	2518	840	I/F	Att/Ttt	-	-	1	GRM8	HGNC	HGNC:4600	protein_coding	YES	deleterious(0)
14:9713422	A	ENSCAFG00000001738	ENSCAFT00000002730	Transcript	splice_donor_variant	-	-	-	-	-	-	-	1	GRM8	HGNC	HGNC:4600	protein_coding	YES	-
15:10937118	G	ENSCAFG00000003927	ENSCAFT00000006315	Transcript	missense_variant	184	184	62	T/P	Acc/Ccc	-	-	-1	ELAVL4	HGNC	HGNC:3315	protein_coding	YES	deleterious(0)
15:12213947	G	ENSCAFG00000003935	ENSCAFT00000006327	Transcript	missense_variant	50	50	17	D/G	gAc/gGc	-	-	1	BEND5	HGNC	HGNC:25668	protein_coding	YES	deleterious(0.01)
15:12216441	T	ENSCAFG00000003935	ENSCAFT00000006327	Transcript	missense_variant	409	409	137	L/F	Ctc/Ttc	-	-	1	BEND5	HGNC	HGNC:25668	protein_coding	YES	deleterious(0.02)
15:12523221	T	ENSCAFG00000003941	ENSCAFT00000006335	Transcript	missense_variant	617	370	124	R/C	Cgc/Tgc	-	-	1	SPATA6	HGNC	HGNC:18309	protein_coding	YES	deleterious(0)
15:12523235	T	ENSCAFG00000003941	ENSCAFT00000006335	Transcript	missense_variant	631	384	128	M/I	atG/atT	-	-	1	SPATA6	HGNC	HGNC:18309	protein_coding	YES	deleterious(0)
15:12608544	A	ENSCAFG00000003941	ENSCAFT00000006335	Transcript	missense_variant	1597	1350	450	M/I	atG/atA	-	-	1	SPATA6	HGNC	HGNC:18309	protein_coding	YES	deleterious(0.03)
15:13536325	T	ENSCAFG00000023824	ENSCAFT00000006579	Transcript	missense_variant	410	410	137	R/H	cGc/cAc	-	-	-1	CYP4X1	HGNC	HGNC:20244	protein_coding	YES	deleterious(0)
15:13677716	A	ENSCAFG00000004097	ENSCAFT00000006586	Transcript	missense_variant	1387	1319	440	P/L	cCc/cTc	-	-	-1	CYP4B1	HGNC	HGNC:2644	protein_coding	YES	deleterious(0.03)
15:13684474	A	ENSCAFG00000004097	ENSCAFT00000006586	Transcript	missense_variant,splice_region_variant	393	325	109	P/S	Ccg/Tcg	-	-	-1	CYP4B1	HGNC	HGNC:2644	protein_coding	YES	deleterious(0)
15:13694418	A	ENSCAFG00000004097	ENSCAFT00000006586	Transcript	missense_variant	76	8	3	S/F	tCt/tTt	-	-	-1	CYP4B1	HGNC	HGNC:2644	protein_coding	YES	deleterious(0.04)
15:13849412	C	ENSCAFG00000004221	ENSCAFT00000038895	Transcript	frameshift_variant,feature_elongation	279-280	279-280	93-94	-	-	-	-	1	MOB3C	HGNC	HGNC:29800	protein_coding	YES	-
15:13885051	A	ENSCAFG00000004205	ENSCAFT00000006753	Transcript	missense_variant	574	574	192	D/N	Gac/Aac	-	-	1	-	-	-	protein_coding	YES	deleterious(0.04)
15:14003863	A	ENSCAFG00000004242	ENSCAFT00000006818	Transcript	missense_variant	481	226	76	V/L	Gtg/Ttg	-	-	-1	-	-	-	protein_coding	YES	deleterious(0.04)
15:14109186	T	ENSCAFG00000004263	ENSCAFT00000006845	Transcript	missense_variant	1865	1865	622	S/F	tCt/tTt	-	-	1	LRRC41	HGNC	HGNC:16917	protein_coding	YES	deleterious(0.01)
15:14362012	G	ENSCAFG00000004390	ENSCAFT00000007093	Transcript	missense_variant	4669	4669	1557	G/R	Ggc/Cgc	-	-	-1	MAST2	HGNC	HGNC:19035	protein_coding	YES	deleterious(0.01)
15:14363436	T	ENSCAFG00000004390	ENSCAFT00000007093	Transcript	missense_variant	3617	3617	1206	R/Q	cGg/cAg	-	-	-1	MAST2	HGNC	HGNC:19035	protein_coding	YES	deleterious(0.01)
15:14381071	C	ENSCAFG00000004390	ENSCAFT00000007093	Transcript	missense_variant	1088	1088	363	H/R	cAt/cGt	-	-	-1	MAST2	HGNC	HGNC:19035	protein_coding	YES	deleterious(0.02)
15:15015144	A	ENSCAFG00000004603	ENSCAFT00000007420	Transcript	missense_variant	1487	1487	496	S/F	tCc/tTc	-	-	-1	TOE1	HGNC	HGNC:15954	protein_coding	YES	deleterious(0)
15:15028471	T	ENSCAFG00000004619	ENSCAFT00000007440	Transcript	stop_gained	201	201	67	Y/*	taC/taA	-	-	-1	HPDL	HGNC	HGNC:28242	protein_coding	YES	-
15:15243260	A	ENSCAFG00000023971	ENSCAFT00000037120	Transcript	missense_variant	475	475	159	E/K	Gag/Aag	-	-	1	ZSWIM5	HGNC	HGNC:29299	protein_coding	YES	deleterious(0.01)
15:15316130	T	ENSCAFG00000004646	ENSCAFT00000007496	Transcript	missense_variant	260	179	60	R/H	cGc/cAc	-	-	-1	UROD	HGNC	HGNC:12591	protein_coding	YES	deleterious(0.01)
15:15497256	A	ENSCAFG00000004694	ENSCAFT00000007564	Transcript	missense_variant	971	971	324	S/N	aGt/aAt	-	-	1	PTCH2	HGNC	HGNC:9586	protein_coding	YES	deleterious(0.04)
15:15518562-15518563	-	ENSCAFG00000004701	ENSCAFT00000007567	Transcript	frameshift_variant,feature_truncation	195	195	65	-	-	-	-	1	TCTEX1D4	HGNC	HGNC:32315	protein_coding	YES	-
15:15519403-15519409	-	ENSCAFG00000004713	ENSCAFT00000007621	Transcript	inframe_deletion	2056-2061	1892-1897	631-633	QRL/L	cAGCGGCtc/ctc	-	-	-1	PLK3	HGNC	HGNC:2154	protein_coding	YES	-
15:15519417-15519418	-	ENSCAFG00000004713	ENSCAFT00000007621	Transcript	frameshift_variant,feature_truncation	2047	1883	628	-	-	-	-	-1	PLK3	HGNC	HGNC:2154	protein_coding	YES	-
15:16079179	T	ENSCAFG00000004811	ENSCAFT00000007758	Transcript	missense_variant	559	514	172	V/M	Gtg/Atg	-	-	-1	DMAP1	HGNC	HGNC:18291	protein_coding	YES	deleterious(0.05)
15:16148870	A	ENSCAFG00000004819	ENSCAFT00000007761	Transcript	missense_variant	1374	1169	390	A/V	gCt/gTt	-	-	-1	KLF17	HGNC	HGNC:18830	protein_coding	YES	deleterious(0.03)
15:16279866	T	ENSCAFG00000004833	ENSCAFT00000007799	Transcript	missense_variant	85	85	29	G/R	Ggg/Agg	-	-	-1	B4GALT2	HGNC	HGNC:925	protein_coding	YES	deleterious(0.01)
15:16303189	G	ENSCAFG00000004875	ENSCAFT00000007856	Transcript	missense_variant	1652	1652	551	L/P	cTc/cCc	-	-	-1	IPO13	HGNC	HGNC:16853	protein_coding	YES	deleterious(0)
15:16319178	T	ENSCAFG00000030277	ENSCAFT00000048557	Transcript	missense_variant	106	106	36	V/I	Gtc/Atc	-	-	-1	ARTN	HGNC	HGNC:727	protein_coding	YES	deleterious(0.01)
15:16346945	T	ENSCAFG00000004887	ENSCAFT00000007860	Transcript	missense_variant	8	8	3	R/Q	cGg/cAg	-	-	-1	ST3GAL3	HGNC	HGNC:10866	protein_coding	YES	deleterious(0.05)
15:16631945	A	ENSCAFG00000005069	ENSCAFT00000008255	Transcript	missense_variant	589	589	197	S/C	Agt/Tgt	-	-	-1	PTPRF	HGNC	HGNC:9670	protein_coding	YES	deleterious(0)
15:16756656	A	ENSCAFG00000005220	ENSCAFT00000044106	Transcript	missense_variant	1993	1993	665	R/C	Cgc/Tgc	-	-	-1	SZT2	HGNC	HGNC:29040	protein_coding	YES	deleterious(0)
15:16816336	A	ENSCAFG00000023766	ENSCAFT00000036754	Transcript	missense_variant	1232	1232	411	W/L	tGg/tTg	-	-	-1	MPL	HGNC	HGNC:7217	protein_coding	YES	deleterious(0)
15:17248247	A	ENSCAFG00000030818	ENSCAFT00000038257	Transcript	missense_variant	815	815	272	S/F	tCc/tTc	-	-	-1	-	-	-	protein_coding	YES	deleterious(0)
15:17720827	A	ENSCAFG00000005404	ENSCAFT00000008693	Transcript	missense_variant	6848	6824	2275	S/F	tCc/tTc	-	-	-1	TEP1	HGNC	HGNC:11726	protein_coding	YES	deleterious(0)
15:17735686	A	ENSCAFG00000005404	ENSCAFT00000008693	Transcript	missense_variant,splice_region_variant	2050	2026	676	P/S	Ccc/Tcc	-	-	-1	TEP1	HGNC	HGNC:11726	protein_coding	YES	deleterious(0.02)
15:18120028	A	ENSCAFG00000005474	ENSCAFT00000008814	Transcript	missense_variant	55	55	19	G/R	Gga/Aga	-	-	1	TPPP2	HGNC	HGNC:19293	protein_coding	YES	deleterious(0)
15:18121291	G	ENSCAFG00000005474	ENSCAFT00000008814	Transcript	frameshift_variant,feature_elongation	359-360	359-360	120	-	-	-	-	1	TPPP2	HGNC	HGNC:19293	protein_coding	YES	-
15:18121305	T	ENSCAFG00000005474	ENSCAFT00000008814	Transcript	missense_variant	373	373	125	R/W	Cgg/Tgg	-	-	1	TPPP2	HGNC	HGNC:19293	protein_coding	YES	deleterious(0.01)
15:18180123-18180129	-	ENSCAFG00000005493	ENSCAFT00000008859	Transcript	inframe_deletion	1284-1289	1284-1289	428-430	GRG/G	ggCCGCGGa/gga	-	-	-1	ZNF219	HGNC	HGNC:13011	protein_coding	YES	-
15:18371479	A	ENSCAFG00000005511	ENSCAFT00000008883	Transcript	missense_variant	3219	3023	1008	P/H	cCt/cAt	-	-	1	RPGRIP1	Uniprot_gn	-	protein_coding	YES	deleterious(0.03)
15:18447124	T	ENSCAFG00000005626	ENSCAFT00000009065	Transcript	missense_variant	3638	3638	1213	G/D	gGt/gAt	-	-	-1	CHD8	HGNC	HGNC:20153	protein_coding	YES	deleterious(0)
15:18447155	A	ENSCAFG00000005626	ENSCAFT00000009065	Transcript	missense_variant	3607	3607	1203	R/C	Cgc/Tgc	-	-	-1	CHD8	HGNC	HGNC:20153	protein_coding	YES	deleterious(0)
15:18534404	A	ENSCAFG00000005657	ENSCAFT00000009106	Transcript	stop_gained	106	106	36	R/*	Cga/Tga	-	-	-1	METTL3	HGNC	HGNC:17563	protein_coding	YES	-
15:18559530	A	ENSCAFG00000005676	ENSCAFT00000009143	Transcript	missense_variant	1642	1642	548	R/C	Cgc/Tgc	-	-	-1	SALL2	HGNC	HGNC:10526	protein_coding	YES	deleterious(0)
15:19333348	G	ENSCAFG00000031800	ENSCAFT00000044818	Transcript	missense_variant	868	868	290	G/R	Ggc/Cgc	-	-	-1	BBS10	HGNC	HGNC:26291	protein_coding	YES	deleterious(0)
15:1956237	T	ENSCAFG00000002592	ENSCAFT00000004088	Transcript	stop_gained	199	199	67	Q/*	Cag/Tag	-	-	1	SCMH1	HGNC	HGNC:19003	protein_coding	YES	-
15:19682564	A	ENSCAFG00000005712	ENSCAFT00000009212	Transcript	missense_variant	259	259	87	D/N	Gat/Aat	-	-	1	ZDHHC17	HGNC	HGNC:18412	protein_coding	YES	deleterious(0.04)
15:2017282	A	ENSCAFG00000002592	ENSCAFT00000004088	Transcript	missense_variant,splice_region_variant	1075	1075	359	V/I	Gtt/Att	-	-	1	SCMH1	HGNC	HGNC:19003	protein_coding	YES	deleterious(0.01)
15:20747465	CC	ENSCAFG00000005746	ENSCAFT00000009280	Transcript	frameshift_variant,feature_elongation	1193-1194	1193-1194	398	-	-	-	-	1	NAV3	HGNC	HGNC:15998	protein_coding	YES	-
15:20846173	T	ENSCAFG00000005746	ENSCAFT00000009280	Transcript	missense_variant	3389	3389	1130	P/L	cCc/cTc	-	-	1	NAV3	HGNC	HGNC:15998	protein_coding	YES	deleterious(0)
15:20881742	A	ENSCAFG00000005746	ENSCAFT00000009280	Transcript	missense_variant	4808	4808	1603	R/Q	cGg/cAg	-	-	1	NAV3	HGNC	HGNC:15998	protein_coding	YES	deleterious(0)
15:21432786-21432787	-	ENSCAFG00000005762	ENSCAFT00000009290	Transcript	frameshift_variant,feature_truncation	124	124	42	-	-	-	-	-1	-	-	-	protein_coding	YES	-
15:21901962	T	ENSCAFG00000005766	ENSCAFT00000009301	Transcript	missense_variant	781	781	261	R/C	Cgc/Tgc	-	-	1	SYT1	HGNC	HGNC:11509	protein_coding	YES	deleterious(0)
15:22039742	A	ENSCAFG00000005766	ENSCAFT00000009301	Transcript	missense_variant	1123	1123	375	G/S	Ggc/Agc	-	-	1	SYT1	HGNC	HGNC:11509	protein_coding	YES	deleterious(0)
15:22302923	A	ENSCAFG00000005779	ENSCAFT00000009326	Transcript	missense_variant	2140	2140	714	R/C	Cgt/Tgt	-	-	-1	PPP1R12A	HGNC	HGNC:7618	protein_coding	YES	deleterious(0)
15:22338893	A	ENSCAFG00000005779	ENSCAFT00000009326	Transcript	missense_variant	610	610	204	H/Y	Cat/Tat	-	-	-1	PPP1R12A	HGNC	HGNC:7618	protein_coding	YES	deleterious(0)
15:22975757	G	ENSCAFG00000005801	ENSCAFT00000009346	Transcript	splice_acceptor_variant	-	-	-	-	-	-	-	1	PTPRQ	HGNC	HGNC:9679	protein_coding	YES	-
15:23002108	A	ENSCAFG00000005801	ENSCAFT00000009346	Transcript	missense_variant,splice_region_variant	6296	6296	2099	G/E	gGa/gAa	-	-	1	PTPRQ	HGNC	HGNC:9679	protein_coding	YES	deleterious(0)
15:23051087	T	ENSCAFG00000005808	ENSCAFT00000009368	Transcript	missense_variant	743	743	248	S/F	tCc/tTc	-	-	1	MYF5	HGNC	HGNC:7565	protein_coding	YES	deleterious(0.03)
15:23140127	T	ENSCAFG00000005817	ENSCAFT00000009373	Transcript	missense_variant	374	374	125	G/E	gGa/gAa	-	-	-1	LIN7A	HGNC	HGNC:17787	protein_coding	YES	deleterious(0)
15:23489670	T	ENSCAFG00000005854	ENSCAFT00000009520	Transcript	missense_variant	3940	3406	1136	E/K	Gag/Aag	-	-	-1	PPFIA2	HGNC	HGNC:9246	protein_coding	YES	deleterious(0.02)
15:23490721	A	ENSCAFG00000005854	ENSCAFT00000009520	Transcript	stop_gained	3907	3373	1125	Q/*	Cag/Tag	-	-	-1	PPFIA2	HGNC	HGNC:9246	protein_coding	YES	-
15:23502274	T	ENSCAFG00000005854	ENSCAFT00000009520	Transcript	stop_gained	3503	2969	990	W/*	tGg/tAg	-	-	-1	PPFIA2	HGNC	HGNC:9246	protein_coding	YES	-
15:2381755	A	ENSCAFG00000002830	ENSCAFT00000004521	Transcript	missense_variant	710	257	86	S/N	aGc/aAc	-	-	1	RIMS3	HGNC	HGNC:21292	protein_coding	YES	deleterious(0)
15:24874301	A	ENSCAFG00000005914	ENSCAFT00000009546	Transcript	missense_variant	2388	1745	582	R/H	cGc/cAc	-	-	1	TMTC2	HGNC	HGNC:25440	protein_coding	YES	deleterious(0.03)
15:258271	A	ENSCAFG00000002485	ENSCAFT00000003921	Transcript	missense_variant	394	394	132	P/S	Ccc/Tcc	-	-	-1	OR18D12	Uniprot_gn	-	protein_coding	YES	deleterious(0)
15:26487884	T	ENSCAFG00000005946	ENSCAFT00000009614	Transcript	missense_variant	2589	2132	711	G/E	gGa/gAa	-	-	-1	SLC6A15	HGNC	HGNC:13621	protein_coding	YES	deleterious(0.01)
15:2659492-2659515	-	ENSCAFG00000002997	ENSCAFT00000047994	Transcript	frameshift_variant,feature_truncation	1552-1574	1552-1574	518-525	-	-	-	-	1	COL9A2	EntrezGene	-	protein_coding	YES	-
15:26626412	C	ENSCAFG00000028967	ENSCAFT00000044438	Transcript	missense_variant	569	290	97	L/S	tTa/tCa	-	-	1	LRRIQ1	HGNC	HGNC:25708	protein_coding	YES	deleterious(0.04)
15:26628013	A	ENSCAFG00000028967	ENSCAFT00000044438	Transcript	missense_variant	698	419	140	P/H	cCt/cAt	-	-	1	LRRIQ1	HGNC	HGNC:25708	protein_coding	YES	deleterious(0.03)
15:26841198	T	ENSCAFG00000005972	ENSCAFT00000009642	Transcript	missense_variant	449	299	100	A/V	gCc/gTc	-	-	1	ALX1	HGNC	HGNC:1494	protein_coding	YES	deleterious(0.01)
15:26858260	T	ENSCAFG00000005972	ENSCAFT00000009642	Transcript	missense_variant	692	542	181	S/L	tCg/tTg	-	-	1	ALX1	HGNC	HGNC:1494	protein_coding	YES	deleterious(0.03)
15:27462973-27462975	-	ENSCAFG00000005977	ENSCAFT00000009653	Transcript	frameshift_variant,feature_truncation	1296-1297	995-996	332	-	-	-	-	-1	MGAT4C	HGNC	HGNC:30871	protein_coding	YES	-
15:29206278	T	ENSCAFG00000006027	ENSCAFT00000009731	Transcript	missense_variant	6404	6404	2135	T/N	aCc/aAc	-	-	-1	CEP290	HGNC	HGNC:29021	protein_coding	YES	deleterious(0)
15:29330256	G	ENSCAFG00000006060	ENSCAFT00000009836	Transcript	missense_variant	2247	1437	479	D/E	gaT/gaG	-	-	1	TMTC3	HGNC	HGNC:26899	protein_coding	YES	deleterious(0.01)
15:29336455	G	ENSCAFG00000006060	ENSCAFT00000009836	Transcript	missense_variant	2992	2182	728	L/V	Tta/Gta	-	-	1	TMTC3	HGNC	HGNC:26899	protein_coding	YES	deleterious(0)
15:3012230	T	ENSCAFG00000003022	ENSCAFT00000004860	Transcript	missense_variant	1031	1031	344	S/F	tCc/tTc	-	-	1	MYCL	HGNC	HGNC:7555	protein_coding	YES	deleterious(0.02)
15:31671424	T	ENSCAFG00000006129	ENSCAFT00000009916	Transcript	missense_variant	1164	929	310	C/Y	tGc/tAc	-	-	-1	EPYC	HGNC	HGNC:3053	protein_coding	YES	deleterious(0)
15:31756163	A	ENSCAFG00000006134	ENSCAFT00000009924	Transcript	missense_variant	1129	599	200	A/V	gCc/gTc	-	-	-1	KERA	HGNC	HGNC:6309	protein_coding	YES	deleterious(0.01)
15:32061824	C	ENSCAFG00000006152	ENSCAFT00000009953	Transcript	missense_variant	272	272	91	E/G	gAa/gGa	-	-	-1	-	-	-	protein_coding	YES	deleterious(0.04)
15:33150706	T	ENSCAFG00000006163	ENSCAFT00000009971	Transcript	missense_variant	3844	3844	1282	E/K	Gaa/Aaa	-	-	-1	EEA1	HGNC	HGNC:3185	protein_coding	YES	deleterious(0.01)
15:33879037	C	ENSCAFG00000031691	ENSCAFT00000045587	Transcript	missense_variant	270	38	13	R/P	cGc/cCc	-	-	1	CRADD	HGNC	HGNC:2340	protein_coding	YES	deleterious(0)
15:34372356	A	ENSCAFG00000006200	ENSCAFT00000042860	Transcript	missense_variant	989	989	330	R/Q	cGg/cAg	-	-	1	PLXNC1	HGNC	HGNC:9106	protein_coding	YES	deleterious(0)
15:34410127	A	ENSCAFG00000006200	ENSCAFT00000042860	Transcript	missense_variant	2392	2392	798	E/K	Gag/Aag	-	-	1	PLXNC1	HGNC	HGNC:9106	protein_coding	YES	deleterious(0.01)
15:34637998	A	ENSCAFG00000006227	ENSCAFT00000010061	Transcript	missense_variant	577	577	193	R/W	Cgg/Tgg	-	-	-1	TMCC3	Uniprot_gn	-	protein_coding	YES	deleterious(0.03)
15:35215139	A	ENSCAFG00000006331	ENSCAFT00000010240	Transcript	missense_variant	1279	1279	427	V/I	Gtt/Att	-	-	1	VEZT	HGNC	HGNC:18258	protein_coding	YES	deleterious(0.03)
15:35413120	G	ENSCAFG00000006375	ENSCAFT00000010298	Transcript	missense_variant	1072	1072	358	G/R	Gga/Cga	-	-	-1	USP44	HGNC	HGNC:20064	protein_coding	YES	deleterious(0.01)
15:35711022	A	ENSCAFG00000023384	ENSCAFT00000035916	Transcript	missense_variant	1247	1247	416	S/F	tCc/tTc	-	-	-1	CCDC38	HGNC	HGNC:26843	protein_coding	YES	deleterious(0)
15:36052572-36052574	-	ENSCAFG00000006459	ENSCAFT00000010442	Transcript	frameshift_variant,feature_truncation	1374-1375	635-636	212	-	-	-	-	-1	CDK17	HGNC	HGNC:8750	protein_coding	YES	-
15:38715699	A	ENSCAFG00000006596	ENSCAFT00000010724	Transcript	missense_variant	1747	1699	567	P/S	Cca/Tca	-	-	-1	ANKS1B	HGNC	HGNC:24600	protein_coding	YES	deleterious(0.02)
15:38781305	T	ENSCAFG00000006596	ENSCAFT00000010724	Transcript	frameshift_variant,feature_elongation	1444-1445	1396-1397	466	-	-	-	-	-1	ANKS1B	HGNC	HGNC:24600	protein_coding	YES	-
15:38781306	T	ENSCAFG00000006596	ENSCAFT00000010724	Transcript	missense_variant	1444	1396	466	P/T	Cct/Act	-	-	-1	ANKS1B	HGNC	HGNC:24600	protein_coding	YES	deleterious(0)
15:39318243	T	ENSCAFG00000006719	ENSCAFT00000010817	Transcript	missense_variant	311	146	49	P/L	cCg/cTg	-	-	1	ACTR6	HGNC	HGNC:24025	protein_coding	YES	deleterious(0)
15:39338847-39338851	-	ENSCAFG00000006719	ENSCAFT00000010817	Transcript	splice_donor_variant,coding_sequence_variant,feature_truncation	1432-?	1267-?	423-?	-	-	-	-	1	ACTR6	HGNC	HGNC:24025	protein_coding	YES	-
15:39469568	T	ENSCAFG00000006786	ENSCAFT00000010950	Transcript	missense_variant	632	632	211	S/L	tCa/tTa	-	-	1	SLC17A8	HGNC	HGNC:20151	protein_coding	YES	deleterious(0)
15:39641478	T	ENSCAFG00000006883	ENSCAFT00000044125	Transcript	missense_variant	79	79	27	P/S	Cca/Tca	-	-	1	GAS2L3	HGNC	HGNC:27475	protein_coding	YES	deleterious(0)
15:39656813	T	ENSCAFG00000006883	ENSCAFT00000044125	Transcript	missense_variant	1225	1225	409	R/W	Cgg/Tgg	-	-	1	GAS2L3	HGNC	HGNC:27475	protein_coding	YES	deleterious(0.01)
15:40195727	T	ENSCAFG00000006942	ENSCAFT00000011147	Transcript	missense_variant	1273	1273	425	P/T	Cca/Aca	-	-	-1	SLC5A8	HGNC	HGNC:19119	protein_coding	YES	deleterious(0)
15:40391948	A	ENSCAFG00000006992	ENSCAFT00000011221	Transcript	missense_variant	398	398	133	A/V	gCc/gTc	-	-	-1	ARL1	HGNC	HGNC:692	protein_coding	YES	deleterious(0.01)
15:40550575	T	ENSCAFG00000007134	ENSCAFT00000011524	Transcript	stop_gained	967	967	323	R/*	Cga/Tga	-	-	1	MYBPC1	HGNC	HGNC:7549	protein_coding	YES	-
15:40552272	C	ENSCAFG00000007134	ENSCAFT00000011524	Transcript	missense_variant	1099	1099	367	V/L	Gtg/Ctg	-	-	1	MYBPC1	HGNC	HGNC:7549	protein_coding	YES	deleterious(0)
15:40778194	T	ENSCAFG00000007257	ENSCAFT00000011632	Transcript	stop_gained	1258	247	83	Q/*	Caa/Taa	-	-	1	DRAM1	HGNC	HGNC:25645	protein_coding	YES	-
15:42521765	A	ENSCAFG00000007456	ENSCAFT00000011954	Transcript	missense_variant	1288	845	282	S/F	tCc/tTc	-	-	-1	GLT8D2	HGNC	HGNC:24890	protein_coding	YES	deleterious(0)
15:42589866	A	ENSCAFG00000007476	ENSCAFT00000011972	Transcript	frameshift_variant,feature_elongation	1806-1807	1806-1807	602-603	-	-	-	-	1	HCFC2	HGNC	HGNC:24972	protein_coding	YES	-
15:43805820	A	ENSCAFG00000007597	ENSCAFT00000012170	Transcript	missense_variant,splice_region_variant	1144	1144	382	A/T	Gca/Aca	-	-	1	ABCE1	HGNC	HGNC:69	protein_coding	YES	deleterious(0.02)
15:44437335	A	ENSCAFG00000007698	ENSCAFT00000012329	Transcript	missense_variant	719	719	240	S/F	tCc/tTc	-	-	-1	ZNF827	HGNC	HGNC:27193	protein_coding	YES	deleterious(0)
15:44950439	T	ENSCAFG00000007747	ENSCAFT00000012383	Transcript	missense_variant,splice_region_variant	889	101	34	G/E	gGa/gAa	-	-	-1	SLC10A7	HGNC	HGNC:23088	protein_coding	YES	deleterious(0)
15:45031160	A	ENSCAFG00000007756	ENSCAFT00000012393	Transcript	missense_variant	67	67	23	E/K	Gag/Aag	-	-	1	POU4F2	HGNC	HGNC:9219	protein_coding	YES	deleterious(0)
15:46212899	A	ENSCAFG00000007789	ENSCAFT00000012463	Transcript	missense_variant,splice_region_variant	1034	1034	345	R/Q	cGg/cAg	-	-	1	ARHGAP10	HGNC	HGNC:26099	protein_coding	YES	deleterious(0)
15:46239189	C	ENSCAFG00000007789	ENSCAFT00000012463	Transcript	missense_variant	1220	1220	407	E/A	gAa/gCa	-	-	1	ARHGAP10	HGNC	HGNC:26099	protein_coding	YES	deleterious(0)
15:46284191	C	ENSCAFG00000007789	ENSCAFT00000012463	Transcript	missense_variant	1538	1538	513	L/S	tTg/tCg	-	-	1	ARHGAP10	HGNC	HGNC:26099	protein_coding	YES	deleterious(0)
15:46330957	C	ENSCAFG00000007789	ENSCAFT00000012463	Transcript	frameshift_variant,feature_elongation	1757-1758	1757-1758	586	-	-	-	-	1	ARHGAP10	HGNC	HGNC:26099	protein_coding	YES	-
15:46422964	A	ENSCAFG00000007813	ENSCAFT00000012489	Transcript	missense_variant	2638	2636	879	A/V	gCt/gTt	-	-	-1	NR3C2	HGNC	HGNC:7979	protein_coding	YES	deleterious(0.02)
15:46551907	C	ENSCAFG00000007813	ENSCAFT00000012489	Transcript	missense_variant,splice_region_variant	1888	1886	629	E/G	gAa/gGa	-	-	-1	NR3C2	HGNC	HGNC:7979	protein_coding	YES	deleterious(0)
15:46552033	T	ENSCAFG00000007813	ENSCAFT00000012489	Transcript	missense_variant	1762	1760	587	R/Q	cGa/cAa	-	-	-1	NR3C2	HGNC	HGNC:7979	protein_coding	YES	deleterious(0.01)
15:4663660	A	ENSCAFG00000003236	ENSCAFT00000005195	Transcript	missense_variant	898	898	300	D/N	Gac/Aac	-	-	1	INPP5B	HGNC	HGNC:6077	protein_coding	YES	deleterious(0)
15:47814818	A	ENSCAFG00000007842	ENSCAFT00000012516	Transcript	missense_variant	704	251	84	P/L	cCc/cTc	-	-	-1	-	-	-	protein_coding	YES	deleterious(0.01)
15:48254247	A	ENSCAFG00000007870	ENSCAFT00000012560	Transcript	missense_variant	2069	1717	573	D/N	Gac/Aac	-	-	1	DCLK2	HGNC	HGNC:19002	protein_coding	YES	deleterious(0)
15:48814849	A	ENSCAFG00000007907	ENSCAFT00000012691	Transcript	missense_variant	3872	3872	1291	S/F	tCt/tTt	-	-	-1	LRBA	HGNC	HGNC:1742	protein_coding	YES	deleterious(0)
15:48816026	T	ENSCAFG00000007907	ENSCAFT00000012691	Transcript	missense_variant	3737	3737	1246	R/H	cGt/cAt	-	-	-1	LRBA	HGNC	HGNC:1742	protein_coding	YES	deleterious(0.01)
15:48817856-48817860	-	ENSCAFG00000007907	ENSCAFT00000012691	Transcript	frameshift_variant,feature_truncation	2919-2922	2919-2922	973-974	-	-	-	-	-1	LRBA	HGNC	HGNC:1742	protein_coding	YES	-
15:48841715	T	ENSCAFG00000007907	ENSCAFT00000012691	Transcript	stop_gained	2520	2520	840	W/*	tgG/tgA	-	-	-1	LRBA	HGNC	HGNC:1742	protein_coding	YES	-
15:489549-489552	-	ENSCAFG00000002500	ENSCAFT00000023821	Transcript	inframe_deletion	1026-1028	761-763	254-255	EK/E	gAGAag/gag	-	-	1	SLC2A1	Uniprot_gn	-	protein_coding	-	-
15:489549-489552	-	ENSCAFG00000002500	ENSCAFT00000003950	Transcript	inframe_deletion	797-799	797-799	266-267	EK/E	gAGAag/gag	-	-	1	SLC2A1	Uniprot_gn	-	protein_coding	YES	-
15:489920	A	ENSCAFG00000002500	ENSCAFT00000003950	Transcript	missense_variant	970	970	324	G/S	Ggc/Agc	-	-	1	SLC2A1	Uniprot_gn	-	protein_coding	YES	deleterious(0.01)
15:49223550	T	ENSCAFG00000023141	ENSCAFT00000012838	Transcript	missense_variant	202	202	68	H/Y	Cac/Tac	-	-	1	-	-	-	protein_coding	YES	deleterious(0.03)
15:49583987	T	ENSCAFG00000008071	ENSCAFT00000047725	Transcript	missense_variant	1529	1529	510	A/V	gCc/gTc	-	-	1	FAM160A1	HGNC	HGNC:34237	protein_coding	YES	deleterious(0)
15:50513496	A	ENSCAFG00000008164	ENSCAFT00000036176	Transcript	missense_variant	170	170	57	A/V	gCg/gTg	-	-	-1	TMEM154	HGNC	HGNC:26489	protein_coding	YES	deleterious(0.01)
15:50609151	T	ENSCAFG00000008168	ENSCAFT00000012989	Transcript	frameshift_variant,feature_elongation	1525-1526	1525-1526	509	-	-	-	-	-1	TIGD4	HGNC	HGNC:18335	protein_coding	YES	-
15:50709210	T	ENSCAFG00000008185	ENSCAFT00000013018	Transcript	stop_gained	564	562	188	E/*	Gaa/Taa	-	-	1	ARFIP1	HGNC	HGNC:21496	protein_coding	YES	-
15:50709242	A	ENSCAFG00000008185	ENSCAFT00000013018	Transcript	frameshift_variant,feature_elongation	596-597	594-595	198-199	-	-	-	-	1	ARFIP1	HGNC	HGNC:21496	protein_coding	YES	-
15:50718623	A	ENSCAFG00000008185	ENSCAFT00000013018	Transcript	missense_variant	789	787	263	A/T	Gcc/Acc	-	-	1	ARFIP1	HGNC	HGNC:21496	protein_coding	YES	deleterious(0.02)
15:5111320-5111321	-	ENSCAFG00000003255	ENSCAFT00000005223	Transcript	frameshift_variant,feature_truncation	33	33	11	-	-	-	-	-1	MANEAL	HGNC	HGNC:26452	protein_coding	YES	-
15:51465237	T	ENSCAFG00000008351	ENSCAFT00000013259	Transcript	missense_variant	2359	2354	785	S/F	tCc/tTc	-	-	1	TLR2	Uniprot_gn	-	protein_coding	YES	deleterious(0)
15:51966634	G	ENSCAFG00000008359	ENSCAFT00000046852	Transcript	missense_variant	5917	4759	1587	T/P	Aca/Cca	-	-	-1	DCHS2	HGNC	HGNC:23111	protein_coding	YES	deleterious(0)
15:51967321	T	ENSCAFG00000008359	ENSCAFT00000046852	Transcript	missense_variant	5230	4072	1358	D/N	Gac/Aac	-	-	-1	DCHS2	HGNC	HGNC:23111	protein_coding	YES	deleterious(0.04)
15:51984143	G	ENSCAFG00000008359	ENSCAFT00000046852	Transcript	splice_donor_variant	-	-	-	-	-	-	-	-1	DCHS2	HGNC	HGNC:23111	protein_coding	YES	-
15:52011821	T	ENSCAFG00000008359	ENSCAFT00000046852	Transcript	missense_variant	1580	422	141	G/E	gGa/gAa	-	-	-1	DCHS2	HGNC	HGNC:23111	protein_coding	YES	deleterious(0)
15:52262033	T	ENSCAFG00000008440	ENSCAFT00000013420	Transcript	missense_variant	1459	1210	404	S/T	Tcc/Acc	-	-	-1	FGG	Uniprot_gn	-	protein_coding	YES	deleterious(0)
15:528653	C	ENSCAFG00000002509	ENSCAFT00000003962	Transcript	missense_variant	986	986	329	H/R	cAc/cGc	-	-	-1	-	-	-	protein_coding	YES	deleterious(0.02)
15:52925361	A	ENSCAFG00000008484	ENSCAFT00000013471	Transcript	missense_variant	347	269	90	S/F	tCt/tTt	-	-	-1	-	-	-	protein_coding	YES	deleterious(0)
15:53301532	C	ENSCAFG00000008566	ENSCAFT00000013605	Transcript	missense_variant	827	827	276	F/S	tTc/tCc	-	-	1	GUCY1B3	EntrezGene	-	protein_coding	YES	deleterious(0)
15:53431032	A	ENSCAFG00000008602	ENSCAFT00000013638	Transcript	missense_variant	849	847	283	R/W	Cgg/Tgg	-	-	-1	CTSO	HGNC	HGNC:2542	protein_coding	YES	deleterious(0)
15:54677475	A	ENSCAFG00000008653	ENSCAFT00000013743	Transcript	missense_variant	1861	1808	603	G/E	gGa/gAa	-	-	1	GRIA2	HGNC	HGNC:4572	protein_coding	YES	deleterious(0)
15:55431445	T	ENSCAFG00000008669	ENSCAFT00000013757	Transcript	missense_variant	619	82	28	P/S	Ccg/Tcg	-	-	1	TMEM144	HGNC	HGNC:25633	protein_coding	YES	deleterious(0)
15:55793219	T	ENSCAFG00000008691	ENSCAFT00000013803	Transcript	missense_variant	176	176	59	G/E	gGa/gAa	-	-	-1	PPID	HGNC	HGNC:9257	protein_coding	YES	deleterious(0.01)
15:55956892	A	ENSCAFG00000008700	ENSCAFT00000013815	Transcript	missense_variant	3221	3221	1074	G/E	gGa/gAa	-	-	1	FNIP2	HGNC	HGNC:29280	protein_coding	YES	deleterious(0)
15:56342572	G	ENSCAFG00000008719	ENSCAFT00000013877	Transcript	missense_variant	3179	3179	1060	L/R	cTt/cGt	-	-	1	RAPGEF2	Uniprot_gn	-	protein_coding	YES	deleterious(0)
15:575741	T	ENSCAFG00000002514	ENSCAFT00000003967	Transcript	missense_variant	658	562	188	A/T	Gcc/Acc	-	-	-1	-	-	-	protein_coding	YES	deleterious(0.03)
15:57986985	T	ENSCAFG00000008759	ENSCAFT00000013937	Transcript	missense_variant	2962	2468	823	R/Q	cGa/cAa	-	-	-1	FSTL5	HGNC	HGNC:21386	protein_coding	YES	deleterious(0.03)
15:57987501	T	ENSCAFG00000008759	ENSCAFT00000013937	Transcript	missense_variant	2446	1952	651	L/Q	cTg/cAg	-	-	-1	FSTL5	HGNC	HGNC:21386	protein_coding	YES	deleterious(0)
15:58111767	T	ENSCAFG00000008759	ENSCAFT00000013937	Transcript	splice_donor_variant	-	-	-	-	-	-	-	-1	FSTL5	HGNC	HGNC:21386	protein_coding	YES	-
15:58111792	A	ENSCAFG00000008759	ENSCAFT00000013937	Transcript	missense_variant	1779	1285	429	V/L	Gtg/Ttg	-	-	-1	FSTL5	HGNC	HGNC:21386	protein_coding	YES	deleterious(0.01)
15:58287891-58287892	-	ENSCAFG00000008759	ENSCAFT00000013937	Transcript	frameshift_variant,feature_truncation	1172	678	226	-	-	-	-	-1	FSTL5	HGNC	HGNC:21386	protein_coding	YES	-
15:6112807	G	ENSCAFG00000032454	ENSCAFT00000045178	Transcript	missense_variant	1147	1007	336	E/G	gAg/gGg	-	-	1	COL8A2	HGNC	HGNC:2216	protein_coding	YES	deleterious(0.01)
15:6117935	A	ENSCAFG00000030689	ENSCAFT00000048860	Transcript	missense_variant	2094	1186	396	R/C	Cgt/Tgt	-	-	-1	ADPRHL2	HGNC	HGNC:21304	protein_coding	YES	deleterious(0.03)
15:617933	T	ENSCAFG00000002526	ENSCAFT00000003998	Transcript	missense_variant	1541	1541	514	S/I	aGt/aTt	-	-	1	LEPRE1	HGNC	HGNC:19316	protein_coding	YES	deleterious(0)
15:620828	T	ENSCAFG00000002526	ENSCAFT00000003998	Transcript	missense_variant	1940	1940	647	P/L	cCc/cTc	-	-	1	LEPRE1	HGNC	HGNC:19316	protein_coding	YES	deleterious(0)
15:621402	G	ENSCAFG00000002526	ENSCAFT00000003998	Transcript	missense_variant	2114	2114	705	E/G	gAa/gGa	-	-	1	LEPRE1	HGNC	HGNC:19316	protein_coding	YES	deleterious(0.03)
15:62537668	A	ENSCAFG00000008936	ENSCAFT00000014213	Transcript	missense_variant	212	212	71	S/F	tCc/tTc	-	-	-1	SPOCK3	HGNC	HGNC:13565	protein_coding	YES	deleterious(0.02)
15:62618132	A	ENSCAFG00000008936	ENSCAFT00000014213	Transcript	missense_variant	91	91	31	R/C	Cgc/Tgc	-	-	-1	SPOCK3	HGNC	HGNC:13565	protein_coding	YES	deleterious(0)
15:630750	T	ENSCAFG00000002540	ENSCAFT00000004009	Transcript	stop_gained	1336	589	197	Q/*	Cag/Tag	-	-	1	CLDN19	HGNC	HGNC:2040	protein_coding	YES	-
15:64133321-64133327	-	ENSCAFG00000009013	ENSCAFT00000014327	Transcript	splice_donor_variant,intron_variant,feature_truncation	-	-	-	-	-	-	-	1	BTC	HGNC	HGNC:1121	protein_coding	YES	-
15:64149745	A	ENSCAFG00000009013	ENSCAFT00000014327	Transcript	missense_variant	636	208	70	G/R	Ggg/Agg	-	-	1	BTC	HGNC	HGNC:1121	protein_coding	YES	deleterious(0.01)
15:6540946	T	ENSCAFG00000003543	ENSCAFT00000005688	Transcript	missense_variant	343	343	115	L/F	Ctc/Ttc	-	-	1	PSMB2	HGNC	HGNC:9539	protein_coding	YES	deleterious(0)
15:6706858	A	ENSCAFG00000003583	ENSCAFT00000005780	Transcript	missense_variant	3829	3829	1277	P/S	Cca/Tca	-	-	-1	ZMYM4	HGNC	HGNC:13055	protein_coding	YES	deleterious(0.01)
15:6966288	A	ENSCAFG00000030692	ENSCAFT00000046593	Transcript	missense_variant	332	332	111	S/F	tCc/tTc	-	-	-1	-	-	-	protein_coding	YES	deleterious(0.04)
15:7194039	T	ENSCAFG00000003609	ENSCAFT00000005804	Transcript	missense_variant	175	175	59	G/S	Ggc/Agc	-	-	-1	GJB4	HGNC	HGNC:4286	protein_coding	YES	deleterious(0.01)
15:7196994	A	ENSCAFG00000003612	ENSCAFT00000005808	Transcript	missense_variant	791	791	264	P/L	cCc/cTc	-	-	-1	GJB5	HGNC	HGNC:4287	protein_coding	YES	deleterious(0)
15:7915409	T	ENSCAFG00000003671	ENSCAFT00000005895	Transcript	missense_variant	263	263	88	R/Q	cGg/cAg	-	-	-1	HMGB4	HGNC	HGNC:24954	protein_coding	YES	deleterious(0.02)
15:8096418	A	ENSCAFG00000003651	ENSCAFT00000005882	Transcript	missense_variant	5318	5318	1773	C/Y	tGc/tAc	-	-	1	CSMD2	HGNC	HGNC:19290	protein_coding	YES	deleterious(0)
15:8109692	G	ENSCAFG00000003651	ENSCAFT00000005882	Transcript	missense_variant	6175	6175	2059	S/G	Agc/Ggc	-	-	1	CSMD2	HGNC	HGNC:19290	protein_coding	YES	deleterious(0.02)
15:8144928	A	ENSCAFG00000003651	ENSCAFT00000005882	Transcript	splice_donor_variant	-	-	-	-	-	-	-	1	CSMD2	HGNC	HGNC:19290	protein_coding	YES	-
15:8187133	T	ENSCAFG00000003651	ENSCAFT00000005882	Transcript	missense_variant	9524	9524	3175	P/L	cCg/cTg	-	-	1	CSMD2	HGNC	HGNC:19290	protein_coding	YES	deleterious(0.04)
15:8189947	A	ENSCAFG00000003651	ENSCAFT00000005882	Transcript	missense_variant	9829	9829	3277	A/T	Gct/Act	-	-	1	CSMD2	HGNC	HGNC:19290	protein_coding	YES	deleterious(0.04)
15:8382548-8382550	-	ENSCAFG00000003680	ENSCAFT00000005915	Transcript	frameshift_variant,feature_truncation	661-662	81-82	27-28	-	-	-	-	1	MYLK3	HGNC	HGNC:29826	protein_coding	YES	-
15:8394031-8394033	-	ENSCAFG00000003680	ENSCAFT00000005915	Transcript	frameshift_variant,feature_truncation	1894-1895	1314-1315	438-439	-	-	-	-	1	MYLK3	HGNC	HGNC:29826	protein_coding	YES	-
15:8396768	CAGGTGCA	ENSCAFG00000003680	ENSCAFT00000005915	Transcript	frameshift_variant,feature_elongation	2254-2255	1674-1675	558-559	-	-	-	-	1	MYLK3	HGNC	HGNC:29826	protein_coding	YES	-
15:8426614	T	ENSCAFG00000003683	ENSCAFT00000005923	Transcript	missense_variant	434	434	145	S/N	aGc/aAc	-	-	-1	ORC6	HGNC	HGNC:17151	protein_coding	YES	deleterious(0.03)
15:8641599	G	ENSCAFG00000003713	ENSCAFT00000005976	Transcript	missense_variant	1103	743	248	R/P	cGc/cCc	-	-	-1	ZYG11B	HGNC	HGNC:25820	protein_coding	YES	deleterious(0.05)
15:8909575	T	ENSCAFG00000003734	ENSCAFT00000006009	Transcript	missense_variant	2755	2755	919	P/S	Cca/Tca	-	-	1	ZCCHC11	HGNC	HGNC:28981	protein_coding	YES	deleterious(0)
15:9359405	A	ENSCAFG00000003790	ENSCAFT00000039721	Transcript	missense_variant	505	448	150	D/N	Gac/Aac	-	-	1	RAB3B	HGNC	HGNC:9778	protein_coding	YES	deleterious(0.03)
15:9486812	G	ENSCAFG00000003803	ENSCAFT00000006167	Transcript	missense_variant	1967	1967	656	D/G	gAc/gGc	-	-	1	NRD1	HGNC	HGNC:7995	protein_coding	YES	deleterious(0)
15:9635778	A	ENSCAFG00000003849	ENSCAFT00000006204	Transcript	missense_variant,splice_region_variant	202	113	38	S/F	tCc/tTc	-	-	-1	OSBPL9	HGNC	HGNC:16386	protein_coding	YES	deleterious(0)
15:9666220	T	ENSCAFG00000003849	ENSCAFT00000006204	Transcript	missense_variant	93	4	2	A/T	Gcg/Acg	-	-	-1	OSBPL9	HGNC	HGNC:16386	protein_coding	YES	deleterious(0.01)
15:9813044	T	ENSCAFG00000003871	ENSCAFT00000006237	Transcript	missense_variant	362	362	121	P/L	cCt/cTt	-	-	1	EPS15	HGNC	HGNC:3419	protein_coding	YES	deleterious(0)
16:10385008	T	ENSCAFG00000003136	ENSCAFT00000005042	Transcript	missense_variant	245	245	82	P/L	cCc/cTc	-	-	1	CCM2	HGNC	HGNC:21708	protein_coding	YES	deleterious(0.05)
16:10775206	A	ENSCAFG00000013481	ENSCAFT00000021383	Transcript	missense_variant	1304	922	308	A/T	Gcc/Acc	-	-	1	CREB3L2	HGNC	HGNC:23720	protein_coding	YES	deleterious(0)
16:12533188	T	ENSCAFG00000031014	ENSCAFT00000045452	Transcript	missense_variant	433	134	45	P/L	cCc/cTc	-	-	1	FAM180A	HGNC	HGNC:33773	protein_coding	YES	deleterious(0.05)
16:12654178	A	ENSCAFG00000003235	ENSCAFT00000005205	Transcript	missense_variant	2401	2401	801	P/S	Cca/Tca	-	-	-1	NUP205	HGNC	HGNC:18658	protein_coding	YES	deleterious(0.02)
16:12657359	T	ENSCAFG00000003235	ENSCAFT00000005205	Transcript	missense_variant	2177	2177	726	G/D	gGc/gAc	-	-	-1	NUP205	HGNC	HGNC:18658	protein_coding	YES	deleterious(0)
16:12896050	T	ENSCAFG00000003221	ENSCAFT00000038296	Transcript	missense_variant	290	290	97	T/M	aCg/aTg	-	-	1	-	-	-	protein_coding	YES	deleterious(0)
16:12933048	T	ENSCAFG00000003213	ENSCAFT00000005159	Transcript	missense_variant	922	922	308	D/N	Gac/Aac	-	-	-1	STRA8	HGNC	HGNC:30653	protein_coding	YES	deleterious(0.05)
16:12983484	G	ENSCAFG00000003190	ENSCAFT00000005137	Transcript	missense_variant	1636	1478	493	D/G	gAc/gGc	-	-	1	WDR91	HGNC	HGNC:24997	protein_coding	YES	deleterious(0.01)
16:12995396-12995397	-	ENSCAFG00000003181	ENSCAFT00000005117	Transcript	frameshift_variant,feature_truncation	164	32	11	-	-	-	-	1	C7orf49	HGNC	HGNC:22432	protein_coding	YES	-
16:13028327	A	ENSCAFG00000003177	ENSCAFT00000005114	Transcript	frameshift_variant,feature_elongation	2917-2918	2353-2354	785	-	-	-	-	-1	AGBL3	HGNC	HGNC:27981	protein_coding	YES	-
16:13070824	C	ENSCAFG00000003177	ENSCAFT00000005114	Transcript	missense_variant	871	307	103	I/V	Att/Gtt	-	-	-1	AGBL3	HGNC	HGNC:27981	protein_coding	YES	deleterious(0.02)
16:13405659	A	ENSCAFG00000003165	ENSCAFT00000005095	Transcript	missense_variant	477	61	21	R/C	Cgt/Tgt	-	-	-1	BPGM	HGNC	HGNC:1093	protein_coding	YES	deleterious(0.04)
16:139728	T	ENSCAFG00000014734	ENSCAFT00000042831	Transcript	missense_variant	1925	1925	642	S/F	tCc/tTc	-	-	1	PKD1L1	HGNC	HGNC:18053	protein_coding	YES	deleterious(0)
16:14145546	T	ENSCAFG00000004378	ENSCAFT00000007028	Transcript	missense_variant	1612	1612	538	E/K	Gag/Aag	-	-	-1	ZNF786	HGNC	HGNC:21806	protein_coding	YES	deleterious(0.04)
16:14505453	A	ENSCAFG00000004450	ENSCAFT00000045150	Transcript	missense_variant	1792	1792	598	E/K	Gag/Aag	-	-	1	KRBA1	HGNC	HGNC:22228	protein_coding	YES	deleterious(0.01)
16:14590490	T	ENSCAFG00000004506	ENSCAFT00000007296	Transcript	stop_gained	12784	12784	4262	R/*	Aga/Tga	-	-	1	-	-	-	protein_coding	YES	-
16:14686184-14686185	-	ENSCAFG00000029424	ENSCAFT00000048690	Transcript	frameshift_variant,feature_truncation	331	270	90	-	-	-	-	1	REPIN1	HGNC	HGNC:17922	protein_coding	YES	-
16:14686530-14686531	-	ENSCAFG00000029424	ENSCAFT00000048690	Transcript	frameshift_variant,feature_truncation	677	616	206	-	-	-	-	1	REPIN1	HGNC	HGNC:17922	protein_coding	YES	-
16:14711085	T	ENSCAFG00000032636	ENSCAFT00000044092	Transcript	missense_variant	1115	1115	372	T/M	aCg/aTg	-	-	1	ZNF775	HGNC	HGNC:28501	protein_coding	YES	deleterious(0)
16:14959650	A	ENSCAFG00000004665	ENSCAFT00000007505	Transcript	missense_variant	226	226	76	L/I	Ctc/Atc	-	-	1	AOC1	HGNC	HGNC:80	protein_coding	YES	deleterious(0.02)
16:14959803	T	ENSCAFG00000004665	ENSCAFT00000007505	Transcript	missense_variant	379	379	127	P/S	Ccc/Tcc	-	-	1	AOC1	HGNC	HGNC:80	protein_coding	YES	deleterious(0)
16:14959815	T	ENSCAFG00000004665	ENSCAFT00000007505	Transcript	stop_gained	391	391	131	R/*	Cga/Tga	-	-	1	AOC1	HGNC	HGNC:80	protein_coding	YES	-
16:15014726	C	ENSCAFG00000025442	ENSCAFT00000039507	Transcript	missense_variant	2078	2078	693	Q/R	cAa/cGa	-	-	-1	KCNH2	EntrezGene	-	protein_coding	YES	deleterious(0)
16:15092168	A	ENSCAFG00000004698	ENSCAFT00000007562	Transcript	missense_variant	2218	1397	466	C/Y	tGc/tAc	-	-	1	ABCB8	HGNC	HGNC:49	protein_coding	YES	deleterious(0.01)
16:15127734	G	ENSCAFG00000004739	ENSCAFT00000007633	Transcript	missense_variant	1157	1157	386	F/S	tTc/tCc	-	-	-1	FASTK	HGNC	HGNC:24676	protein_coding	YES	deleterious(0)
16:15136295-15136299	-	ENSCAFG00000004773	ENSCAFT00000007688	Transcript	frameshift_variant,splice_region_variant,feature_truncation	49-52	49-52	17-18	-	-	-	-	1	AGAP3	HGNC	HGNC:16923	protein_coding	YES	-
16:15191160	T	ENSCAFG00000004773	ENSCAFT00000007688	Transcript	missense_variant	2132	2132	711	A/V	gCg/gTg	-	-	1	AGAP3	HGNC	HGNC:16923	protein_coding	YES	deleterious(0)
16:15196422	A	ENSCAFG00000004799	ENSCAFT00000047932	Transcript	missense_variant	818	818	273	T/I	aCc/aTc	-	-	-1	GBX1	HGNC	HGNC:4185	protein_coding	YES	deleterious(0)
16:15210440-15210441	-	ENSCAFG00000004799	ENSCAFT00000047932	Transcript	frameshift_variant,feature_truncation	358	358	120	-	-	-	-	-1	GBX1	HGNC	HGNC:4185	protein_coding	YES	-
16:15234399	A	ENSCAFG00000004812	ENSCAFT00000007765	Transcript	missense_variant	1739	1697	566	A/V	gCc/gTc	-	-	-1	IQCA1P1	HGNC	HGNC:22831	protein_coding	YES	deleterious(0.01)
16:15236165-15236168	-	ENSCAFG00000004812	ENSCAFT00000007765	Transcript	inframe_deletion	1504-1506	1462-1464	488	K/-	AAG/-	-	-	-1	IQCA1P1	HGNC	HGNC:22831	protein_coding	YES	-
16:15988865	T	ENSCAFG00000004955	ENSCAFT00000007959	Transcript	frameshift_variant,feature_elongation	11182-11183	11139-11140	3713-3714	-	-	-	-	-1	KMT2C	HGNC	HGNC:13726	protein_coding	YES	-
16:171409	A	ENSCAFG00000014734	ENSCAFT00000042831	Transcript	missense_variant	5333	5333	1778	G/D	gGc/gAc	-	-	1	PKD1L1	HGNC	HGNC:18053	protein_coding	YES	deleterious(0.02)
16:17769897	A	ENSCAFG00000005036	ENSCAFT00000008117	Transcript	frameshift_variant,feature_elongation	717-718	357-358	119-120	-	-	-	-	1	DPP6	HGNC	HGNC:3010	protein_coding	YES	-
16:18039415	T	ENSCAFG00000005036	ENSCAFT00000008117	Transcript	missense_variant	2483	2123	708	T/M	aCg/aTg	-	-	1	DPP6	HGNC	HGNC:3010	protein_coding	YES	deleterious(0)
16:18041789	A	ENSCAFG00000005036	ENSCAFT00000008117	Transcript	missense_variant	2764	2404	802	E/K	Gag/Aag	-	-	1	DPP6	HGNC	HGNC:3010	protein_coding	YES	deleterious(0.01)
16:18093552	T	ENSCAFG00000005062	ENSCAFT00000008164	Transcript	missense_variant	496	496	166	D/N	Gat/Aat	-	-	-1	PAXIP1	HGNC	HGNC:8624	protein_coding	YES	deleterious(0)
16:184122	T	ENSCAFG00000014734	ENSCAFT00000042831	Transcript	missense_variant,splice_region_variant	6644	6644	2215	P/L	cCc/cTc	-	-	1	PKD1L1	HGNC	HGNC:18053	protein_coding	YES	deleterious(0.01)
16:184140	T	ENSCAFG00000014734	ENSCAFT00000042831	Transcript	missense_variant	6662	6662	2221	T/M	aCg/aTg	-	-	1	PKD1L1	HGNC	HGNC:18053	protein_coding	YES	deleterious(0)
16:18594690	A	ENSCAFG00000005086	ENSCAFT00000038577	Transcript	missense_variant	2177	2177	726	R/H	cGc/cAc	-	-	1	RBM33	HGNC	HGNC:27223	protein_coding	YES	deleterious(0)
16:2086779-2086786	-	ENSCAFG00000003440	ENSCAFT00000005562	Transcript	splice_donor_variant,intron_variant,feature_truncation	-	-	-	-	-	-	-	-1	CUL1	HGNC	HGNC:2551	protein_coding	YES	-
16:20934359	T	ENSCAFG00000005255	ENSCAFT00000008482	Transcript	missense_variant	1188	772	258	V/M	Gtg/Atg	-	-	-1	VIPR2	HGNC	HGNC:12695	protein_coding	YES	deleterious(0.02)
16:21388191	T	ENSCAFG00000005301	ENSCAFT00000008557	Transcript	missense_variant	2569	2569	857	A/T	Gcc/Acc	-	-	-1	PSD3	HGNC	HGNC:19093	protein_coding	YES	deleterious(0.01)
16:22944172-22944175	-	ENSCAFG00000005418	ENSCAFT00000008714	Transcript	inframe_deletion	201-203	201-203	67-68	CN/C	tgCAAc/tgc	-	-	1	THAP1	HGNC	HGNC:20856	protein_coding	YES	-
16:22944172-22944175	-	ENSCAFG00000005418	ENSCAFT00000048455	Transcript	inframe_deletion	436-438	435-437	145-146	CN/C	tgCAAc/tgc	-	-	1	THAP1	HGNC	HGNC:20856	protein_coding	-	-
16:23302387-23302388	-	ENSCAFG00000005508	ENSCAFT00000008879	Transcript	frameshift_variant,feature_truncation	69	69	23	-	-	-	-	1	DKK4	HGNC	HGNC:2894	protein_coding	YES	-
16:23304798	T	ENSCAFG00000005508	ENSCAFT00000008879	Transcript	missense_variant	631	631	211	R/W	Cgg/Tgg	-	-	1	DKK4	HGNC	HGNC:2894	protein_coding	YES	deleterious(0.02)
16:23492729	A	ENSCAFG00000005575	ENSCAFT00000008984	Transcript	missense_variant	1848	1348	450	G/S	Ggc/Agc	-	-	1	-	-	-	protein_coding	YES	deleterious(0)
16:23909649	T	ENSCAFG00000005691	ENSCAFT00000009193	Transcript	missense_variant	1910	1910	637	A/V	gCc/gTc	-	-	1	ANK1	HGNC	HGNC:492	protein_coding	YES	deleterious(0.01)
16:23924604	A	ENSCAFG00000005691	ENSCAFT00000009193	Transcript	missense_variant	3370	3370	1124	G/S	Ggc/Agc	-	-	1	ANK1	HGNC	HGNC:492	protein_coding	YES	deleterious(0)
16:24009432	TTTTTT	ENSCAFG00000005716	ENSCAFT00000009228	Transcript	inframe_insertion	63-64	19-20	7	I/KKI	atc/aAAAAAAtc	-	-	-1	AGPAT6	HGNC	HGNC:20880	protein_coding	YES	-
16:24009438	TTTT	ENSCAFG00000005716	ENSCAFT00000009228	Transcript	frameshift_variant,feature_elongation	57-58	13-14	5	-	-	-	-	-1	AGPAT6	HGNC	HGNC:20880	protein_coding	YES	-
16:24009439	TTTTATTTTATT	ENSCAFG00000005716	ENSCAFT00000009228	Transcript	inframe_insertion	56-57	12-13	4-5	-/NKIK	-/AATAAAATAAAA	-	-	-1	AGPAT6	HGNC	HGNC:20880	protein_coding	YES	-
16:24009440-24009441	-	ENSCAFG00000005716	ENSCAFT00000009228	Transcript	frameshift_variant,feature_truncation	55	11	4	-	-	-	-	-1	AGPAT6	HGNC	HGNC:20880	protein_coding	YES	-
16:24622319	T	ENSCAFG00000005744	ENSCAFT00000009247	Transcript	missense_variant	360	86	29	R/L	cGc/cTc	-	-	1	ZMAT4	HGNC	HGNC:25844	protein_coding	YES	deleterious(0)
16:26080004	C	ENSCAFG00000005832	ENSCAFT00000009405	Transcript	missense_variant	1646	1646	549	L/R	cTa/cGa	-	-	-1	-	-	-	protein_coding	YES	deleterious(0)
16:26555792	A	ENSCAFG00000029617	ENSCAFT00000049633	Transcript	missense_variant	1291	500	167	R/H	cGt/cAt	-	-	1	TM2D2	HGNC	HGNC:24127	protein_coding	YES	deleterious(0)
16:26562903	A	ENSCAFG00000005863	ENSCAFT00000009452	Transcript	missense_variant	811	811	271	R/W	Cgg/Tgg	-	-	-1	HTRA4	HGNC	HGNC:26909	protein_coding	YES	deleterious(0)
16:26566794	A	ENSCAFG00000005863	ENSCAFT00000009452	Transcript	missense_variant	332	332	111	S/F	tCt/tTt	-	-	-1	HTRA4	HGNC	HGNC:26909	protein_coding	YES	deleterious(0)
16:26691895-26691896	-	ENSCAFG00000005876	ENSCAFT00000009478	Transcript	frameshift_variant,feature_truncation	2275	1793	598	-	-	-	-	-1	TACC1	HGNC	HGNC:11522	protein_coding	YES	-
16:26691899-26691900	-	ENSCAFG00000005876	ENSCAFT00000009478	Transcript	frameshift_variant,feature_truncation	2271	1789	597	-	-	-	-	-1	TACC1	HGNC	HGNC:11522	protein_coding	YES	-
16:27062517	T	ENSCAFG00000005970	ENSCAFT00000009709	Transcript	missense_variant	260	172	58	R/W	Cgg/Tgg	-	-	1	FGFR1	HGNC	HGNC:3688	protein_coding	YES	deleterious(0.02)
16:27218349	A	ENSCAFG00000006057	ENSCAFT00000009828	Transcript	missense_variant	3769	3769	1257	E/K	Gag/Aag	-	-	1	WHSC1L1	HGNC	HGNC:12767	protein_coding	YES	deleterious(0)
16:27248553	T	ENSCAFG00000006099	ENSCAFT00000009882	Transcript	missense_variant	911	911	304	I/N	aTt/aAt	-	-	-1	DDHD2	HGNC	HGNC:29106	protein_coding	YES	deleterious(0)
16:27275436	A	ENSCAFG00000006108	ENSCAFT00000009890	Transcript	missense_variant	688	688	230	P/S	Cca/Tca	-	-	-1	BAG4	HGNC	HGNC:940	protein_coding	YES	deleterious(0.03)
16:27329226	A	ENSCAFG00000006126	ENSCAFT00000009932	Transcript	missense_variant	704	316	106	D/N	Gac/Aac	-	-	1	STAR	EntrezGene	-	protein_coding	YES	deleterious(0.01)
16:27445988	A	ENSCAFG00000006161	ENSCAFT00000009965	Transcript	missense_variant	388	388	130	A/T	Gcc/Acc	-	-	1	ADRB3	EntrezGene	-	protein_coding	YES	deleterious(0.01)
16:27518612	A	ENSCAFG00000006176	ENSCAFT00000009990	Transcript	missense_variant	577	577	193	A/T	Gcc/Acc	-	-	1	GOT1L1	Uniprot_gn	-	protein_coding	YES	deleterious(0.01)
16:27582951	T	ENSCAFG00000006188	ENSCAFT00000044415	Transcript	missense_variant	164	164	55	S/N	aGc/aAc	-	-	-1	GPR124	HGNC	HGNC:17849	protein_coding	YES	deleterious(0.05)
16:27629365	A	ENSCAFG00000006211	ENSCAFT00000010037	Transcript	missense_variant	560	538	180	R/C	Cgc/Tgc	-	-	-1	ERLIN2	HGNC	HGNC:1356	protein_coding	YES	deleterious(0)
16:29223011-29223020	-	ENSCAFG00000006252	ENSCAFT00000010155	Transcript	splice_donor_variant,intron_variant,feature_truncation	-	-	-	-	-	-	-	-1	UNC5D	HGNC	HGNC:18634	protein_coding	YES	-
16:29416216	G	ENSCAFG00000006252	ENSCAFT00000010155	Transcript	missense_variant	415	218	73	R/P	cGc/cCc	-	-	-1	UNC5D	HGNC	HGNC:18634	protein_coding	YES	deleterious(0)
16:3084961	T	ENSCAFG00000025531	ENSCAFT00000005604	Transcript	missense_variant,splice_region_variant	1470	1409	470	G/D	gGt/gAt	-	-	-1	-	-	-	protein_coding	YES	deleterious(0.01)
16:31264759	C	ENSCAFG00000006336	ENSCAFT00000010244	Transcript	missense_variant	1504	1233	411	W/C	tgG/tgC	-	-	1	FUT10	HGNC	HGNC:19234	protein_coding	YES	deleterious(0.02)
16:33707492	T	ENSCAFG00000006489	ENSCAFT00000010484	Transcript	missense_variant	29	25	9	R/W	Cgg/Tgg	-	-	1	GTF2E2	HGNC	HGNC:4651	protein_coding	YES	deleterious(0)
16:3390494	A	ENSCAFG00000025531	ENSCAFT00000005604	Transcript	missense_variant	410	349	117	R/W	Cgg/Tgg	-	-	-1	-	-	-	protein_coding	YES	deleterious(0.01)
16:34847350	TGAAATAACATGC	ENSCAFG00000006632	ENSCAFT00000010746	Transcript	frameshift_variant,splice_region_variant,feature_elongation	3949-3950	3551-3552	1184	-	-	-	-	-1	TNKS	HGNC	HGNC:11941	protein_coding	YES	-
16:356708	C	ENSCAFG00000012301	ENSCAFT00000019533	Transcript	missense_variant,splice_region_variant	475	475	159	Y/H	Tac/Cac	-	-	1	-	-	-	protein_coding	YES	deleterious(0)
16:366844	T	ENSCAFG00000012301	ENSCAFT00000019533	Transcript	missense_variant	896	896	299	S/F	tCc/tTc	-	-	1	-	-	-	protein_coding	YES	deleterious(0)
16:36995553	A	ENSCAFG00000006778	ENSCAFT00000010912	Transcript	frameshift_variant,feature_elongation	985-986	589-590	197	-	-	-	-	1	C8orf48	HGNC	HGNC:26345	protein_coding	YES	-
16:380471	T	ENSCAFG00000012301	ENSCAFT00000019533	Transcript	missense_variant	1199	1199	400	T/M	aCg/aTg	-	-	1	-	-	-	protein_coding	YES	deleterious(0)
16:38949185	T	ENSCAFG00000006815	ENSCAFT00000010967	Transcript	missense_variant	254	254	85	S/F	tCt/tTt	-	-	1	TUSC3	HGNC	HGNC:30242	protein_coding	YES	deleterious(0)
16:39466210	T	ENSCAFG00000006830	ENSCAFT00000010988	Transcript	missense_variant	1010	1010	337	G/E	gGa/gAa	-	-	-1	MSR1	HGNC	HGNC:7376	protein_coding	YES	deleterious(0)
16:40622313-40622400	-	ENSCAFG00000006905	ENSCAFT00000038933	Transcript	splice_acceptor_variant,3_prime_UTR_variant,intron_variant,feature_truncation	?-1194	-	-	-	-	-	-	1	VPS37A	HGNC	HGNC:24928	protein_coding	YES	-
16:42954906	T	ENSCAFG00000007217	ENSCAFT00000011588	Transcript	missense_variant	1252	1252	418	D/N	Gac/Aac	-	-	-1	TRIML1	HGNC	HGNC:26698	protein_coding	YES	deleterious(0)
16:42999648	C	ENSCAFG00000007236	ENSCAFT00000011597	Transcript	missense_variant	1974	1034	345	M/T	aTg/aCg	-	-	1	-	-	-	protein_coding	YES	deleterious(0.04)
16:44130997-44130999	-	ENSCAFG00000007273	ENSCAFT00000011726	Transcript	frameshift_variant,feature_truncation	3544-3545	2595-2596	865-866	-	-	-	-	1	FAT1	HGNC	HGNC:3595	protein_coding	YES	-
16:44541766	G	ENSCAFG00000007384	ENSCAFT00000011851	Transcript	missense_variant	224	224	75	V/A	gTc/gCc	-	-	-1	CYP4V2	HGNC	HGNC:23198	protein_coding	YES	deleterious(0.01)
16:44620112	T	ENSCAFG00000007406	ENSCAFT00000011868	Transcript	missense_variant	1604	1604	535	I/N	aTt/aAt	-	-	-1	TLR3	Uniprot_gn	-	protein_coding	YES	deleterious(0)
16:45026375	A	ENSCAFG00000007475	ENSCAFT00000011984	Transcript	missense_variant	1916	1735	579	E/K	Gaa/Aaa	-	-	1	SORBS2	HGNC	HGNC:24098	protein_coding	YES	deleterious(0)
16:45055043	A	ENSCAFG00000007475	ENSCAFT00000011984	Transcript	missense_variant	3573	3392	1131	R/H	cGt/cAt	-	-	1	SORBS2	HGNC	HGNC:24098	protein_coding	YES	deleterious(0.03)
16:45758428-45758438	-	ENSCAFG00000007662	ENSCAFT00000012314	Transcript	frameshift_variant,feature_truncation	407-416	131-140	44-47	-	-	-	-	1	ACSL1	HGNC	HGNC:3569	protein_coding	YES	-
16:45783330-45783349	-	ENSCAFG00000007662	ENSCAFT00000012314	Transcript	splice_acceptor_variant,coding_sequence_variant,intron_variant,feature_truncation	?-766	?-490	?-164	-	-	-	-	1	ACSL1	HGNC	HGNC:3569	protein_coding	YES	-
16:46845590	G	ENSCAFG00000007884	ENSCAFT00000012594	Transcript	missense_variant	572	572	191	K/T	aAg/aCg	-	-	-1	ING2	HGNC	HGNC:6063	protein_coding	YES	deleterious(0)
16:47495576	A	ENSCAFG00000008123	ENSCAFT00000013138	Transcript	missense_variant	3239	3239	1080	S/L	tCa/tTa	-	-	-1	TENM3	HGNC	HGNC:29944	protein_coding	YES	deleterious(0)
16:52951738	T	ENSCAFG00000008409	ENSCAFT00000013360	Transcript	missense_variant	357	191	64	S/F	tCc/tTc	-	-	1	VEGFC	HGNC	HGNC:12682	protein_coding	YES	deleterious(0)
16:52968125-52968130	-	ENSCAFG00000008409	ENSCAFT00000013360	Transcript	frameshift_variant,feature_truncation	839-843	673-677	225-226	-	-	-	-	1	VEGFC	HGNC	HGNC:12682	protein_coding	YES	-
16:55155135	T	ENSCAFG00000008686	ENSCAFT00000013885	Transcript	missense_variant	8500	8500	2834	D/N	Gat/Aat	-	-	-1	CSMD1	HGNC	HGNC:14026	protein_coding	YES	deleterious(0.03)
16:5637555	T	ENSCAFG00000003500	ENSCAFT00000005624	Transcript	missense_variant	1632	1537	513	G/C	Ggc/Tgc	-	-	1	NOBOX	HGNC	HGNC:22448	protein_coding	YES	deleterious(0)
16:5665298	A	ENSCAFG00000003503	ENSCAFT00000005632	Transcript	missense_variant	1720	1532	511	P/L	cCg/cTg	-	-	-1	ARHGEF5	HGNC	HGNC:13209	protein_coding	YES	deleterious(0.03)
16:58428932	T	ENSCAFG00000008597	ENSCAFT00000013697	Transcript	missense_variant	364	364	122	V/M	Gtg/Atg	-	-	-1	ANGPT2	Uniprot_gn	-	protein_coding	YES	deleterious(0.03)
16:6086918	A	ENSCAFG00000003528	ENSCAFT00000005664	Transcript	missense_variant	790	790	264	G/S	Ggc/Agc	-	-	1	FAM115A	HGNC	HGNC:22201	protein_coding	YES	deleterious(0)
16:6301521	A	ENSCAFG00000003578	ENSCAFT00000005788	Transcript	stop_gained	2607	2430	810	W/*	tgG/tgA	-	-	1	EPHA1	HGNC	HGNC:3385	protein_coding	YES	-
16:6301561	A	ENSCAFG00000003578	ENSCAFT00000005788	Transcript	missense_variant	2647	2470	824	D/N	Gac/Aac	-	-	1	EPHA1	HGNC	HGNC:3385	protein_coding	YES	deleterious(0)
16:6335830	A	ENSCAFG00000003616	ENSCAFT00000039469	Transcript	missense_variant	974	46	16	A/T	Gcc/Acc	-	-	1	FAM131B	HGNC	HGNC:22202	protein_coding	YES	deleterious(0.02)
16:6335981	T	ENSCAFG00000003616	ENSCAFT00000039469	Transcript	missense_variant	1125	197	66	S/L	tCa/tTa	-	-	1	FAM131B	HGNC	HGNC:22202	protein_coding	YES	deleterious(0)
16:6360286	T	ENSCAFG00000003619	ENSCAFT00000020333	Transcript	missense_variant	1200	1109	370	R/H	cGc/cAc	-	-	-1	CLCN1	Uniprot_gn	-	protein_coding	YES	deleterious(0)
16:6380909	T	ENSCAFG00000003623	ENSCAFT00000005851	Transcript	missense_variant,splice_region_variant	1299	1228	410	V/M	Gtg/Atg	-	-	-1	CASP2	HGNC	HGNC:1503	protein_coding	YES	deleterious(0)
16:6568401	A	ENSCAFG00000003654	ENSCAFT00000005874	Transcript	missense_variant	164	164	55	T/M	aCg/aTg	-	-	-1	OR6V1	HGNC	HGNC:15090	protein_coding	YES	deleterious(0.01)
16:6705636	T	ENSCAFG00000025465	ENSCAFT00000005912	Transcript	missense_variant	2107	2107	703	R/W	Cgg/Tgg	-	-	1	TRPV6	HGNC	HGNC:14006	protein_coding	YES	deleterious(0.02)
16:6713390	A	ENSCAFG00000003745	ENSCAFT00000006074	Transcript	missense_variant	815	815	272	P/L	cCc/cTc	-	-	-1	EPHB6	HGNC	HGNC:3396	protein_coding	YES	deleterious(0.03)
16:6713735	A	ENSCAFG00000003745	ENSCAFT00000006074	Transcript	missense_variant	470	470	157	T/I	aCc/aTc	-	-	-1	EPHB6	HGNC	HGNC:3396	protein_coding	YES	deleterious(0)
16:6820592	T	ENSCAFG00000031359	ENSCAFT00000045917	Transcript	missense_variant	340	296	99	S/Y	tCt/tAt	-	-	-1	TRBV24-1	HGNC	HGNC:12203	protein_coding	YES	deleterious(0)
16:6978645	A	ENSCAFG00000003818	ENSCAFT00000006138	Transcript	missense_variant	661	622	208	G/R	Gga/Aga	-	-	1	-	-	-	protein_coding	YES	deleterious(0.01)
16:7026813	A	ENSCAFG00000030973	ENSCAFT00000047252	Transcript	stop_gained	1051	528	176	W/*	tgG/tgA	-	-	1	-	-	-	protein_coding	YES	-
16:7059609	T	ENSCAFG00000025371	ENSCAFT00000006189	Transcript	missense_variant	4391	4006	1336	V/I	Gtt/Att	-	-	-1	-	-	-	protein_coding	YES	deleterious(0.05)
16:7102012	T	ENSCAFG00000025371	ENSCAFT00000006189	Transcript	missense_variant	795	410	137	R/H	cGt/cAt	-	-	-1	-	-	-	protein_coding	YES	deleterious(0)
16:7147756-7147759	-	ENSCAFG00000003841	ENSCAFT00000006192	Transcript	inframe_deletion	4081-4083	4006-4008	1336	V/-	GTC/-	-	-	-1	MGAM	HGNC	HGNC:7043	protein_coding	-	-
16:7147756-7147759	-	ENSCAFG00000003841	ENSCAFT00000006194	Transcript	inframe_deletion	4063-4065	4063-4065	1355	V/-	GTC/-	-	-	-1	MGAM	HGNC	HGNC:7043	protein_coding	YES	-
16:7152173	T	ENSCAFG00000003841	ENSCAFT00000006194	Transcript	missense_variant	3616	3616	1206	D/N	Gac/Aac	-	-	-1	MGAM	HGNC	HGNC:7043	protein_coding	YES	deleterious(0)
16:7154589	A	ENSCAFG00000003841	ENSCAFT00000006194	Transcript	missense_variant	3281	3281	1094	T/M	aCg/aTg	-	-	-1	MGAM	HGNC	HGNC:7043	protein_coding	YES	deleterious(0)
16:7177367	A	ENSCAFG00000003841	ENSCAFT00000006194	Transcript	missense_variant	1111	1111	371	L/F	Ctt/Ttt	-	-	-1	MGAM	HGNC	HGNC:7043	protein_coding	YES	deleterious(0)
16:7244099	T	ENSCAFG00000003864	ENSCAFT00000006226	Transcript	missense_variant	401	122	41	T/I	aCt/aTt	-	-	1	CLEC5A	HGNC	HGNC:2054	protein_coding	YES	deleterious(0.01)
16:7485025	A	ENSCAFG00000003889	ENSCAFT00000006250	Transcript	missense_variant	270	248	83	P/L	cCc/cTc	-	-	-1	WEE2	Uniprot_gn	-	protein_coding	YES	deleterious(0)
16:7571996	A	ENSCAFG00000003893	ENSCAFT00000006263	Transcript	missense_variant	1398	923	308	S/F	tCc/tTc	-	-	-1	AGK	HGNC	HGNC:21869	protein_coding	YES	deleterious(0)
16:8307686	T	ENSCAFG00000003907	ENSCAFT00000006306	Transcript	missense_variant	2098	2098	700	P/S	Cca/Tca	-	-	1	BRAF	HGNC	HGNC:1097	protein_coding	YES	deleterious(0)
16:8778646	A	ENSCAFG00000003990	ENSCAFT00000006395	Transcript	missense_variant	731	185	62	R/H	cGt/cAt	-	-	1	KDM7A	HGNC	HGNC:22224	protein_coding	YES	deleterious(0)
16:8784333	A	ENSCAFG00000003990	ENSCAFT00000006395	Transcript	missense_variant	1105	559	187	E/K	Gaa/Aaa	-	-	1	KDM7A	HGNC	HGNC:22224	protein_coding	YES	deleterious(0)
16:8924916	A	ENSCAFG00000004011	ENSCAFT00000006437	Transcript	missense_variant	835	643	215	R/C	Cgt/Tgt	-	-	-1	TBXAS1	HGNC	HGNC:11609	protein_coding	YES	deleterious(0.04)
16:9548926	G	ENSCAFG00000004096	ENSCAFT00000006553	Transcript	splice_donor_variant	-	-	-	-	-	-	-	-1	TTC26	HGNC	HGNC:21882	protein_coding	YES	-
16:9762261	T	ENSCAFG00000004115	ENSCAFT00000006593	Transcript	missense_variant	3493	3172	1058	R/C	Cgc/Tgc	-	-	1	KIAA1549	HGNC	HGNC:22219	protein_coding	YES	deleterious(0)
16:9767889	A	ENSCAFG00000004115	ENSCAFT00000006593	Transcript	missense_variant,splice_region_variant	3815	3494	1165	V/D	gTt/gAt	-	-	1	KIAA1549	HGNC	HGNC:22219	protein_coding	YES	deleterious(0)
16:9963831	A	ENSCAFG00000004319	ENSCAFT00000006928	Transcript	missense_variant	131	131	44	G/E	gGa/gAa	-	-	1	SVOPL	HGNC	HGNC:27034	protein_coding	YES	deleterious(0)
17:10660363	A	ENSCAFG00000003647	ENSCAFT00000005868	Transcript	missense_variant	587	587	196	P/Q	cCg/cAg	-	-	1	FAM84A	HGNC	HGNC:20743	protein_coding	YES	deleterious(0)
17:11112597	C	ENSCAFG00000003657	ENSCAFT00000005890	Transcript	missense_variant	6499	6499	2167	S/G	Agc/Ggc	-	-	-1	NBAS	HGNC	HGNC:15625	protein_coding	YES	deleterious(0.02)
17:11186926	C	ENSCAFG00000003657	ENSCAFT00000005890	Transcript	missense_variant	5117	5117	1706	E/G	gAg/gGg	-	-	-1	NBAS	HGNC	HGNC:15625	protein_coding	YES	deleterious(0)
17:11254468	T	ENSCAFG00000003657	ENSCAFT00000005890	Transcript	missense_variant	3514	3514	1172	D/N	Gac/Aac	-	-	-1	NBAS	HGNC	HGNC:15625	protein_coding	YES	deleterious(0.03)
17:12219137	TCA	ENSCAFG00000003717	ENSCAFT00000005984	Transcript	inframe_insertion	679-680	679-680	227	T/MT	acg/aTGAcg	-	-	-1	FAM49A	HGNC	HGNC:25373	protein_coding	YES	-
17:13226786	T	ENSCAFG00000003748	ENSCAFT00000006025	Transcript	missense_variant	1234	1192	398	P/S	Cca/Tca	-	-	1	GEN1	HGNC	HGNC:26881	protein_coding	YES	deleterious(0.02)
17:13336584	T	ENSCAFG00000003752	ENSCAFT00000006030	Transcript	missense_variant	211	211	71	R/W	Cgg/Tgg	-	-	1	-	-	-	protein_coding	YES	deleterious(0)
17:13865509	T	ENSCAFG00000003760	ENSCAFT00000006066	Transcript	missense_variant	799	799	267	E/K	Gaa/Aaa	-	-	-1	-	-	-	protein_coding	YES	deleterious(0)
17:13865589	T	ENSCAFG00000003760	ENSCAFT00000006066	Transcript	missense_variant	719	719	240	R/H	cGc/cAc	-	-	-1	-	-	-	protein_coding	YES	deleterious(0.01)
17:18578832	C	ENSCAFG00000031185	ENSCAFT00000048392	Transcript	splice_acceptor_variant	-	-	-	-	-	-	-	-1	PFN4	HGNC	HGNC:31103	protein_coding	YES	-
17:19086240	T	ENSCAFG00000004075	ENSCAFT00000006536	Transcript	missense_variant	3016	2999	1000	P/L	cCt/cTt	-	-	1	NCOA1	HGNC	HGNC:7668	protein_coding	YES	deleterious(0.01)
17:19403958	T	ENSCAFG00000004136	ENSCAFT00000006641	Transcript	missense_variant	863	568	190	P/S	Cca/Tca	-	-	1	EFR3B	HGNC	HGNC:29155	protein_coding	YES	deleterious(0.01)
17:19629951	A	ENSCAFG00000004223	ENSCAFT00000006795	Transcript	missense_variant	988	988	330	R/C	Cgc/Tgc	-	-	-1	DTNB	HGNC	HGNC:3058	protein_coding	YES	deleterious(0.01)
17:202291	A	ENSCAFG00000003200	ENSCAFT00000005142	Transcript	stop_gained	853	853	285	Q/*	Cag/Tag	-	-	-1	SH3YL1	HGNC	HGNC:29546	protein_coding	YES	-
17:20307856	T	ENSCAFG00000004267	ENSCAFT00000006890	Transcript	missense_variant	2062	2062	688	G/R	Gga/Aga	-	-	-1	HADHA	HGNC	HGNC:4801	protein_coding	YES	deleterious(0)
17:20329758	T	ENSCAFG00000004267	ENSCAFT00000006890	Transcript	missense_variant	836	836	279	T/N	aCc/aAc	-	-	-1	HADHA	HGNC	HGNC:4801	protein_coding	YES	deleterious(0)
17:20409578	T	ENSCAFG00000004328	ENSCAFT00000036246	Transcript	missense_variant	1106	1106	369	G/E	gGg/gAg	-	-	-1	GPR113	HGNC	HGNC:18989	protein_coding	YES	deleterious(0)
17:20521858	T	ENSCAFG00000004385	ENSCAFT00000007145	Transcript	missense_variant	5752	5752	1918	E/K	Gag/Aag	-	-	-1	OTOF	HGNC	HGNC:8515	protein_coding	YES	deleterious(0)
17:20522005	A	ENSCAFG00000004385	ENSCAFT00000007145	Transcript	missense_variant,splice_region_variant	5711	5711	1904	T/M	aCg/aTg	-	-	-1	OTOF	HGNC	HGNC:8515	protein_coding	YES	deleterious(0)
17:20818849	T	ENSCAFG00000004457	ENSCAFT00000007185	Transcript	stop_gained	700	382	128	R/*	Cga/Tga	-	-	1	CENPA	HGNC	HGNC:1851	protein_coding	YES	-
17:21187239	T	ENSCAFG00000004818	ENSCAFT00000007766	Transcript	missense_variant	1066	716	239	R/H	cGc/cAc	-	-	-1	SLC5A6	HGNC	HGNC:11041	protein_coding	YES	deleterious(0.01)
17:21205406	T	ENSCAFG00000004767	ENSCAFT00000007712	Transcript	missense_variant	1648	1648	550	R/W	Cgg/Tgg	-	-	1	CAD	HGNC	HGNC:1424	protein_coding	YES	deleterious(0)
17:21277658	A	ENSCAFG00000004835	ENSCAFT00000007815	Transcript	missense_variant	1895	940	314	V/M	Gtg/Atg	-	-	1	TRIM54	HGNC	HGNC:16008	protein_coding	YES	deleterious(0)
17:21279044	A	ENSCAFG00000023388	ENSCAFT00000035937	Transcript	missense_variant	269	269	90	S/F	tCc/tTc	-	-	-1	UCN	HGNC	HGNC:12516	protein_coding	YES	deleterious(0)
17:21279191	T	ENSCAFG00000023388	ENSCAFT00000035937	Transcript	missense_variant	122	122	41	R/H	cGc/cAc	-	-	-1	UCN	HGNC	HGNC:12516	protein_coding	YES	deleterious(0.03)
17:21330881	T	ENSCAFG00000004899	ENSCAFT00000007887	Transcript	missense_variant	1015	1015	339	R/W	Cgg/Tgg	-	-	1	SNX17	HGNC	HGNC:14979	protein_coding	YES	deleterious(0.02)
17:21332781	T	ENSCAFG00000004909	ENSCAFT00000007894	Transcript	missense_variant	1472	1472	491	R/H	cGc/cAc	-	-	-1	ZNF513	HGNC	HGNC:26498	protein_coding	YES	deleterious(0)
17:21390385	T	ENSCAFG00000005048	ENSCAFT00000008224	Transcript	missense_variant	5109	4927	1643	E/K	Gaa/Aaa	-	-	-1	IFT172	HGNC	HGNC:30391	protein_coding	YES	deleterious(0.03)
17:21412410	A	ENSCAFG00000005048	ENSCAFT00000008224	Transcript	missense_variant,splice_region_variant	1704	1522	508	R/C	Cgt/Tgt	-	-	-1	IFT172	HGNC	HGNC:30391	protein_coding	YES	deleterious(0)
17:21412419	A	ENSCAFG00000005048	ENSCAFT00000008224	Transcript	missense_variant	1695	1513	505	R/W	Cgg/Tgg	-	-	-1	IFT172	HGNC	HGNC:30391	protein_coding	YES	deleterious(0)
17:21417067	G	ENSCAFG00000005048	ENSCAFT00000008224	Transcript	missense_variant	1272	1090	364	G/R	Gga/Cga	-	-	-1	IFT172	HGNC	HGNC:30391	protein_coding	YES	deleterious(0)
17:21418808	A	ENSCAFG00000005048	ENSCAFT00000008224	Transcript	missense_variant	1131	949	317	L/F	Ctc/Ttc	-	-	-1	IFT172	HGNC	HGNC:30391	protein_coding	YES	deleterious(0.04)
17:21420559	A	ENSCAFG00000005048	ENSCAFT00000008224	Transcript	missense_variant	831	649	217	R/W	Cgg/Tgg	-	-	-1	IFT172	HGNC	HGNC:30391	protein_coding	YES	deleterious(0)
17:2160436	A	ENSCAFG00000003265	ENSCAFT00000005235	Transcript	missense_variant	188	188	63	G/E	gGa/gAa	-	-	1	COLEC11	HGNC	HGNC:17213	protein_coding	YES	deleterious(0)
17:21841702	T	ENSCAFG00000005191	ENSCAFT00000008378	Transcript	missense_variant	563	563	188	R/H	cGc/cAc	-	-	-1	RBKS	HGNC	HGNC:30325	protein_coding	YES	deleterious(0.01)
17:2214955-2214959	-	ENSCAFG00000003277	ENSCAFT00000005258	Transcript	frameshift_variant,feature_truncation	1091-1094	1091-1094	364-365	-	-	-	-	1	ALLC	HGNC	HGNC:17377	protein_coding	YES	-
17:22351944	T	ENSCAFG00000005212	ENSCAFT00000008404	Transcript	missense_variant	1214	221	74	P/L	cCg/cTg	-	-	1	FOSL2	HGNC	HGNC:3798	protein_coding	YES	deleterious(0)
17:22507022	A	ENSCAFG00000005225	ENSCAFT00000008431	Transcript	missense_variant	1714	1714	572	C/S	Tgt/Agt	-	-	1	PLB1	HGNC	HGNC:30041	protein_coding	YES	deleterious(0.01)
17:22548993	A	ENSCAFG00000005225	ENSCAFT00000008431	Transcript	missense_variant	3947	3947	1316	R/H	cGc/cAc	-	-	1	PLB1	HGNC	HGNC:30041	protein_coding	YES	deleterious(0.02)
17:2256749	C	ENSCAFG00000003283	ENSCAFT00000005263	Transcript	missense_variant	778	423	141	K/N	aaA/aaC	-	-	1	DCDC2C	HGNC	HGNC:32696	protein_coding	YES	deleterious(0.05)
17:22756740	C	ENSCAFG00000031908	ENSCAFT00000048716	Transcript	frameshift_variant,feature_elongation	1442-1443	609-610	203-204	-	-	-	-	-1	TRMT61B	HGNC	HGNC:26070	protein_coding	YES	-
17:22868952	T	ENSCAFG00000005258	ENSCAFT00000008480	Transcript	missense_variant	2248	1724	575	R/I	aGa/aTa	-	-	1	FAM179A	HGNC	HGNC:33715	protein_coding	YES	deleterious(0.02)
17:23025566	T	ENSCAFG00000005297	ENSCAFT00000008540	Transcript	missense_variant	4814	3851	1284	G/E	gGa/gAa	-	-	-1	ALK	HGNC	HGNC:427	protein_coding	YES	deleterious(0)
17:23688147	A	ENSCAFG00000005297	ENSCAFT00000008540	Transcript	missense_variant	1636	673	225	R/C	Cgc/Tgc	-	-	-1	ALK	HGNC	HGNC:427	protein_coding	YES	deleterious(0)
17:24415335	T	ENSCAFG00000005318	ENSCAFT00000008568	Transcript	splice_donor_variant	-	-	-	-	-	-	-	-1	CAPN13	HGNC	HGNC:16663	protein_coding	YES	-
17:24853207-24853208	-	ENSCAFG00000005348	ENSCAFT00000008624	Transcript	frameshift_variant,feature_truncation	1501	1501	501	-	-	-	-	1	EHD3	HGNC	HGNC:3244	protein_coding	YES	-
17:24905315	T	ENSCAFG00000005609	ENSCAFT00000009127	Transcript	splice_acceptor_variant	-	-	-	-	-	-	-	-1	XDH	HGNC	HGNC:12805	protein_coding	YES	-
17:24932061-24932065	-	ENSCAFG00000005609	ENSCAFT00000047701	Transcript	splice_donor_variant,intron_variant,feature_truncation	-	-	-	-	-	-	-	-1	XDH	HGNC	HGNC:12805	protein_coding	-	-
17:24932061-24932065	-	ENSCAFG00000005609	ENSCAFT00000009127	Transcript	splice_donor_variant,intron_variant,feature_truncation	-	-	-	-	-	-	-	-1	XDH	HGNC	HGNC:12805	protein_coding	YES	-
17:25055876	T	ENSCAFG00000032023	ENSCAFT00000049815	Transcript	missense_variant,splice_region_variant	427	281	94	R/K	aGg/aAg	-	-	-1	SRD5A2	HGNC	HGNC:11285	protein_coding	YES	deleterious(0.01)
17:25489642	TATT	ENSCAFG00000005738	ENSCAFT00000009272	Transcript	frameshift_variant,feature_elongation	955-956	955-956	319	-	-	-	-	1	SLC30A6	HGNC	HGNC:19305	protein_coding	YES	-
17:25825364-25825366	-	ENSCAFG00000005775	ENSCAFT00000009352	Transcript	frameshift_variant,feature_truncation	13511-13512	13511-13512	4504	-	-	-	-	1	BIRC6	HGNC	HGNC:13516	protein_coding	YES	-
17:25841087	T	ENSCAFG00000005775	ENSCAFT00000009352	Transcript	missense_variant	14066	14066	4689	S/F	tCc/tTc	-	-	1	BIRC6	HGNC	HGNC:13516	protein_coding	YES	deleterious(0)
17:25869693	T	ENSCAFG00000005816	ENSCAFT00000009391	Transcript	missense_variant	781	553	185	R/W	Agg/Tgg	-	-	1	TTC27	HGNC	HGNC:25986	protein_coding	YES	deleterious(0.01)
17:26393965	A	ENSCAFG00000005843	ENSCAFT00000009448	Transcript	missense_variant	2623	1870	624	A/T	Gcc/Acc	-	-	1	LTBP1	Uniprot_gn	-	protein_coding	YES	deleterious(0.05)
17:26426186	T	ENSCAFG00000005843	ENSCAFT00000009448	Transcript	missense_variant	3452	2699	900	S/F	tCc/tTc	-	-	1	LTBP1	Uniprot_gn	-	protein_coding	YES	deleterious(0)
17:26519460	A	ENSCAFG00000005843	ENSCAFT00000009448	Transcript	missense_variant	5140	4387	1463	E/K	Gaa/Aaa	-	-	1	LTBP1	Uniprot_gn	-	protein_coding	YES	deleterious(0)
17:26640988	A	ENSCAFG00000005870	ENSCAFT00000009462	Transcript	missense_variant	1624	1236	412	D/E	gaC/gaA	-	-	1	RASGRP3	HGNC	HGNC:14545	protein_coding	YES	deleterious(0)
17:28970567-28970569	-	ENSCAFG00000005886	ENSCAFT00000009500	Transcript	frameshift_variant,feature_truncation	1134-1135	1073-1074	358	-	-	-	-	1	CRIM1	HGNC	HGNC:2359	protein_coding	YES	-
17:29071053	G	ENSCAFG00000005904	ENSCAFT00000009524	Transcript	missense_variant	694	694	232	S/P	Tct/Cct	-	-	-1	FEZ2	HGNC	HGNC:3660	protein_coding	YES	deleterious(0)
17:29572950	A	ENSCAFG00000006085	ENSCAFT00000009851	Transcript	missense_variant	2371	2371	791	R/C	Cgt/Tgt	-	-	-1	CEBPZ	HGNC	HGNC:24218	protein_coding	YES	deleterious(0)
17:30277308	C	ENSCAFG00000006164	ENSCAFT00000047464	Transcript	frameshift_variant,feature_elongation	479-480	478-479	160	-	-	-	-	-1	CYP1B1	EntrezGene	-	protein_coding	YES	-
17:30441767	T	ENSCAFG00000006181	ENSCAFT00000023925	Transcript	missense_variant	1487	1487	496	G/D	gGc/gAc	-	-	-1	ATL2	HGNC	HGNC:24047	protein_coding	YES	deleterious(0)
17:30441950	T	ENSCAFG00000006181	ENSCAFT00000023925	Transcript	frameshift_variant,feature_elongation	1303-1304	1303-1304	435	-	-	-	-	-1	ATL2	HGNC	HGNC:24047	protein_coding	YES	-
17:30493683-30493689	-	ENSCAFG00000006181	ENSCAFT00000023925	Transcript	inframe_deletion	61-66	61-66	21-22	RR/-	CGCCGG/-	-	-	-1	ATL2	HGNC	HGNC:24047	protein_coding	YES	-
17:30832202	T	ENSCAFG00000006297	ENSCAFT00000010193	Transcript	missense_variant	853	853	285	P/S	Cca/Tca	-	-	1	-	-	-	protein_coding	YES	deleterious(0)
17:30982569	T	ENSCAFG00000006310	ENSCAFT00000049969	Transcript	missense_variant	1354	1354	452	R/W	Cgg/Tgg	-	-	1	ARHGEF33	HGNC	HGNC:37252	protein_coding	YES	deleterious(0)
17:31235051	T	ENSCAFG00000006354	ENSCAFT00000035709	Transcript	missense_variant	38	38	13	G/E	gGg/gAg	-	-	-1	CDKL4	HGNC	HGNC:19287	protein_coding	YES	deleterious(0)
17:31328352	T	ENSCAFG00000006426	ENSCAFT00000010422	Transcript	missense_variant	316	316	106	G/R	Gga/Aga	-	-	-1	MAP4K3	HGNC	HGNC:6865	protein_coding	YES	deleterious(0)
17:31701482	T	ENSCAFG00000006471	ENSCAFT00000010448	Transcript	missense_variant	1524	1502	501	G/E	gGa/gAa	-	-	-1	THUMPD2	HGNC	HGNC:14890	protein_coding	YES	deleterious(0)
17:31715184	T	ENSCAFG00000006471	ENSCAFT00000010448	Transcript	missense_variant	948	926	309	G/E	gGa/gAa	-	-	-1	THUMPD2	HGNC	HGNC:14890	protein_coding	YES	deleterious(0)
17:33928174	A	ENSCAFG00000006510	ENSCAFT00000010521	Transcript	missense_variant,splice_region_variant	2488	2156	719	G/E	gGa/gAa	-	-	1	EML4	HGNC	HGNC:1316	protein_coding	YES	deleterious(0)
17:34079882	A	ENSCAFG00000006520	ENSCAFT00000010528	Transcript	missense_variant	757	509	170	A/V	gCg/gTg	-	-	-1	KCNG3	HGNC	HGNC:18306	protein_coding	YES	deleterious(0.01)
17:34422038	C	ENSCAFG00000006559	ENSCAFT00000010571	Transcript	missense_variant	1090	1090	364	Y/H	Tac/Cac	-	-	1	ITPRIPL1	HGNC	HGNC:29371	protein_coding	YES	deleterious(0)
17:34695090	A	ENSCAFG00000006842	ENSCAFT00000011010	Transcript	stop_gained	2308	2241	747	W/*	tgG/tgA	-	-	1	GPAT2	HGNC	HGNC:27168	protein_coding	YES	-
17:34915817	A	ENSCAFG00000030377	ENSCAFT00000048125	Transcript	missense_variant	1516	1516	506	G/R	Ggg/Agg	-	-	1	ZNF514	HGNC	HGNC:25894	protein_coding	YES	deleterious(0)
17:34983621	A	ENSCAFG00000007047	ENSCAFT00000011303	Transcript	missense_variant	143	120	40	L/F	ttG/ttT	-	-	-1	MAL	HGNC	HGNC:6817	protein_coding	YES	deleterious(0)
17:35000242	A	ENSCAFG00000007047	ENSCAFT00000011303	Transcript	missense_variant	37	14	5	A/V	gCg/gTg	-	-	-1	MAL	HGNC	HGNC:6817	protein_coding	YES	deleterious(0.01)
17:36199134	A	ENSCAFG00000023277	ENSCAFT00000035694	Transcript	splice_donor_variant	-	-	-	-	-	-	-	1	-	-	-	protein_coding	YES	-
17:36199403	T	ENSCAFG00000023277	ENSCAFT00000035694	Transcript	missense_variant	203	203	68	G/V	gGc/gTc	-	-	1	-	-	-	protein_coding	YES	deleterious(0)
17:36225175	T	ENSCAFG00000007103	ENSCAFT00000011397	Transcript	missense_variant	5357	5357	1786	A/D	gCt/gAt	-	-	-1	ANAPC1	HGNC	HGNC:19988	protein_coding	YES	deleterious(0)
17:36253333	A	ENSCAFG00000007103	ENSCAFT00000011397	Transcript	stop_gained	4069	4069	1357	Q/*	Caa/Taa	-	-	-1	ANAPC1	HGNC	HGNC:19988	protein_coding	YES	-
17:36260020	A	ENSCAFG00000007103	ENSCAFT00000011397	Transcript	missense_variant	3504	3504	1168	K/N	aaG/aaT	-	-	-1	ANAPC1	HGNC	HGNC:19988	protein_coding	YES	deleterious(0)
17:36266940	T	ENSCAFG00000007103	ENSCAFT00000011397	Transcript	missense_variant	3127	3127	1043	V/M	Gtg/Atg	-	-	-1	ANAPC1	HGNC	HGNC:19988	protein_coding	YES	deleterious(0)
17:36713309	A	ENSCAFG00000031118	ENSCAFT00000045348	Transcript	missense_variant	688	527	176	A/V	gCg/gTg	-	-	-1	-	-	-	protein_coding	YES	deleterious(0.02)
17:36779201	A	ENSCAFG00000007174	ENSCAFT00000011494	Transcript	missense_variant	1116	500	167	G/E	gGa/gAa	-	-	1	POLR1B	HGNC	HGNC:20454	protein_coding	YES	deleterious(0)
17:36875728	A	ENSCAFG00000007200	ENSCAFT00000011572	Transcript	missense_variant	1757	1391	464	I/N	aTt/aAt	-	-	1	SLC20A1	HGNC	HGNC:10946	protein_coding	YES	deleterious(0.05)
17:37021817	T	ENSCAFG00000007249	ENSCAFT00000011613	Transcript	missense_variant	911	437	146	G/E	gGg/gAg	-	-	-1	IL1B	Uniprot_gn	-	protein_coding	YES	deleterious(0.04)
17:37924434	A	ENSCAFG00000007383	ENSCAFT00000011840	Transcript	missense_variant	1056	1056	352	S/R	agT/agA	-	-	1	EIF2AK3	HGNC	HGNC:3255	protein_coding	YES	deleterious(0.01)
17:38322162	G	ENSCAFG00000007453	ENSCAFT00000011940	Transcript	missense_variant	725	725	242	M/R	aTg/aGg	-	-	1	KRCC1	HGNC	HGNC:28039	protein_coding	YES	deleterious(0)
17:38335146	T	ENSCAFG00000028877	ENSCAFT00000043462	Transcript	missense_variant	545	545	182	S/F	tCc/tTc	-	-	1	-	-	-	protein_coding	YES	deleterious(0.03)
17:38692673	G	ENSCAFG00000007522	ENSCAFT00000012063	Transcript	missense_variant	3893	3863	1288	H/P	cAt/cCt	-	-	-1	KDM3A	HGNC	HGNC:20815	protein_coding	YES	deleterious(0.01)
17:38993455	C	ENSCAFG00000007584	ENSCAFT00000012138	Transcript	missense_variant	253	209	70	V/G	gTt/gGt	-	-	-1	PTCD3	HGNC	HGNC:24717	protein_coding	YES	deleterious(0)
17:39028175	GAAGA	ENSCAFG00000007613	ENSCAFT00000012228	Transcript	frameshift_variant,feature_elongation	1746-1747	1746-1747	582-583	-	-	-	-	1	POLR1A	HGNC	HGNC:17264	protein_coding	YES	-
17:39046941	A	ENSCAFG00000007613	ENSCAFT00000012228	Transcript	missense_variant	2432	2432	811	V/E	gTg/gAg	-	-	1	POLR1A	HGNC	HGNC:17264	protein_coding	YES	deleterious(0)
17:39065522	T	ENSCAFG00000007613	ENSCAFT00000012228	Transcript	missense_variant,splice_region_variant	4358	4358	1453	E/V	gAg/gTg	-	-	1	POLR1A	HGNC	HGNC:17264	protein_coding	YES	deleterious(0)
17:39269570	A	ENSCAFG00000007657	ENSCAFT00000012245	Transcript	missense_variant	577	577	193	R/C	Cgc/Tgc	-	-	-1	ATOH8	HGNC	HGNC:24126	protein_coding	YES	deleterious(0)
17:39277632	T	ENSCAFG00000007657	ENSCAFT00000012245	Transcript	missense_variant	235	235	79	D/N	Gat/Aat	-	-	-1	ATOH8	HGNC	HGNC:24126	protein_coding	YES	deleterious(0.05)
17:39424232	A	ENSCAFG00000007658	ENSCAFT00000012253	Transcript	missense_variant	694	694	232	G/S	Ggc/Agc	-	-	1	SFTPB	HGNC	HGNC:10801	protein_coding	YES	deleterious(0)
17:39927578	A	ENSCAFG00000007871	ENSCAFT00000049605	Transcript	stop_gained	457	457	153	R/*	Cga/Tga	-	-	-1	KCMF1	HGNC	HGNC:20589	protein_coding	YES	-
17:39927593	A	ENSCAFG00000007871	ENSCAFT00000049605	Transcript	stop_gained	442	442	148	E/*	Gaa/Taa	-	-	-1	KCMF1	HGNC	HGNC:20589	protein_coding	YES	-
17:40090441	C	ENSCAFG00000007876	ENSCAFT00000049228	Transcript	missense_variant	593	593	198	L/P	cTg/cCg	-	-	1	TRABD2A	HGNC	HGNC:27013	protein_coding	YES	deleterious(0.01)
17:40245693	T	ENSCAFG00000007917	ENSCAFT00000012666	Transcript	missense_variant	6665	6665	2222	R/H	cGc/cAc	-	-	-1	DNAH6	HGNC	HGNC:2951	protein_coding	YES	deleterious(0)
17:40290355	A	ENSCAFG00000007917	ENSCAFT00000012666	Transcript	missense_variant	3226	3226	1076	P/S	Cca/Tca	-	-	-1	DNAH6	HGNC	HGNC:2951	protein_coding	YES	deleterious(0.02)
17:40312282	T	ENSCAFG00000007917	ENSCAFT00000012666	Transcript	missense_variant	1957	1957	653	Q/K	Cag/Aag	-	-	-1	DNAH6	HGNC	HGNC:2951	protein_coding	YES	deleterious(0.01)
17:40326660	T	ENSCAFG00000007917	ENSCAFT00000012666	Transcript	missense_variant	1094	1094	365	R/Q	cGa/cAa	-	-	-1	DNAH6	HGNC	HGNC:2951	protein_coding	YES	deleterious(0.01)
17:44333744	A	ENSCAFG00000008115	ENSCAFT00000012921	Transcript	missense_variant	481	110	37	T/I	aCc/aTc	-	-	-1	CTNNA2	HGNC	HGNC:2510	protein_coding	YES	deleterious(0)
17:47817479-47817494	-	ENSCAFG00000032377	ENSCAFT00000048331	Transcript	inframe_deletion	464-478	340-354	114-118	RERII/-	CGGGAGCGCATCATC/-	-	-	1	EVA1A	HGNC	HGNC:25816	protein_coding	YES	-
17:48251717	T	ENSCAFG00000008186	ENSCAFT00000013014	Transcript	missense_variant	666	322	108	A/T	Gcc/Acc	-	-	-1	POLE4	HGNC	HGNC:18755	protein_coding	YES	deleterious(0)
17:48329375	A	ENSCAFG00000008265	ENSCAFT00000013192	Transcript	missense_variant	170	77	26	T/I	aCc/aTc	-	-	-1	HK2	HGNC	HGNC:4923	protein_coding	YES	deleterious(0.01)
17:48606809	G	ENSCAFG00000008358	ENSCAFT00000013310	Transcript	missense_variant	872	860	287	Y/C	tAc/tGc	-	-	1	LOXL3	HGNC	HGNC:13869	protein_coding	YES	deleterious(0)
17:48613945	T	ENSCAFG00000008402	ENSCAFT00000013349	Transcript	missense_variant	97	97	33	P/S	Ccc/Tcc	-	-	1	AUP1	HGNC	HGNC:891	protein_coding	YES	deleterious(0)
17:48642938	A	ENSCAFG00000029526	ENSCAFT00000042884	Transcript	missense_variant	278	278	93	T/K	aCg/aAg	-	-	1	LBX2	HGNC	HGNC:15525	protein_coding	YES	deleterious(0)
17:48709461	A	ENSCAFG00000008564	ENSCAFT00000013584	Transcript	missense_variant	394	394	132	D/N	Gat/Aat	-	-	1	C2orf81	HGNC	HGNC:34350	protein_coding	YES	deleterious(0.02)
17:48709854	T	ENSCAFG00000008564	ENSCAFT00000013584	Transcript	missense_variant	620	620	207	S/F	tCc/tTc	-	-	1	C2orf81	HGNC	HGNC:34350	protein_coding	YES	deleterious(0.01)
17:48845594	T	ENSCAFG00000008684	ENSCAFT00000013814	Transcript	missense_variant	1151	1151	384	R/L	cGg/cTg	-	-	1	SLC4A5	HGNC	HGNC:18168	protein_coding	YES	deleterious(0)
17:48920901	A	ENSCAFG00000008735	ENSCAFT00000013895	Transcript	missense_variant	428	116	39	G/E	gGg/gAg	-	-	1	MOB1A	HGNC	HGNC:16015	protein_coding	YES	deleterious(0)
17:48983126	A	ENSCAFG00000008728	ENSCAFT00000013873	Transcript	missense_variant	5690	4820	1607	P/L	cCc/cTc	-	-	-1	TET3	HGNC	HGNC:28313	protein_coding	YES	deleterious(0)
17:49287237	T	ENSCAFG00000029185	ENSCAFT00000047203	Transcript	missense_variant	37	37	13	R/W	Cgg/Tgg	-	-	1	NAT8	HGNC	HGNC:18069	protein_coding	YES	deleterious(0)
17:49287598	T	ENSCAFG00000029185	ENSCAFT00000047203	Transcript	missense_variant	398	398	133	T/I	aCc/aTc	-	-	1	NAT8	HGNC	HGNC:18069	protein_coding	YES	deleterious(0.04)
17:49362110	T	ENSCAFG00000008827	ENSCAFT00000014029	Transcript	stop_gained	10112	9378	3126	W/*	tgG/tgA	-	-	-1	ALMS1	HGNC	HGNC:428	protein_coding	YES	-
17:49367980	A	ENSCAFG00000008827	ENSCAFT00000014029	Transcript	missense_variant	9693	8959	2987	P/S	Cca/Tca	-	-	-1	ALMS1	HGNC	HGNC:428	protein_coding	YES	deleterious(0.02)
17:49414196	A	ENSCAFG00000008827	ENSCAFT00000014029	Transcript	missense_variant	8367	7633	2545	P/S	Cca/Tca	-	-	-1	ALMS1	HGNC	HGNC:428	protein_coding	YES	deleterious(0)
17:49414488	A	ENSCAFG00000008827	ENSCAFT00000014029	Transcript	missense_variant	8075	7341	2447	E/D	gaA/gaT	-	-	-1	ALMS1	HGNC	HGNC:428	protein_coding	YES	deleterious(0.01)
17:49576180	G	ENSCAFG00000031530	ENSCAFT00000049259	Transcript	missense_variant	159	92	31	A/G	gCt/gGt	-	-	1	EGR4	HGNC	HGNC:3241	protein_coding	YES	deleterious(0.02)
17:49766111	T	ENSCAFG00000008938	ENSCAFT00000047634	Transcript	missense_variant	3407	3407	1136	S/F	tCt/tTt	-	-	1	RAB11FIP5	HGNC	HGNC:24845	protein_coding	YES	deleterious(0)
17:50352109	T	ENSCAFG00000008981	ENSCAFT00000014289	Transcript	missense_variant	1022	1022	341	S/F	tCt/tTt	-	-	1	EXOC6B	HGNC	HGNC:17085	protein_coding	YES	deleterious(0)
17:51274692	T	ENSCAFG00000009067	ENSCAFT00000014433	Transcript	missense_variant	3357	3047	1016	G/E	gGa/gAa	-	-	-1	ZNF638	HGNC	HGNC:17894	protein_coding	YES	deleterious(0)
17:51581617	C	ENSCAFG00000009241	ENSCAFT00000014688	Transcript	missense_variant	1880	1880	627	D/G	gAt/gGt	-	-	-1	RSBN1	HGNC	HGNC:25642	protein_coding	YES	deleterious(0.01)
17:51639619	T	ENSCAFG00000009255	ENSCAFT00000014707	Transcript	stop_gained	1967	1967	656	W/*	tGg/tAg	-	-	-1	PTPN22	HGNC	HGNC:9652	protein_coding	YES	-
17:51666082	T	ENSCAFG00000009255	ENSCAFT00000014707	Transcript	stop_gained	342	342	114	W/*	tgG/tgA	-	-	-1	PTPN22	HGNC	HGNC:9652	protein_coding	YES	-
17:51779146	C	ENSCAFG00000009298	ENSCAFT00000014801	Transcript	missense_variant	3791	3791	1264	L/P	cTg/cCg	-	-	1	HIPK1	HGNC	HGNC:19006	protein_coding	YES	deleterious(0)
17:51787028	T	ENSCAFG00000009334	ENSCAFT00000014855	Transcript	missense_variant	694	694	232	G/W	Ggg/Tgg	-	-	1	OLFML3	HGNC	HGNC:24956	protein_coding	YES	deleterious(0.02)
17:52138945	A	ENSCAFG00000009442	ENSCAFT00000015037	Transcript	missense_variant	1582	1582	528	P/S	Cca/Tca	-	-	-1	TRIM33	HGNC	HGNC:16290	protein_coding	YES	deleterious(0.04)
17:52382727	T	ENSCAFG00000009521	ENSCAFT00000015139	Transcript	missense_variant	1384	1384	462	G/S	Ggc/Agc	-	-	-1	AMPD1	HGNC	HGNC:468	protein_coding	YES	deleterious(0)
17:52901366	T	ENSCAFG00000009739	ENSCAFT00000015453	Transcript	missense_variant	350	350	117	R/Q	cGa/cAa	-	-	-1	NGFB	Uniprot_gn	-	protein_coding	YES	deleterious(0.02)
17:53194929	T	ENSCAFG00000009758	ENSCAFT00000035308	Transcript	missense_variant	1039	517	173	R/C	Cgc/Tgc	-	-	1	VANGL1	HGNC	HGNC:15512	protein_coding	YES	deleterious(0)
17:53255162	A	ENSCAFG00000009765	ENSCAFT00000015508	Transcript	missense_variant,splice_region_variant	1042	1028	343	P/L	cCc/cTc	-	-	-1	CASQ2	Uniprot_gn	-	protein_coding	YES	deleterious(0)
17:53832568	A	ENSCAFG00000009795	ENSCAFT00000049162	Transcript	missense_variant	966	518	173	G/D	gGt/gAt	-	-	1	ATP1A1	HGNC	HGNC:799	protein_coding	YES	deleterious(0.01)
17:53833644-53833645	-	ENSCAFG00000009795	ENSCAFT00000049162	Transcript	frameshift_variant,feature_truncation	1459	1011	337	-	-	-	-	1	ATP1A1	HGNC	HGNC:799	protein_coding	YES	-
17:53987404	T	ENSCAFG00000009798	ENSCAFT00000015556	Transcript	stop_gained	478	372	124	C/*	tgC/tgA	-	-	-1	CD58	HGNC	HGNC:1688	protein_coding	YES	-
17:53995563-53995564	TT	ENSCAFG00000009798	ENSCAFT00000015556	Transcript	frameshift_variant,feature_elongation	225	119	40	-	-	-	-	-1	CD58	HGNC	HGNC:1688	protein_coding	YES	-
17:53995563-53995564	-	ENSCAFG00000009798	ENSCAFT00000015556	Transcript	frameshift_variant,feature_truncation	225	119	40	-	-	-	-	-1	CD58	HGNC	HGNC:1688	protein_coding	YES	-
17:54043082	A	ENSCAFG00000009811	ENSCAFT00000015585	Transcript	missense_variant	1999	1366	456	R/C	Cgc/Tgc	-	-	-1	IGSF3	HGNC	HGNC:5950	protein_coding	YES	deleterious(0.01)
17:54043094	T	ENSCAFG00000009811	ENSCAFT00000015585	Transcript	missense_variant	1987	1354	452	D/N	Gac/Aac	-	-	-1	IGSF3	HGNC	HGNC:5950	protein_coding	YES	deleterious(0.03)
17:54401775	T	ENSCAFG00000009839	ENSCAFT00000015624	Transcript	missense_variant	635	635	212	P/L	cCc/cTc	-	-	1	CD101	HGNC	HGNC:5949	protein_coding	YES	deleterious(0.02)
17:55197227	A	ENSCAFG00000009886	ENSCAFT00000015722	Transcript	stop_gained	757	757	253	R/*	Cga/Tga	-	-	-1	GDAP2	HGNC	HGNC:18010	protein_coding	YES	-
17:55337774	T	ENSCAFG00000009951	ENSCAFT00000015854	Transcript	missense_variant	4305	3419	1140	G/E	gGa/gAa	-	-	-1	SPAG17	HGNC	HGNC:26620	protein_coding	YES	deleterious(0)
17:55339259-55339263	-	ENSCAFG00000009951	ENSCAFT00000015854	Transcript	frameshift_variant,feature_truncation	4183-4186	3297-3300	1099-1100	-	-	-	-	-1	SPAG17	HGNC	HGNC:26620	protein_coding	YES	-
17:55341316	A	ENSCAFG00000009951	ENSCAFT00000015854	Transcript	missense_variant,splice_region_variant	4051	3165	1055	K/N	aaA/aaT	-	-	-1	SPAG17	HGNC	HGNC:26620	protein_coding	YES	deleterious(0)
17:55366629	C	ENSCAFG00000009951	ENSCAFT00000015854	Transcript	missense_variant	3192	2306	769	D/G	gAc/gGc	-	-	-1	SPAG17	HGNC	HGNC:26620	protein_coding	YES	deleterious(0)
17:55384123	T	ENSCAFG00000009951	ENSCAFT00000015854	Transcript	missense_variant	1982	1096	366	E/K	Gag/Aag	-	-	-1	SPAG17	HGNC	HGNC:26620	protein_coding	YES	deleterious(0.02)
17:55384137	A	ENSCAFG00000009951	ENSCAFT00000015854	Transcript	missense_variant	1968	1082	361	H/L	cAt/cTt	-	-	-1	SPAG17	HGNC	HGNC:26620	protein_coding	YES	deleterious(0)
17:55403154	A	ENSCAFG00000009951	ENSCAFT00000015854	Transcript	stop_gained	1310	424	142	R/*	Cga/Tga	-	-	-1	SPAG17	HGNC	HGNC:26620	protein_coding	YES	-
17:56082145	A	ENSCAFG00000009976	ENSCAFT00000015871	Transcript	missense_variant	2064	1075	359	P/S	Cct/Tct	-	-	-1	TBX15	HGNC	HGNC:11594	protein_coding	YES	deleterious(0.04)
17:56553241	A	ENSCAFG00000010039	ENSCAFT00000015969	Transcript	missense_variant	172	59	20	G/D	gGt/gAt	-	-	1	HSD3B	Uniprot_gn	-	protein_coding	YES	deleterious(0)
17:56560019	AGGCTGTGCT	ENSCAFG00000010039	ENSCAFT00000015969	Transcript	frameshift_variant,feature_elongation	615-616	502-503	168	-	-	-	-	1	HSD3B	Uniprot_gn	-	protein_coding	YES	-
17:56578261-56578359	-	ENSCAFG00000010044	ENSCAFT00000015974	Transcript	frameshift_variant,feature_truncation	474-571	438-535	146-179	-	-	-	-	-1	ZNF697	HGNC	HGNC:32034	protein_coding	YES	-
17:56684433	A	ENSCAFG00000010096	ENSCAFT00000016048	Transcript	frameshift_variant,feature_elongation	1264-1265	1264-1265	422	-	-	-	-	-1	HMGCS2	HGNC	HGNC:5008	protein_coding	YES	-
17:56691641	G	ENSCAFG00000010096	ENSCAFT00000016048	Transcript	missense_variant	225	225	75	K/N	aaG/aaC	-	-	-1	HMGCS2	HGNC	HGNC:5008	protein_coding	YES	deleterious(0.03)
17:56868125	T	ENSCAFG00000010476	ENSCAFT00000016889	Transcript	stop_gained	5367	5367	1789	W/*	tgG/tgA	-	-	-1	NOTCH2	HGNC	HGNC:7882	protein_coding	YES	-
17:56885813	A	ENSCAFG00000010476	ENSCAFT00000016889	Transcript	missense_variant	2815	2815	939	P/S	Cct/Tct	-	-	-1	NOTCH2	HGNC	HGNC:7882	protein_coding	YES	deleterious(0.04)
17:57084004	T	ENSCAFG00000010738	ENSCAFT00000017086	Transcript	missense_variant	1426	685	229	V/I	Gta/Ata	-	-	-1	SEC22B	HGNC	HGNC:10700	protein_coding	YES	deleterious(0)
17:57252003	T	ENSCAFG00000010803	ENSCAFT00000017227	Transcript	missense_variant	434	434	145	A/V	gCt/gTt	-	-	1	PDE4DIP	HGNC	HGNC:15580	protein_coding	YES	deleterious(0)
17:57285850	T	ENSCAFG00000010803	ENSCAFT00000017227	Transcript	missense_variant	1267	1267	423	R/C	Cgt/Tgt	-	-	1	PDE4DIP	HGNC	HGNC:15580	protein_coding	YES	deleterious(0)
17:57667318	A	ENSCAFG00000010883	ENSCAFT00000017328	Transcript	missense_variant	1891	1379	460	A/V	gCa/gTa	-	-	-1	FMO5	HGNC	HGNC:3773	protein_coding	YES	deleterious(0.01)
17:57750978	T	ENSCAFG00000010944	ENSCAFT00000017488	Transcript	missense_variant	371	371	124	S/F	tCc/tTc	-	-	1	CHD1L	HGNC	HGNC:1916	protein_coding	YES	deleterious(0.01)
17:58572540	T	ENSCAFG00000011208	ENSCAFT00000017818	Transcript	missense_variant	817	817	273	P/T	Cca/Aca	-	-	-1	RNF115	HGNC	HGNC:18154	protein_coding	YES	deleterious(0.01)
17:58634659	A	ENSCAFG00000011208	ENSCAFT00000017818	Transcript	missense_variant	137	137	46	P/L	cCc/cTc	-	-	-1	RNF115	HGNC	HGNC:18154	protein_coding	YES	deleterious(0.04)
17:58649187-58649190	-	ENSCAFG00000011285	ENSCAFT00000017933	Transcript	splice_acceptor_variant,coding_sequence_variant,feature_truncation	?-404	?-404	?-135	-	-	-	-	1	NUDT17	HGNC	HGNC:26618	protein_coding	YES	-
17:58670685	T	ENSCAFG00000011331	ENSCAFT00000018011	Transcript	missense_variant	2744	2260	754	E/K	Gaa/Aaa	-	-	-1	ANKRD35	HGNC	HGNC:26323	protein_coding	YES	deleterious(0.02)
17:58676205	A	ENSCAFG00000011331	ENSCAFT00000018011	Transcript	missense_variant	704	220	74	L/F	Ctt/Ttt	-	-	-1	ANKRD35	HGNC	HGNC:26323	protein_coding	YES	deleterious(0)
17:58677076	T	ENSCAFG00000011331	ENSCAFT00000018011	Transcript	missense_variant	588	104	35	R/H	cGc/cAc	-	-	-1	ANKRD35	HGNC	HGNC:26323	protein_coding	YES	deleterious(0)
17:59188022	T	ENSCAFG00000011588	ENSCAFT00000044844	Transcript	stop_gained	588	588	196	W/*	tgG/tgA	-	-	-1	SV2A	HGNC	HGNC:20566	protein_coding	YES	-
17:59233025	A	ENSCAFG00000011671	ENSCAFT00000018535	Transcript	missense_variant	1637	1183	395	P/S	Cct/Tct	-	-	-1	OTUD7B	HGNC	HGNC:16683	protein_coding	YES	deleterious(0)
17:59234179	A	ENSCAFG00000011671	ENSCAFT00000018535	Transcript	missense_variant	1380	926	309	P/L	cCc/cTc	-	-	-1	OTUD7B	HGNC	HGNC:16683	protein_coding	YES	deleterious(0)
17:59411225	T	ENSCAFG00000011742	ENSCAFT00000018653	Transcript	missense_variant	667	667	223	R/W	Cgg/Tgg	-	-	1	PLEKHO1	HGNC	HGNC:24310	protein_coding	YES	deleterious(0)
17:59513440	G	ENSCAFG00000011777	ENSCAFT00000018712	Transcript	missense_variant	983	239	80	V/A	gTc/gCc	-	-	-1	APH1	Uniprot_gn	-	protein_coding	YES	deleterious(0)
17:59871628	C	ENSCAFG00000012075	ENSCAFT00000019166	Transcript	missense_variant	542	542	181	D/G	gAt/gGt	-	-	-1	HORMAD1	HGNC	HGNC:25245	protein_coding	YES	deleterious(0)
17:5988869	C	ENSCAFG00000003323	ENSCAFT00000005337	Transcript	missense_variant	4465	4465	1489	S/G	Agt/Ggt	-	-	-1	KIDINS220	HGNC	HGNC:29508	protein_coding	YES	deleterious(0.01)
17:60114017	A	ENSCAFG00000012349	ENSCAFT00000019621	Transcript	stop_gained	281	281	94	L/*	tTg/tAg	-	-	1	PRUNE	HGNC	HGNC:13420	protein_coding	YES	-
17:60135500	A	ENSCAFG00000023491	ENSCAFT00000036142	Transcript	missense_variant	1030	38	13	L/H	cTc/cAc	-	-	1	C1orf56	HGNC	HGNC:26045	protein_coding	YES	deleterious(0)
17:60414858	G	ENSCAFG00000012675	ENSCAFT00000020133	Transcript	missense_variant	502	502	168	T/P	Acc/Ccc	-	-	-1	SELENBP1	HGNC	HGNC:10719	protein_coding	YES	deleterious(0)
17:6041694	A	ENSCAFG00000003323	ENSCAFT00000005337	Transcript	frameshift_variant,splice_region_variant,feature_elongation	1620-1621	1620-1621	540-541	-	-	-	-	-1	KIDINS220	HGNC	HGNC:29508	protein_coding	YES	-
17:60575240	C	ENSCAFG00000012729	ENSCAFT00000020176	Transcript	missense_variant	3922	2929	977	S/R	Agt/Cgt	-	-	1	CGN	HGNC	HGNC:17429	protein_coding	YES	deleterious(0.01)
17:60816446	A	ENSCAFG00000012869	ENSCAFT00000020415	Transcript	missense_variant	1003	1003	335	R/W	Cgg/Tgg	-	-	-1	LINGO4	HGNC	HGNC:31814	protein_coding	YES	deleterious(0.01)
17:60816469	A	ENSCAFG00000012869	ENSCAFT00000020415	Transcript	missense_variant	980	980	327	A/V	gCg/gTg	-	-	-1	LINGO4	HGNC	HGNC:31814	protein_coding	YES	deleterious(0.03)
17:60816748	A	ENSCAFG00000012869	ENSCAFT00000020415	Transcript	missense_variant	701	701	234	G/V	gGg/gTg	-	-	-1	LINGO4	HGNC	HGNC:31814	protein_coding	YES	deleterious(0)
17:60861909	T	ENSCAFG00000012906	ENSCAFT00000020483	Transcript	missense_variant	382	382	128	E/K	Gag/Aag	-	-	-1	THEM5	HGNC	HGNC:26755	protein_coding	YES	deleterious(0)
17:60924973	GGG	ENSCAFG00000012908	ENSCAFT00000049563	Transcript	inframe_insertion	789-790	118-119	40	Q/PQ	cag/cCCCag	-	-	-1	THEM4	HGNC	HGNC:17947	protein_coding	-	-
17:61078452	T	ENSCAFG00000012944	ENSCAFT00000035159	Transcript	frameshift_variant,feature_elongation	2209-2210	2209-2210	737	-	-	-	-	-1	TCHHL1	HGNC	HGNC:31796	protein_coding	YES	-
17:61099812-61099814	-	ENSCAFG00000030077	ENSCAFT00000043601	Transcript	frameshift_variant,feature_truncation	1029-1030	701-702	234	-	-	-	-	-1	TCHH	HGNC	HGNC:11791	protein_coding	YES	-
17:61543567	T	ENSCAFG00000030778	ENSCAFT00000046718	Transcript	missense_variant	544	544	182	P/S	Ccc/Tcc	-	-	1	C1orf68	HGNC	HGNC:29468	protein_coding	YES	deleterious(0)
17:62058368	T	ENSCAFG00000013122	ENSCAFT00000020871	Transcript	missense_variant	3484	3484	1162	D/N	Gac/Aac	-	-	-1	MAGI3	HGNC	HGNC:29647	protein_coding	YES	deleterious(0.03)
17:62098897	T	ENSCAFG00000013122	ENSCAFT00000020871	Transcript	missense_variant	1468	1468	490	A/T	Gcg/Acg	-	-	-1	MAGI3	HGNC	HGNC:29647	protein_coding	YES	deleterious(0.01)
17:62493049	T	ENSCAFG00000013347	ENSCAFT00000047222	Transcript	stop_gained	3018	3018	1006	W/*	tgG/tgA	-	-	-1	LRIG2	HGNC	HGNC:20889	protein_coding	YES	-
17:62497574	T	ENSCAFG00000013347	ENSCAFT00000047222	Transcript	missense_variant	2627	2627	876	G/D	gGc/gAc	-	-	-1	LRIG2	HGNC	HGNC:20889	protein_coding	YES	deleterious(0.01)
17:62512934	T	ENSCAFG00000013347	ENSCAFT00000047222	Transcript	missense_variant	1169	1169	390	G/E	gGa/gAa	-	-	-1	LRIG2	HGNC	HGNC:20889	protein_coding	YES	deleterious(0)
17:62517221	C	ENSCAFG00000013347	ENSCAFT00000047222	Transcript	missense_variant	625	625	209	S/G	Agc/Ggc	-	-	-1	LRIG2	HGNC	HGNC:20889	protein_coding	YES	deleterious(0.02)
17:63478434	A	ENSCAFG00000013665	ENSCAFT00000021670	Transcript	missense_variant	1351	694	232	A/T	Gcc/Acc	-	-	1	KCND3	HGNC	HGNC:6239	protein_coding	YES	deleterious(0.01)
17:63682700	C	ENSCAFG00000013674	ENSCAFT00000021679	Transcript	missense_variant	1021	1021	341	I/V	Att/Gtt	-	-	-1	DDX20	HGNC	HGNC:2743	protein_coding	YES	deleterious(0.02)
17:63976851	G	ENSCAFG00000013729	ENSCAFT00000021783	Transcript	missense_variant	898	898	300	Y/D	Tat/Gat	-	-	1	OVGP1	HGNC	HGNC:8524	protein_coding	YES	deleterious(0)
17:6590664	A	ENSCAFG00000003383	ENSCAFT00000005426	Transcript	stop_gained	2284	2284	762	Q/*	Cag/Tag	-	-	-1	ADAM17	HGNC	HGNC:195	protein_coding	YES	-
17:761482	A	ENSCAFG00000003214	ENSCAFT00000005158	Transcript	stop_gained	1176	1176	392	W/*	tgG/tgA	-	-	1	SNTG2	HGNC	HGNC:13741	protein_coding	YES	-
17:7653177	A	ENSCAFG00000003464	ENSCAFT00000005583	Transcript	missense_variant	1234	1234	412	D/N	Gac/Aac	-	-	1	ATP6V1C2	HGNC	HGNC:18264	protein_coding	YES	deleterious(0)
17:7660969	A	ENSCAFG00000003477	ENSCAFT00000037603	Transcript	missense_variant	667	526	176	D/Y	Gat/Tat	-	-	-1	-	-	-	protein_coding	YES	deleterious(0.01)
17:7941822-7941863	-	ENSCAFG00000003549	ENSCAFT00000005709	Transcript	splice_acceptor_variant,coding_sequence_variant,3_prime_UTR_variant,intron_variant,feature_truncation	?-4041	-	-	-	-	-	-	-1	ROCK2	HGNC	HGNC:10252	protein_coding	YES	-
17:806634	T	ENSCAFG00000003217	ENSCAFT00000005172	Transcript	missense_variant	2743	2621	874	T/I	aCc/aTc	-	-	1	TPO	Uniprot_gn	-	protein_coding	YES	deleterious(0)
17:809003-809004	-	ENSCAFG00000003217	ENSCAFT00000005172	Transcript	frameshift_variant,feature_truncation	2821	2699	900	-	-	-	-	1	TPO	Uniprot_gn	-	protein_coding	YES	-
17:8257752	T	ENSCAFG00000003579	ENSCAFT00000005749	Transcript	missense_variant	250	250	84	P/S	Cca/Tca	-	-	1	GREB1	HGNC	HGNC:24885	protein_coding	YES	deleterious(0.05)
17:8312028	T	ENSCAFG00000003579	ENSCAFT00000005749	Transcript	missense_variant	4360	4360	1454	R/W	Cgg/Tgg	-	-	1	GREB1	HGNC	HGNC:24885	protein_coding	YES	deleterious(0)
17:8318118	T	ENSCAFG00000003579	ENSCAFT00000005749	Transcript	stop_gained	5005	5005	1669	K/*	Aaa/Taa	-	-	1	GREB1	HGNC	HGNC:24885	protein_coding	YES	-
17:8318119	T	ENSCAFG00000003579	ENSCAFT00000005749	Transcript	missense_variant	5006	5006	1669	K/I	aAa/aTa	-	-	1	GREB1	HGNC	HGNC:24885	protein_coding	YES	deleterious(0.01)
17:851247	T	ENSCAFG00000003228	ENSCAFT00000005177	Transcript	missense_variant	1844	1844	615	T/K	aCg/aAg	-	-	-1	PXDN	HGNC	HGNC:14966	protein_coding	YES	deleterious(0)
17:89911	T	ENSCAFG00000025168	ENSCAFT00000039016	Transcript	missense_variant	983	983	328	G/E	gGg/gAg	-	-	-1	FAM110C	HGNC	HGNC:33340	protein_coding	YES	deleterious(0)
17:9946052	T	ENSCAFG00000003635	ENSCAFT00000005850	Transcript	missense_variant	659	659	220	K/I	aAa/aTa	-	-	1	-	-	-	protein_coding	YES	deleterious(0)
18:10137056	A	ENSCAFG00000003569	ENSCAFT00000005734	Transcript	missense_variant	932	290	97	S/L	tCg/tTg	-	-	-1	YAE1D1	HGNC	HGNC:24857	protein_coding	YES	deleterious(0)
18:10945202	A	ENSCAFG00000003582	ENSCAFT00000005763	Transcript	missense_variant	2207	2186	729	R/H	cGt/cAt	-	-	1	VPS41	HGNC	HGNC:12713	protein_coding	YES	deleterious(0)
18:12417383	T	ENSCAFG00000003720	ENSCAFT00000049502	Transcript	missense_variant	727	727	243	P/S	Cca/Tca	-	-	1	NRCAM	HGNC	HGNC:7994	protein_coding	YES	deleterious(0)
18:12429514	T	ENSCAFG00000003720	ENSCAFT00000049502	Transcript	missense_variant	1238	1238	413	A/V	gCa/gTa	-	-	1	NRCAM	HGNC	HGNC:7994	protein_coding	YES	deleterious(0)
18:12567095	A	ENSCAFG00000003786	ENSCAFT00000006090	Transcript	splice_donor_variant	-	-	-	-	-	-	-	1	LAMB4	HGNC	HGNC:6491	protein_coding	YES	-
18:12568731	A	ENSCAFG00000003786	ENSCAFT00000006090	Transcript	missense_variant	2531	2531	844	G/D	gGc/gAc	-	-	1	LAMB4	HGNC	HGNC:6491	protein_coding	YES	deleterious(0)
18:12647841	G	ENSCAFG00000025057	ENSCAFT00000006148	Transcript	missense_variant	601	403	135	F/V	Ttc/Gtc	-	-	1	LAMB1	HGNC	HGNC:6486	protein_coding	YES	deleterious(0)
18:13011912-13011913	-	ENSCAFG00000003912	ENSCAFT00000006288	Transcript	frameshift_variant,feature_truncation	326	326	109	-	-	-	-	-1	BCAP29	HGNC	HGNC:24131	protein_coding	YES	-
18:13349536-13349537	-	ENSCAFG00000003939	ENSCAFT00000006332	Transcript	frameshift_variant,feature_truncation	1077	1077	359	-	-	-	-	-1	HBP1	HGNC	HGNC:23200	protein_coding	YES	-
18:14445086	A	ENSCAFG00000004007	ENSCAFT00000006418	Transcript	missense_variant	2159	2159	720	S/F	tCc/tTc	-	-	-1	CDHR3	HGNC	HGNC:26308	protein_coding	YES	deleterious(0)
18:14488425	A	ENSCAFG00000004007	ENSCAFT00000006418	Transcript	missense_variant	99	99	33	E/D	gaG/gaT	-	-	-1	CDHR3	HGNC	HGNC:26308	protein_coding	YES	deleterious(0.01)
18:1464623-1464624	-	ENSCAFG00000003358	ENSCAFT00000005385	Transcript	frameshift_variant,feature_truncation	216	216	72	-	-	-	-	1	-	-	-	protein_coding	YES	-
18:14811506-14811507	-	ENSCAFG00000004012	ENSCAFT00000049388	Transcript	frameshift_variant,feature_truncation	2045	2045	682	-	-	-	-	1	ATXN7L1	HGNC	HGNC:22210	protein_coding	YES	-
18:15241731	G	ENSCAFG00000004125	ENSCAFT00000006640	Transcript	frameshift_variant,feature_elongation	3263-3264	3263-3264	1088	-	-	-	-	-1	KMT2E	HGNC	HGNC:18541	protein_coding	YES	-
18:16848279-16848284	-	ENSCAFG00000004204	ENSCAFT00000006754	Transcript	frameshift_variant,feature_truncation	814-818	814-818	272-273	-	-	-	-	-1	PSMC2	HGNC	HGNC:9548	protein_coding	YES	-
18:16849207-16849209	-	ENSCAFG00000004204	ENSCAFT00000006754	Transcript	frameshift_variant,feature_truncation	675-676	675-676	225-226	-	-	-	-	-1	PSMC2	HGNC	HGNC:9548	protein_coding	YES	-
18:16889838	T	ENSCAFG00000004235	ENSCAFT00000006800	Transcript	stop_gained	1318	1318	440	R/*	Cga/Tga	-	-	1	DNAJC2	HGNC	HGNC:13192	protein_coding	YES	-
18:16894362	A	ENSCAFG00000004166	ENSCAFT00000006689	Transcript	missense_variant	1534	1534	512	R/C	Cgt/Tgt	-	-	-1	PMPCB	HGNC	HGNC:9119	protein_coding	YES	deleterious(0)
18:16987614-16987619	-	ENSCAFG00000004244	ENSCAFT00000006810	Transcript	frameshift_variant,feature_truncation	646-650	633-637	211-213	-	-	-	-	1	NAPEPLD	HGNC	HGNC:21683	protein_coding	YES	-
18:16990235-16990238	-	ENSCAFG00000004244	ENSCAFT00000006810	Transcript	inframe_deletion	985-987	972-974	324-325	PE/P	ccAGAa/cca	-	-	1	NAPEPLD	HGNC	HGNC:21683	protein_coding	YES	-
18:17419316	T	ENSCAFG00000004316	ENSCAFT00000006926	Transcript	missense_variant	1723	1723	575	V/M	Gtg/Atg	-	-	-1	GSAP	HGNC	HGNC:28042	protein_coding	YES	deleterious(0)
18:17608183-17608184	-	ENSCAFG00000032323	ENSCAFT00000048150	Transcript	frameshift_variant,feature_truncation	414	414	138	-	-	-	-	-1	-	-	-	protein_coding	YES	-
18:1994846	A	ENSCAFG00000003422	ENSCAFT00000005505	Transcript	missense_variant	232	41	14	P/L	cCg/cTg	-	-	-1	GRB10	HGNC	HGNC:4564	protein_coding	YES	deleterious(0)
18:20179112	A	ENSCAFG00000013680	ENSCAFT00000021691	Transcript	stop_gained	808	808	270	K/*	Aaa/Taa	-	-	-1	GNAT3	HGNC	HGNC:22800	protein_coding	YES	-
18:20530939	C	ENSCAFG00000006381	ENSCAFT00000010317	Transcript	missense_variant	647	608	203	T/S	aCc/aGc	-	-	-1	SEMA3C	HGNC	HGNC:10725	protein_coding	YES	deleterious(0.02)
18:207467	A	ENSCAFG00000003334	ENSCAFT00000005349	Transcript	missense_variant	9782	9782	3261	T/K	aCa/aAa	-	-	1	ABCA13	HGNC	HGNC:14638	protein_coding	YES	deleterious(0)
18:21644714	G	ENSCAFG00000006339	ENSCAFT00000010276	Transcript	missense_variant	1006	1006	336	E/Q	Gag/Cag	-	-	-1	CACNA2D1	HGNC	HGNC:1399	protein_coding	YES	deleterious(0.01)
18:22387575	A	ENSCAFG00000006264	ENSCAFT00000010157	Transcript	splice_donor_variant	-	-	-	-	-	-	-	-1	PCLO	HGNC	HGNC:13406	protein_coding	YES	-
18:22920113	A	ENSCAFG00000006247	ENSCAFT00000010102	Transcript	missense_variant	604	571	191	R/C	Cgc/Tgc	-	-	-1	SEMA3E	HGNC	HGNC:10727	protein_coding	YES	deleterious(0)
18:2312998	A	ENSCAFG00000003438	ENSCAFT00000005532	Transcript	stop_gained	1021	1021	341	Q/*	Cag/Tag	-	-	-1	COBL	HGNC	HGNC:22199	protein_coding	YES	-
18:24262531	A	ENSCAFG00000006128	ENSCAFT00000009942	Transcript	stop_gained	2118	1957	653	R/*	Cga/Tga	-	-	-1	SEMA3D	HGNC	HGNC:10726	protein_coding	YES	-
18:24285446-24285447	-	ENSCAFG00000006128	ENSCAFT00000009942	Transcript	frameshift_variant,feature_truncation	1615	1454	485	-	-	-	-	-1	SEMA3D	HGNC	HGNC:10726	protein_coding	YES	-
18:24311142	T	ENSCAFG00000006128	ENSCAFT00000009942	Transcript	missense_variant	1042	881	294	R/H	cGc/cAc	-	-	-1	SEMA3D	HGNC	HGNC:10726	protein_coding	YES	deleterious(0)
18:25436046	A	ENSCAFG00000006468	ENSCAFT00000010444	Transcript	missense_variant	1073	1073	358	R/H	cGt/cAt	-	-	1	NLRP6	HGNC	HGNC:22944	protein_coding	YES	deleterious(0.03)
18:25446436	A	ENSCAFG00000006474	ENSCAFT00000010456	Transcript	missense_variant	1129	1129	377	A/T	Gcc/Acc	-	-	1	ATHL1	HGNC	HGNC:26210	protein_coding	YES	deleterious(0)
18:25602712	A	ENSCAFG00000006515	ENSCAFT00000010519	Transcript	missense_variant	843	650	217	S/N	aGc/aAc	-	-	1	PTDSS2	HGNC	HGNC:15463	protein_coding	YES	deleterious(0)
18:25606862-25606865	-	ENSCAFG00000024796	ENSCAFT00000038320	Transcript	inframe_deletion	633-635	523-525	175	N/-	AAC/-	-	-	-1	RNH1	HGNC	HGNC:10074	protein_coding	YES	-
18:25666204	C	ENSCAFG00000006526	ENSCAFT00000010536	Transcript	missense_variant	893	893	298	S/C	tCt/tGt	-	-	-1	LMNTD2	HGNC	HGNC:28561	protein_coding	YES	deleterious(0.01)
18:25671199	T	ENSCAFG00000006528	ENSCAFT00000010538	Transcript	missense_variant	334	334	112	L/F	Ctc/Ttc	-	-	1	RASSF7	HGNC	HGNC:1166	protein_coding	YES	deleterious(0)
18:25716555	A	ENSCAFG00000006569	ENSCAFT00000010605	Transcript	stop_gained	1540	1540	514	E/*	Gag/Tag	-	-	-1	DEAF1	HGNC	HGNC:14677	protein_coding	YES	-
18:25754562	A	ENSCAFG00000025183	ENSCAFT00000039040	Transcript	missense_variant	1603	1603	535	E/K	Gag/Aag	-	-	1	EPS8L2	HGNC	HGNC:21296	protein_coding	YES	deleterious(0.01)
18:28841565	G	ENSCAFG00000006768	ENSCAFT00000010899	Transcript	missense_variant	402	402	134	N/K	aaT/aaG	-	-	1	LRRC4C	HGNC	HGNC:29317	protein_coding	YES	deleterious(0)
18:302759	A	ENSCAFG00000003334	ENSCAFT00000005349	Transcript	missense_variant	13223	13223	4408	V/E	gTg/gAg	-	-	1	ABCA13	HGNC	HGNC:14638	protein_coding	YES	deleterious(0)
18:31631960	A	ENSCAFG00000006808	ENSCAFT00000010954	Transcript	missense_variant	2705	2705	902	A/V	gCg/gTg	-	-	-1	RAG1	HGNC	HGNC:9831	protein_coding	YES	deleterious(0.03)
18:31632374	T	ENSCAFG00000006808	ENSCAFT00000010954	Transcript	missense_variant	2291	2291	764	R/H	cGc/cAc	-	-	-1	RAG1	HGNC	HGNC:9831	protein_coding	YES	deleterious(0)
18:31709098	G	ENSCAFG00000006825	ENSCAFT00000010974	Transcript	splice_donor_variant	-	-	-	-	-	-	-	-1	PRR5L	HGNC	HGNC:25878	protein_coding	YES	-
18:31729003	TTTTTATTTTATTTTATTTTATTTTATTTTATTTATTTATGATAGT	ENSCAFG00000006825	ENSCAFT00000010974	Transcript	frameshift_variant,feature_elongation	307-308	307-308	103	-	-	-	-	-1	PRR5L	HGNC	HGNC:25878	protein_coding	YES	-
18:31729003	TTTTTATTTTATTTTATTTTATTTTATTTTATTTATTTATGATAGTCA	ENSCAFG00000006825	ENSCAFT00000010974	Transcript	stop_gained,inframe_insertion	307-308	307-308	103	A/VTIINK*NKIK*NKIKT	gca/gTGACTATCATAAATAAATAAAATAAAATAAAATAAAATAAAATAAAAAca	-	-	-1	PRR5L	HGNC	HGNC:25878	protein_coding	YES	-
18:31869360	T	ENSCAFG00000006832	ENSCAFT00000010987	Transcript	missense_variant	727	578	193	S/F	tCc/tTc	-	-	1	COMMD9	HGNC	HGNC:25014	protein_coding	YES	deleterious(0)
18:31903776	A	ENSCAFG00000006840	ENSCAFT00000011003	Transcript	missense_variant	906	725	242	P/L	cCc/cTc	-	-	-1	LDLRAD3	HGNC	HGNC:27046	protein_coding	YES	deleterious(0)
18:31903795	G	ENSCAFG00000006840	ENSCAFT00000011003	Transcript	missense_variant	887	706	236	Y/H	Tac/Cac	-	-	-1	LDLRAD3	HGNC	HGNC:27046	protein_coding	YES	deleterious(0)
18:32392990	C	ENSCAFG00000024167	ENSCAFT00000043784	Transcript	missense_variant	413	413	138	S/C	tCc/tGc	-	-	-1	FJX1	HGNC	HGNC:17166	protein_coding	YES	deleterious(0.02)
18:33614277-33614281	-	ENSCAFG00000006977	ENSCAFT00000011214	Transcript	frameshift_variant,feature_truncation	2032-2035	1585-1588	529-530	-	-	-	-	1	ABTB2	HGNC	HGNC:23842	protein_coding	YES	-
18:34696574	C	ENSCAFG00000007315	ENSCAFT00000011713	Transcript	missense_variant	385	105	35	H/Q	caT/caG	-	-	-1	QSER1	HGNC	HGNC:26154	protein_coding	YES	deleterious(0)
18:34937402-34937406	-	ENSCAFG00000007335	ENSCAFT00000011756	Transcript	frameshift_variant,feature_truncation	1980-1983	1980-1983	660-661	-	-	-	-	1	CCDC73	HGNC	HGNC:23261	protein_coding	YES	-
18:35374212	G	ENSCAFG00000007455	ENSCAFT00000039726	Transcript	missense_variant	1136	735	245	E/D	gaA/gaC	-	-	-1	RCN1	HGNC	HGNC:9934	protein_coding	YES	deleterious(0)
18:35944184	T	ENSCAFG00000007514	ENSCAFT00000012031	Transcript	missense_variant	738	337	113	P/S	Cca/Tca	-	-	1	IMMP1L	HGNC	HGNC:26317	protein_coding	YES	deleterious(0.03)
18:36406042	T	ENSCAFG00000007535	ENSCAFT00000012051	Transcript	missense_variant	106	106	36	P/S	Cca/Tca	-	-	1	-	-	-	protein_coding	YES	deleterious(0.02)
18:36427999	A	ENSCAFG00000007535	ENSCAFT00000012051	Transcript	missense_variant	752	752	251	G/E	gGg/gAg	-	-	1	-	-	-	protein_coding	YES	deleterious(0.03)
18:36448793	G	ENSCAFG00000007535	ENSCAFT00000012051	Transcript	missense_variant	1793	1793	598	D/G	gAc/gGc	-	-	1	-	-	-	protein_coding	YES	deleterious(0.01)
18:37037725	A	ENSCAFG00000007556	ENSCAFT00000039281	Transcript	missense_variant	401	401	134	A/V	gCc/gTc	-	-	-1	-	-	-	protein_coding	YES	deleterious(0)
18:37099860-37099862	-	ENSCAFG00000007565	ENSCAFT00000012113	Transcript	frameshift_variant,feature_truncation	297-298	297-298	99-100	-	-	-	-	1	-	-	-	protein_coding	YES	-
18:37235932	T	ENSCAFG00000031594	ENSCAFT00000012189	Transcript	stop_gained	630	630	210	W/*	tgG/tgA	-	-	-1	OR4D11	HGNC	HGNC:15174	protein_coding	YES	-
18:37275916-37275918	-	ENSCAFG00000031533	ENSCAFT00000045103	Transcript	frameshift_variant,feature_truncation	104-105	104-105	35	-	-	-	-	-1	OR4D6	HGNC	HGNC:15175	protein_coding	YES	-
18:37290820-37290821	-	ENSCAFG00000007632	ENSCAFT00000012213	Transcript	frameshift_variant,feature_truncation	754	754	252	-	-	-	-	-1	OR5A1	HGNC	HGNC:8319	protein_coding	YES	-
18:37532633	G	ENSCAFG00000007649	ENSCAFT00000012229	Transcript	missense_variant	1602	1602	534	C/W	tgT/tgG	-	-	1	MPEG1	HGNC	HGNC:29619	protein_coding	YES	deleterious(0)
18:37562277	A	ENSCAFG00000007651	ENSCAFT00000012238	Transcript	missense_variant	598	598	200	R/W	Cgg/Tgg	-	-	-1	DTX4	HGNC	HGNC:29151	protein_coding	YES	deleterious(0.02)
18:37588365	A	ENSCAFG00000031248	ENSCAFT00000048612	Transcript	stop_gained	2326	1480	494	G/*	Gga/Tga	-	-	-1	FAM111A	HGNC	HGNC:24725	protein_coding	YES	-
18:37589764	A	ENSCAFG00000031248	ENSCAFT00000048612	Transcript	splice_acceptor_variant	-	-	-	-	-	-	-	-1	FAM111A	HGNC	HGNC:24725	protein_coding	YES	-
18:37765562	A	ENSCAFG00000007675	ENSCAFT00000012301	Transcript	missense_variant,splice_region_variant	1585	1585	529	R/W	Cgg/Tgg	-	-	-1	-	-	-	protein_coding	YES	deleterious(0)
18:37836755	A	ENSCAFG00000007693	ENSCAFT00000012313	Transcript	missense_variant	604	604	202	D/N	Gac/Aac	-	-	1	LPXN	HGNC	HGNC:14061	protein_coding	YES	deleterious(0.01)
18:37846721	T	ENSCAFG00000007693	ENSCAFT00000012313	Transcript	missense_variant	935	935	312	D/V	gAt/gTt	-	-	1	LPXN	HGNC	HGNC:14061	protein_coding	YES	deleterious(0)
18:38128190-38128191	-	ENSCAFG00000025503	ENSCAFT00000039659	Transcript	frameshift_variant,feature_truncation	860	860	287	-	-	-	-	1	-	-	-	protein_coding	YES	-
18:38240717	G	ENSCAFG00000007729	ENSCAFT00000012363	Transcript	missense_variant	409	409	137	N/D	Aat/Gat	-	-	1	OR9I1	HGNC	HGNC:14718	protein_coding	YES	deleterious(0.01)
18:38240763	A	ENSCAFG00000007729	ENSCAFT00000012363	Transcript	missense_variant	455	455	152	G/E	gGg/gAg	-	-	1	OR9I1	HGNC	HGNC:14718	protein_coding	YES	deleterious(0)
18:38240822	T	ENSCAFG00000007729	ENSCAFT00000012363	Transcript	missense_variant	514	514	172	N/Y	Aat/Tat	-	-	1	OR9I1	HGNC	HGNC:14718	protein_coding	YES	deleterious(0)
18:38241066	A	ENSCAFG00000007729	ENSCAFT00000012363	Transcript	missense_variant	758	758	253	G/E	gGg/gAg	-	-	1	OR9I1	HGNC	HGNC:14718	protein_coding	YES	deleterious(0)
[truncated: 7,120 more rows]

## Sheet: Table S3
Table S3. Number of variants after filtration steps for putative inherited and somatic varaints.
CTVT Whole Genome Filtration - Putative Somatic Variants
		SNV	Indel	SV
Raw Variants		8623150	3683400	1531180
High-Confidence Variants		5968359	2530786	24246
Found in Both Tumors		3728916	1435051	8903
Not Found in 186 Canids		910376	113026	7338
Not in Repetitive Region		605685	63747	-
Genic		223837	25585	2,329
Coding Sequence		15394	1035	2,329
Protein-Changing		10733	1035	2,329
Moderate Impact		5019	285	-
High Impact		600	741	2,329
Moderate-Impact = Missense deleterious SNVs, in-frame indels, and splice-site altering variants
High-Impact = Truncating variants and SVs that span at least one exon
CTVT Whole Genome Filtration - Putative Inherited Variants
		SNV	Indel	SV
Raw Variants		8623150	3683400	1531180
High-Confidence Variants		5968359	2530786	24246
Found in Both Tumors		3728916	1435051	8903
Found in 186 Canids		2818720	1322025	1565

## Sheet: Table S4
Table S4. Canine genes enriched for nonsynonymous candidate somatic SNVs, when compared to a panel of 20 high-coverage genomes from the VSEC.
						CTVTgrm		CTVTsom		AfghanHnd		Beagle		Belg.Terv.		Bloodhound		Bulldog		Chow Chow		Flatcoated		Eng Mastiff		Sheltie		Germ.Shep		GreatDane		Pekingese		Rottweiler		Scottie		StBernard		Saluki		ToyPoodle		Husky		Wolf		Canid	Canid
Ensembl ID	Chr	Position	GeneName	GeneType	GeneStatus	N	S	N	S	N	S	N	S	N	S	N	S	N	S	N	S	N	S	N	S	N	S	N	S	N	S	N	S	N	S	N	S	N	S	N	S	N	S	N	S	N	S	Avg N	Avg S
ENSCAFG00000006248	20	16789572	CHL1	protein_coding	KNOWN_BY_PROJECTION	0	0	18	0	3	3	0	0	3	6	3	0	3	3	3	0	0	3	3	0	3	0	3	0	3	3	3	0	3	0	3	3	3	0	6	3	3	3	3	0	3	6	2.84211	1.73684
ENSCAFG00000015982	7	37775079	CDC42BPA	protein_coding	KNOWN_BY_PROJECTION	2	2	14	0	0	0	6	0	0	0	0	0	0	0	0	0	2	0	2	0	3	0	0	0	0	0	0	0	2	0	3	0	5	0	0	0	0	0	0	0	0	0	1.21053	0
ENSCAFG00000030746	1	60586582		protein_coding	NOVEL	42	10	12	0	0	0	0	0	0	0	0	0	0	0	0	0	0	0	0	0	0	0	0	0	0	0	0	0	0	0	0	0	0	0	0	0	0	0	0	0	0	0	0	0
ENSCAFG00000018695	4	71579120	NIPBL	protein_coding	KNOWN_BY_PROJECTION	4	4	12	0	12	12	8	8	0	12	0	12	2	8	0	8	0	8	0	8	0	8	0	8	0	12	0	12	0	12	0	8	0	12	0	8	0	12	0	8	0	12	1.15789	9.89474
ENSCAFG00000003120	15	3360563	MACF1	protein_coding	KNOWN_BY_PROJECTION	14	12	12	0	6	6	4	2	4	0	0	0	2	2	2	4	2	8	4	14	2	2	2	2	2	2	2	0	2	2	2	2	2	2	2	4	2	2	2	2	0	0	2.31579	2.94737
ENSCAFG00000018612	4	68528321	CARD6	protein_coding	KNOWN_BY_PROJECTION	13	6	12	0	20	12	24	12	10	17	12	12	9	12	12	12	9	14	12	17	0	0	10	15	12	17	9	14	12	17	15	12	10	15	12	17	9	12	12	15	14	12	11.7368	13.3684
ENSCAFG00000007418	25	18614497	RNF17	protein_coding	KNOWN_BY_PROJECTION	0	0	12	0	0	0	0	0	0	0	0	0	0	0	0	0	0	0	0	0	0	0	3	0	0	0	0	0	0	0	0	0	0	0	0	0	0	0	0	0	0	3	0.157895	0.157895
ENSCAFG00000009331	29	39404411	DPY19L4	protein_coding	KNOWN_BY_PROJECTION	0	0	11	0	0	0	0	0	0	0	0	0	0	0	0	0	0	0	0	0	0	3	0	3	0	0	0	0	0	3	0	0	0	0	0	0	0	0	0	3	0	0	0	0.631579
ENSCAFG00000014773	2	77269071	HSPG2	protein_coding	KNOWN_BY_PROJECTION	37	29	11	0	41	27	8	2	6	2	22	62	10	25	14	60	19	15	16	47	9	48	10	2	8	18	8	18	6	5	6	27	6	2	8	6	16	43	8	62	8	9	12.0526	25.2632
ENSCAFG00000005549	21	24127598	UCP3	protein_coding	KNOWN	2	2	11	0	0	0	0	0	2	0	2	6	2	0	0	6	6	4	4	4	2	6	3	2	4	6	1	2	2	6	8	4	4	6	2	8	4	6	0	4	3	2	2.57895	3.78947
ENSCAFG00000019985	6	47425307	COL11A1	protein_coding	KNOWN_BY_PROJECTION	12	12	30	3	0	0	12	12	0	12	0	0	0	0	0	15	3	12	0	0	0	0	0	0	0	12	0	3	0	0	0	9	0	12	0	12	0	0	0	12	0	9	0.789474	6.31579
ENSCAFG00000012691	5	15217348	KMT2A	protein_coding	KNOWN_BY_PROJECTION	6	6	10	1	3	3	2	2	0	5	1	3	0	2	0	4	0	3	1	4	1	3	0	3	2	3	0	5	0	3	0	4	0	3	1	3	0	3	0	5	0	5	0.578947	3.47368
ENSCAFG00000008656	18	42290125	MADD	protein_coding	KNOWN_BY_PROJECTION	0	0	10	0	2	2	0	0	4	2	0	2	0	0	0	2	0	0	0	2	0	4	0	2	0	2	0	2	0	2	0	2	0	2	0	0	0	2	0	2	0	2	0.315789	1.68421
ENSCAFG00000016944	7	42059263	ASH1L	protein_coding	KNOWN_BY_PROJECTION	0	0	10	0	0	0	0	0	0	0	0	0	0	0	0	0	0	0	0	0	0	0	2	0	0	0	0	0	0	0	0	0	0	0	0	0	0	0	2	0	0	0	0.210526	0
ENSCAFG00000001690	1	82087965	PCSK5	protein_coding	KNOWN_BY_PROJECTION	9	3	11	0	20	9	23	9	11	6	11	15	11	6	11	12	11	9	14	0	12	9	8	9	8	9	3	21	11	15	14	6	11	9	9	6	14	9	5	3	9	15	11.3684	9.31579
ENSCAFG00000006044	25	2981692	TRPC4	protein_coding	KNOWN_BY_PROJECTION	0	0	10	0	0	0	0	0	0	0	0	0	0	0	0	2	0	0	0	0	0	0	0	0	0	0	0	0	0	0	0	0	0	0	2	0	0	0	0	2	0	2	0.105263	0.315789
ENSCAFG00000005133	1	113122820	LTBP4	protein_coding	KNOWN_BY_PROJECTION	0	0	10	0	24	18	7	6	6	8	4	10	8	16	12	16	6	8	10	14	0	6	7	8	2	6	2	0	0	0	10	14	0	4	0	8	2	6	10	14	8	14	6.21053	9.26316
ENSCAFG00000006470	21	29807766	DNHD1	protein_coding	KNOWN_BY_PROJECTION	11	7	10	1	0	0	0	0	4	5	0	0	0	1	7	7	0	0	0	1	4	6	4	6	0	1	3	4	0	0	6	11	1	0	4	6	7	8	8	8	11	6	3.10526	3.68421
ENSCAFG00000014338	18	52439604	NRXN2	protein_coding	KNOWN_BY_PROJECTION	2	2	10	0	6	4	0	0	0	0	0	0	2	4	0	0	0	0	0	0	2	2	0	0	0	0	4	0	0	0	0	0	0	0	0	0	0	0	0	2	0	2	0.736842	0.736842
ENSCAFG00000016823	8	46589325		protein_coding	NOVEL	9	1	11	0	10	3	5	3	6	0	4	0	2	3	6	7	8	2	8	5	4	3	6	5	6	5	4	0	3	0	2	3	7	5	9	5	8	5	8	0	4	1	5.78947	2.89474
ENSCAFG00000023620	7	27686004	FMO6P	protein_coding	KNOWN_BY_PROJECTION	3	3	10	0	5	3	5	3	2	3	2	0	2	3	6	0	4	3	2	3	1	3	4	0	2	3	2	3	2	6	2	3	4	0	2	6	2	3	2	6	5	0	2.94737	2.68421
ENSCAFG00000001751	1	83333499	TRPM6	protein_coding	KNOWN_BY_PROJECTION	2	2	9	0	1	0	4	4	0	4	0	0	0	0	0	13	1	0	1	9	0	0	1	7	0	2	0	0	0	2	2	12	1	11	0	0	1	2	0	0	6	15	0.947368	4.26316
ENSCAFG00000018531	7	70078037	DLGAP1	protein_coding	KNOWN_BY_PROJECTION	4	2	9	1	2	2	2	2	0	2	0	1	0	1	2	2	0	2	0	1	0	1	0	1	0	1	0	1	0	1	0	1	0	1	0	2	0	2	2	2	0	3	0.421053	1.52632
ENSCAFG00000005048	17	21389530	IFT172	protein_coding	KNOWN_BY_PROJECTION	0	0	9	1	1	1	2	2	0	1	0	1	1	0	1	0	0	1	0	1	0	1	0	1	0	1	0	1	0	2	0	1	0	2	1	2	1	0	0	1	1	3	0.421053	1.15789
ENSCAFG00000013844	5	19898787	NCAM1	protein_coding	KNOWN_BY_PROJECTION	3	2	9	0	11	11	9	8	1	8	1	2	1	8	3	5	1	2	1	2	1	2	1	2	1	5	1	2	1	2	1	2	1	2	1	2	1	8	1	8	1	5	2.05263	4.52632
ENSCAFG00000016889	7	41812353	ARHGEF2	protein_coding	KNOWN	0	0	9	0	4	4	5	3	1	3	2	5	1	3	0	2	0	2	2	3	1	5	1	3	2	3	1	3	0	2	2	3	0	2	0	2	2	1	0	0	3	5	1.42105	2.84211
ENSCAFG00000005624	2	34334949	DIP2C	protein_coding	KNOWN_BY_PROJECTION	11	8	9	1	8	6	8	7	2	2	6	7	6	12	6	12	2	11	0	0	6	13	6	5	0	1	6	13	4	7	6	19	4	11	6	13	6	18	6	7	6	6	4.94737	8.94737
ENSCAFG00000001581	11	38372625	ADAMTSL1	protein_coding	KNOWN_BY_PROJECTION	3	2	9	0	5	3	3	2	1	4	0	3	2	3	2	3	0	1	2	2	0	1	2	2	1	2	2	3	3	2	2	3	2	3	0	3	1	1	2	4	1	7	1.63158	2.73684
ENSCAFG00000007103	17	36210284	ANAPC1	protein_coding	KNOWN_BY_PROJECTION	2	2	9	0	0	0	2	0	2	4	0	0	0	0	0	0	0	0	0	0	0	0	0	0	0	0	0	0	0	0	0	0	0	0	0	0	2	2	2	6	2	4	0.526316	0.842105
ENSCAFG00000007867	21	35153041	MICAL2	protein_coding	KNOWN_BY_PROJECTION	13	10	9	0	0	0	0	0	8	13	11	6	5	4	8	11	12	9	12	6	3	10	6	16	10	11	8	17	8	3	12	9	11	16	1	4	0	4	3	4	0	14	6.21053	8.26316
ENSCAFG00000029250	18	9803535	CDK13	protein_coding	KNOWN_BY_PROJECTION	0	0	9	0	0	0	0	0	0	0	0	0	2	1	2	1	0	0	2	1	0	2	0	0	2	3	2	3	0	0	2	1	0	2	3	3	2	3	2	3	0	2	1	1.31579
ENSCAFG00000019683	9	49091641	SNAPC4	protein_coding	KNOWN_BY_PROJECTION	12	7	9	0	16	9	9	7	0	0	2	7	0	0	5	7	7	3	0	0	7	11	0	0	7	11	0	0	4	7	0	0	0	0	2	7	7	0	9	10	0	0	3.94737	4.15789
ENSCAFG00000010031	30	9166254	VPS39	protein_coding	KNOWN_BY_PROJECTION	0	0	8	0	0	0	0	0	0	0	0	0	0	0	0	0	0	0	0	0	0	0	0	0	0	0	0	0	0	0	0	0	0	0	0	0	0	0	0	0	0	0	0	0
ENSCAFG00000011484	25	44317558	GIGYF2	protein_coding	KNOWN_BY_PROJECTION	0	0	8	0	0	0	0	0	0	0	0	0	0	0	0	4	0	4	0	3	0	0	0	0	0	0	0	0	0	3	0	0	0	0	0	0	0	0	0	0	0	0	0	0.736842
ENSCAFG00000005051	23	8278805	SCN5A	protein_coding	KNOWN	4	4	16	2	0	0	0	0	0	8	0	13	1	8	0	6	0	12	0	6	1	12	0	6	0	14	2	8	2	18	0	16	0	14	0	12	2	18	0	12	0	12	0.421053	10.2632
ENSCAFG00000006252	16	29210853	UNC5D	protein_coding	KNOWN_BY_PROJECTION	1	1	8	1	2	2	1	1	0	5	0	0	1	4	0	4	1	3	0	2	0	3	0	3	0	3	0	2	0	2	0	1	0	4	0	4	0	4	0	4	0	4	0.263158	2.89474
ENSCAFG00000001027	13	22036485	FAM91A1	protein_coding	KNOWN_BY_PROJECTION	2	0	8	0	0	0	0	0	0	0	0	0	0	0	0	0	0	0	2	0	0	0	0	0	0	0	0	0	0	0	0	0	0	0	0	0	0	0	0	0	0	0	0.105263	0
ENSCAFG00000008744	3	25985315	RASGRF2	protein_coding	KNOWN_BY_PROJECTION	0	0	8	0	12	12	4	4	0	12	0	8	0	0	0	12	0	0	0	0	0	0	0	0	0	16	0	4	0	12	0	0	0	0	0	4	0	16	0	4	0	16	0.842105	6.31579
ENSCAFG00000019851	6	42609059	KIAA1324	protein_coding	KNOWN_BY_PROJECTION	2	2	8	0	6	6	14	14	0	6	0	6	0	14	0	6	0	8	0	4	0	6	0	8	2	6	0	8	0	6	0	8	0	14	0	14	2	4	0	6	0	6	1.26316	7.89474
ENSCAFG00000010998	3	47101723	CHD2	protein_coding	KNOWN_BY_PROJECTION	0	0	8	0	0	0	0	0	0	0	0	0	0	4	0	4	0	0	0	4	0	0	0	0	0	4	4	0	0	4	0	0	0	0	0	0	0	0	0	0	0	0	0.210526	1.05263
ENSCAFG00000005224	9	3020730	TNRC6C	protein_coding	KNOWN_BY_PROJECTION	9	4	10	0	0	0	9	4	0	0	3	4	0	0	5	2	10	4	10	4	10	4	8	3	0	0	5	4	10	4	10	4	10	4	10	4	0	0	8	4	11	3	6.26316	2.73684
ENSCAFG00000005746	15	20581240	NAV3	protein_coding	KNOWN_BY_PROJECTION	8	8	8	0	4	4	10	4	0	6	2	16	6	6	0	10	0	8	0	4	6	14	6	8	6	6	0	6	0	8	0	8	4	8	0	20	8	10	0	8	0	10	2.73684	8.63158
ENSCAFG00000011665	4	7024621	SIPA1L2	protein_coding	KNOWN_BY_PROJECTION	14	6	8	0	6	6	12	6	2	6	0	6	0	4	2	14	2	2	0	4	0	4	0	4	0	10	0	4	2	6	0	4	2	6	0	4	2	4	4	10	2	8	1.89474	5.89474
ENSCAFG00000007907	15	48274958	LRBA	protein_coding	KNOWN_BY_PROJECTION	0	0	9	0	10	4	12	4	10	8	6	3	6	4	2	3	6	3	2	1	8	2	2	5	4	4	4	7	0	0	4	4	8	2	6	6	4	4	2	2	2	5	5.15789	3.73684
ENSCAFG00000001977	14	18070116	PEX1	protein_coding	KNOWN_BY_PROJECTION	2	0	9	0	2	0	5	3	2	0	2	0	2	0	2	3	2	3	2	0	2	3	2	3	2	3	2	3	2	0	2	0	2	0	2	0	2	3	2	0	2	3	2.15789	1.42105
ENSCAFG00000024030	38	23328183	CD1D	protein_coding	KNOWN	12	1	13	1	12	1	12	1	10	1	9	1	8	1	5	2	13	3	14	3	27	5	35	6	14	3	19	4	30	6	31	5	38	6	13	2	25	5	15	4	8	2	17.7895	3.21053
ENSCAFG00000009993	5	4652441	ST14	protein_coding	KNOWN_BY_PROJECTION	8	7	8	0	6	6	10	7	2	0	0	6	3	7	5	7	0	4	3	9	0	0	0	6	3	1	3	7	0	0	3	1	0	0	3	1	4	4	3	9	0	4	2.52632	4.15789
ENSCAFG00000008092	31	11855900	NRIP1	protein_coding	KNOWN_BY_PROJECTION	8	1	9	1	8	1	8	1	5	3	5	2	5	4	8	6	16	10	15	11	16	10	15	11	16	11	8	6	13	9	7	5	11	8	8	7	8	6	9	4	8	2	9.94737	6.15789
ENSCAFG00000006046	23	27596435	COL6A5	protein_coding	KNOWN_BY_PROJECTION	8	4	8	0	0	0	0	0	2	4	4	6	4	12	12	6	2	2	6	14	2	2	6	8	2	2	2	6	6	4	2	2	0	2	6	14	0	4	4	4	10	10	3.68421	5.36842
ENSCAFG00000014301	7	24042099	TNR	protein_coding	KNOWN_BY_PROJECTION	7	4	17	2	10	3	7	4	1	0	4	3	4	3	6	4	3	6	5	3	4	3	4	3	4	3	4	3	4	3	3	6	5	3	4	3	4	6	4	4	2	4	4.31579	3.52632
ENSCAFG00000020121	6	55058361	ABCA4	protein_coding	KNOWN	24	18	8	0	35	26	6	6	0	6	9	8	0	2	12	8	6	6	9	8	12	14	6	8	6	12	6	14	0	2	9	6	6	11	15	11	9	11	9	24	12	33	8.78947	11.3684
ENSCAFG00000010395	34	8195983	ADAMTS16	protein_coding	KNOWN_BY_PROJECTION	5	1	9	1	5	1	5	1	6	2	3	2	1	1	7	3	11	5	8	4	12	5	12	5	8	4	7	3	10	6	5	4	10	5	4	3	6	5	3	4	3	3	6.63158	3.47368
ENSCAFG00000001460	11	29100859	PTPRD	protein_coding	NOVEL	0	0	7	1	0	0	0	0	0	0	0	1	0	1	0	0	0	0	0	1	0	1	0	1	0	0	0	0	0	1	0	0	0	1	0	0	0	0	0	1	0	3	0	0.578947
ENSCAFG00000009257	26	12770448	MED13L	protein_coding	KNOWN_BY_PROJECTION	0	0	7	0	0	0	0	0	0	6	0	0	0	0	0	0	0	3	0	0	0	3	0	3	0	0	0	0	0	0	0	0	0	0	0	0	0	2	0	0	0	0	0	0.894737
ENSCAFG00000016296	7	39310613		protein_coding	NOVEL	3	1	9	1	4	1	4	1	3	1	3	1	6	5	9	9	3	1	3	1	5	3	3	0	3	1	3	1	3	1	3	1	3	1	3	1	3	1	9	8	7	2	4.21053	2.10526
ENSCAFG00000012385	3	53406975	BLM	protein_coding	KNOWN_BY_PROJECTION	0	0	8	0	2	0	0	0	2	0	0	0	0	0	2	0	0	0	2	0	0	0	0	0	4	0	0	0	0	0	0	0	2	0	2	0	0	0	0	0	4	0	1.05263	0
ENSCAFG00000007603	20	32394484	FLNB	protein_coding	KNOWN_BY_PROJECTION	6	6	7	1	3	3	0	0	0	3	0	7	0	3	0	4	0	0	0	4	1	3	0	3	1	2	0	4	0	3	0	4	0	7	0	8	0	4	0	4	0	6	0.263158	3.78947
ENSCAFG00000013252	7	16632206	NMNAT2	protein_coding	KNOWN_BY_PROJECTION	0	0	7	0	3	3	0	0	0	3	0	0	0	0	0	0	0	3	0	3	0	3	0	3	0	0	0	3	0	3	0	0	0	0	0	3	0	3	0	0	1	3	0.210526	1.73684
ENSCAFG00000007146	25	15207876	SACS	protein_coding	KNOWN_BY_PROJECTION	0	0	8	1	0	0	0	0	3	2	1	2	4	3	3	2	0	0	3	3	3	2	3	4	3	2	4	4	3	2	3	2	3	3	4	2	3	3	3	2	3	2	2.57895	2.10526
ENSCAFG00000000767	10	19668833	CELSR1	protein_coding	KNOWN_BY_PROJECTION	20	16	7	1	32	28	8	8	2	26	4	26	6	18	2	26	4	26	8	30	2	18	4	26	6	16	4	22	4	20	6	32	10	30	0	26	6	24	4	30	4	38	6.10526	24.7368
ENSCAFG00000009271	28	11067587	CRTAC1	protein_coding	KNOWN_BY_PROJECTION	0	0	7	0	0	0	0	0	0	0	0	2	0	0	0	0	0	2	0	2	2	2	0	0	0	0	0	0	2	2	0	0	0	4	0	0	0	2	0	0	0	0	0.210526	0.842105
ENSCAFG00000016769	7	41296377	NES	protein_coding	KNOWN_BY_PROJECTION	7	4	7	1	4	4	7	6	1	1	0	1	0	4	1	3	1	3	0	4	0	1	0	1	0	4	1	6	1	3	0	4	1	3	0	4	2	6	3	4	0	4	1.15789	3.47368
ENSCAFG00000003841	16	7125102	MGAM	protein_coding	KNOWN_BY_PROJECTION	18	12	14	2	0	0	0	0	0	2	0	0	0	0	0	0	0	0	0	0	0	0	0	0	6	16	0	0	0	2	0	0	6	16	0	0	6	16	2	2	8	14	1.47368	3.57895
ENSCAFG00000011298	28	25089305	VWA2	protein_coding	KNOWN_BY_PROJECTION	0	0	7	0	0	0	0	0	0	9	0	6	6	11	9	9	19	29	0	6	9	17	4	17	11	15	9	27	12	41	8	17	3	20	2	9	6	14	9	12	6	6	5.94737	13.9474
ENSCAFG00000016211	27	45406470	MICAL3	protein_coding	KNOWN_BY_PROJECTION	0	0	7	0	0	0	0	0	0	0	4	7	0	0	0	0	0	2	0	0	0	0	0	0	0	0	0	0	0	0	0	0	0	0	0	0	0	0	2	5	0	0	0.315789	0.736842
ENSCAFG00000009311	33	7039971		protein_coding	NOVEL	9	1	9	1	9	1	9	1	3	2	2	0	1	0	3	2	7	4	6	4	11	6	10	6	6	4	3	2	6	3	9	3	8	1	3	2	1	0	3	0	8	2	5.68421	2.26316
ENSCAFG00000008167	26	7446267	SETD1B	protein_coding	KNOWN_BY_PROJECTION	8	2	16	2	8	2	8	2	4	0	4	8	6	2	4	6	8	6	6	4	4	0	2	0	6	2	6	10	4	2	6	0	4	10	4	0	6	2	6	4	4	6	5.26316	3.47368
ENSCAFG00000018683	7	74839982	MTCL1	protein_coding	KNOWN_BY_PROJECTION	19	14	7	0	11	9	27	19	0	6	4	9	2	0	10	9	4	9	4	11	4	16	2	14	4	6	6	9	4	14	4	6	2	10	6	11	4	6	6	9	2	12	5.57895	9.73684
ENSCAFG00000012045	31	39578036	PCNT	protein_coding	KNOWN_BY_PROJECTION	1	1	7	1	1	1	1	1	0	1	0	12	0	3	5	1	5	2	5	2	5	2	5	1	34	43	0	4	2	4	0	4	0	4	0	3	0	1	22	44	13	22	5.15789	8.15789
ENSCAFG00000024978	24	15803125	LRRN4	protein_coding	KNOWN_BY_PROJECTION	6	1	8	1	6	1	6	1	0	0	0	0	5	3	5	4	0	0	6	3	0	0	0	0	6	3	6	4	0	0	6	4	0	0	5	4	6	4	5	4	0	0	3.26316	1.84211
ENSCAFG00000010061	2	66817195	ABCC11	protein_coding	KNOWN_BY_PROJECTION	6	4	13	2	8	6	6	4	0	4	0	6	0	0	4	4	0	4	0	6	2	6	0	0	0	4	0	4	0	4	0	4	0	0	0	4	0	4	2	6	0	0	1.15789	3.68421
ENSCAFG00000009951	17	55246240	SPAG17	protein_coding	KNOWN_BY_PROJECTION	9	6	7	0	17	10	7	2	6	7	9	10	8	11	3	1	6	10	6	7	3	3	7	7	5	11	7	14	4	7	5	8	5	4	8	10	10	10	3	9	6	10	6.57895	7.94737
ENSCAFG00000018152	30	39930919	C15orf27	protein_coding	KNOWN_BY_PROJECTION	5	1	7	1	5	1	5	1	2	4	0	2	0	0	7	6	9	8	7	6	11	8	7	8	9	11	0	0	0	0	2	2	4	7	2	4	2	5	2	4	4	7	4.10526	4.42105
ENSCAFG00000002645	12	35194916	KCNQ5	protein_coding	KNOWN_BY_PROJECTION	0	0	6	0	0	0	0	0	0	0	0	0	0	0	0	0	0	0	0	0	0	0	0	0	0	0	0	0	0	0	0	0	0	0	0	0	0	0	0	0	0	2	0	0.105263
ENSCAFG00000006722	20	25701363		protein_coding	KNOWN	1	1	6	0	0	0	0	0	0	0	0	2	0	2	0	3	0	0	0	2	0	2	0	2	0	0	0	2	0	0	0	2	0	2	0	4	0	0	0	1	0	5	0	1.52632
ENSCAFG00000010798	7	1598553	TNNT2	protein_coding	KNOWN_BY_PROJECTION	0	0	6	0	0	0	0	0	0	0	0	0	0	0	0	0	0	0	0	6	0	6	0	0	0	0	0	0	0	0	0	0	0	0	0	0	0	0	0	0	0	0	0	0.631579
ENSCAFG00000012374	28	31303479	FGFR2IIIC	protein_coding	KNOWN	0	0	6	0	0	0	0	0	0	6	0	6	0	0	0	6	0	15	0	3	0	6	0	0	0	3	0	6	0	6	0	3	0	6	0	6	0	6	0	6	0	9	0	4.89474
ENSCAFG00000015372	3	65200069	CPEB2	protein_coding	KNOWN_BY_PROJECTION	0	0	6	0	0	0	0	0	0	0	0	0	0	0	0	0	0	0	0	0	0	0	0	0	0	0	0	0	0	0	0	0	0	0	0	0	0	0	0	0	0	0	0	0
ENSCAFG00000016761	4	38608260	CPEB4	protein_coding	KNOWN_BY_PROJECTION	0	0	6	0	0	0	0	0	0	0	0	2	0	0	0	0	0	0	0	0	0	0	0	0	0	0	0	0	0	0	0	0	0	0	0	0	0	0	0	0	0	0	0	0.105263
ENSCAFG00000019424	6	38837964	PKD1	protein_coding	KNOWN	4	1	7	0	8	4	4	1	2	4	1	1	4	4	4	4	4	5	4	5	3	1	1	4	3	1	4	3	2	4	4	5	4	4	5	5	4	4	4	4	4	6	3.63158	3.63158
ENSCAFG00000016534	8	42710290	ACTN1	protein_coding	KNOWN_BY_PROJECTION	0	0	6	0	0	0	2	2	0	8	0	6	0	8	0	6	0	0	0	4	0	0	0	0	0	2	0	0	0	0	0	8	0	8	0	6	0	6	0	6	0	10	0.105263	4.21053
ENSCAFG00000003456	18	5344269	VSTM2A	protein_coding	KNOWN_BY_PROJECTION	0	0	6	0	0	0	0	0	0	0	0	3	0	3	0	3	0	0	0	0	0	3	0	3	1	0	0	3	0	3	0	0	0	3	0	3	0	0	0	3	0	0	0.0526316	1.57895
ENSCAFG00000005667	23	16804805	NEK10	protein_coding	KNOWN_BY_PROJECTION	0	0	6	1	0	0	0	0	0	2	0	1	0	1	0	2	0	2	0	2	0	2	0	1	0	1	0	1	0	1	0	1	0	1	1	1	0	0	0	1	0	3	0.0526316	1.21053
ENSCAFG00000008827	17	49301722	ALMS1	protein_coding	KNOWN_BY_PROJECTION	13	6	15	2	13	7	17	6	5	2	0	0	7	8	5	2	13	6	14	6	6	6	6	6	0	0	16	9	6	6	5	2	7	6	0	0	6	6	9	8	5	4	7.36842	4.73684
ENSCAFG00000003803	15	9414047	NRD1	protein_coding	KNOWN_BY_PROJECTION	0	0	6	0	0	0	6	6	0	6	0	6	0	6	0	2	0	6	0	6	0	2	0	6	0	6	0	2	0	2	0	6	0	6	0	6	0	0	0	6	0	2	0.315789	4.31579
ENSCAFG00000008246	29	23350800	CRISPLD1	protein_coding	KNOWN_BY_PROJECTION	0	0	6	0	0	0	0	0	0	0	0	0	0	0	0	0	0	0	0	0	0	0	0	0	0	0	0	0	0	0	0	0	0	0	0	0	0	0	2	0	0	0	0.105263	0
ENSCAFG00000006528	18	25670677	RASSF7	protein_coding	KNOWN_BY_PROJECTION	0	0	6	0	3	3	0	0	0	0	0	0	0	3	0	3	0	0	0	3	0	0	0	0	0	0	0	3	0	0	0	6	0	0	0	0	0	0	0	3	0	0	0.157895	1.26316
ENSCAFG00000010203	26	16083354	GCN1L1	protein_coding	KNOWN_BY_PROJECTION	2	2	12	2	2	2	2	2	0	0	2	14	0	0	2	12	2	34	0	0	0	0	0	16	2	12	0	20	2	25	0	20	0	0	2	20	8	16	2	12	2	12	1.47368	11.4211
ENSCAFG00000010744	7	1140998	NAV1	protein_coding	KNOWN_BY_PROJECTION	2	2	6	0	6	6	6	6	0	2	0	2	0	2	0	6	0	4	0	6	0	4	0	4	0	6	0	2	0	2	0	8	0	2	0	8	0	8	0	6	0	4	0.631579	4.63158
ENSCAFG00000010872	2	69346262	BAI2	protein_coding	KNOWN_BY_PROJECTION	2	2	12	2	8	6	6	6	0	2	0	6	0	6	0	6	0	6	0	6	0	6	0	8	2	10	0	8	0	2	0	6	0	6	0	6	0	6	0	6	0	2	0.842105	5.78947
ENSCAFG00000003045	12	46685615	ZNF292	protein_coding	KNOWN_BY_PROJECTION	1	1	6	1	4	4	5	5	0	4	0	5	0	5	1	4	0	4	0	4	0	4	0	5	1	6	0	4	0	4	0	6	0	4	1	4	0	4	0	4	0	1	0.631579	4.26316
ENSCAFG00000000272	1	30482370	KIAA1244	protein_coding	KNOWN_BY_PROJECTION	10	10	6	0	14	14	14	14	0	10	0	16	0	4	0	24	0	10	0	14	0	10	0	12	2	16	0	10	2	12	0	14	0	6	2	8	0	18	2	10	0	16	1.89474	12.5263
ENSCAFG00000013302	8	13604626	BAZ1A	protein_coding	KNOWN_BY_PROJECTION	0	0	6	0	0	0	0	0	0	2	0	0	0	2	0	4	0	0	0	0	0	0	0	0	0	0	0	0	0	0	0	0	0	0	0	0	2	2	0	2	0	0	0.105263	0.631579
ENSCAFG00000018311	8	71644322	TDRD9	protein_coding	KNOWN_BY_PROJECTION	0	0	6	0	3	3	3	3	0	3	0	3	0	3	0	3	0	3	0	3	0	0	0	3	0	0	3	0	0	3	0	3	0	3	0	6	0	3	0	3	0	3	0.473684	2.68421
ENSCAFG00000016732	8	45110084	SIPA1L1	protein_coding	KNOWN_BY_PROJECTION	6	6	6	0	0	0	10	10	2	2	0	2	0	0	4	2	0	8	0	6	0	2	0	2	0	4	0	6	0	8	0	6	0	2	0	6	0	6	0	8	0	4	0.842105	4.42105
ENSCAFG00000006901	25	13199024	RNF6	protein_coding	KNOWN_BY_PROJECTION	0	0	6	0	0	0	0	0	0	0	2	8	0	0	0	0	0	0	0	0	0	0	0	0	0	0	2	8	0	0	0	0	0	0	2	8	0	0	0	0	0	6	0.315789	1.57895
ENSCAFG00000004385	17	20517354	OTOF	protein_coding	KNOWN_BY_PROJECTION	8	8	6	0	8	6	18	18	0	0	0	8	0	8	0	8	0	0	2	14	0	8	0	8	0	0	2	10	0	0	2	8	2	10	2	22	0	8	0	4	0	18	1.89474	8.31579
ENSCAFG00000006851	2	42920024	SLC38A9	protein_coding	KNOWN_BY_PROJECTION	2	2	6	0	2	2	4	2	0	0	2	2	0	2	0	2	0	2	0	2	0	2	0	2	0	2	0	2	0	2	0	0	0	2	0	2	0	2	0	2	0	2	0.421053	1.78947
ENSCAFG00000001101	1	66594435	PTPRK	protein_coding	KNOWN_BY_PROJECTION	0	0	12	2	2	2	0	0	0	0	0	0	0	0	0	0	0	0	0	0	0	0	0	0	0	0	0	0	0	0	0	0	0	0	0	0	0	0	0	2	0	4	0.105263	0.421053
ENSCAFG00000018955	5	52680687	C1orf168	protein_coding	KNOWN_BY_PROJECTION	0	0	9	0	12	2	4	0	0	0	0	0	0	0	0	0	0	2	0	0	4	0	0	0	0	0	0	0	0	0	0	0	6	0	0	0	0	0	0	0	0	4	1.36842	0.421053
ENSCAFG00000003282	11	68254328	ZNF618	protein_coding	KNOWN_BY_PROJECTION	8	6	6	0	8	6	8	6	0	10	2	6	2	8	2	8	0	10	2	6	2	6	2	6	2	8	2	8	2	8	0	6	0	4	2	10	2	8	2	8	2	8	2.21053	7.36842
ENSCAFG00000008018	25	26542078		protein_coding	NOVEL	2	1	6	1	2	1	2	1	2	5	1	3	1	3	2	5	1	5	0	2	1	5	1	5	1	3	1	3	1	5	0	2	1	5	1	3	2	5	1	5	1	2	1.15789	3.57895
ENSCAFG00000014454	5	24182135	ATM	protein_coding	KNOWN	19	15	6	0	24	20	35	31	4	21	4	21	4	21	4	29	2	0	4	18	4	21	2	19	4	21	4	21	4	21	2	0	4	29	4	21	4	21	4	29	2	0	6.26316	19.1579
ENSCAFG00000014183	5	21323663	PPP2R1B	protein_coding	KNOWN_BY_PROJECTION	4	3	6	0	2	2	8	7	0	0	0	2	1	5	1	3	0	2	1	5	0	2	0	2	1	5	1	3	0	2	1	5	0	2	2	5	1	5	1	5	1	2	1.10526	3.36842
ENSCAFG00000013148	27	32471153	GRIN2B	protein_coding	KNOWN	0	0	12	2	0	0	0	0	0	0	0	2	2	2	0	0	0	0	0	4	0	0	0	2	0	2	2	0	2	0	0	4	0	0	0	0	0	2	0	0	0	0	0.315789	0.947368
ENSCAFG00000015046	8	31157233	ATG14	protein_coding	KNOWN_BY_PROJECTION	0	0	6	1	0	0	1	1	0	0	0	0	0	0	0	0	0	0	0	1	0	0	0	1	1	0	0	0	0	1	0	0	0	1	0	0	0	1	0	0	0	0	0.105263	0.315789
ENSCAFG00000006240	22	60474400	MCF2L	protein_coding	KNOWN_BY_PROJECTION	9	9	6	0	0	0	0	0	0	3	0	3	0	0	0	6	4	3	0	3	1	0	1	3	1	6	3	0	0	3	1	3	0	3	4	3	0	3	0	0	1	3	0.842105	2.36842
ENSCAFG00000002175	13	48109719	EXOC1	protein_coding	KNOWN_BY_PROJECTION	0	0	6	0	2	2	0	0	0	0	0	0	0	0	3	3	0	2	0	0	0	0	0	0	0	0	0	0	0	0	0	0	0	0	0	2	0	0	0	2	0	3	0.263158	0.736842
ENSCAFG00000010973	3	47044073	RGMA	protein_coding	KNOWN_BY_PROJECTION	4	4	12	2	2	2	4	2	0	0	0	0	2	2	0	2	0	0	0	2	0	0	0	2	0	0	0	2	0	0	2	2	0	0	0	2	0	2	0	4	0	4	0.526316	1.47368
ENSCAFG00000009735	30	8866785	PLA2G4B	protein_coding	KNOWN	2	0	8	0	2	0	2	0	4	2	4	2	2	2	6	2	8	2	12	4	8	2	8	2	10	4	4	2	4	6	2	0	2	0	4	2	4	0	4	4	2	3	4.84211	2.05263
ENSCAFG00000009850	34	805165	DNAH5	protein_coding	KNOWN_BY_PROJECTION	6	0	21	3	6	0	6	0	3	0	12	8	18	10	12	7	21	15	21	15	36	42	30	23	21	15	21	15	30	23	25	19	40	28	15	11	27	18	9	8	12	10	19.2105	14.0526
ENSCAFG00000008875	23	50253666	TIPARP	protein_coding	KNOWN_BY_PROJECTION	0	0	6	0	0	0	0	0	0	3	0	0	0	0	0	0	0	0	0	0	0	0	0	0	0	0	0	0	0	0	0	0	0	0	0	0	0	3	0	0	3	2	0.157895	0.421053
ENSCAFG00000001974	1	89480399	KANK1	protein_coding	KNOWN_BY_PROJECTION	9	6	6	1	8	6	4	3	0	1	1	4	0	1	2	5	1	3	0	3	1	2	1	3	1	1	1	5	2	6	0	2	0	4	0	2	1	2	1	4	1	5	1.31579	3.26316
ENSCAFG00000002554	10	47742907	SRBD1	protein_coding	KNOWN_BY_PROJECTION	0	0	6	0	2	2	2	2	0	0	2	4	2	2	2	4	2	4	2	4	0	2	2	4	0	2	0	2	2	2	0	2	2	4	0	2	0	2	2	4	4	4	1.36842	2.73684
[truncated: 24,466 more rows]
[truncated: 6 more columns]

## Sheet: Table S5
Table S5. Gene Set Enrichment Analysis results for Reactome and KEGG Pathways, based on the gene list for high-impact somatic mutations including stop gained, stop lost, frameshift, and exon-disrupting SVs.
[truncated: 2,210 more rows]
[truncated: 53 more columns]

[truncated: 4 more sheets: Table S6, Table S7, Table S8, Table S9]
